# Supplementary material for: Amine-catalyzed and functional group-controlled chemo- and regioselective synthesis of multi-functionalized CF3-benzeneviaa metal-free process
Source: Royal Society of Chemistry journal article supplement (doi:10.1039/c9gc02694k), 2019-01-01

**Amine-catalyzed and functional group-controlled chemo- and  
regioselective synthesis of multi-functionalized CF<sub>3</sub>-benzene  
via a metal-free process**

Fu Peng,<sup>†a</sup> Qian Zhao,<sup>†b</sup> Wei Huang,<sup>b</sup> Shuai-Jiang Liu,<sup>b</sup> Ya-Jun Zhong,<sup>b</sup> Qing Mao,<sup>b</sup> Nan Zhang,<sup>a</sup>

Gu He<sup>\*a</sup> and Bo Han<sup>\*b</sup>

<sup>a</sup> State Key Laboratory of Biotherapy, West China Hospital, West China School of Pharmacy,  
Sichuan University, Chengdu 610041, China. E-mail: hegu@scu.edu.cn

<sup>b</sup> State Key Laboratory of Southwestern Chinese Medicine Resources, Chengdu University of  
Traditional Chinese Medicine, Chengdu 611137, China. E-mail: hanbo@cdutcm.edu.cn

<sup>†</sup> These authors contributed equally.

**Supporting Information**

**Table of Contents**

|                                                                                            |      |
|--------------------------------------------------------------------------------------------|------|
| <b>1. General methods</b> .....                                                            | S2   |
| <b>2. The synthesis of CF<sub>3</sub>-functionalized multi-substituted benzenes</b> .....  | S2   |
| 2.1 Procedure for <b>3</b> .....                                                           | S2   |
| 2.2 Procedure for <b>5</b> .....                                                           | S26  |
| 2.3 Procedure for <b>7</b> .....                                                           | S48  |
| <b>3. Synthetic transformations of 5a</b> .....                                            | S57  |
| 3.1 Procedure for terminal alkyne <b>8</b> .....                                           | S57  |
| 3.2 Procedure for CF <sub>3</sub> -functionalized benzene-Zidovudine hybrid <b>9</b> ..... | S58  |
| <b>4. Crystal data of 3a</b> .....                                                         | S60  |
| <b>5. Crystal data of 5a</b> .....                                                         | S61  |
| <b>6. Crystal data of 7e</b> .....                                                         | S62  |
| <b>7. NMR spectra</b> .....                                                                | S63  |
| <b>8. HRMS spectra</b> .....                                                               | S144 |
| <b>9. Control experiments results</b> .....                                                | S184 |

## 1. General methods

- Proton nuclear magnetic resonance ( $^1\text{H}$  NMR) spectra were recorded with Bruker Avance III 400 MHz spectrometers. Proton chemical shifts are reported in parts per million ( $\delta$  scale), and are referenced using residual protium in the NMR solvent ( $\text{CDCl}_3$ ;  $\delta$  7.26). Data are reported as follows: chemical shift [multiplicity (s = singlet, d = doublet, t = triplet, q = quartet, m = multiplet, br s = broad singlet), coupling constant(s) (Hz), integration].
- Carbon-13 nuclear magnetic resonance ( $^{13}\text{C}$  NMR) spectra were recorded with Bruker Avance 400 MHz spectrometers. Carbon chemical shifts are reported in parts per million ( $\delta$  scale), and are referenced using the carbon resonances of the solvent ( $\text{CDCl}_3$ ;  $\delta$  77.0). Data are reported as follows: chemical shift [multiplicity (if not singlet), assignment ( $\text{C}_q$  = fully substituted carbon)].
- High resolution mass spectra (HRMS) were recorded on a Waters SYNAPT G2 or Agilent G1969-85000 using an electrospray (ESI) ionization source.
- Column chromatography was performed on silica gel (400-500 mesh) eluting with ethyl acetate and petroleum ether. TLC was performed on glass-backed silica plates. UV light and  $\text{I}_2$  were used to visualize products.
- Melting points were determined on a Mel-Temp apparatus and are uncorrected.

## 2. The synthesis of $\text{CF}_3$ -functionalized multi-substituted benzenes

### 2.1 Procedure for 3

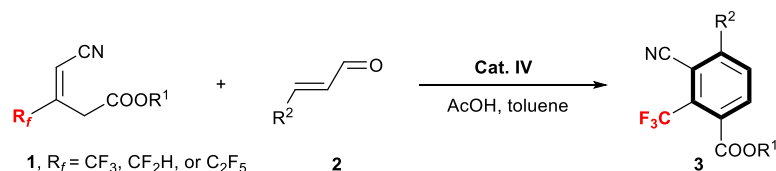

The reaction was carried out with **1** (0.20 mmol) and **2** (0.30 mmol), amine catalyst **IV** (0.05 mmol) and AcOH (0.08 mmol) in toluene (2 mL) under an open atmosphere at 70 °C for 8 h. Then the reaction mixture was concentrated and the residue was purified by flash chromatography on silica gel (petroleum ether/ethyl acetate = 80:1) to

give the final CF<sub>3</sub>-functionlized tetra-substuted benzenes **3**, which was further analyzed by <sup>1</sup>H NMR, <sup>13</sup>C HMR, HRMS analysis.

**ethyl 2-cyano-3-(trifluoromethyl)-[1,1'-biphenyl]-4-carboxylate**

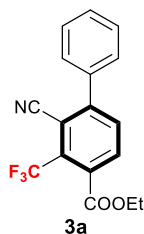

Prepared according to the general procedure using ethyl (*E*)-4-cyano-3-(trifluoromethyl)but-3-enoate (41.4 mg, 0.20 mmol) and cinnamaldehyde (39.7 mg, 0.3 mmol). Purification of the crude product *via* column chromatography delivered **3a** as a white solid with 76% yield (48.6 mg). m.p. 68-70 °C.

*NMR and HRMS data for the product 3a:*

**<sup>1</sup>H NMR (400 MHz, CDCl<sub>3</sub>):** δ = 7.80 (d, *J* = 8.0 Hz, 1H), 7.73 (d, *J* = 8.0 Hz, 1H), 7.53-7.50 (m, 5H), 4.44 (q, *J* = 7.2 Hz, 2H), 1.4 (t, *J* = 7.2 Hz, 3H) ppm.

**<sup>13</sup>C NMR (100 MHz, CDCl<sub>3</sub>):** δ = 166.4, 149.8, 136.6, 133.4, 132.9 (q, *J* = 2.0 Hz), 132.2, 131.2 (d, *J* = 36.0 Hz), 129.8, 129.0, 128.9, 122.1 (d, *J* = 274.0 Hz), 114.5, 110.3 (d, *J* = 2.0 Hz), 62.9, 13.9 ppm.

**HRMS (ESI):** *m/z* calculated for C<sub>17</sub>H<sub>12</sub>F<sub>3</sub>NO<sub>2</sub>+Na 342.0718, found 342.0714.

**ethyl 2'-chloro-2-cyano-3-(trifluoromethyl)-[1,1'-biphenyl]-4-carboxylate**

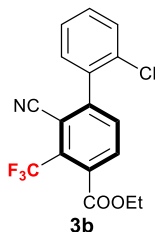

Prepared according to the general procedure using ethyl (*E*)-4-cyano-3-(trifluoromethyl)but-3-enoate (41.4 mg, 0.20 mmol) and 2-chlorocinnamaldehyde (50.0 mg, 0.3 mmol). Purification of the crude product *via* column chromatography delivered **3b** as a white solid with 73% yield (51.6 mg). m.p. 68-70 °C.

*NMR and HRMS data for the product 3b:*

**<sup>1</sup>H NMR (400 MHz, CDCl<sub>3</sub>):** δ = 7.83 (d, *J* = 8.0 Hz, 1H), 7.69 (d, *J* = 8.0 Hz, 1H), 7.56 (dd, *J* = 8.0, 1.6 Hz, 1H), 7.48-7.40 (m, 2H), 7.34 (dd, *J* = 7.6, 2.0 Hz, 1H), 4.45 (q, *J* = 7.2 Hz, 2H), 1.41 (t, *J* = 7.2 Hz, 3H) ppm.

**<sup>13</sup>C NMR (100 MHz, CDCl<sub>3</sub>):** δ = 166.3, 147.2, 135.5, 134.0, 133.6 (q, *J* = 2.0 Hz), 132.8, 132.0, 131.1, 130.8, 130.7 (d, *J* = 32.0 Hz), 130.2, 127.2, 122.0 (d, *J* = 274.0 Hz), 113.7, 112.0 (d, *J* = 2.0 Hz), 63.0, 13.9 ppm.

**HRMS (ESI):** *m/z* calculated for C<sub>17</sub>H<sub>11</sub>ClF<sub>3</sub>NO<sub>2</sub>+Na 376.0328, found 376.0325.

**ethyl 3'-chloro-2-cyano-3-(trifluoromethyl)-[1,1'-biphenyl]-4-carboxylate**

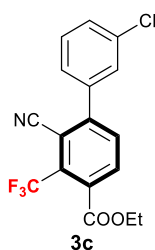

Prepared according to the general procedure using ethyl (*E*)-4-cyano-3-(trifluoromethyl)but-3-enoate (41.4 mg, 0.20 mmol) and 3-chlorocinnamaldehyde (50.0 mg, 0.3 mmol). Purification of the crude product *via* column chromatography delivered **3c** as a white solid with 78% yield (54.9 mg). m.p. 89-91 °C.

*NMR and HRMS data for the product 3c:*

**<sup>1</sup>H NMR (400 MHz, CDCl<sub>3</sub>):** δ = 7.82 (d, *J* = 8.0 Hz, 1H), 7.71 (d, *J* = 8.0 Hz, 1H), 7.52-7.45 (m, 3H), 7.42 (dt, *J* = 7.2, 1.6 Hz, 1H), 4.44 (q, *J* = 7.2 Hz, 2H), 1.40 (t, *J* = 7.2 Hz, 3H) ppm.

**<sup>13</sup>C NMR (100 MHz, CDCl<sub>3</sub>):** δ = 166.2, 148.1, 138.2, 135.0, 133.5 (d, *J* = 3.0 Hz), 133.2, 132.4, 131.3 (d, *J* = 33.0 Hz), 130.2, 130.0, 129.0, 127.2, 122.0 (d, *J* = 274.0 Hz), 114.1, 110.4 (d, *J* = 3.0 Hz), 63.0, 13.9 ppm.

**HRMS (ESI):** *m/z* calculated for C<sub>17</sub>H<sub>11</sub>ClF<sub>3</sub>NO<sub>2</sub>+Na 376.0328, found 376.0326.



**ethyl 4'-chloro-2-cyano-3-(trifluoromethyl)-[1,1'-biphenyl]-4-carboxylate**

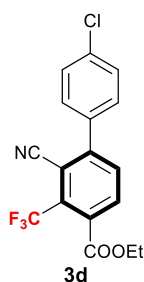

Prepared according to the general procedure using ethyl (*E*)-4-cyano-3-(trifluoromethyl)but-3-enoate (41.4 mg, 0.20 mmol) and 4-chlorocinnamaldehyde (50.0 mg, 0.3 mmol). Purification of the crude product *via* column chromatography delivered **3d** as a white solid with 77% yield (54.2 mg). m.p. 94-96 °C.

*NMR and HRMS data for the product 3d:*

**<sup>1</sup>H NMR (400 MHz, CDCl<sub>3</sub>):** δ = 7.81 (d, *J* = 8.0 Hz, 1H), 7.70 (d, *J* = 8.4 Hz, 1H), 7.53-7.50 (m, 2H), 7.48-7.45 (m, 2H), 4.43 (q, *J* = 7.2 Hz, 2H), 2.43 (s, 3H), 1.40 (t, *J* = 7.2 Hz, 3H) ppm;

**<sup>13</sup>C NMR (100 MHz, CDCl<sub>3</sub>):** δ = 166.2, 148.5, 136.3, 134.9, 133.3 (d, *J* = 2.0 Hz), 133.2, 132.4, 131.3 (d, *J* = 33.0 Hz), 130.3, 129.3, 122.0 (d, *J* = 275.0 Hz), 114.3, 110.3 (d, *J* = 2.0 Hz), 63.0, 13.9 ppm;

**HRMS (ESI):** m/z calculated for C<sub>17</sub>H<sub>11</sub>ClF<sub>3</sub>NO<sub>2</sub>+Na 376.0328, found 376.0331.

**ethyl 2'-bromo-2-cyano-3-(trifluoromethyl)-[1,1'-biphenyl]-4-carboxylate**

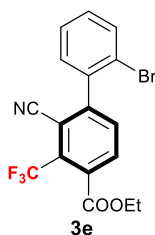

Prepared according to the general procedure using ethyl (*E*)-4-cyano-3-(trifluoromethyl)but-3-enoate (41.4 mg, 0.2 mmol) and 2-bromocinnamaldehyde (63.3 mg, 0.3 mmol). Purification of the crude product *via* column chromatography delivered **3e** as a white solid with 71% yield (56.5 mg). m.p. 96-98 °C.

*NMR and HRMS data for the product 3e:*

**<sup>1</sup>H NMR (400 MHz, CDCl<sub>3</sub>):** δ = 7.83 (d, *J* = 8.0 Hz, 1H), 7.75 (d, *J* = 8.0, 1.2 Hz, 1H), 7.67 (d, *J* = 8.0 Hz, 1H), 7.47 (td, *J* = 7.2, 1.2 Hz, 1H), 7.40-7.31 (m, 2H), 4.45 (q, *J* = 7.2 Hz, 2H), 1.42 (t, *J* = 7.2 Hz, 3H) ppm.

**<sup>13</sup>C NMR (100 MHz, CDCl<sub>3</sub>):** δ = 166.3, 148.8, 137.5, 133.9, 133.6 (q, *J* = 2.0 Hz), 133.4, 132.0, 131.2, 130.7, 130.6 (d, *J* = 33.0 Hz), 127.8, 122.5, 122.0 (, *J* = 274.0 Hz), 113.6, 110.9 (d, *J* = 2.0 Hz), 63.0, 13.9 ppm.

**HRMS (ESI):** *m/z* calculated for C<sub>17</sub>H<sub>11</sub>BrF<sub>3</sub>NO<sub>2</sub>+Na 419.9823, found 419.9819.

**ethyl 3'-bromo-2-cyano-3-(trifluoromethyl)-[1,1'-biphenyl]-4-carboxylate**

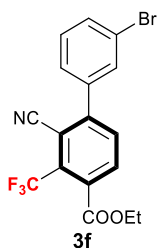

Prepared according to the general procedure using ethyl (*E*)-4-cyano-3-(trifluoromethyl)but-3-enoate (41.4 mg, 0.2 mmol) and 3-bromocinnamaldehyde (63.3 mg, 0.3 mmol). Purification of the crude product *via* column chromatography delivered **3f** as a white solid with 76% yield (60.3 mg). m.p. 102-104 °C.

*NMR and HRMS data for the product 3f:*

**<sup>1</sup>H NMR (400 MHz, CDCl<sub>3</sub>):** δ = 7.81 (d, *J* = 8.0 Hz, 1H), 7.71 (d, *J* = 8.0, 1.2 Hz, 1H), 7.67-7.63 (m, 2H), 7.49-7.47 (m, 1H), 7.40 (td, *J* = 8.0, 0.4 Hz, 1H), 4.44 (q, *J* = 7.2 Hz, 2H), 1.40 (t, *J* = 7.2 Hz, 3H) ppm.

**<sup>13</sup>C NMR (100 MHz, CDCl<sub>3</sub>):** δ = 166.2, 148.0, 138.4, 133.5 (q, *J* = 2.0 Hz), 133.3, 132.8, 132.4, 131.8, 131.3 (d, *J* = 32.0 Hz), 130.4, 127.7, 123.0, 122.0 (d, *J* = 274.0 Hz), 114.1, 110.4 (d, *J* = 2.0 Hz), 63.0, 13.9 ppm.

**HRMS (ESI):** *m/z* calculated for C<sub>17</sub>H<sub>11</sub>BrF<sub>3</sub>NO<sub>2</sub>+Na 419.9823, found 419.9821.

**ethyl 4'-bromo-2-cyano-3-(trifluoromethyl)-[1,1'-biphenyl]-4-carboxylate**

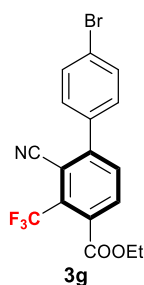

Prepared according to the general procedure using ethyl (*E*)-4-cyano-3-(trifluoromethyl)but-3-enoate (41.4 mg, 0.2 mmol) and 4-bromocinnamaldehyde (63.3 mg, 0.3 mmol). Purification of the crude product *via* column chromatography delivered **3g** as a white solid with 78% yield (61.8 mg). m.p. 101-103 °C.

*NMR and HRMS data for the product 3g:*

**<sup>1</sup>H NMR (400 MHz, CDCl<sub>3</sub>):** δ = 7.81 (d, *J* = 8.0 Hz, 1H), 7.70 (d, *J* = 8.0 Hz, 1H), 7.68-7.65 (m, 2H), 7.41-7.38 (m, 2H), 4.43 (q, *J* = 7.2 Hz, 2H), 1.41 (t, *J* = 7.2 Hz, 3H) ppm.

**<sup>13</sup>C NMR (100 MHz, CDCl<sub>3</sub>):** δ = 166.2, 148.5, 135.4, 133.3 (q, *J* = 2.0 Hz), 133.2, 132.4, 132.2, 131.3 (d, *J* = 33.0 Hz), 130.5, 124.5, 122.0 (, *J* = 274.0 Hz), 114.3, 110.2 (d, *J* = 2.0 Hz), 63.0, 13.9 ppm.

**HRMS (ESI):** m/z calculated for C<sub>17</sub>H<sub>11</sub>BrF<sub>3</sub>NO<sub>2</sub>+Na 419.9823, found 419.9826.

**ethyl 2-cyano-2'-fluoro-3-(trifluoromethyl)-[1,1'-biphenyl]-4-carboxylate**

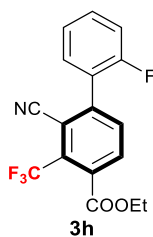

Prepared according to the general procedure using ethyl (*E*)-4-cyano-3-(trifluoromethyl)but-3-enoate (41.4 mg, 0.2 mmol) and 2-fluorocinnamaldehyde (45.1 mg, 0.3 mmol). Purification of the crude product *via* column chromatography delivered **3h** as a white solid with 72% yield (48.7 mg). m.p. 82-84 °C.

*NMR and HRMS data for the product 3h:*

**<sup>1</sup>H NMR (400 MHz, CDCl<sub>3</sub>):** δ = 7.82 (d, *J* = 8.0 Hz, 1H), 7.73 (d, *J* = 8.0 Hz, 1H), 7.54-7.48 (m, 1H), 7.40 (td, *J* = 7.6, 1.6 Hz, 1H), 7.33-7.28 (m, 1H), 7.24 (d, *J* = 8.8 Hz, 1H), 4.44 (q, *J* = 7.2 Hz, 2H), 1.41 (t, *J* = 7.2 Hz, 3H) ppm.

**<sup>13</sup>C NMR (100 MHz, CDCl<sub>3</sub>):** δ = 166.2, 159.3 (d, *J* = 248.0 Hz), 143.9, 134.2, 133.6 (q, *J* = 2.0 Hz), 132.1, 132.0 (d, *J* = 8.0 Hz), 131.1 (d, *J* = 2.0 Hz), 131.0 (d, *J* = 33.0 Hz), 124.7 (d, *J* = 4.0 Hz), 124.3 (d, *J* = 15.0 Hz), 122.0 (d, *J* = 274.0 Hz), 116.4 (d, *J* = 21.0 Hz), 113.9, 111.8 (d, *J* = 2.0 Hz), 63.0, 13.9 ppm.

**HRMS (ESI):** *m/z* calculated for C<sub>17</sub>H<sub>11</sub>F<sub>4</sub>NO<sub>2</sub>+Na 360.0624, found 360.0621.

**ethyl 2-cyano-3'-fluoro-3-(trifluoromethyl)-[1,1'-biphenyl]-4-carboxylate**

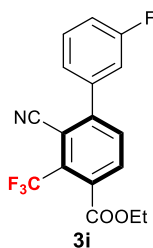

Prepared according to the general procedure using ethyl (*E*)-4-cyano-3-(trifluoromethyl)but-3-enoate (41.4 mg, 0.2 mmol) and 3-fluorocinnamaldehyde (45.1 mg, 0.3 mmol). Purification of the crude product *via* column chromatography delivered **3i** as a white solid with 73% yield (49.1 mg). m.p. 95-97 °C.

*NMR and HRMS data for the product 3i:*

**<sup>1</sup>H NMR (400 MHz, CDCl<sub>3</sub>):** δ = 7.82 (d, *J* = 8.0 Hz, 1H), 7.72 (d, *J* = 8.0 Hz, 1H), 7.54-7.48 (m, 1H), 7.33-7.30 (m, 1H), 7.25-7.20 (m, 2H), 4.44 (q, *J* = 7.2 Hz, 2H), 1.40 (t, *J* = 7.2 Hz, 3H) ppm.

**<sup>13</sup>C NMR (100 MHz, CDCl<sub>3</sub>):** δ = 166.2, 162.7 (d, *J* = 247.0 Hz), 148.3, 138.4 (d, *J* = 7.0 Hz), 133.5 (q, *J* = 2.0 Hz), 133.3, 132.4, 131.3 (d, *J* = 32.0 Hz), 130.7 (d, *J* = 8.0 Hz), 124.8 (d, *J* = 3.0 Hz), 122.0 (d, *J* = 274.0 Hz), 116.8 (d, *J* = 21.0 Hz), 116.2 (d, *J* = 22.0 Hz), 114.1, 110.4 (d, *J* = 2.0 Hz), 63.0, 13.9 ppm.

**HRMS (ESI):** *m/z* calculated for C<sub>17</sub>H<sub>11</sub>F<sub>4</sub>NO<sub>2</sub>+Na 360.0624, found 360.0625.

**ethyl 2-cyano-4'-fluoro-3-(trifluoromethyl)-[1,1'-biphenyl]-4-carboxylate**

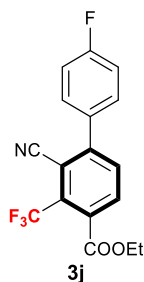

Prepared according to the general procedure using ethyl (*E*)-4-cyano-3-(trifluoromethyl)but-3-enoate (41.4 mg, 0.2 mmol) and 4-fluorocinnamaldehyde (45.1 mg, 0.3 mmol). Purification of the crude product *via* column chromatography delivered **3j** as a white solid with 75% yield (50.7 mg). m.p. 44-46 °C.

*NMR and HRMS data for the product 3j:*

**<sup>1</sup>H NMR (400 MHz, CDCl<sub>3</sub>):** δ = 7.80 (d, *J* = 8.4 Hz, 1H), 7.70 (d, *J* = 8.0 Hz, 1H), 7.51 (dd, *J* = 8.4, 5.2 Hz, 2H), 7.24-7.20 (m, 2H), 4.43 (q, *J* = 7.2 Hz, 2H), 1.40 (t, *J* = 7.2 Hz, 3H) ppm.

**<sup>13</sup>C NMR (100 MHz, CDCl<sub>3</sub>):** δ = 166.3, 163.6 (d, *J* = 279.0 Hz), 148.7, 133.3, 133.1 (q, *J* = 2.0 Hz), 132.6 (d, *J* = 3.0 Hz), 132.3, 131.2 (d, *J* = 32.0 Hz), 131.0 (d, *J* = 9.0 Hz), 122.0 (q, *J* = 274.0 Hz), 116.2 (d, *J* = 22.0 Hz), 114.4, 110.3 (d, *J* = 2.0 Hz), 63.0, 13.9 ppm.

**HRMS (ESI):** *m/z* calculated for C<sub>17</sub>H<sub>11</sub>F<sub>4</sub>NO<sub>2</sub>+Na 360.0624, found 360.0627.

**ethyl 2-cyano-2'-nitro-3-(trifluoromethyl)-[1,1'-biphenyl]-4-carboxylate**

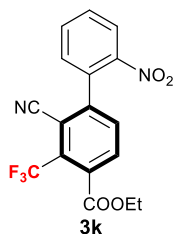

Prepared according to the general procedure using ethyl (*E*)-4-cyano-3-(trifluoromethyl)but-3-enoate (41.4 mg, 0.2 mmol) and 2-nitrocinnamaldehyde (53.2 mg, 0.3 mmol). Purification of the crude product *via* column chromatography delivered

**3k** as a white solid with 64% yield (46.3 mg). m.p. 74-76 °C.

*NMR and HRMS data for the product 3k:*

**<sup>1</sup>H NMR (400 MHz, CDCl<sub>3</sub>):** δ = 8.29 (dd, *J* = 8.0, 1.2 Hz, 1H), 7.84 (d, *J* = 8.0 Hz, 1H), 7.80 (td, *J* = 7.6, 1.2 Hz, 1H), 7.73 (td, *J* = 8.0, 1.6 Hz, 1H), 7.61 (d, *J* = 8.0 Hz, 1H), 7.41 (dd, *J* = 7.2, 1.2 Hz, 1H), 4.45 (q, *J* = 7.2 Hz, 2H), 1.42 (t, *J* = 7.2 Hz, 3H) ppm.

**<sup>13</sup>C NMR (100 MHz, CDCl<sub>3</sub>):** δ = 166.0, 147.4, 146.9, 134.0, 133.6 (q, *J* = 2.0 Hz), 132.5, 132.1, 132.0, 131.9, 130.9, 130.8 (q, *J* = 33.0 Hz), 125.5, 121.9 (q, *J* = 274.0 Hz), 113.6, 111.1 (d, *J* = 2.0 Hz), 63.1, 13.9 ppm.

**HRMS (ESI):** *m/z* calculated for C<sub>17</sub>H<sub>11</sub>F<sub>3</sub>N<sub>2</sub>O<sub>4</sub>+Na 387.0569, found 387.0570.

**ethyl 2-cyano-4'-nitro-3-(trifluoromethyl)-[1,1'-biphenyl]-4-carboxylate**

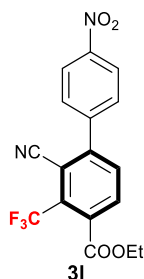

Prepared according to the general procedure using ethyl (*E*)-4-cyano-3-(trifluoromethyl)but-3-enoate (41.4 mg, 0.2 mmol) and 4-nitrocinnamaldehyde (53.2 mg, 0.3 mmol). Purification of the crude product *via* column chromatography delivered **3l** as a white solid with 68% yield (49.5 mg). m.p. 140-142 °C.

*NMR and HRMS data for the product 3l:*

**<sup>1</sup>H NMR (400 MHz, CDCl<sub>3</sub>):** δ = 8.41-8.39 (m, 2H), 7.88 (d, *J* = 8.0 Hz, 1H), 7.76 (d, *J* = 8.4 Hz, 1H), 7.73-7.70 (m, 2H), 4.45 (q, *J* = 7.2 Hz, 2H), 1.40 (t, *J* = 7.2 Hz, 3H) ppm.

**<sup>13</sup>C NMR (100 MHz, CDCl<sub>3</sub>):** δ = 165.9, 148.6, 147.1, 142.6, 134.2 (d, *J* = 2.0 Hz), 133.1, 132.7, 131.5 (d, *J* = 33.0 Hz), 130.2, 124.2, 121.8 (d, *J* = 274.0 Hz), 113.9, 110.4 (d, *J* = 2.0 Hz), 63.2, 13.9 ppm.

**HRMS (ESI):** m/z calculated for C<sub>17</sub>H<sub>11</sub>F<sub>3</sub>N<sub>2</sub>O<sub>4</sub>+Na 387.0569, found 387.0569.

**ethyl 2-cyano-3,3'-bis(trifluoromethyl)-[1,1'-biphenyl]-4-carboxylate**

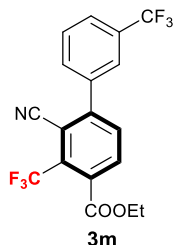

Prepared according to the general procedure using ethyl (*E*)-4-cyano-3-(trifluoromethyl)but-3-enoate (41.4 mg, 0.2 mmol) and 3-(trifluoromethyl) cinnamaldehyde (60.1 mg, 0.3 mmol). Purification of the crude product *via* column chromatography delivered **3m** as a white solid with 70% yield (53.9 mg). m.p. 58-60 °C.

*NMR and HRMS data for the product 3m:*

**<sup>1</sup>H NMR (400 MHz, CDCl<sub>3</sub>):** δ = 7.85 (d, *J* = 8.0 Hz, 1H), 7.80 (d, *J* = 8.0 Hz, 1H), 7.76-7.74 (m, 3H), 7.68 (t, *J* = 8.0 Hz, 1H), 4.45 (q, *J* = 7.2 Hz, 2H), 1.41 (t, *J* = 7.2 Hz, 3H) ppm.

**<sup>13</sup>C NMR (100 MHz, CDCl<sub>3</sub>):** δ = 166.1, 148.0, 137.3, 133.7 (d, *J* = 2.0 Hz), 133.3, 132.5, 132.4 (d, *J* = 1.0 Hz), 131.6 (q, *J* = 33.0 Hz), 131.4 (q, *J* = 32.0 Hz), 129.6, 126.5 (q, *J* = 1.6 Hz), 125.9 (q, *J* = 1.6 Hz), 123.7 (d, *J* = 271.0 Hz), 121.9 (d, *J* = 274.0 Hz), 114.1, 110.5 (d, *J* = 2.0 Hz), 63.1, 13.9 ppm.

**HRMS (ESI):** m/z calculated for C<sub>18</sub>H<sub>11</sub>F<sub>6</sub>NO<sub>2</sub>+Na 410.0592, found 410.0591.

**ethyl 2-cyano-4'-methyl-3-(trifluoromethyl)-[1,1'-biphenyl]-4-carboxylate**

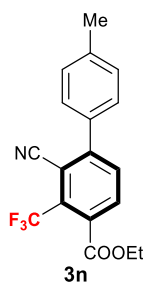

Prepared according to the general procedure using ethyl (*E*)-4-cyano-3-(trifluoromethyl)but-3-enoate (41.4 mg, 0.2 mmol) and trans-4-methylcinnamaldehyde (43.9 mg, 0.3 mmol). Purification of the crude product *via* column chromatography delivered **3n** as a white solid with 81% yield (53.7 mg). m.p. 62-64 °C.

*NMR and HRMS data for the product 3n:*

**<sup>1</sup>H NMR (400 MHz, CDCl<sub>3</sub>):** δ = 7.78 (d, *J* = 8.0 Hz, 1H), 7.71 (d, *J* = 8.0 Hz, 1H), 7.43-7.41 (m, 2H), 7.34-7.32 (m, 2H), 4.43 (q, *J* = 7.2 Hz, 2H), 2.43 (s, 3H), 1.40 (t, *J* = 7.2 Hz, 3H) ppm.

**<sup>13</sup>C NMR (100 MHz, CDCl<sub>3</sub>):** δ = 166.5, 149.8, 140.0, 133.7, 133.3, 132.7 (d, *J* = 2.0 Hz), 132.1, 131.1 (d, *J* = 32.0 Hz), 129.6, 129.0, 122.1 (d, *J* = 274.0 Hz), 114.7, 110.1 (d, *J* = 3.0 Hz), 62.9, 21.3, 13.9 ppm.

**HRMS (ESI):** m/z calculated for C<sub>18</sub>H<sub>14</sub>F<sub>3</sub>NO<sub>2</sub>+Na 356.0874, found 356.0877.

**ethyl 2-cyano-2'-methoxy-3-(trifluoromethyl)-[1,1'-biphenyl]-4-carboxylate**

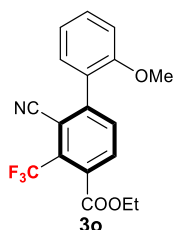

Prepared according to the general procedure using ethyl (*E*)-4-cyano-3-(trifluoromethyl)but-3-enoate (41.4 mg, 0.2 mmol) and 2-methoxycinnamaldehyde (48.7 mg, 0.3 mmol). Purification of the crude product *via* column chromatography delivered **3o** as a white solid with 79% yield (55.4 mg). m.p. 86-87 °C.

*NMR and HRMS data for the product 3o:*

**<sup>1</sup>H NMR (400 MHz, CDCl<sub>3</sub>):** δ = 7.77 (d, *J* = 8.0 Hz, 1H), 7.67 (d, *J* = 8.0 Hz, 1H), 7.47 (td, *J* = 8.4, 1.6 Hz, 1H), 7.23 (dd, *J* = 7.6, 1.6 Hz, 1H), 7.10-7.03 (m, 2H), 4.43 (q, *J* = 7.2 Hz, 2H), 3.83 (s, 3H), 1.40 (t, *J* = 7.2 Hz, 3H) ppm.

**<sup>13</sup>C NMR (100 MHz, CDCl<sub>3</sub>):** δ = 166.6, 156.4, 147.1, 134.2, 132.6 (d, *J* = 2.0 Hz), 131.9, 131.4, 130.6, 130.5 (d, *J* = 33.0 Hz), 125.7, 122.2 (d, *J* = 274.0 Hz), 120.9, 114.4,



112.3 (d,  $J = 2.0$  Hz), 111.5, 62.8, 55.5, 13.9 ppm.

**HRMS (ESI):**  $m/z$  calculated for  $C_{18}H_{14}F_3NO_3+Na$  372.0823, found 372.0825.

**ethyl 2-cyano-4'-methoxy-3-(trifluoromethyl)-[1,1'-biphenyl]-4-carboxylate**

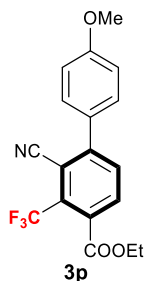

Prepared according to the general procedure using ethyl (*E*)-4-cyano-3-(trifluoromethyl)but-3-enoate (41.4 mg, 0.2 mmol) and 4-methoxycinnamaldehyde (48.7 mg, 0.3 mmol). Purification of the crude product *via* column chromatography delivered **3p** as a white solid with 83% yield (57.8 mg). m.p. 101-103 °C.

*NMR and HRMS data for the product 3p:*

**$^1H$  NMR (400 MHz,  $CDCl_3$ ):**  $\delta$  = 7.76 (d,  $J = 8.0$  Hz, 1H), 7.70 (d,  $J = 8.4$  Hz, 1H), 7.50-7.46 (m, 2H), 7.06-7.02 (m, 2H), 4.42 (q,  $J = 7.2$  Hz, 2H), 3.88 (s, 3H), 1.40 (t,  $J = 7.2$  Hz, 3H) ppm.

**$^{13}C$  NMR (100 MHz,  $CDCl_3$ ):**  $\delta$  = 166.5, 160.9, 149.5, 133.3, 132.4 (d,  $J = 3.0$  Hz), 132.1, 131.2 (d,  $J = 32.0$  Hz), 130.4, 128.8, 122.1 (d,  $J = 274.0$  Hz), 114.8, 114.4, 109.9 (d,  $J = 2.0$  Hz), 62.9, 55.4, 13.9 ppm.

**HRMS (ESI):**  $m/z$  calculated for  $C_{18}H_{14}F_3NO_3+Na$  372.0823, found 372.0821.

**ethyl 2,4'-dichloro-2-cyano-3-(trifluoromethyl)-[1,1'-biphenyl]-4-carboxylate**

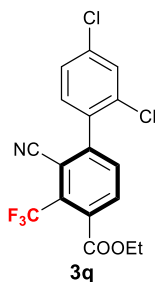

Prepared according to the general procedure using ethyl (*E*)-4-cyano-3-

(trifluoromethyl)but-3-enoate (41.4 mg, 0.2 mmol) and 3-(2,4-dichlorophenyl)acrylaldehyde (60.3 mg, 0.3 mmol). Purification of the crude product *via* column chromatography delivered **3q** as a white solid with 76% yield (59.1 mg). m.p. 110-112 °C.

*NMR and HRMS data for the product 3q:*

**<sup>1</sup>H NMR (400 MHz, CDCl<sub>3</sub>):** δ = 7.84 (d, *J* = 8.0 Hz, 1H), 7.67 (d, *J* = 8.0 Hz, 1H), 7.59 (d, *J* = 2.0 Hz, 1H), 7.42 (dd, *J* = 8.4, 2.0 Hz, 1H), 7.29 (d, *J* = 8.0 Hz, 1H), 4.45 (q, *J* = 7.2 Hz, 2H), 1.41 (t, *J* = 7.2 Hz, 3H) ppm.

**<sup>13</sup>C NMR (100 MHz, CDCl<sub>3</sub>):** δ = 166.1, 146.1, 136.7, 133.9, 133.9, 133.7, 133.3 (d, *J* = 3.0 Hz), 132.2, 131.6, 130.9 (d, *J* = 33.0 Hz), 130.2, 127.7, 121.9 (d, *J* = 274.0 Hz), 113.6, 112.0 (d, *J* = 2.0 Hz), 63.1, 13.9 ppm.

**HRMS (ESI):** *m/z* calculated for C<sub>17</sub>H<sub>10</sub>Cl<sub>2</sub>F<sub>3</sub>NO<sub>2</sub>+Na 409.9938, found 409.9937.

**ethyl 2',5'-dichloro-2-cyano-3-(trifluoromethyl)-[1,1'-biphenyl]-4-carboxylate**

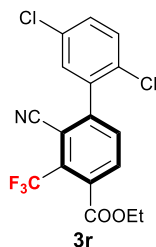

Prepared according to the general procedure using ethyl (*E*)-4-cyano-3-(trifluoromethyl)but-3-enoate (41.4 mg, 0.2 mmol) and 3-(2,5-dichlorophenyl)acrylaldehyde (60.3 mg, 0.3 mmol). Purification of the crude product *via* column chromatography delivered **3r** as a white solid with 74% yield (57.2 mg). m.p. 134-136 °C.

*NMR and HRMS data for the product 3r:*

**<sup>1</sup>H NMR (400 MHz, CDCl<sub>3</sub>):** δ = 7.85 (dd, *J* = 8.0, 0.4 Hz, 1H), 7.66 (d, *J* = 8.0 Hz, 1H), 7.50 (d, *J* = 8.8 Hz, 1H), 7.44 (dd, *J* = 8.4, 2.4 Hz, 1H), 7.32 (d, *J* = 2.8 Hz, 1H), 4.45 (q, *J* = 7.2 Hz, 2H), 1.42 (t, *J* = 7.2 Hz, 3H) ppm.

**<sup>13</sup>C NMR (100 MHz, CDCl<sub>3</sub>):** δ = 166.0, 145.8, 136.8, 134.0 (q, *J* = 3.0 Hz), 133.7, 133.2, 132.3, 131.3, 131.2, 130.9 (d, *J* = 33.0 Hz), 130.6, 121.9 (d, *J* = 274.0 Hz), 113.4, 112.0 (d, *J* = 2.0 Hz), 63.1, 13.9 ppm.

**HRMS (ESI):** *m/z* calculated for C<sub>17</sub>H<sub>10</sub>Cl<sub>2</sub>F<sub>3</sub>NO<sub>2</sub>+Na 409.9938, found 409.9940.

**ethyl 3',4'-dichloro-2-cyano-3-(trifluoromethyl)-[1,1'-biphenyl]-4-carboxylate**

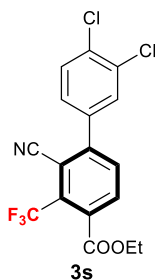

Prepared according to the general procedure using ethyl (*E*)-4-cyano-3-(trifluoromethyl)but-3-enoate (41.4 mg, 0.2 mmol) and 3-(3,4-dichlorophenyl)acrylaldehyde (60.3 mg, 0.3 mmol). Purification of the crude product *via* column chromatography delivered **3s** as a white solid with 77% yield (59.6 mg). m.p. 118-120 °C.

*NMR and HRMS data for the product 3s:*

**<sup>1</sup>H NMR (400 MHz, CDCl<sub>3</sub>):** δ = 7.83 (d, *J* = 8.0 Hz, 1H), 7.70 (d, *J* = 8.0 Hz, 1H), 7.63-7.59 (m, 2H), 7.39 (dd, *J* = 8.4, 2.4 Hz, 1H), 4.44 (q, *J* = 7.2 Hz, 2H), 1.40 (t, *J* = 7.2 Hz, 3H) ppm.

**<sup>13</sup>C NMR (100 MHz, CDCl<sub>3</sub>):** δ = 166.1, 147.0, 136.2, 134.6, 133.7 (d, *J* = 2.0 Hz), 133.4, 133.1, 132.5, 131.4 (d, *J* = 33.0 Hz), 131.02, 130.8, 128.2, 121.9 (d, *J* = 274.0 Hz), 114.0, 110.4 (d, *J* = 2.0 Hz), 63.1, 13.9 ppm.

**HRMS (ESI):** *m/z* calculated for C<sub>17</sub>H<sub>10</sub>Cl<sub>2</sub>F<sub>3</sub>NO<sub>2</sub>+Na 409.9938, found 409.9941.

**ethyl 2'-chloro-2-cyano-5'-fluoro-3-(trifluoromethyl)-[1,1'-biphenyl]-4-carboxylate**

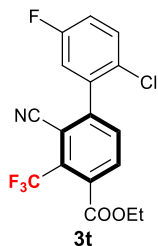

Prepared according to the general procedure using ethyl (*E*)-4-cyano-3-(trifluoromethyl)but-3-enoate (41.4 mg, 0.2 mmol) and 3-(2-chloro-4-fluorophenyl)acrylaldehyde (55.4 mg, 0.3 mmol). Purification of the crude product *via* column chromatography delivered **3t** as a white solid with 75% yield (55.4 mg). m.p. 65-67 °C.

*NMR and HRMS data for the product 3t:*

**<sup>1</sup>H NMR (400 MHz, CDCl<sub>3</sub>):** δ = 7.85 (dd, *J* = 8.0, 0.4 Hz, 1H), 7.67 (d, *J* = 8.0 Hz, 1H), 7.53 (dd, *J* = 8.8, 4.8 Hz, 1H), 7.18 (ddd, *J* = 8.8, 7.6, 3.2 Hz, 1H), 7.08 (dd, *J* = 8.0, 2.8 Hz, 1H), 4.45 (q, *J* = 7.2 Hz, 2H), 1.41 (t, *J* = 7.2 Hz, 3H) ppm.

**<sup>13</sup>C NMR (100 MHz, CDCl<sub>3</sub>):** δ = 166.1, 161.0 (d, *J* = 248.0 Hz), 146.0, 136.9 (d, *J* = 8.0 Hz), 134.0 (q, *J* = 2.0 Hz), 133.7, 132.3, 131.7 (d, *J* = 8.0 Hz), 130.9 (d, *J* = 33.0 Hz), 128.1 (d, *J* = 4.0 Hz), 121.9 (q, *J* = 274.0 Hz), 118.3 (d, *J* = 23.0 Hz), 118.0 (d, *J* = 24.0 Hz), 113.4, 111.9 (d, *J* = 2.0 Hz), 63.1, 13.9 ppm.

**HRMS (ESI):** *m/z* calculated for C<sub>17</sub>H<sub>10</sub>ClF<sub>4</sub>NO<sub>2</sub>+Na 394.0234, found 394.0235.

**ethyl 2'-bromo-4'-chloro-2-cyano-3-(trifluoromethyl)-[1,1'-biphenyl]-4-carboxylate**

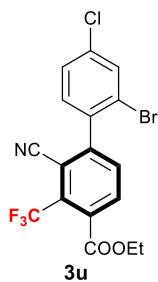

Prepared according to the general procedure using ethyl (*E*)-4-cyano-3-(trifluoromethyl)but-3-enoate (41.4 mg, 0.2 mmol) and 3-(2-bromo-4-

chlorophenyl)acrylaldehyde (73.7 mg, 0.3 mmol). Purification of the crude product *via* column chromatography delivered **3u** as a white solid with 73% yield (62.8 mg). m.p. 102-104 °C.

*NMR and HRMS data for the product 3u:*

**<sup>1</sup>H NMR (400 MHz, CDCl<sub>3</sub>):** δ = 7.84 (dd, *J* = 8.0, 0.4 Hz, 1H), 7.77 (d, *J* = 2.0 Hz, 1H), 7.65 (d, *J* = 8.0 Hz, 1H), 7.46 (dd, *J* = 8.0, 2.0 Hz, 1H), 7.27 (d, *J* = 7.6 Hz, 1H), 4.45 (q, *J* = 7.2 Hz, 2H), 1.41 (t, *J* = 7.2 Hz, 3H) ppm.

**<sup>13</sup>C NMR (100 MHz, CDCl<sub>3</sub>):** δ = 166.1, 147.7, 136.6, 136.0, 133.9, 133.2, 132.2, 131.4, 130.8 (d, *J* = 33.0 Hz), 128.3, 126.0 (d, *J* = 4.0 Hz), 123.1, 121.9 (d, *J* = 275.0 Hz), 113.5, 111.9 (d, *J* = 2.0 Hz), 63.1, 13.9 ppm.

**HRMS (ESI):** *m/z* calculated for C<sub>17</sub>H<sub>10</sub>BrClF<sub>3</sub>NO<sub>2</sub>+Na 453.9433, found 453.9435.

**ethyl 2'-bromo-5'-chloro-2-cyano-3-(trifluoromethyl)-[1,1'-biphenyl]-4-carboxylate**

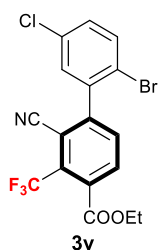

Prepared according to the general procedure using ethyl (*E*)-4-cyano-3-(trifluoromethyl)but-3-enoate (41.4 mg, 0.2 mmol) and 3-(2-bromo-5-chlorophenyl)acrylaldehyde (73.7 mg, 0.3 mmol). Purification of the crude product *via* column chromatography delivered **3v** as a white solid with 72% yield (62.3 mg). m.p. 156-158 °C.

*NMR and HRMS data for the product 3v:*

**<sup>1</sup>H NMR (400 MHz, CDCl<sub>3</sub>):** δ = 7.85 (dd, *J* = 8.0, 0.4 Hz, 1H), 7.67 (d, *J* = 8.4 Hz, 1H), 7.64 (d, *J* = 8.0 Hz, 1H), 7.36 (dd, *J* = 8.4, 2.8 Hz, 1H), 7.32 (d, *J* = 2.8 Hz, 1H), 4.45 (q, *J* = 7.2 Hz, 2H), 1.42 (t, *J* = 7.2 Hz, 3H) ppm.

**<sup>13</sup>C NMR (100 MHz, CDCl<sub>3</sub>):**  $\delta$  = 166.1, 147.4, 138.9, 134.5, 134.0 (d,  $J$  = 3.0 Hz), 134.0, 133.6, 132.3, 131.3, 130.8 (d,  $J$  = 33.0 Hz), 130.6, 121.9 (d,  $J$  = 274.0 Hz), 120.6, 113.4, 111.9 (d,  $J$  = 2.0 Hz), 63.1, 13.9 ppm.

**HRMS (ESI):**  $m/z$  calculated for C<sub>17</sub>H<sub>10</sub>BrClF<sub>3</sub>NO<sub>2</sub>+Na 453.9433, found 453.9431.

**ethyl 4'-bromo-2-cyano-2'-fluoro-3-(trifluoromethyl)-[1,1'-biphenyl]-4-carboxylate**

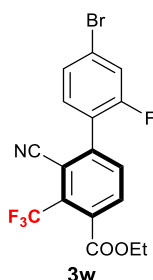

Prepared according to the general procedure using ethyl (*E*)-4-cyano-3-(trifluoromethyl)but-3-enoate (41.4 mg, 0.2 mmol) and 3-(4-bromo-2-fluorophenyl)acrylaldehyde (68.7 mg, 0.3 mmol). Purification of the crude product *via* column chromatography delivered **3w** as a white solid with 70% yield (58.1 mg). m.p. 98-100 °C.

*NMR and HRMS data for the product 3w:*

**<sup>1</sup>H NMR (400 MHz, CDCl<sub>3</sub>):**  $\delta$  = 7.84 (d,  $J$  = 8.0 Hz, 1H), 7.71 (d,  $J$  = 8.0 Hz, 1H), 7.49-7.45 (m, 2H), 7.31-7.27 (m, 1H), 4.44 (q,  $J$  = 7.2 Hz, 2H), 1.41 (t,  $J$  = 7.2 Hz, 3H) ppm.

**<sup>13</sup>C NMR (100 MHz, CDCl<sub>3</sub>):**  $\delta$  = 166.1, 159.1 (d,  $J$  = 253.0 Hz), 142.7, 134.0, 133.9 (q,  $J$  = 2.0 Hz), 132.3, 132.0 (d,  $J$  = 3.0 Hz), 131.1 (d,  $J$  = 33.0 Hz), 128.2 (d,  $J$  = 3.0 Hz), 124.9 (d,  $J$  = 9.0 Hz), 123.4, 121.9 (q,  $J$  = 274.0 Hz), 120.2 (d,  $J$  = 25.0 Hz), 113.8, 111.7 (d,  $J$  = 1.0 Hz), 63.1, 13.9 ppm.

**HRMS (ESI):**  $m/z$  calculated for C<sub>17</sub>H<sub>10</sub>BrF<sub>4</sub>NO<sub>2</sub>+Na 437.9729, found 437.9727.

**ethyl 5'-bromo-2-cyano-2'-fluoro-3-(trifluoromethyl)-[1,1'-biphenyl]-4-carboxylate**

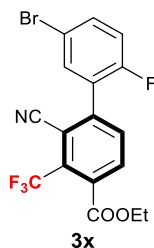

Prepared according to the general procedure using ethyl (*E*)-4-cyano-3-(trifluoromethyl)but-3-enoate (41.4 mg, 0.2 mmol) and 3-(5-bromo-2-fluorophenyl)acrylaldehyde (68.7 mg, 0.3 mmol). Purification of the crude product *via* column chromatography delivered **3x** as a white solid with 71% yield (58.7 mg). m.p. 74-76 °C.

*NMR and HRMS data for the product 3x:*

**<sup>1</sup>H NMR (400 MHz, CDCl<sub>3</sub>):** δ = 7.85 (dd, *J* = 8.0, 0.4 Hz, 1H), 7.71 (d, *J* = 8.0 Hz, 1H), 7.62 (ddd, *J* = 7.6, 4.8, 2.8 Hz, 1H), 7.52 (dd, *J* = 6.4, 2.4 Hz, 1H), 7.16 (t, *J* = 8.8 Hz, 1H), 4.44 (q, *J* = 7.2 Hz, 2H), 1.41 (t, *J* = 7.2 Hz, 3H) ppm.

**<sup>13</sup>C NMR (100 MHz, CDCl<sub>3</sub>):** δ = 166.0, 158.5 (d, *J* = 249 Hz), 142.3, 134.9 (d, *J* = 8.0 Hz), 134.1 (q, *J* = 3.0 Hz), 133.9, 13.6 (d, *J* = 2.0 Hz), 132.4, 131.1 (d, *J* = 33.0 Hz), 126.3 (d, *J* = 16.0 Hz), 121.9 (d, *J* = 275.0 Hz), 118.2 (d, *J* = 23.0 Hz), 117.1 (d, *J* = 3.0 Hz), 113.6, 111.9 (d, *J* = 1.0 Hz), 63.1, 13.9 ppm.

**HRMS (ESI):** *m/z* calculated for C<sub>17</sub>H<sub>10</sub>BrF<sub>4</sub>NO<sub>2</sub>+Na 437.9729, found 437.9730.

**ethyl 2-cyano-3',4'-dimethoxy-3-(trifluoromethyl)-[1,1'-biphenyl]-4-carboxylate**

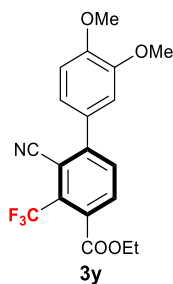

Prepared according to the general procedure using ethyl (*E*)-4-cyano-3-(trifluoromethyl)but-3-enoate (41.4 mg, 0.2 mmol) and 3-(3,4-dimethoxyphenyl)acrylaldehyde (57.7 mg, 0.3 mmol). Purification of the crude product

via column chromatography delivered **3y** as a white solid with 79% yield (60.2 mg). m.p. 128-130 °C.

*NMR and HRMS data for the product 3y:*

**<sup>1</sup>H NMR (400 MHz, CDCl<sub>3</sub>):** δ = 7.75 (q, *J* = 8.4 Hz, 2H), 7.11-7.05 (m, 2H), 7.00 (d, *J* = 8.0 Hz, 1H), 4.43 (q, *J* = 7.2 Hz, 2H), 3.95 (d, *J* = 2.0 Hz, 6H), 1.41 (t, *J* = 7.2 Hz, 3H) ppm.

**<sup>13</sup>C NMR (100 MHz, CDCl<sub>3</sub>):** δ = 166.5, 150.4, 149.5, 149.1, 133.3, 132.5, 132.1, 131.2 (d, *J* = 32.0 Hz), 129.0, 122.1 (d, *J* = 274.0 Hz), 122.0, 114.8, 112.2, 111.4, 110.0 (d, *J* = 2.0 Hz), 62.9, 56.2, 56.0, 13.9 ppm.

**HRMS (ESI):** calcd. For C<sub>19</sub>H<sub>16</sub>F<sub>3</sub>NO<sub>4</sub>+Na 402.0929, found 402.0926.

**ethyl 3-cyano-4-(furan-2-yl)-2-(trifluoromethyl)benzoate**

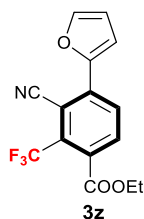

Prepared according to the general procedure using ethyl (*E*)-4-cyano-3-(trifluoromethyl)but-3-enoate (41.4 mg, 0.2 mmol) and 3-(furan-2-yl)acrylaldehyde (36.6 mg, 0.3 mmol). Purification of the crude product *via* column chromatography delivered **3z** as a white solid with 67% yield (41.4 mg). m.p. 86-87 °C.

*NMR and HRMS data for the product 3z:*

**<sup>1</sup>H NMR (400 MHz, CDCl<sub>3</sub>):** δ = 8.15 (d, *J* = 8.4 Hz, 1H), 7.76 (d, *J* = 8.4 Hz, 1H), 7.63 (d, *J* = 0.4 Hz, 1H), 7.58 (d, *J* = 3.6 Hz, 1H), 6.63 (dd, *J* = 3.6, 1.2 Hz, 1H), 4.41 (q, *J* = 7.2 Hz, 2H), 1.39 (t, *J* = 7.2 Hz, 3H) ppm.

**<sup>13</sup>C NMR (100 MHz, CDCl<sub>3</sub>):** δ = 166.4, 147.8, 144.7, 136.8, 132.4, 129.1, 122.1 (d, *J* = 274.0 Hz), 115.0, 113.8, 112.9, 111.7, 110.5, 105.0 (d, *J* = 2.0 Hz), 62.9, 13.9 ppm.

**HRMS (ESI):** calcd. For C<sub>15</sub>H<sub>10</sub>F<sub>3</sub>NO<sub>3</sub>+Na 332.0510, found 332.0515.



**ethyl 3-cyano-4-(naphthalen-1-yl)-2-(trifluoromethyl)benzoate**

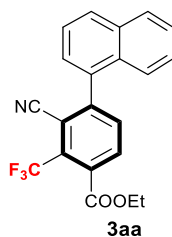

Prepared according to the general procedure using ethyl (*E*)-4-cyano-3-(trifluoromethyl)but-3-enoate (41.4 mg, 0.2 mmol) and 3-(naphthalen-1-yl)acrylaldehyde (54.7 mg, 0.3 mmol). Purification of the crude product *via* column chromatography delivered **3aa** as a white solid with 71% yield (52.6 mg). m.p. 99-101 °C.

*NMR and HRMS data for the product 3aa:*

**<sup>1</sup>H NMR (400 MHz, CDCl<sub>3</sub>):** δ = 8.00 (d, *J* = 8.0 Hz, 1H), 7.95 (d, *J* = 8.0 Hz, 1H), 7.86 (d, *J* = 8.0 Hz, 1H), 7.77 (d, *J* = 8.0 Hz, 1H), 7.61-7.53 (m, 2H), 7.50-7.45 (m, 2H), 7.39 (d, *J* = 8.4 Hz, 1H), 4.47 (q, *J* = 7.2 Hz, 2H), 1.43 (t, *J* = 7.2 Hz, 3H) ppm.

**<sup>13</sup>C NMR (100 MHz, CDCl<sub>3</sub>):** δ = 166.4, 148.8, 134.7, 134.1, 133.7, 133.3 (d, *J* = 2.0 Hz), 131.8, 131.0, 130.9 (d, *J* = 32.0 Hz), 130.2, 128.8, 127.7, 127.2, 126.5, 125.2, 124.6, 122.1 (d, *J* = 274.0 Hz), 113.9, 112.3 (d, *J* = 2.0 Hz), 63.0, 13.9 ppm.

**HRMS (ESI):** m/z calculated for C<sub>21</sub>H<sub>14</sub>F<sub>3</sub>NO<sub>2</sub>+Na 392.0874, found 392.0876.

**ethyl 3-cyano-4-(naphthalen-2-yl)-2-(trifluoromethyl)benzoate**

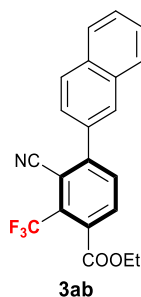

Prepared according to the general procedure using ethyl (*E*)-4-cyano-3-(trifluoromethyl)but-3-enoate (41.4 mg, 0.2 mmol) and 3-(naphthalen-2-yl)acrylaldehyde (54.7 mg, 0.3 mmol). Purification of the crude product *via* column

chromatography delivered **3ab** as a white solid with 73% yield (53.8 mg). m.p. 110-111 °C.

*NMR and HRMS data for the product 3ab:*

**<sup>1</sup>H NMR (400 MHz, CDCl<sub>3</sub>):** δ = 7.99 (d, *J* = 8.8 Hz, 2H), 7.92 (dd, *J* = 8.8, 5.2 Hz, 2H), 7.85-7.80 (m, 2H), 7.62-7.55 (m, 2H), 4.45 (q, *J* = 7.2 Hz, 2H), 1.41 (t, *J* = 7.2 Hz, 3H) ppm.

**<sup>13</sup>C NMR (100 MHz, CDCl<sub>3</sub>):** δ = 166.4, 149.8, 133.9, 133.6, 133.5, 133.0, 133.0 (d, *J* = 3.0 Hz), 132.2, 131.3 (d, *J* = 32.0 Hz), 128.9, 128.9, 128.5, 127.8, 127.4, 127.0, 125.9, 122.1 (d, *J* = 274.0 Hz), 114.6, 110.5 (d, *J* = 2.0 Hz), 63.0, 13.9 ppm.

**HRMS (ESI):** m/z calculated for C<sub>21</sub>H<sub>14</sub>F<sub>3</sub>NO<sub>2</sub>+Na 392.0874, found 392.0871.

**ethyl 3-cyano-4-(2-methoxynaphthalen-1-yl)-2-(trifluoromethyl)benzoate**

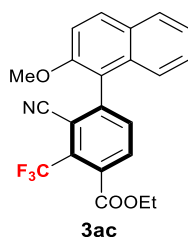

Prepared according to the general procedure using ethyl (*E*)-4-cyano-3-(trifluoromethyl)but-3-enoate (41.4 mg, 0.2 mmol) and 3-(2-methoxynaphthalen-1-yl)acrylaldehyde (63.7 mg, 0.3 mmol). Purification of the crude product *via* column chromatography delivered **3ac** as a white solid with 64% yield (50.9 mg). m.p. 148-149°C.

*NMR and HRMS data for the product 3ac:*

**<sup>1</sup>H NMR (400 MHz, CDCl<sub>3</sub>):** δ = 8.01 (d, *J* = 9.0 Hz, 1H), 7.88-7.56 (m, 2H), 7.70 (d, *J* = 7.8 Hz, 1H), 7.42-7.37 (m, 3H), 7.17 (d, *J* = 7.8 Hz, 1H), 4.47 (q, *J* = 7.2 Hz, 2H), 3.92 (s, 3H), 1.44 (t, *J* = 7.2 Hz, 3H) ppm.

**<sup>13</sup>C NMR (100 MHz, CDCl<sub>3</sub>):** δ = 166.7, 154.2, 145.6, 135.5, 132.9, 132.4, 132.0, 131.8, 130.8 (d, *J* = 22.0 Hz), 128.9, 128.5, 127.6, 124.0, 123.3, 122.2 (d, *J* = 282.0 Hz), 118.8, 114.2, 113.7, 112.9, 62.9, 56.4, 13.9 ppm.

**HRMS (ESI):** m/z calculated for C<sub>22</sub>H<sub>16</sub>F<sub>3</sub>NO<sub>3</sub>+Na 422.0980, found 422.0982.

**methyl 2-cyano-4'-methoxy-3-(trifluoromethyl)-[1,1'-biphenyl]-4-carboxylate**

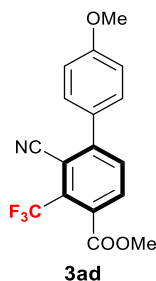

Prepared according to the general procedure using methyl (*E*)-4-cyano-3-(trifluoromethyl)but-3-enoate (38.6 mg, 0.2 mmol) and 4-methoxycinnamaldehyde (48.7 mg, 0.3 mmol). Purification of the crude product *via* column chromatography delivered **3ad** as a white solid with 74% yield (49.7 mg). m.p. 127-128 °C.

*NMR and HRMS data for the product 3ad:*

**<sup>1</sup>H NMR (400 MHz, CDCl<sub>3</sub>):** δ = 7.76 (d, *J* = 8.0 Hz, 1H), 7.70 (d, *J* = 8.0 Hz, 1H), 7.49-7.47 (m, 2H), 7.05-7.03 (m, 2H), 3.97 (s, 3H), 3.88 (s, 3H) ppm.

**<sup>13</sup>C NMR (100 MHz, CDCl<sub>3</sub>):** δ = 166.1, 160.8, 149.4, 133.2, 132.9 (d, *J* = 3.0 Hz), 132.1, 131.0 (d, *J* = 33.0 Hz) 130.4, 128.8, 122.2 (d, *J* = 274.0 Hz), 114.8, 114.4, 109.9 (d, *J* = 2.0 Hz), 71.0, 55.4, 21.5 ppm.

**HRMS (ESI):** m/z calculated for C<sub>17</sub>H<sub>12</sub>F<sub>3</sub>NO<sub>3</sub>+Na 358.0667, found 358.0665.

**isopropyl 2-cyano-4'-methoxy-3-(trifluoromethyl)-[1,1'-biphenyl]-4-carboxylate**

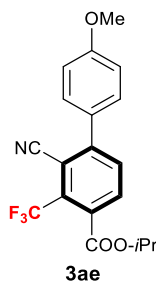

Prepared according to the general procedure using isopropyl (*E*)-4-cyano-3-(trifluoromethyl)but-3-enoate (44.2 mg, 0.2 mmol) and 4-methoxycinnamaldehyde (48.7 mg, 0.3 mmol). Purification of the crude product *via* column chromatography

delivered **3ae** as a white solid with 72% yield (52.1 mg). m.p. 82-83 °C.

*NMR and HRMS data for the product 3ae:*

**<sup>1</sup>H NMR (400 MHz, CDCl<sub>3</sub>):** δ = 7.75 (d, *J* = 8.4 Hz, 1H), 7.69 (d, *J* = 8.0 Hz, 1H), 7.49-7.46 (m, 2H), 7.06-7.02 (m, 2H), 5.31-5.25 (m, 1H), 3.88 (s, 3H), 1.38 (d, *J* = 6.4 Hz, 6H) ppm.

**<sup>13</sup>C NMR (100 MHz, CDCl<sub>3</sub>):** δ = 166.1, 160.8, 149.4, 133.2, 132.9 (d, *J* = 2.0 Hz), 132.1, 131.0 (d, *J* = 32.0 Hz), 130.4, 128.8, 122.2 (d, *J* = 274.0 Hz), 114.8, 114.4, 109.9 (d, *J* = 2.0 Hz), 71.0, 55.4, 21.5 ppm.

**HRMS (ESI):** m/z calculated for C<sub>19</sub>H<sub>16</sub>F<sub>3</sub>NO<sub>3</sub>+Na 386.0980, found 386.0975.

**benzyl 2-cyano-3-(trifluoromethyl)-[1,1'-biphenyl]-4-carboxylate**

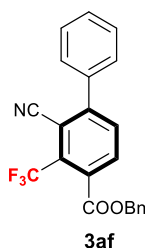

Prepared according to the general procedure using benzyl (*E*)-4-cyano-3-(trifluoromethyl)but-3-enoate (53.8 mg, 0.2 mmol) and cinnamaldehyde (39.7 mg, 0.3 mmol). Purification of the crude product *via* column chromatography delivered **3af** as a white solid with 73% yield (55.7 mg). m.p. 91-93 °C.

*NMR and HRMS data for the product 3af:*

**<sup>1</sup>H NMR (600 MHz, CDCl<sub>3</sub>):** δ = 7.79 (d, *J* = 7.8 Hz, 1H), 7.71 (d, *J* = 7.8 Hz, 1H), 7.53-7.49 (m, 5H), 7.44-7.36 (m, 5H), 5.38 (s, 2H) ppm.

**<sup>13</sup>C NMR (150 MHz, CDCl<sub>3</sub>):** δ = 166.2, 149.9, 136.5, 134.5, 133.4, 132.5, 132.2, 131.2 (q, *J* = 31.5 Hz), 129.8, 128.9, 128.8, 128.74, 128.71, 122.0 (d, *J* = 274.5 Hz), 114.4, 110.3, 68.7 ppm.

**HRMS (ESI):** m/z calculated for C<sub>22</sub>H<sub>14</sub>F<sub>3</sub>O<sub>2</sub>+Na 404.0874, found 404.0870.

**ethyl 2-cyano-3-(difluoro- $\lambda^3$ -methyl)-4'-methoxy-[1,1'-biphenyl]-4-carboxylate**

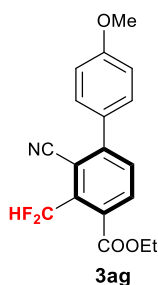

Prepared according to the general procedure using ethyl (*E*)-4-cyano-3-(difluoro- $\lambda^3$ -methyl)but-3-enoate (37.8 mg, 0.2 mmol) and 4-methoxycinnamaldehyde (48.7 mg, 0.3 mmol). Purification of the crude product via column chromatography delivered **3ag** as a white solid with 78% yield (51.7 mg). m.p. 103-105 °C.

*NMR and HRMS data for the product 3ag:*

**<sup>1</sup>H NMR (600 MHz, CDCl<sub>3</sub>):**  $\delta$  = 8.11 (d, *J* = 8.4 Hz, 1H), 7.64 (t, *J* = 53.4 Hz, 1H), 7.64 (d, *J* = 8.4 Hz, 1H), 7.52-7.49 (m, 2H), 7.05-7.03 (m, 2H), 4.45 (q, *J* = 7.2 Hz, 2H), 3.88 (s, 3H), 1.43 (t, *J* = 7.2 Hz, 3H) ppm.

**<sup>13</sup>C NMR (150 MHz, CDCl<sub>3</sub>):**  $\delta$  = 165.1, 160.8, 150.6, 137.9 (t, *J* = 22.5 Hz), 133.7, 132.0, 130.4, 129.7 (d, *J* = 3.0 Hz), 129.0, 115.5, 114.4, 110.83 (t, *J* = 238.5 Hz), 110.3, 62.6, 55.4, 14.1 ppm.

**<sup>19</sup>F NMR (564 MHz, CDCl<sub>3</sub>):**  $\delta$  = -110.24 (d, *J* = 50.76 Hz, 2F).

**HRMS (ESI):** *m/z* calculated for C<sub>18</sub>H<sub>15</sub>F<sub>2</sub>NO<sub>3</sub>+Na 354.0918, found 354.0915.

**ethyl 2-cyano-4'-methoxy-3-(perfluoroethyl)-[1,1'-biphenyl]-4-carboxylate**

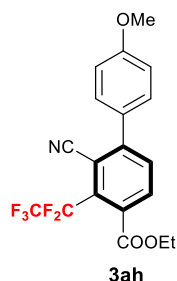

Prepared according to the general procedure using ethyl (*E*)-3-(cyanomethylene)-4,4,5,5,5-pentafluoropentanoate (51.4 mg, 0.2 mmol) and 4-methoxycinnamaldehyde (48.7 mg, 0.3 mmol). Purification of the crude product *via* column chromatography delivered **3ah** as a white solid with 66% yield (53.1 mg). m.p. 118-120 °C.

*NMR and HRMS data for the product 3ah:*

**<sup>1</sup>H NMR (600 MHz, CDCl<sub>3</sub>):**  $\delta$  = 7.72-7.69 (m, 2H), 7.46-7.44 (m, 2H), 7.03-7.02 (m, 2H), 4.41 (q,  $J$  = 7.2 Hz, 2H), 3.87 (s, 3H), 1.37 (t,  $J$  = 7.2 Hz, 3H) ppm.

**<sup>13</sup>C NMR (150 MHz, CDCl<sub>3</sub>):**  $\delta$  = 166.7, 160.8, 149.9, 134.3 (t,  $J$  = 4.5 Hz), 133.7, 132.2, 130.5, 128.8, 128.7 (t,  $J$  = 22.5 Hz), 118.9 (d,  $J$  = 286.5 Hz), 114.9, 114.4, 113.1 (d,  $J$  = 40.5 Hz), 111.1, 62.8, 55.4, 13.8 ppm.

**<sup>19</sup>F NMR (564 MHz, CDCl<sub>3</sub>):**  $\delta$  = -81.0 (s, 3F), -105.2 (s, 2F).

**HRMS (ESI):**  $m/z$  calculated for C<sub>19</sub>H<sub>14</sub>F<sub>5</sub>NO<sub>3</sub>+Na 422.0792, found 422.0788.

## 2.2 Procedure for 5

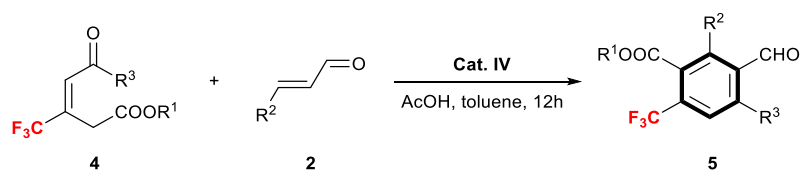

The reaction was carried out with **4** (0.20 mmol) and **2** (0.30 mmol), amine catalyst **IV** (0.05 mmol) and AcOH (0.08 mmol) in toluene (2 mL) under an open atmosphere at 70 °C for 12 h. Then the reaction mixture was concentrated and the residue was purified by flash chromatography on silica gel (petroleum ether/ethyl acetate = 100:1) to give the final CF<sub>3</sub>-functionlized penta-substuted benzenes **5**, which was further analyzed by <sup>1</sup>H NMR, <sup>13</sup>C HMR, HRMS analysis.

### ethyl 2'-formyl-5'-(trifluoromethyl)-[1,1':3',1''-terphenyl]-4'-carboxylate

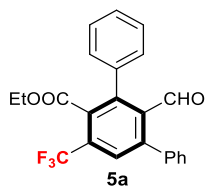

Prepared according to the general procedure using ethyl ethyl (*E*)-5-oxo-5-phenyl-3-(trifluoromethyl)pent-3-enoate (57.3 mg, 0.2 mmol) and cinnamaldehyde (39.7 mg, 0.3 mmol). Purification of the crude product *via* column chromatography delivered **5a** as a white solid with 75% yield (59.4 mg). m.p. 84-86 °C.

*NMR and HRMS data for the product 5a:*

**<sup>1</sup>H NMR (400 MHz, CDCl<sub>3</sub>):** δ = 9.82 (s, 1H), 7.75 (s, 1H), 7.48-7.45 (m, 3H), 7.42-7.40 (m, 3H), 7.35-7.33 (m, 2H), 7.31-7.28 (m, 2H), 4.00 (q, *J* = 7.2 Hz, 2H), 0.99 (t, *J* = 7.2 Hz, 3H) ppm.

**<sup>13</sup>C NMR (100 MHz, CDCl<sub>3</sub>):** δ = 192.0, 165.9, 144.7, 142.1, 137.5, 136.9, 135.1, 133.0 (d, *J* = 2.0 Hz), 129.8, 129.5, 129.4 (d, *J* = 32.0 Hz), 128.7, 128.64, 128.62, 128.1, 128.0 (d, *J* = 4.0 Hz), 122.9 (d, *J* = 273.0 Hz), 62.0, 13.5 ppm.

**HRMS (ESI):** *m/z* calculated for C<sub>23</sub>H<sub>17</sub>F<sub>3</sub>O<sub>3</sub>+Na 421.1027, found 421.1025.

**ethyl 3''-chloro-2'-formyl-5'-(trifluoromethyl)-[1,1':3',1''-terphenyl]-4'-carboxylate**

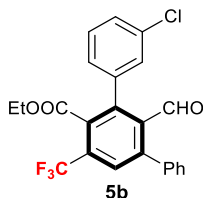

Prepared according to the general procedure using ethyl ethyl (*E*)-5-oxo-5-phenyl-3-(trifluoromethyl)pent-3-enoate (57.3 mg, 0.2 mmol) and 3-chlorocinnamaldehyde (50.0 mg, 0.3 mmol). Purification of the crude product *via* column chromatography delivered **5b** as a white solid with 74% yield (63.7 mg). m.p. 130-132 °C.

*NMR and HRMS data for the product 5b:*

**<sup>1</sup>H NMR (400 MHz, CDCl<sub>3</sub>):** δ = 9.83 (s, 1H), 7.79 (s, 1H), 7.50-7.47 (m, 3H), 7.41-7.38 (m, 1H), 7.36-7.32 (m, 3H), 7.31 (t, *J* = 1.6 Hz, 1H), 7.19-7.17 (m, 1H), 4.06 (q, *J* = 7.2 Hz, 2H), 1.06 (t, *J* = 7.2 Hz, 3H) ppm.

**<sup>13</sup>C NMR (100 MHz, CDCl<sub>3</sub>):** δ = 191.6, 165.6, 145.3, 140.1, 137.1, 136.9, 136.5, 134.0, 133.1 (d, *J* = 2.0 Hz), 129.7, 129.8 (d, *J* = 32.0 Hz), 129.6, 129.3, 129.0, 128.8, 128.7, 128.4 (q, *J* = 5.0 Hz), 128.1, 122.8 (q, *J* = 273.0 Hz), 62.2, 13.6 ppm.

**HRMS (ESI):** *m/z* calculated for C<sub>23</sub>H<sub>16</sub>ClF<sub>3</sub>O<sub>3</sub>+Na 455.0638, found 455.0641.

**ethyl 4''-chloro-2'-formyl-5'-(trifluoromethyl)-[1,1':3',1''-terphenyl]-4'-carboxylate**

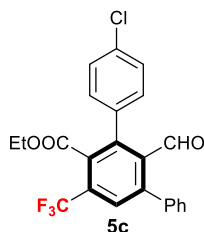

Prepared according to the general procedure using ethyl ethyl (*E*)-5-oxo-5-phenyl-3-(trifluoromethyl)pent-3-enoate (57.3 mg, 0.2 mmol) and 4-chlorocinnamaldehyde (50.0 mg, 0.3 mmol). Purification of the crude product *via* column chromatography delivered **5c** as a white solid with 79% yield (68.6 mg). m.p. 96-98 °C.

*NMR and HRMS data for the product 5c:*

**<sup>1</sup>H NMR (400 MHz, CDCl<sub>3</sub>):** δ = 9.81 (s, 1H), 7.78 (s, 1H), 7.48-7.47 (m, 3H), 7.40-7.38 (m, 2H), 7.36-7.34 (m, 2H), 7.24-7.22 (s, 2H), 4.04 (q, *J* = 7.2 Hz, 2H), 1.05 (t, *J* = 7.2 Hz, 3H) ppm.

**<sup>13</sup>C NMR (100 MHz, CDCl<sub>3</sub>):** δ = 191.7, 165.7, 145.2, 140.4, 136.9, 136.7, 134.8, 133.8, 133.1 (d, *J* = 2.0 Hz), 131.1, 129.6 (d, *J* = 32.0 Hz), 129.5, 129.0, 128.8, 128.3, 128.2 (q, *J* = 5.0 Hz), 122.8 (q, *J* = 273.0 Hz), 62.2, 13.6 ppm.

**HRMS (ESI):** *m/z* calculated for C<sub>23</sub>H<sub>16</sub>ClF<sub>3</sub>O<sub>3</sub>+Na 455.0638, found 455.0635.

**ethyl 2''-bromo-2'-formyl-5'-(trifluoromethyl)-[1,1':3',1''-terphenyl]-4'-carboxylate**

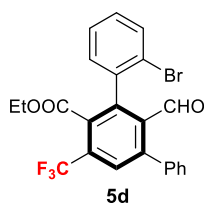

Prepared according to the general procedure using ethyl ethyl (*E*)-5-oxo-5-phenyl-3-(trifluoromethyl)pent-3-enoate (57.3 mg, 0.2 mmol) and 2-bromocinnamaldehyde (63.3 mg, 0.3 mmol). Purification of the crude product *via* column chromatography delivered **5d** as a white solid with 70% yield (67.1 mg). m.p. 86-88 °C.



*NMR and HRMS data for the product 5d:*

**<sup>1</sup>H NMR (400 MHz, CDCl<sub>3</sub>):** δ = 9.83 (s, 1H), 7.83 (s, 1H), 7.55 (dd, *J* = 8.0, 0.8 Hz, 1H), 7.53-7.49 (m, 3H), 7.40-7.36 (m, 3H), 7.34- 7.28 (m, 2H), 4.00 (q, *J* = 7.2 Hz, 2H), 1.01 (t, *J* = 7.2 Hz, 3H) ppm.

**<sup>13</sup>C NMR (100 MHz, CDCl<sub>3</sub>):** δ = 190.8, 165.4, 145.4, 140.1, 136.8, 136.7, 136.2, 132.7 (d, *J* = 2.0 Hz), 132.3, 131.2, 130.1 (d, *J* = 32.0 Hz), 130.0, 129.7, 129.1, 128.9, 128.6 (q, *J* = 4.0 Hz), 127.0, 123.6, 122.8 (d, *J* = 273.0 Hz), 62.0, 13.5 ppm.

**HRMS (ESI):** *m/z* calculated for C<sub>23</sub>H<sub>16</sub>BrF<sub>3</sub>O<sub>3</sub>+Na 499.0133, found 499.0116.

**ethyl 3''-bromo-2'-formyl-5'-(trifluoromethyl)-[1,1':3',1''-terphenyl]-4'-carboxylate**

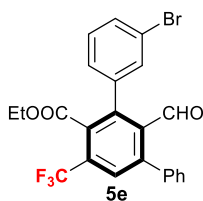

Prepared according to the general procedure using ethyl ethyl (*E*)-5-oxo-5-phenyl-3-(trifluoromethyl)pent-3-enoate (57.3 mg, 0.2 mmol) and 3-bromocinnamaldehyde (63.3 mg, 0.3 mmol). Purification of the crude product *via* column chromatography delivered **5e** as a white solid with 75% yield (71.3 mg). m.p. 134-136 °C.

*NMR and HRMS data for the product 5e:*

**<sup>1</sup>H NMR (400 MHz, CDCl<sub>3</sub>):** δ = 9.82 (s, 1H), 7.79 (s, 1H), 7.55 (ddd, *J* = 8.0, 2.0, 1.2 Hz, 1H), 7.50-7.46 (m, 4H), 7.36-7.34 (m, 2H), 7.28 (t, *J* = 7.6 Hz, 1H), 7.22 (d, *J* = 7.6, 1.2 Hz, 1H), 4.06 (q, *J* = 7.2 Hz, 2H), 1.07 (t, *J* = 7.2 Hz, 3H) ppm.

**<sup>13</sup>C NMR (100 MHz, CDCl<sub>3</sub>):** δ = 191.5, 165.6, 145.3, 140.0, 137.3, 136.9, 136.4, 133.1 (d, *J* = 2.0 Hz), 132.5, 131.6, 129.7 (d, *J* = 32.0 Hz), 129.6, 129.5, 129.0, 128.8, 128.5, 128.4 (q, *J* = 4.0 Hz), 122.8 (d, *J* = 273.0 Hz), 122.1, 62.2, 13.6 ppm.

**HRMS (ESI):** *m/z* calculated for C<sub>23</sub>H<sub>16</sub>BrF<sub>3</sub>O<sub>3</sub>+Na 499.0133, found 499.0140.

**ethyl 4''-bromo-2'-formyl-5'-(trifluoromethyl)-[1,1':3',1''-terphenyl]-4'-carboxylate**

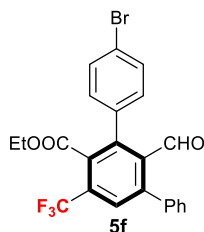

Prepared according to the general procedure using ethyl ethyl (*E*)-5-oxo-5-phenyl-3-(trifluoromethyl)pent-3-enoate (57.3 mg, 0.2 mmol) and 4-bromocinnamaldehyde (63.3 mg, 0.3 mmol). Purification of the crude product *via* column chromatography delivered **5f** as a white solid with 80% yield (76.2 mg). m.p. 102-104 °C.

*NMR and HRMS data for the product 5f:*

**<sup>1</sup>H NMR (400 MHz, CDCl<sub>3</sub>):** δ = 9.81 (s, 1H), 7.78 (s, 1H), 7.54 (d, *J* = 8.4 Hz, 2H), 7.50-7.47 (m, 3H), 7.36-7.34 (m, 2H), 7.16 (d, *J* = 8.4 Hz, 2H), 4.04 (q, *J* = 7.2 Hz, 2H), 1.05 (t, *J* = 7.2 Hz, 3H) ppm.

**<sup>13</sup>C NMR (100 MHz, CDCl<sub>3</sub>):** δ = 191.7, 165.7, 145.3, 140.4, 136.9, 136.6, 134.3, 133.0 (d, *J* = 1.0 Hz), 131.3, 131.2, 129.6 (q, *J* = 33.0 Hz), 129.6, 129.0, 128.8, 128.3 (q, *J* = 4.0 Hz), 123.0, 122.8 (q, *J* = 273.0 Hz), 62.2, 13.6 ppm.

**HRMS (ESI):** m/z calculated for C<sub>23</sub>H<sub>16</sub>BrF<sub>3</sub>O<sub>3</sub>+Na 499.0133, found 499.0130.

**ethyl 2''-fluoro-2'-formyl-5'-(trifluoromethyl)-[1,1':3',1''-terphenyl]-4'-carboxylate**

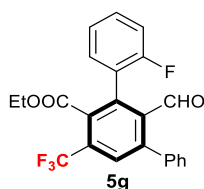

Prepared according to the general procedure using ethyl ethyl (*E*)-5-oxo-5-phenyl-3-(trifluoromethyl)pent-3-enoate (57.3 mg, 0.2 mmol) and 2-fluorocinnamaldehyde (45.1 mg, 0.3 mmol). Purification of the crude product *via* column chromatography delivered **5g** as a white solid with 71% yield (58.9 mg). m.p. 100-102 °C.

*NMR and HRMS data for the product 5g:*

**<sup>1</sup>H NMR (400 MHz, CDCl<sub>3</sub>):** δ = 9.84 (s, 1H), 7.83 (s, 1H), 7.52-7.48 (m, 3H), 7.42-7.37 (m, 3H), 7.27 (td, *J* = 7.6, 2.0 Hz, 1H), 7.19 (td, *J* = 7.6, 1.2 Hz, 1H), 7.14-7.09 (m, 1H), 4.06-3.98 (m, 2H), 1.01 (t, *J* = 7.2 Hz, 3H) ppm.

**<sup>13</sup>C NMR (100 MHz, CDCl<sub>3</sub>):** δ = 191.2, 165.6, 159.6 (d, *J* = 246.0 Hz), 145.6, 136.6, 136.5, 134.9, 133.6 (d, *J* = 2.0 Hz), 131.1 (d, *J* = 3.0 Hz), 130.7 (d, *J* = 8.0 Hz), 130.1 (d, *J* = 32.0 Hz), 129.8, 129.1, 128.6 (q, *J* = 5.0 Hz), 123.8 (d, *J* = 4.0 Hz), 123.6 (d, *J* = 17.0 Hz), 122.8 (q, *J* = 273.0 Hz), 115.2 (d, *J* = 21.0 Hz), 62.1, 13.5 ppm.

**HRMS (ESI):** *m/z* calculated for C<sub>23</sub>H<sub>16</sub>F<sub>4</sub>O<sub>3</sub>+Na 439.0933, found 439.0930.

**ethyl 3''-fluoro-2'-formyl-5'-(trifluoromethyl)-[1,1':3',1''-terphenyl]-4'-carboxylate**

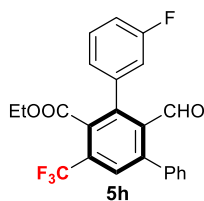

Prepared according to the general procedure using ethyl ethyl (*E*)-5-oxo-5-phenyl-3-(trifluoromethyl)pent-3-enoate (57.3 mg, 0.2 mmol) and 3-fluorocinnamaldehyde (45.1 mg, 0.3 mmol). Purification of the crude product *via* column chromatography delivered **5h** as a white solid with 76% yield (63.4 mg). m.p. 102-104 °C.

*NMR and HRMS data for the product 5h:*

**<sup>1</sup>H NMR (400 MHz, CDCl<sub>3</sub>):** δ = 9.82 (s, 1H), 7.79 (s, 1H), 7.51-7.46 (m, 3H), 7.40-7.34 (m, 3H), 7.14-7.02 (m, 3H), 4.05 (q, *J* = 7.2 Hz, 2H), 1.05 (t, *J* = 7.2 Hz, 3H) ppm.

**<sup>13</sup>C NMR (100 MHz, CDCl<sub>3</sub>):** δ = 191.6, 165.6, 162.2 (d, *J* = 246.0 Hz), 145.2, 140.3, 137.4 (d, *J* = 8.0 Hz), 137.0, 136.6, 133.0 (d, *J* = 1.0 Hz), 129.7 (d, *J* = 8.0 Hz), 129.6, 128.9, 128.8, 128.4 (q, *J* = 5.0 Hz), 125.7 (d, *J* = 3.0 Hz), 122.8 (q, *J* = 273.0 Hz), 117.1 (d, *J* = 22.0 Hz), 115.6 (d, *J* = 21.0 Hz), 62.1, 13.6 ppm.

**HRMS (ESI):** *m/z* calculated for C<sub>23</sub>H<sub>16</sub>F<sub>4</sub>O<sub>3</sub>+Na 439.0933, found 439.0932.

**ethyl 4''-fluoro-2'-formyl-5'-(trifluoromethyl)-[1,1':3',1''-terphenyl]-4'-carboxylate**

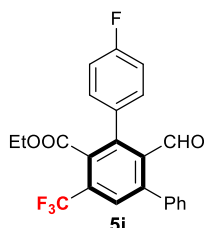

Prepared according to the general procedure using ethyl ethyl (*E*)-5-oxo-5-phenyl-3-(trifluoromethyl)pent-3-enoate (57.3 mg, 0.2 mmol) and 4-fluorocinnamaldehyde (45.1 mg, 0.3 mmol). Purification of the crude product *via* column chromatography delivered **5i** as a white solid with 82% yield (68.5 mg). m.p. 98-100 °C.

*NMR and HRMS data for the product 5i:*

**<sup>1</sup>H NMR (400 MHz, CDCl<sub>3</sub>):** δ = 9.81 (s, 1H), 7.78 (s, 1H), 7.49-7.47 (m, 3H), 7.36-7.34 (m, 2H), 7.29-7.25 (m, 2H), 7.13-7.07 (m, 2H), 4.04 (q, *J* = 7.2 Hz, 2H), 1.05 (t, *J* = 7.2 Hz, 3H) ppm.

**<sup>13</sup>C NMR (100 MHz, CDCl<sub>3</sub>):** δ = 191.9, 165.8, 162.8 (d, *J* = 247.0 Hz), 145.1, 140.7, 137.1, 136.9, 133.3, 131.6 (d, *J* = 9.0 Hz), 131.1 (d, *J* = 4.0 Hz), 129.6, 129.5 (d, *J* = 32.0 Hz), 128.9, 128.8, 128.2 (q, *J* = 5.0 Hz), 122.8 (q, *J* = 273.0 Hz), 115.1 (d, *J* = 21.0 Hz), 62.1, 13.6 ppm.

**HRMS (ESI):** *m/z* calculated for C<sub>23</sub>H<sub>16</sub>F<sub>4</sub>O<sub>3</sub>+Na 439.0933, found 439.0934.

**ethyl 2'-formyl-2''-nitro-5'-(trifluoromethyl)-[1,1':3',1''-terphenyl]-4'-carboxylate**

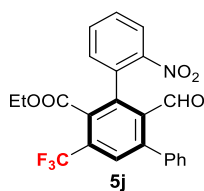

Prepared according to the general procedure using ethyl ethyl (*E*)-5-oxo-5-phenyl-3-(trifluoromethyl)pent-3-enoate (57.3 mg, 0.2 mmol) and 2-nitrocinnamaldehyde (53.2

mg, 0.3 mmol). Purification of the crude product *via* column chromatography delivered **5j** as a white solid with 72% yield (63.7 mg). m.p. 80-81 °C.

*NMR and HRMS data for the product 5j:*

**<sup>1</sup>H NMR (400 MHz, CDCl<sub>3</sub>):** δ = 9.80 (s, 1H), 8.24 (dd, *J* = 8.0, 1.2 Hz, 1H), 7.87 (s, 1H), 7.66 (dd, *J* = 7.6, 1.6 Hz, 1H), 7.60 (dd, *J* = 8.0, 1.6 Hz, 1H), 7.54-7.50 (m, 3H), 7.45-7.42 (m, 2H), 7.32 (dd, *J* = 7.6, 1.6 Hz, 1H), 4.01-3.85 (m, 2H), 0.99 (t, *J* = 7.2 Hz, 3H) ppm.

**<sup>13</sup>C NMR (100 MHz, CDCl<sub>3</sub>):** δ = 190.9, 165.4, 148.0, 146.8, 137.9, 136.1, 134.9 (d, *J* = 1.0 Hz), 133.0, 132.2, 131.8, 133.4 (d, *J* = 2.0 Hz), 130.4 (d, *J* = 33.0 Hz), 130.0, 129.5, 129.4, 129.0, 128.5 (q, *J* = 5.0 Hz), 124.5, 122.7 (q, *J* = 273.0 Hz), 62.2, 13.5 ppm.

**HRMS (ESI):** *m/z* calculated for C<sub>23</sub>H<sub>16</sub>F<sub>3</sub>NO<sub>5</sub>+Na 466.0878, found 466.0879.

**ethyl 2'-formyl-4''-nitro-5'-(trifluoromethyl)-[1,1':3',1''-terphenyl]-4'-carboxylate**

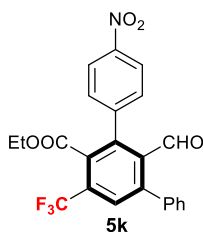

Prepared according to the general procedure using ethyl ethyl (*E*)-5-oxo-5-phenyl-3-(trifluoromethyl)pent-3-enoate (57.3 mg, 0.2 mmol) and 4-nitrocinnamaldehyde (53.2 mg, 0.3 mmol). Purification of the crude product *via* column chromatography delivered **5k** as a white solid with 75% yield (66.2 mg). m.p. 150-152 °C.

*NMR and HRMS data for the product 5k:*

**<sup>1</sup>H NMR (400 MHz, CDCl<sub>3</sub>):** δ = 9.82 (s, 1H), 8.28-8.26 (m, 2H), 7.88 (s, 1H), 7.53-7.51 (m, 3H), 7.47-7.44 (m, 2H), 7.40-7.38 (m, 2H), 4.02 (q, *J* = 7.2 Hz, 2H), 1.05 (t, *J* = 7.2 Hz, 3H) ppm.

**<sup>13</sup>C NMR (100 MHz, CDCl<sub>3</sub>):** δ = 190.9, 165.4, 148.0, 146.8, 137.9, 136.1, 134.9 (d,

$J = 1.0$  Hz), 133.0, 132.2, 131.8, 133.4 (d,  $J = 2.0$  Hz), 130.4 (d,  $J = 33.0$  Hz), 130.0, 129.5, 129.4, 129.0, 128.5 (q,  $J = 5.0$  Hz), 124.5, 122.7 (q,  $J = 273.0$  Hz), 62.2, 13.5 ppm.

**HRMS (ESI):**  $m/z$  calculated for  $C_{23}H_{16}F_3NO_5+Na$  466.0878, found 466.0881.

**ethyl 2'-formyl-3'',5'-bis(trifluoromethyl)-[1,1':3',1''-terphenyl]-4'-carboxylate**

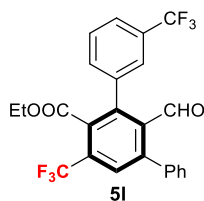

Prepared according to the general procedure using ethyl ethyl (*E*)-5-oxo-5-phenyl-3-(trifluoromethyl)pent-3-enoate (57.3 mg, 0.2 mmol) and 3-trifluoromethylcinnamaldehyde (60.1 mg, 0.3 mmol). Purification of the crude product *via* column chromatography delivered **5I** as a white solid with 69% yield (64.8 mg). m.p. 142-144 °C.

*NMR and HRMS data for the product 5I:*

**$^1H$  NMR (400 MHz,  $CDCl_3$ ):**  $\delta$  = 9.82 (s, 1H), 7.83 (s, 1H), 7.83 (d,  $J = 7.6$  Hz, 1H), 7.58-7.47 (m, 6H), 7.39-7.36 (m, 2H), 4.05-3.95 (m, 2H), 1.01 (t,  $J = 7.2$  Hz, 3H) ppm.

**$^{13}C$  NMR (100 MHz,  $CDCl_3$ ):**  $\delta$  = 191.4, 165.5, 145.8, 139.9, 136.6, 136.4, 136.3 (d,  $J = 1.0$  Hz), 133.3 (d,  $J = 2.0$  Hz), 133.2 (d,  $J = 1.0$  Hz), 130.4 (d,  $J = 33.0$  Hz), 130.0, 129.7, 129.2, 128.9, 128.5 (d,  $J = 4.0$  Hz), 128.4, 126.4 (q,  $J = 3.0$  Hz), 125.2 (q,  $J = 4.0$  Hz), 122.7 (d,  $J = 273.0$  Hz), 122.5, 62.2, 13.4 ppm.

**HRMS (ESI):**  $m/z$  calculated for  $C_{24}H_{16}F_6O_3+Na$  489.0901, found 489.0906.

**ethyl 2'-formyl-4''-methyl-5'-(trifluoromethyl)-[1,1':3',1''-terphenyl]-4'-carboxylate**

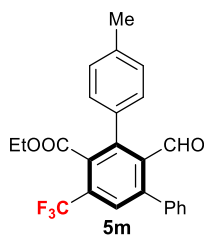

Prepared according to the general procedure using ethyl ethyl (*E*)-5-oxo-5-phenyl-3-(trifluoromethyl)pent-3-enoate (57.3 mg, 0.2 mmol) and 4-methylcinnamaldehyde (43.9 mg, 0.3 mmol). Purification of the crude product *via* column chromatography delivered **5m** as a white solid with 83% yield (68.6 mg). m.p. 101-103 °C.

*NMR and HRMS data for the product 5m:*

**<sup>1</sup>H NMR (400 MHz, CDCl<sub>3</sub>):** δ = 9.81 (s, 1H), 7.73 (s, 1H), 7.46-7.42 (m, 3H), 7.34-7.32 (m, 2H), 7.23-7.17 (m, 4H), 4.03 (q, *J* = 7.2 Hz, 2H), 2.39 (s, 3H), 1.02 (t, *J* = 7.2 Hz, 3H) ppm.

**<sup>13</sup>C NMR (100 MHz, CDCl<sub>3</sub>):** δ = 192.2, 166.0, 144.5, 142.3, 138.6, 137.7, 137.1, 133.1 (d, *J* = 2.0 Hz), 132.0, 129.7, 129.4, 129.3 (d, *J* = 32.0 Hz), 128.8, 128.6, 127.9 (q, *J* = 5.0 Hz), 122.7 (q, *J* = 273.0 Hz), 62.0, 21.3, 13.6 ppm.

**HRMS (ESI):** m/z calculated for C<sub>24</sub>H<sub>19</sub>F<sub>3</sub>O<sub>3</sub>+Na 435.1184, found 435.1188.

**ethyl 2'-formyl-2''-methoxy-5'-(trifluoromethyl)-[1,1':3',1''-terphenyl]-4'-carboxylate**

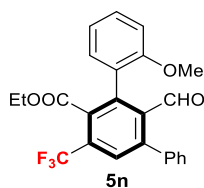

Prepared according to the general procedure using ethyl ethyl (*E*)-5-oxo-5-phenyl-3-(trifluoromethyl)pent-3-enoate (57.3 mg, 0.2 mmol) and 2-methoxycinnamaldehyde (48.7 mg, 0.3 mmol). Purification of the crude product *via* column chromatography delivered **5n** as a white solid with 80% yield (68.2 mg). m.p. 108-110 °C.

*NMR and HRMS data for the product 5n:*

**<sup>1</sup>H NMR (400 MHz, CDCl<sub>3</sub>):** δ = 9.78 (s, 1H), 7.74 (s, 1H), 7.48-7.44 (m, 3H), 7.41-7.7.35 (m, 3H), 7.23 (dd, *J* = 7.6, 1.6 Hz, 1H), 7.02 (td, *J* = 7.6, 0.8 Hz, 1H), 6.92 (d, *J* = 8.0 Hz, 1H), 4.00 (q, *J* = 7.2 Hz, 2H), 3.72 (s, 3H), 0.99 (t, *J* = 7.2 Hz, 3H) ppm.

**<sup>13</sup>C NMR (100 MHz, CDCl<sub>3</sub>):** δ = 191.6, 166.0, 156.2, 144.2, 138.4, 137.5, 137.2, 133.0 (d, *J* = 2.0 Hz), 130.7, 130.4, 129.9 (d, *J* = 33.0 Hz), 129.6, 128.7, 127.9 (q, *J* = 5.0 Hz), 124.5, 123.0 (d, *J* = 273.0 Hz), 120.5, 110.7, 61.8, 55.6, 13.6 ppm.

**HRMS (ESI):** *m/z* calculated for C<sub>24</sub>H<sub>19</sub>F<sub>3</sub>O<sub>4</sub>+Na 451.1133, found 451.1135.

**ethyl 2'-formyl-4''-methoxy-5'-(trifluoromethyl)-[1,1':3',1''-terphenyl]-4'-carboxylate**

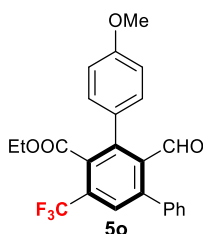

Prepared according to the general procedure using ethyl ethyl (*E*)-5-oxo-5-phenyl-3-(trifluoromethyl)pent-3-enoate (57.3 mg, 0.2 mmol) and 4-methoxycinnamaldehyde (48.7 mg, 0.3 mmol). Purification of the crude product *via* column chromatography delivered **5o** as a white solid with 84% yield (72.3 mg). m.p. 88-90 °C.

*NMR and HRMS data for the product 5o:*

**<sup>1</sup>H NMR (400 MHz, CDCl<sub>3</sub>):** δ = 9.81 (s, 1H), 7.72 (s, 1H), 7.48-7.44 (m, 3H), 7.34-7.32 (m, 2H), 7.24-7.20 (m, 2H), 6.95-6.93 (m, 2H), 4.05 (q, *J* = 7.2 Hz, 2H), 3.84 (s, 3H), 1.05 (t, *J* = 7.2 Hz, 3H) ppm.

**<sup>13</sup>C NMR (100 MHz, CDCl<sub>3</sub>):** δ = 192.3, 166.0, 159.9, 144.5, 142.0, 137.7, 137.3, 133.2 (d, *J* = 2.0 Hz), 131.1, 129.4, 129.3 (d, *J* = 32.0 Hz), 128.6, 127.8 (d, *J* = 4.0 Hz), 127.0, 122.9 (q, *J* = 273.0 Hz), 113.6, 62.0, 55.3, 13.7 ppm.

**HRMS (ESI):** *m/z* calculated for C<sub>24</sub>H<sub>19</sub>F<sub>3</sub>O<sub>4</sub>+Na 451.1133, found 451.1131.

**ethyl 2'',4''-dichloro-2'-formyl-5'-(trifluoromethyl)-[1,1':3',1''-terphenyl]-4'-carboxylate**



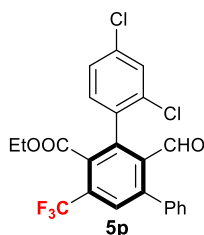

Prepared according to the general procedure using ethyl ethyl (*E*)-5-oxo-5-phenyl-3-(trifluoromethyl)pent-3-enoate (57.3 mg, 0.2 mmol) and 3-(2,4-dichlorophenyl)acrylaldehyde (60.3 mg, 0.3 mmol). Purification of the crude product *via* column chromatography delivered **5p** as a white solid with 75% yield (69.7 mg). m.p. 90-92 °C.

*NMR and HRMS data for the product 5p:*

**<sup>1</sup>H NMR (400 MHz, CDCl<sub>3</sub>):** δ = 9.81 (s, 1H), 7.86 (s, 1H), 7.52-7.49 (m, 3H), 7.46 (d, *J* = 2.0 Hz, 1H), 7.39 (dd, *J* = 7.6, 4.0 Hz, 2H), 7.32 (dd, *J* = 8.0, 2.0 Hz, 1H), 7.23 (d, *J* = 8.4 Hz, 2H), 4.05 (q, *J* = 7.2 Hz, 2H), 1.07 (t, *J* = 7.2 Hz, 3H) ppm.

**<sup>13</sup>C NMR (100 MHz, CDCl<sub>3</sub>):** δ = 190.6, 165.3, 146.0, 137.1, 136.3, 136.1, 135.2, 134.2, 133.6, 131.7, 130.3 (d, *J* = 33.0 Hz), 129.8, 129.3, 129.1, 129.0, 128.9, 128.8 (d, *J* = 4.0 Hz), 126.8, 122.7 (d, *J* = 273.0 Hz), 62.2, 13.6 ppm.

**HRMS (ESI):** m/z calculated for C<sub>23</sub>H<sub>15</sub>Cl<sub>2</sub>F<sub>3</sub>O<sub>3</sub>+Na 489.0248, found 489.0246.

**ethyl 2'',5''-dichloro-2'-formyl-5'-(trifluoromethyl)-[1,1':3',1''-terphenyl]-4'-carboxylate**

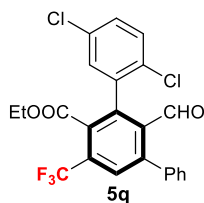

Prepared according to the general procedure using ethyl ethyl (*E*)-5-oxo-5-phenyl-3-(trifluoromethyl)pent-3-enoate (57.3 mg, 0.2 mmol) and 3-(2,5-dichlorophenyl)acrylaldehyde (60.3 mg, 0.3 mmol). Purification of the crude product *via* column chromatography delivered **5q** as a white solid with 71% yield (66.4 mg). m.p. 172-174 °C.

*NMR and HRMS data for the product 5q:*

**<sup>1</sup>H NMR (400 MHz, CDCl<sub>3</sub>):** δ = 9.82 (s, 1H), 7.86 (s, 1H), 7.53-7.50 (m, 3H), 7.41-7.37 (m, 2H), 7.36-7.34 (m, 2H), 7.32-7.31 (m, 1H), 4.08 (qd, *J* = 7.2, 2.8 Hz, 2H), 1.08 (t, *J* = 7.2 Hz, 3H) ppm.

**<sup>13</sup>C NMR (100 MHz, CDCl<sub>3</sub>):** δ = 190.5, 165.2, 146.0, 136.9, 136.6, 136.2, 135.9, 132.8 (d, *J* = 2.0 Hz), 132.4, 131.8, 130.8, 130.5, 130.2, 129.9, 129.8, 129.3, 129.0, 128.9 (d, *J* = 5.0 Hz), 122.7 (d, *J* = 273.0 Hz), 62.2, 13.6 ppm.

**HRMS (ESI):** *m/z* calculated for C<sub>23</sub>H<sub>15</sub>Cl<sub>2</sub>F<sub>3</sub>O<sub>3</sub>+Na 489.0248, found 489.0247.

**ethyl 3'',4''-dichloro-2'-formyl-5'-(trifluoromethyl)-[1,1':3',1''-terphenyl]-4'-carboxylate**

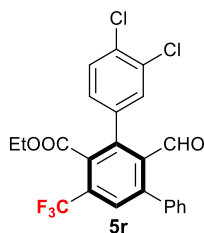

Prepared according to the general procedure using ethyl ethyl (*E*)-5-oxo-5-phenyl-3-(trifluoromethyl)pent-3-enoate (57.3 mg, 0.2 mmol) and 3-(3,4-dichlorophenyl)acrylaldehyde (60.3 mg, 0.3 mmol). Purification of the crude product *via* column chromatography delivered **5r** as a white solid with 74% yield (69.1 mg). m.p. 146-148 °C.

*NMR and HRMS data for the product 5r:*

**<sup>1</sup>H NMR (400 MHz, CDCl<sub>3</sub>):** δ = 9.82 (s, 1H), 7.82 (s, 1H), 7.51-7.47 (m, 4H), 7.40 (d, *J* = 2.0 Hz, 1H), 7.37-7.35 (m, 2H), 7.13 (dd, *J* = 8.0, 2.0 Hz, 1H), 4.08 (qd, *J* = 7.2, 2.4 Hz, 2H), 1.10 (t, *J* = 7.2 Hz, 3H) ppm.

**<sup>13</sup>C NMR (100 MHz, CDCl<sub>3</sub>):** δ = 191.4, 165.5, 145.8, 138.8, 136.5, 136.3, 135.4, 133.1 (d, *J* = 2.0 Hz), 132.9, 132.3, 131.4, 129.9, 129.7, 129.2, 128.9, 128.6 (q, *J* = 5.0 Hz), 122.7 (d, *J* = 273.0 Hz), 62.3, 13.6 ppm.

**HRMS (ESI):** *m/z* calculated for C<sub>23</sub>H<sub>15</sub>Cl<sub>2</sub>F<sub>3</sub>O<sub>3</sub>+Na 489.0248, found 489.0250.

**ethyl 4''-bromo-2''-fluoro-2'-formyl-5'-(trifluoromethyl)-[1,1':3',1''-terphenyl]-4'-carboxylate**

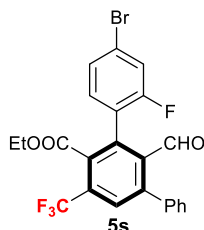

Prepared according to the general procedure using ethyl ethyl (*E*)-5-oxo-5-phenyl-3-(trifluoromethyl)pent-3-enoate (57.3 mg, 0.2 mmol) and 3-(4-bromo-2-fluorophenyl)acrylaldehyde (68.7 mg, 0.3 mmol). Purification of the crude product *via* column chromatography delivered **5s** as a white solid with 76% yield (75.2 mg). m.p. 136-137 °C.

*NMR and HRMS data for the product 5s:*

**<sup>1</sup>H NMR (400 MHz, CDCl<sub>3</sub>):** δ = 9.82 (s, 1H), 7.86 (s, 1H), 7.53-7.49 (m, 3H), 7.40-7.33 (m, 3H), 7.13 (dd, *J* = 8.8, 1.6 Hz, 1H), 7.13 (t, *J* = 7.6 Hz, 3H), 4.07 (q, *J* = 7.2 Hz, 2H), 1.08 (t, *J* = 7.2 Hz, 3H) ppm.

**<sup>13</sup>C NMR (100 MHz, CDCl<sub>3</sub>):** δ = 190.9, 165.4, 159.5 (d, *J* = 249.0 Hz), 146.1, 136.2, 133.7, 133.5 (d, *J* = 1.0 Hz), 131.9 (d, *J* = 4.0 Hz), 130.3 (d, *J* = 32.0 Hz), 129.8, 129.3, 129.0, 128.9 (d, *J* = 5.0 Hz), 127.2 (d, *J* = 3.0 Hz), 126.0, 123.3 (d, *J* = 9.0 Hz), 123.0 (d, *J* = 17.0 Hz), 122.7 (d, *J* = 273.0 Hz), 118.9 (d, *J* = 25.0 Hz), 62.3, 13.6 ppm.

**HRMS (ESI):** *m/z* calculated for C<sub>23</sub>H<sub>15</sub>BrF<sub>4</sub>O<sub>3</sub>+Na 517.0038, found 517.0041.

**ethyl 5''-bromo-2''-fluoro-2'-formyl-5'-(trifluoromethyl)-[1,1':3',1''-terphenyl]-4'-carboxylate**

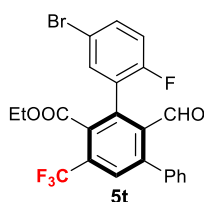

Prepared according to the general procedure using ethyl ethyl (*E*)-5-oxo-5-phenyl-3-

(trifluoromethyl)pent-3-enoate (57.3 mg, 0.2 mmol) and 3-(5-bromo-2-fluorophenyl)acrylaldehyde (68.7 mg, 0.3 mmol). Purification of the crude product *via* column chromatography delivered **5t** as a white solid with 73% yield (71.9 mg). m.p. 140-142 °C.

*NMR and HRMS data for the product 5t:*

**<sup>1</sup>H NMR (400 MHz, CDCl<sub>3</sub>):** δ = 9.83 (s, 1H), 7.86 (s, 1H), 7.53-7.49 (m, 4H), 7.41-7.38 (m, 3H), 7.01 (t, *J* = 8.8 Hz, 1H), 4.15-4.07 (m, 2H), 1.11 (t, *J* = 7.2 Hz, 3H) ppm.

**<sup>13</sup>C NMR (100 MHz, CDCl<sub>3</sub>):** δ = 190.8, 165.3, 158.8 (d, *J* = 246.0 Hz), 146.2, 136.12, 136.09, 133.54 (d, *J* = 2.0 Hz), 133.47, 133.41 (d, *J* = 6.0 Hz), 133.2, 130.4 (d, *J* = 33.0 Hz), 129.8, 129.3, 129.1 (d, *J* = 4.0 Hz), 129.0, 125.9 (d, *J* = 18.0 Hz), 122.7 (d, *J* = 273.0 Hz), 116.9 (d, *J* = 24.0 Hz), 116.2 (d, *J* = 4.0 Hz), 62.3, 13.6 ppm.

**HRMS (ESI):** m/z calculated for C<sub>23</sub>H<sub>15</sub>BrF<sub>4</sub>O<sub>3</sub>+Na 517.0038, found 517.0043.

**ethyl 2'-formyl-3'',4''-dimethoxy-5'-(trifluoromethyl)-[1,1':3',1''-terphenyl]-4'-carboxylate**

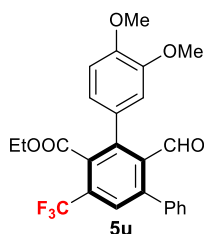

Prepared according to the general procedure using ethyl ethyl (*E*)-5-oxo-5-phenyl-3-(trifluoromethyl)pent-3-enoate (57.3 mg, 0.2 mmol) and 3-(3,4-dimethoxyphenyl)acrylaldehyde (57.7 mg, 0.3 mmol). Purification of the crude product *via* column chromatography delivered **5u** as a white solid with 78% yield (71.3 mg). m.p. 110-111 °C.

*NMR and HRMS data for the product 5u:*

**<sup>1</sup>H NMR (400 MHz, CDCl<sub>3</sub>):** δ = 9.82 (s, 1H), 7.72 (s, 1H), 7.47-7.44 (m, 3H), 7.34-7.32 (m, 2H), 6.92-6.90 (m, 1H), 6.86-6.84 (m, 2H), 4.10-4.04 (m, 2H), 3.92 (s, 3H), 3.86 (s, 3H), 1.07 (t, *J* = 7.2 Hz, 3H) ppm.

**<sup>13</sup>C NMR (100 MHz, CDCl<sub>3</sub>):** δ = 192.3, 166.1, 149.4, 148.6, 144.3, 142.0, 137.7, 137.4, 133.0 (d, *J* = 2.0 Hz), 129.4, 129.3 (d, *J* = 33.0 Hz), 128.6, 127.9 (q, *J* = 4.0 Hz), 127.1, 122.9 (d, *J* = 273.0 Hz), 122.8, 113.2, 110.7, 62.1, 56.0, 55.9, 13.7 ppm.

**HRMS (ESI):** *m/z* calculated for C<sub>25</sub>H<sub>21</sub>F<sub>3</sub>O<sub>5</sub>+Na: 481.1239, found 481.1236

**ethyl 2-formyl-3-(furan-2-yl)-5-(trifluoromethyl)-[1,1'-biphenyl]-4-carboxylate**

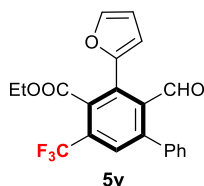

Prepared according to the general procedure using ethyl ethyl (*E*)-5-oxo-5-phenyl-3-(trifluoromethyl)pent-3-enoate (57.3 mg, 0.2 mmol) and 3-(furan-2-yl)acrylaldehyde (36.6 mg, 0.3 mmol). Purification of the crude product *via* column chromatography delivered **5v** as a white solid with 64% yield (49.8 mg). m.p. 76-77 °C.

*NMR and HRMS data for the product 5v:*

**<sup>1</sup>H NMR (400 MHz, CDCl<sub>3</sub>):** δ = 9.91 (s, 1H), 7.76 (s, 1H), 7.55 (dd, *J* = 2.0, 0.8 Hz, 1H), 7.49-7.45 (m, 3H), 7.35-7.32 (m, 2H), 6.58 (dd, *J* = 3.2, 0.8 Hz, 1H), 6.53 (dd, *J* = 3.2, 1.6 Hz, 1H), 4.26 (q, *J* = 7.2, 2.4 Hz, 2H), 1.23 (t, *J* = 7.2 Hz, 3H) ppm.

**<sup>13</sup>C NMR (100 MHz, CDCl<sub>3</sub>):** δ = 191.5, 165.9, 146.9, 144.8, 144.0, 137.5, 137.0, 132.8 (d, *J* = 2.0 Hz), 130.5, 129.8 (d, *J* = 32.0 Hz), 129.5, 128.9 (d, *J* = 4.0 Hz), 128.8, 128.7, 122.7 (d, *J* = 273.0 Hz), 113.0, 111.6, 62.4, 13.8 ppm.

**HRMS (ESI):** *m/z* calculated for C<sub>21</sub>H<sub>15</sub>F<sub>3</sub>O<sub>4</sub>+Na 411.0820, found 411.0822.

**ethyl 2-formyl-3-(naphthalen-1-yl)-5-(trifluoromethyl)-[1,1'-biphenyl]-4-carboxylate**

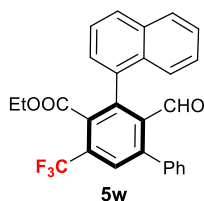

Prepared according to the general procedure using ethyl ethyl (*E*)-5-oxo-5-phenyl-3-(trifluoromethyl)pent-3-enoate (57.3 mg, 0.2 mmol) and 3-(naphthalen-1-yl)acrylaldehyde (54.7 mg, 0.3 mmol). Purification of the crude product *via* column chromatography delivered **5w** as a white solid with 69% yield (61.7 mg). m.p. 110-112 °C.

*NMR and HRMS data for the product 5w:*

**<sup>1</sup>H NMR (400 MHz, CDCl<sub>3</sub>):** δ = 9.67 (s, 1H), 7.90 (dd, *J* = 12.8, 8.4 Hz, 1H), 7.85 (s, 1H), 7.53-7.45 (m, 5H), 7.43-7.38 (m, 5H), 3.77-3.68 (m, 2H), 0.55 (t, *J* = 7.2 Hz, 3H) ppm.

**<sup>13</sup>C NMR (100 MHz, CDCl<sub>3</sub>):** δ = 191.4, 165.6, 144.8, 140.8, 137.5, 137.3, 133.7 (d, *J* = 2.0 Hz), 133.1, 132.5, 132.4, 129.9 (d, *J* = 33.0 Hz), 129.5, 129.2, 128.7, 128.6, 128.5 (d, *J* = 5.0 Hz), 128.3, 128.2, 126.8, 126.2, 125.7, 124.8, 122.9 (d, *J* = 273.0 Hz), 62.6, 13.0 ppm.

**HRMS (ESI):** *m/z* calculated for C<sub>27</sub>H<sub>19</sub>F<sub>3</sub>O<sub>3</sub>+Na 471.1184, found 471.1182.

**ethyl 2-formyl-3-(naphthalen-2-yl)-5-(trifluoromethyl)-[1,1'-biphenyl]-4-carboxylate**

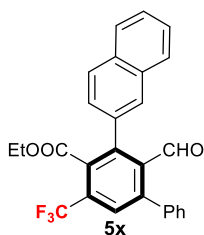

Prepared according to the general procedure using ethyl ethyl (*E*)-5-oxo-5-phenyl-3-(trifluoromethyl)pent-3-enoate (57.3 mg, 0.2 mmol) and 3-(naphthalen-2-yl)acrylaldehyde (54.7 mg, 0.3 mmol). Purification of the crude product *via* column chromatography delivered **5x** as a white solid with 72% yield (64.5 mg). m.p. 116-118 °C.

*NMR and HRMS data for the product 5x:*

**<sup>1</sup>H NMR (400 MHz, CDCl<sub>3</sub>):** δ = 9.83 (s, 1H), 7.89-7.87 (m, 2H), 7.83-7.81 (m, 1H),

7.79 (s, 1H), 7.77-7.76 (m, 1H), 7.54-7.52 (m, 2H), 7.49-7.45 (m, 3H), 7.42 (dd,  $J = 8.4, 1.6$  Hz, 1H), 7.38-7.35 (m, 2H), 3.96-3.87 (m, 2H), 0.86 (t,  $J = 7.2$  Hz, 3H) ppm.

**$^{13}\text{C}$  NMR (100 MHz,  $\text{CDCl}_3$ ):**  $\delta = 191.9, 165.9, 144.8, 142.1, 137.5, 137.0, 133.2$  (d,  $J = 2.0$  Hz), 132.9, 132.7, 132.6, 129.5 (d,  $J = 32.0$  Hz), 129.4, 129.3, 129.1, 128.7, 128.6, 128.1, 128.0 (d,  $J = 4.0$  Hz), 127.8, 127.7, 127.5, 126.8, 126.7, 122.9 (d,  $J = 273.0$  Hz), 62.0, 13.5 ppm.

**HRMS (ESI):**  $m/z$  calculated for  $\text{C}_{27}\text{H}_{19}\text{F}_3\text{O}_3 + \text{Na}$  471.1184, found 471.1181.

**ethyl 2-formyl-3-(2-methoxynaphthalen-1-yl)-5-(trifluoromethyl)-[1,1'-biphenyl]-4-carboxylate**

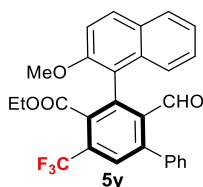

Prepared according to the general procedure using ethyl ethyl (*E*)-5-oxo-5-phenyl-3-(trifluoromethyl)pent-3-enoate (57.3 mg, 0.2 mmol) and 3-(2-methoxynaphthalen-1-yl)acrylaldehyde (63.7 mg, 0.3 mmol). Purification of the crude product *via* column chromatography delivered **5y** as a white solid with 61% yield (58.6 mg). m.p. 119-121 °C.

*NMR and HRMS data for the product 5y:*

**$^1\text{H}$  NMR (400 MHz,  $\text{CDCl}_3$ ):**  $\delta = 9.69$  (s, 1H), 7.93 (d,  $J = 8.8$  Hz, 1H), 7.83 (s, 1H), 7.80 (d,  $J = 8.0$  Hz, 1H), 7.47-7.46 (m, 3H), 7.42-7.31 (m, 5H), 7.21 (d,  $J = 8.4$  Hz, 1H), 3.86 (s, 3H), 3.73-3.64 (m, 2H), 0.55 (t,  $J = 7.2$  Hz, 3H) ppm.

**$^{13}\text{C}$  NMR (100 MHz,  $\text{CDCl}_3$ ):**  $\delta = 191.6, 165.6, 154.6, 144.8, 137.8, 137.7, 137.6, 133.9$  (d,  $J = 2.0$  Hz), 133.4, 131.0, 130.1 (d,  $J = 32.0$  Hz), 129.5, 128.6, 128.5, 128.4 (d,  $J = 4.0$  Hz), 127.9, 127.0, 124.7, 123.8, 123.0 (d,  $J = 273.0$  Hz), 117.5, 112.7, 100.0, 61.4, 56.5, 13.0 ppm.

**HRMS (ESI):**  $m/z$  calculated for  $\text{C}_{28}\text{H}_{21}\text{F}_3\text{O}_4 + \text{Na}$  501.1290, found 501.1287.

**ethyl 4-bromo-2'-formyl-5'-(trifluoromethyl)-[1,1':3',1''-terphenyl]-4'-carboxylate**

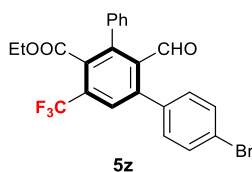

Prepared according to the general procedure using ethyl ethyl (E)-5-(4-bromophenyl)-5-oxo-3-(trifluoromethyl)pent-3-enoate (73.0 mg, 0.2 mmol) and cinnamaldehyde (39.7 mg, 0.3 mmol). Purification of the crude product *via* column chromatography delivered **5z** as a white solid with 76% yield (72.2 mg). m.p. 135-136 °C.

*NMR and HRMS data for the product 5z:*

**<sup>1</sup>H NMR (600 MHz, CDCl<sub>3</sub>):**  $\delta$  = 9.78 (s, 1H), 7.70 (s, 1H), 7.60-7.58 (m, 2H), 7.44-7.42 (m, 3H), 7.31-7.29 (m, 2H), 7.22-7.20 (m, 2H), 4.01 (q,  $J$  = 7.2 Hz, 2H), 0.99 (t,  $J$  = 7.2 Hz, 3H) ppm.

**<sup>13</sup>C NMR (150 MHz, CDCl<sub>3</sub>):**  $\delta$  = 191.8, 165.7, 143.1, 142.8, 136.7, 136.6, 134.6, 133.2, 131.7, 130.9, 129.8, 129.6 (d,  $J$  = 33.0 Hz), 128.9, 128.2, 127.9 (d,  $J$  = 4.5 Hz), 123.1, 122.7 (d,  $J$  = 273.0 Hz), 62.1, 13.5 ppm.

**HRMS (ESI):**  $m/z$  calculated for C<sub>23</sub>H<sub>16</sub>BrF<sub>3</sub>O<sub>3</sub>+Na 499.0133, found 499.0129.

**ethyl 4-fluoro-2'-formyl-5'-(trifluoromethyl)-[1,1':3',1''-terphenyl]-4'-carboxylate**

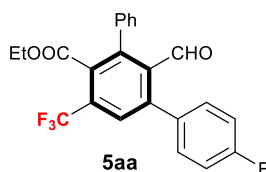

Prepared according to the general procedure using ethyl ethyl (E)-5-(4-fluorophenyl)-5-oxo-3-(trifluoromethyl)pent-3-enoate (60.9 mg, 0.2 mmol) and cinnamaldehyde (39.7 mg, 0.3 mmol). Purification of the crude product *via* column chromatography delivered **5aa** as a white solid with 74% yield (61.4 mg). m.p. 107-109 °C.

*NMR and HRMS data for the product 5aa:*



**<sup>1</sup>H NMR (600 MHz, CDCl<sub>3</sub>):** δ = 9.79 (s, 1H), 7.71 (s, 1H), 7.43-7.41 (m, 3H), 7.33-7.30 (m, 4H), 7.17-7.14 (m, 2H), 4.01 (q, *J* = 7.2 Hz, 2H), 0.99 (t, *J* = 7.2 Hz, 3H) ppm.

**<sup>13</sup>C NMR (150 MHz, CDCl<sub>3</sub>):** δ = 191.9, 165.8, 162.9 (d, *J* = 247.5 Hz), 143.3, 142.6, 136.8, 134.7, 133.6 (d, *J* = 1.5 Hz), 133.1, 131 (d, *J* = 7.5 Hz), 129.8, 129.5 (d, *J* = 31.5 Hz), 128.8, 128.2, 128.1 (d, *J* = 4.5 Hz), 122.8 (d, *J* = 273.0 Hz), 115.7 (d, *J* = 22.5 Hz), 62.1, 13.5 ppm.

**HRMS (ESI):** *m/z* calculated for C<sub>23</sub>H<sub>16</sub>F<sub>4</sub>O<sub>3</sub>+Na 439.0933, found 439.0930.

**ethyl 2'-formyl-4-methoxy-5'-(trifluoromethyl)-[1,1':3',1''-terphenyl]-4'-carboxylate**

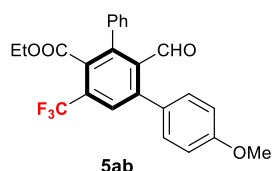

Prepared according to the general procedure using ethyl ethyl (*E*)-5-(4-methoxyphenyl)-5-oxo-3-(trifluoromethyl)pent-3-enoate (63.3 mg, 0.2 mmol) and cinnamaldehyde (39.7 mg, 0.3 mmol). Purification of the crude product *via* column chromatography delivered **5ab** as a white solid with 77% yield (66.3 mg). m.p. 77-79 °C.

*NMR and HRMS data for the product 5ab:*

**<sup>1</sup>H NMR (600 MHz, CDCl<sub>3</sub>):** δ = 9.81 (s, 1H), 7.75 (s, 1H), 7.41-7.40 (m, 3H), 7.29-7.28 (m, 4H), 7.01-6.98 (m, 2H), 3.99 (q, *J* = 7.2 Hz, 2H), 3.87 (s, 3H), 0.98 (t, *J* = 7.2 Hz, 3H) ppm.

**<sup>13</sup>C NMR (150 MHz, CDCl<sub>3</sub>):** δ = 192.3, 166.0, 160.1, 144.4, 141.9, 136.8, 135.2, 132.5, 130.9, 129.3, 129.4, 129.2 (d, *J* = 10.5 Hz), 128.5, 128.0, 127.9, 122.9 (d, *J* = 273.0 Hz), 114.2, 61.9, 55.4, 13.5 ppm.

**HRMS (ESI):** *m/z* calculated for C<sub>24</sub>H<sub>19</sub>F<sub>3</sub>O<sub>4</sub>+Na 451.4133, found 451.1134.

**ethyl 3,4-dichloro-2'-formyl-5'-(trifluoromethyl)-[1,1':3',1''-terphenyl]-4'-carboxylate**

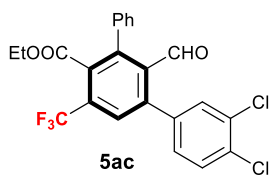

Prepared according to the general procedure using ethyl (*E*)-5-(3,4-dichlorophenyl)-5-oxo-3-(trifluoromethyl)pent-3-enoate (71.0 mg, 0.2 mmol) and cinnamaldehyde (39.7 mg, 0.3 mmol). Purification of the crude product *via* column chromatography delivered **5ac** as a white solid with 72% yield (67.1 mg). m.p. 123-124 °C.

*NMR and HRMS data for the product 5ac:*

**<sup>1</sup>H NMR (600 MHz, CDCl<sub>3</sub>):** δ = 9.78 (s, 1H), 7.67 (s, 1H), 7.52 (d, *J* = 8.4 Hz, 1H), 7.46-7.43 (m, 4H), 7.32-7.30 (m, 2H), 7.15 (dd, *J* = 8.4, 2.4 Hz, 1H), 4.02 (q, *J* = 7.2 Hz, 2H), 0.99 (t, *J* = 7.2 Hz, 3H) ppm.

**<sup>13</sup>C NMR (150 MHz, CDCl<sub>3</sub>):** δ = 191.4, 165.5, 143.3, 141.6, 138.0, 136.4, 134.2, 133.6, 133.0, 132.8, 130.9, 130.4, 129.9, 129.7, 129.1, 128.6, 128.3, 128.0 (d, *J* = 4.5 Hz), 122.6 (d, *J* = 273.0 Hz), 62.2, 13.5 ppm.

**HRMS (ESI):** *m/z* calculated for C<sub>23</sub>H<sub>15</sub>Cl<sub>2</sub>F<sub>3</sub>O<sub>3</sub>+Na 521.0510, found 521.0509.

**ethyl 6-formyl-5-(naphthalen-1-yl)-3-(trifluoromethyl)-[1,1'-biphenyl]-2-carboxylate**

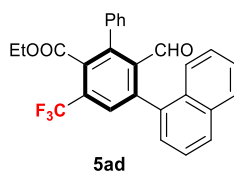

Prepared according to the general procedure using ethyl (*E*)-5-(naphthalen-1-yl)-5-oxo-3-(trifluoromethyl)pent-3-enoate (67.3 mg, 0.2 mmol) and cinnamaldehyde (39.7 mg, 0.3 mmol). Purification of the crude product *via* column chromatography delivered **5ad** as a white solid with 70% yield (54.7 mg). m.p. 96-97 °C.

*NMR and HRMS data for the product 5ad:*

**<sup>1</sup>H NMR (600 MHz, CDCl<sub>3</sub>):** δ = 9.85 (s, 1H), 7.93-7.51 (m, 5H), 7.57-7.53 (m, 2H), 7.43-7.41 (m, 4H), 7.35-7.31 (m, 2H), 4.02 (q, *J* = 7.2 Hz, 2H), 1.00 (t, *J* = 7.2 Hz, 3H)

ppm.

**<sup>13</sup>C NMR (150 MHz, CDCl<sub>3</sub>):**  $\delta$  = 192.0, 165.9, 144.7, 142.3, 136.9, 135.1, 135.0, 133.0, 132.9, 129.8, 129.5 (d,  $J$  = 33.0 Hz), 128.9, 128.6, 128.4, 128.3, 128.5, 128.1, 127.8, 127.0, 126.9, 122.9 (d,  $J$  = 273.0 Hz), 62.0, 13.5 ppm.

**HRMS (ESI):**  $m/z$  calculated for C<sub>27</sub>H<sub>19</sub>F<sub>3</sub>O<sub>3</sub>+Na 471.1184, found 471.1186.

**methyl 2'-formyl-5'-(trifluoromethyl)-[1,1':3',1''-terphenyl]-4'-carboxylate**

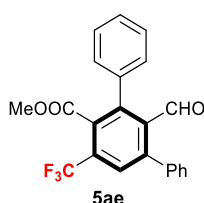

Prepared according to the general procedure using methyl (*E*)-5-oxo-5-phenyl-3-(trifluoromethyl)pent-3-enoate (54.4 mg, 0.2 mmol) and cinnamaldehyde (39.7 mg, 0.3 mmol). Purification of the crude product *via* column chromatography delivered **5ae** as a white solid with 71% yield (54.7 mg). m.p. 119-121 °C.

*NMR and HRMS data for the product 5ae:*

**<sup>1</sup>H NMR (600 MHz, CDCl<sub>3</sub>):**  $\delta$  = 9.82 (s, 1H), 7.76 (s, 1H), 7.48-7.46 (m, 3H), 7.43-7.42 (m, 3H), 7.36-7.34 (m, 2H), 7.29-7.28 (m, 2H), 3.54 (s, 3H) ppm.

**<sup>13</sup>C NMR (150 MHz, CDCl<sub>3</sub>):**  $\delta$  = 192.0, 166.4, 144.8, 142.2, 137.4, 136.8, 135.0, 132.7, 129.6, 129.4, 128.7, 128.6, 128.1, 128.0 (d,  $J$  = 4.5 Hz), 122.8 (d,  $J$  = 273.0 Hz), 52.6 ppm.

**HRMS (ESI):**  $m/z$  calculated for C<sub>22</sub>H<sub>15</sub>F<sub>3</sub>O<sub>3</sub>+Na 407.0871, found 407.0872.

**isopropyl 2'-formyl-5'-(trifluoromethyl)-[1,1':3',1''-terphenyl]-4'-carboxylate**

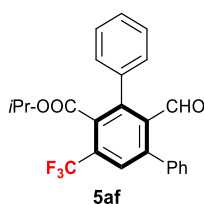

Prepared according to the general procedure using isopropyl (*E*)-5-oxo-5-phenyl-3-(trifluoromethyl)pent-3-enoate (60.1 mg, 0.2 mmol) and cinnamaldehyde (39.7 mg, 0.3 mmol). Purification of the crude product *via* column chromatography delivered **5af** as a white solid with 67% yield (55.2 mg). m.p. 102-103 °C.

*NMR and HRMS data for the product 5af:*

**<sup>1</sup>H NMR (600 MHz, CDCl<sub>3</sub>):** δ = 9.81 (s, 1H), 7.75 (s, 1H), 7.47 (m, 3H), 7.42-7.70 (m, 3H), 7.35-7.33 (m, 2H), 7.32-7.30 (m, 2H), 4.92-4.88 (m, 1H), 0.98 (d, *J* = 6.0 Hz, 6H) ppm.

**<sup>13</sup>C NMR (150 MHz, CDCl<sub>3</sub>):** δ = 192.11, 165.33, 144.5, 141.9, 137.5, 136.8, 135.0, 133.2, 129.9, 129.4, 129.2 (d, *J* = 10.5 Hz), 128.6, 128.6, 128.1, 128.0 (d, *J* = 4.5 Hz), 122.9 (d, *J* = 273.0 Hz), 70.0, 29.7, 21.1 ppm.

**HRMS (ESI):** *m/z* calculated for C<sub>24</sub>H<sub>19</sub>F<sub>3</sub>O<sub>3</sub>+Na 435.1184, found 435.1186.

### 2.3 Procedure for 7

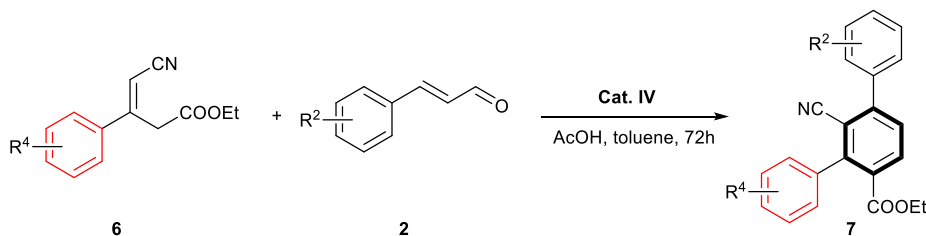

The reaction was carried out with **6** (0.20 mmol) and **2** (0.30 mmol), amine catalyst **IV** (0.05 mmol) and AcOH (0.08 mmol) in toluene (2 mL) under an open atmosphere at 70 °C for 72 h. Then the reaction mixture was concentrated and the residue was purified by flash chromatography on silica gel (petroleum ether/ethyl acetate = 80:1) to give the final diaryl substituted benzenes **7**, which was further analyzed by <sup>1</sup>H NMR, <sup>13</sup>C HMR, HRMS analysis.

#### ethyl 2'-cyano-[1,1':3',1''-terphenyl]-4'-carboxylate

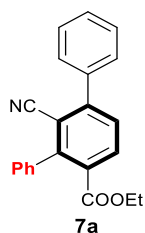

Prepared according to the general procedure using ethyl ethyl (*E*)-4-cyano-3-phenylbut-3-enoate (43.1 mg, 0.2 mmol) and cinnamaldehyde (39.7 mg, 0.3 mmol). Purification of the crude product via column chromatography delivered **7a** as a white solid with 68% yield (44.3 mg). m.p. 78-79 °C.

*NMR and HRMS data for the product 7a:*

**<sup>1</sup>H NMR (400 MHz, CDCl<sub>3</sub>):** δ = 8.08 (d, *J* = 8.0 Hz, 1H), 7.59 (dd, *J* = 12.0, 3.0 Hz, 2H), 7.59 (d, *J* = 8.0 Hz, 1H), 7.53-7.41 (m, 6H), 7.38-7.36 (m, 2H), 4.04 (q, *J* = 7.2 Hz, 2H), 0.94 (t, *J* = 7.2 Hz, 3H) ppm.

**<sup>13</sup>C NMR (100 MHz, CDCl<sub>3</sub>):** δ = 166.8, 148.9, 147.0, 137.8, 137.7, 133.3, 131.6, 129.2, 129.0, 128.9, 128.8, 128.7, 128.6, 128.2, 116.8, 113.3, 61.4, 13.5 ppm.

**HRMS (ESI):** m/z calculated for C<sub>22</sub>H<sub>17</sub>NO<sub>2</sub>+Na 350.1157, found 350.1160.

#### **ethyl 2-chloro-2'-cyano-[1,1':3',1''-terphenyl]-4'-carboxylate**

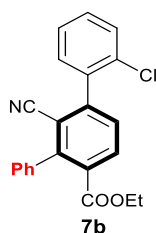

Prepared according to the general procedure using ethyl ethyl (*E*)-4-cyano-3-phenylbut-3-enoate (43.1 mg, 0.2 mmol) and 2-chlorocinnamaldehyde (50.0 mg, 0.3 mmol). Purification of the crude product *via* column chromatography delivered **7b** as a white solid with 61% yield (43.8 mg). m.p. 108-109 °C.

*NMR and HRMS data for the product 7b:*

**<sup>1</sup>H NMR (400 MHz, CDCl<sub>3</sub>):** δ = 8.08 (d, *J* = 8.0 Hz, 1H), 7.55-7.52 (m, 1H), 7.50 (d, *J* = 8.0 Hz, 1H), 7.46-7.43 (m, 3H), 7.42-7.38 (m, 5H), 4.06 (q, *J* = 7.2 Hz, 2H), 0.95

(t,  $J = 7.2$  Hz, 3H) ppm.

**$^{13}\text{C}$  NMR (100 MHz,  $\text{CDCl}_3$ ):**  $\delta = 166.8, 146.4, 146.3, 137.4, 136.7, 132.9, 132.8, 132.4, 130.9, 130.5, 130.1, 129.6, 129.0, 128.7, 128.3, 127.1, 126.1, 116.1, 61.6, 13.6$  ppm.

**HRMS (ESI):**  $m/z$  calculated for  $\text{C}_{22}\text{H}_{16}\text{ClNO}_2 + \text{Na}$  384.0767, found 384.0770.

**ethyl 3-chloro-2'-cyano-[1,1':3',1''-terphenyl]-4'-carboxylate**

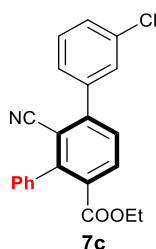

Prepared according to the general procedure using ethyl ethyl (*E*)-4-cyano-3-phenylbut-3-enoate (43.1 mg, 0.2 mmol) and 3-chlorocinnamaldehyde (50.0 mg, 0.3 mmol). Purification of the crude product *via* column chromatography delivered **7c** as a white solid with 63% yield (45.6 mg). m.p. 126-128 °C.

*NMR and HRMS data for the product 7c:*

**$^1\text{H}$  NMR (400 MHz,  $\text{CDCl}_3$ ):**  $\delta = 8.08$  (d,  $J = 8.0$  Hz, 1H), 7.56-7.55 (m, 1H), 7.53 (d,  $J = 8.4$  Hz, 1H), 7.51-7.44 (m, 6H), 7.37-7.35 (m, 2H), 4.05 (q,  $J = 7.2$  Hz, 2H), 0.94 (t,  $J = 7.2$  Hz, 3H) ppm.

**$^{13}\text{C}$  NMR (100 MHz,  $\text{CDCl}_3$ ):**  $\delta = 166.6, 147.3, 147.1, 139.4, 137.5, 134.7, 133.4, 132.2, 130.1, 129.4, 129.0, 128.9, 128.7, 128.6, 128.3, 127.2, 116.5, 113.4, 61.5, 13.5$  ppm.

**HRMS (ESI):**  $m/z$  calculated for  $\text{C}_{22}\text{H}_{16}\text{ClNO}_2 + \text{Na}$  384.0767, found 384.0768.

**ethyl 4-chloro-2'-cyano-[1,1':3',1''-terphenyl]-4'-carboxylate**

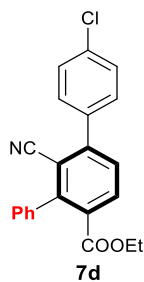

Prepared according to the general procedure using ethyl ethyl (*E*)-4-cyano-3-phenylbut-3-enoate (43.1 mg, 0.2 mmol) and 4-chlorocinnamaldehyde (50.0 mg, 0.3 mmol). Purification of the crude product *via* column chromatography delivered **7d** as a white solid with 66% yield (47.5 mg). m.p. 104-106 °C.

*NMR and HRMS data for the product 7d:*

**<sup>1</sup>H NMR (600 MHz, CDCl<sub>3</sub>):** δ = 8.09 (d, *J* = 8.4 Hz, 1H), 7.55-7.52 (m, 3H), 7.49-7.46 (m, 5H), 7.37-7.35 (m, 2H), 4.05 (q, *J* = 7.2 Hz, 2H), 0.94 (t, *J* = 7.2 Hz, 3H) ppm.

**<sup>13</sup>C NMR (150 MHz, CDCl<sub>3</sub>):** δ = 166.7, 147.6, 147.1, 137.5, 136.0, 135.6, 133.4, 131.9, 130.2, 129.1, 128.8, 128.7, 128.6, 128.3, 116.7, 113.2, 61.5, 13.5 ppm.

**HRMS (ESI):** m/z calculated for C<sub>22</sub>H<sub>16</sub>ClNO<sub>2</sub>+Na 384.0767, found 384.0771.

**ethyl 4-bromo-2'-cyano-[1,1':3',1''-terphenyl]-4'-carboxylate**

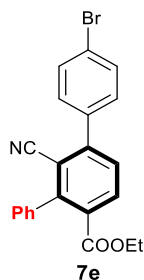

Prepared according to the general procedure using ethyl ethyl (*E*)-4-cyano-3-phenylbut-3-enoate (43.1 mg, 0.2 mmol) and 4-bromocinnamaldehyde (63.3 mg, 0.3 mmol). Purification of the crude product *via* column chromatography delivered **7e** as a white solid with 67% yield (54.3 mg). m.p. 118-120 °C.

*NMR and HRMS data for the product 7e:*

**<sup>1</sup>H NMR (600 MHz, CDCl<sub>3</sub>):** δ = 8.09 (d, *J* = 7.8 Hz, 1H), 7.66-7.64 (m, 2H), 7.53 (d,

$J = 8.4$  Hz, 1H), 7.48-7.46 (m, 5H), 7.37-7.35 (m, 2H), 4.05 (q,  $J = 7.2$  Hz, 2H), 0.94 (t,  $J = 7.2$  Hz, 3H) ppm.

**$^{13}\text{C}$  NMR (150 MHz,  $\text{CDCl}_3$ ):**  $\delta = 166.7, 147.6, 147.1, 137.5, 136.5, 133.4, 132.0, 132.0, 130.5, 128.8, 128.7, 128.6, 128.3, 123.9, 116.7, 113.2, 61.5, 13.5$  ppm.

**HRMS (ESI):**  $m/z$  calculated for  $\text{C}_{22}\text{H}_{16}\text{BrNO}_2 + \text{Na}$  428.0262, found 428.0262.

**ethyl 2'-cyano-3-fluoro-[1,1':3',1''-terphenyl]-4'-carboxylate**

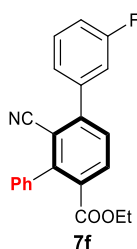

Prepared according to the general procedure using ethyl ethyl (*E*)-4-cyano-3-phenylbut-3-enoate (43.1 mg, 0.2 mmol) and 3-fluorocinnamaldehyde (45.1 mg, 0.3 mmol). Purification of the crude product *via* column chromatography delivered **7f** as a white solid with 65% yield (44.7 mg). m.p. 72-74 °C.

*NMR and HRMS data for the product 7f:*

**$^1\text{H}$  NMR (600 MHz,  $\text{CDCl}_3$ ):**  $\delta = 8.09$  (d,  $J = 7.8$  Hz, 1H), 7.55 (d,  $J = 7.8$  Hz, 1H), 7.49-7.47 (m, 4H), 7.38-7.36 (m, 3H), 7.30-7.28 (m, 1H), 7.20-7.17 (m, 1H), 4.05 (q,  $J = 7.2$  Hz, 2H), 0.94 (t,  $J = 7.2$  Hz, 3H) ppm.

**$^{13}\text{C}$  NMR (150 MHz,  $\text{CDCl}_3$ ):**  $\delta = 166.7, 162.6$  (d,  $J = 246.0$  Hz), 147.4 (d,  $J = 1.5$  Hz), 147.1, 139.7 (d,  $J = 7.5$  Hz), 137.5, 133.4, 132.1, 130.5 (d,  $J = 9.0$  Hz), 128.8 (d,  $J = 33.0$  Hz), 128.7, 128.3, 124.8 (d,  $J = 3.0$  Hz), 116.5, 116.3, 116.2 (d,  $J = 3.0$  Hz), 116.0, 113.3, 61.6, 13.5 ppm.

**HRMS (ESI):**  $m/z$  calculated for  $\text{C}_{22}\text{H}_{16}\text{FNO}_2 + \text{Na}$  368.1063, found 368.1064.

**ethyl 2'-cyano-4-fluoro-[1,1':3',1''-terphenyl]-4'-carboxylate**



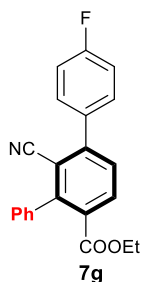

Prepared according to the general procedure using ethyl ethyl (*E*)-4-cyano-3-phenylbut-3-enoate (43.1 mg, 0.2 mmol) and 4-fluorocinnamaldehyde (45.1 mg, 0.3 mmol). Purification of the crude product *via* column chromatography delivered **7g** as a white solid with 64% yield (44.1 mg). m.p. 70-72 °C.

*NMR and HRMS data for the product 7g:*

**<sup>1</sup>H NMR (600 MHz, CDCl<sub>3</sub>):** δ = 8.08 (d, *J* = 7.8 Hz, 1H), 7.58 (dd, *J* = 9.0, 4.8 Hz, 2H), 7.54 (d, *J* = 8.4 Hz, 1H), 7.47-7.46 (m, 3H), 7.37-7.36 (m, 2H), 7.22-7.19 (m, 2H), 4.05 (q, *J* = 7.2 Hz, 2H), 0.94 (t, *J* = 7.2 Hz, 3H) ppm.

**<sup>13</sup>C NMR (150 MHz, CDCl<sub>3</sub>):** δ = 166.7, 163.4 (d, *J* = 247.5 Hz), 147.8, 147.1, 137.6, 133.7 (d, *J* = 3.0 Hz), 133.4, 131.7, 130.9, 130.8, 128.9, 128.7, 128.6, 128.3, 116.8, 116.0, 115.9, 113.3, 61.5, 13.5 ppm.

**HRMS (ESI):** *m/z* calculated for C<sub>22</sub>H<sub>16</sub>FNO<sub>2</sub>+Na 368.1063, found 368.1060.

**ethyl 2'-cyano-4-methyl-[1,1':3',1''-terphenyl]-4'-carboxylate**

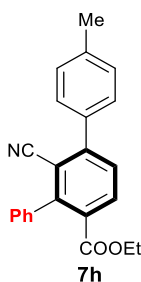

Prepared according to the general procedure using ethyl ethyl (*E*)-4-cyano-3-phenylbut-3-enoate (43.1 mg, 0.2 mmol) and 4-methylcinnamaldehyde (43.9 mg, 0.3 mmol). Purification of the crude product *via* column chromatography delivered **7h** as a white solid with 72% yield (49.2 mg). m.p. 81-82 °C.

*NMR and HRMS data for the product 7h:*

**<sup>1</sup>H NMR (400 MHz, CDCl<sub>3</sub>):** δ = 8.06 (d, *J* = 8.0 Hz, 1H), 7.54 (d, *J* = 8.4 Hz, 1H), 7.50-7.48 (m, 2H), 7.46-7.43 (m, 3H), 7.37-7.35 (m, 2H), 7.31-7.29 (m, 2H), 4.04 (q, *J* = 7.2 Hz, 2H), 2.42 (s, 3H), 0.93 (t, *J* = 7.2 Hz, 3H) ppm.

**<sup>13</sup>C NMR (100 MHz, CDCl<sub>3</sub>):** δ = 166.8, 149.0, 147.0, 139.3, 137.9, 134.8, 133.2, 131.3, 129.5, 128.9, 128.8, 128.7, 128.6, 128.2, 117.0, 113.2, 61.4, 21.3, 13.5 ppm.

**HRMS (ESI):** *m/z* calculated for C<sub>23</sub>H<sub>19</sub>NO<sub>2</sub>+Na 364.1313, found 364.1313

**ethyl 2'-cyano-2-methoxy-[1,1':3',1''-terphenyl]-4'-carboxylate**

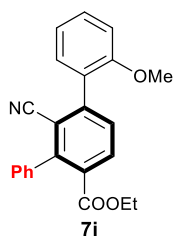

Prepared according to the general procedure using ethyl ethyl (*E*)-4-cyano-3-phenylbut-3-enoate (43.1 mg, 0.2 mmol) and 2-methoxycinnamaldehyde (48.7 mg, 0.3 mmol). Purification of the crude product *via* column chromatography delivered **7i** as a white solid with 70% yield (50.3 mg). m.p. 158-160 °C.

*NMR and HRMS data for the product 7i:*

**<sup>1</sup>H NMR (600 MHz, CDCl<sub>3</sub>):** δ = 8.06 (d, *J* = 8.4 Hz, 1H), 7.51 (d, *J* = 8.4 Hz, 1H), 7.47-7.42 (m, 4H), 7.38 (d, *J* = 7.2 Hz, 1H), 7.30 (dd, *J* = 7.8, 1.2 Hz, 1H), 7.07 (t, *J* = 7.2 Hz, 1H), 7.03 (d, *J* = 7.2 Hz, 1H), 4.04 (q, *J* = 7.2 Hz, 2H), 3.85 (s, 3H), 0.94 (t, *J* = 7.8 Hz, 3H) ppm.

**<sup>13</sup>C NMR (150 MHz, CDCl<sub>3</sub>):** δ = 167.0, 156.4, 146.2, 146.0, 137.8, 132.9, 131.4, 130.8, 130.7, 129.8, 128.8, 128.5, 128.2, 126.8, 120.8, 116.8, 115.2, 111.3, 61.4, 55.5, 13.5 ppm.

**HRMS (ESI):** *m/z* calculated for C<sub>23</sub>H<sub>19</sub>NO<sub>3</sub>+Na 380.1263, found 380.1261.

**ethyl 2'-cyano-4-methoxy-[1,1':3',1''-terphenyl]-4'-carboxylate**

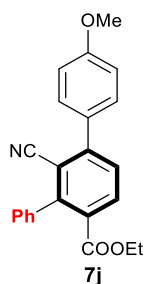

Prepared according to the general procedure using ethyl ethyl (*E*)-4-cyano-3-phenylbut-3-enoate (43.1 mg, 0.2 mmol) and 4-methoxycinnamaldehyde (48.7 mg, 0.3 mmol). Purification of the crude product *via* column chromatography delivered **7j** as a white solid with 74% yield (52.6 mg). m.p. 98-100 °C.

*NMR and HRMS data for the product 7j:*

**<sup>1</sup>H NMR (400 MHz, CDCl<sub>3</sub>):** δ = 8.06 (d, *J* = 8.4 Hz, 1H), 7.57-7.52 (m, 3H), 7.49-7.43 (m, 3H), 7.38-7.35 (m, 2H), 7.05-7.00 (m, 2H), 4.04 (q, *J* = 7.2 Hz, 2H), 3.86 (s, 3H), 0.94 (t, *J* = 7.2 Hz, 3H) ppm.

**<sup>13</sup>C NMR (100 MHz, CDCl<sub>3</sub>):** δ = 166.8, 160.5, 148.6, 147.1, 137.9, 133.3, 131.1, 130.3, 130.0, 128.8, 128.7, 128.6, 128.2, 117.1, 114.3, 113.1, 61.4, 55.4, 13.5 ppm.

**HRMS (ESI):** m/z calculated for C<sub>23</sub>H<sub>19</sub>NO<sub>3</sub>+Na 380.1263, found 380.1264.

**ethyl 2-chloro-2'-cyano-5-fluoro-[1,1':3',1''-terphenyl]-4'-carboxylate**

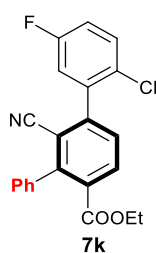

Prepared according to the general procedure using ethyl ethyl (*E*)-4-cyano-3-phenylbut-3-enoate (43.1 mg, 0.2 mmol) and 3-(2-chloro-5-fluorophenyl)acrylaldehyde (55.4 mg, 0.3 mmol). Purification of the crude product *via* column chromatography delivered **7k** as a white solid with 62% yield (47.4 mg). m.p. 132-134 °C.

*NMR and HRMS data for the product 7k:*

**<sup>1</sup>H NMR (600 MHz, CDCl<sub>3</sub>):** δ = 8.10 (d, *J* = 7.8 Hz, 1H), 7.50-7.45 (m, , 5H), 7.38-7.33 (m, 2H), 7.14-7.11 (m, 2H), 4.07 (q, *J* = 7.2 Hz, 2H), 0.95 (t, *J* = 7.2 Hz, 3H) ppm.

**<sup>13</sup>C NMR (100 MHz, CDCl<sub>3</sub>):** δ = 166.7, 161.0 (d, *J* = 165.0 Hz), 146.4, 145.1, 138.1 (d, *J* = 5.0 Hz), 137.2, 133.1, 132.8, 131.5 (d, *J* = 5.0 Hz), 129.3, 128.8, 128.7 (d, *J* = 5.0 Hz), 128.3, 128.0 (d, *J* = 2.0 Hz), 118.0 (d, *J* = 16.0 Hz), 117.7 (d, *J* = 14.0 Hz), 115.8, 114.8, 61.6, 13.5 ppm.

**HRMS (ESI):** *m/z* calculated for C<sub>22</sub>H<sub>15</sub>ClFNO<sub>2</sub>+Na 402.0673, found 402.0674.

**ethyl 2'-cyano-4''-fluoro-4-methoxy-[1,1':3',1''-terphenyl]-4'-carboxylate**

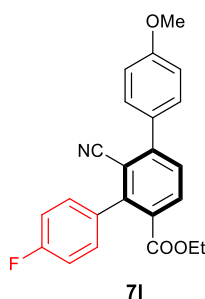

Prepared according to the general procedure using ethyl ethyl (*E*)-4-cyano-3-(4-fluorophenyl)but-3-enoate (46.7 mg, 0.2 mmol) and 4-methoxycinnamaldehyde (48.7 mg, 0.3 mmol). Purification of the crude product *via* column chromatography delivered **71** as a white solid with 71% yield (53.5 mg). m.p. 127-128 °C.

*NMR and HRMS data for the product 71:*

**<sup>1</sup>H NMR (600 MHz, CDCl<sub>3</sub>):** δ = 8.08 (d, *J* = 7.8 Hz, 1H), 7.55-7.53 (m, 3H), 7.36-7.33 (m, 2H), 7.18-7.15 (m, 2H), 7.04-7.02 (m, 2H), 4.08 (q, *J* = 7.2 Hz, 2H), 3.87 (s, 3H), 1.02 (t, *J* = 7.2 Hz, 3H) ppm.

**<sup>13</sup>C NMR (150 MHz, CDCl<sub>3</sub>):** δ = 166.5, 162.9 (d, *J* = 247.5 Hz), 160.5, 148.7, 146.1, 133.9, 133.5, 130.9, 130.5 (d, *J* = 7.5 Hz), 130.3, 129.8, 129.1, 117.1, 115.4 (d, *J* = 7.5 Hz), 114.3, 113.2, 61.5, 55.4, 13.7 ppm.

**HRMS (ESI):** *m/z* calculated for C<sub>22</sub>H<sub>16</sub>FNO<sub>2</sub>+Na 398.1168, found 398.1165.

### ethyl 2'-cyano-4''-nitro-[1,1':3',1''-terphenyl]-4'-carboxylate

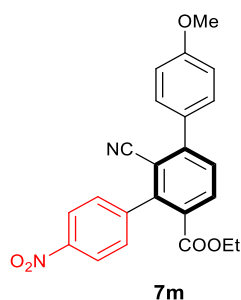

Prepared according to the general procedure using ethyl ethyl (*E*)-4-cyano-3-(4-nitrophenyl)but-3-enoate (52.1 mg, 0.2 mmol) and 4-methoxycinnamaldehyde (48.7 mg, 0.3 mmol). Purification of the crude product *via* column chromatography delivered **7m** as a white solid with 69% yield (52.1 mg). m.p. 162-163 °C.

*NMR and HRMS data for the product 7m:*

**<sup>1</sup>H NMR (600 MHz, CDCl<sub>3</sub>):** δ = 8.36-8.34 (m, 2H), 8.23 (d, *J* = 7.8 Hz, 1H), 7.64 (d, *J* = 7.8 Hz, 1H), 7.57-7.53 (m, 5H), 7.05-7.03 (m, 2H), 4.11 (q, *J* = 7.2 Hz, 2H), 3.88 (s, 3H), 1.06 (t, *J* = 7.2 Hz, 3H) ppm.

**<sup>13</sup>C NMR (150 MHz, CDCl<sub>3</sub>):** δ = 165.4, 160.8, 149.2, 147.8, 145.3, 144.9, 134.1, 130.3, 129.9, 129.6, 129.3, 123.5, 116.6, 114.4, 112.8, 61.7, 55.4, 13.7 ppm.

HRMS (ESI): *m/z* calculated for C<sub>22</sub>H<sub>16</sub>FNO<sub>2</sub>+Na 425.1113, found 425.1118.

## 3. Synthetic transformations of **5a**

### 3.1 Procedure of terminal alkyne **8**

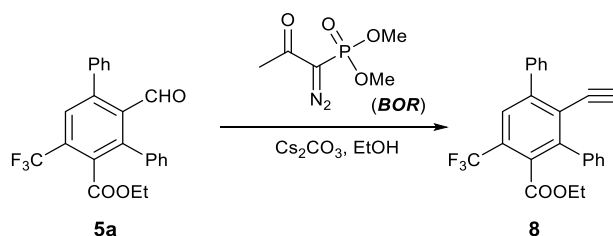

To a solution of **5a** (39.8 mg, 0.10 mmol) in ethyl alcohol (2 mL) was added BOR (48.0 mg, 0.2 mmol) and Cs<sub>2</sub>CO<sub>3</sub> (97.7 mg, 0.30 mmol). The mixture was stirred at room temperature. When the reaction was complete (based on TLC monitoring), the reaction mixture was concentrated and the residue was purified by flash

chromatography on silica gel (petroleum ether/ethyl acetate = 6:1) to give **8** as a white solid in 83% yield (32.7 mg). m.p. 78-79 °C.

*NMR and HRMS data for the product 8:*

**<sup>1</sup>H NMR (600 MHz, CDCl<sub>3</sub>):** δ = 7.69 (s, 1H), 7.59-7.58 (m, 2H), 7.48-7.43 (m, 3H), 7.41-7.37 (m, 5H), 4.00 (q, *J* = 7.2 Hz, 2H), 2.99 (s, 1H), 0.97 (t, *J* = 7.2 Hz, 3H) ppm.

**<sup>13</sup>C NMR (100 MHz, CDCl<sub>3</sub>):** δ = 166.3, 146.4, 144.8, 138.8, 137.3, 131.5, 129.5, 129.2, 128.5, 128.3, 128.2, 127.8, 126.7 (d, *J* = 33.0 Hz), 129.3 (d, *J* = 4.5 Hz), 124.6, 123.2 (d, *J* = 271.5 Hz), 87.5, 80.0, 61.8, 13.5 ppm.

**HRMS (ESI):** *m/z* calculated for C<sub>23</sub>H<sub>17</sub>F<sub>3</sub>O<sub>3</sub>+Na 417.1078, found 417.1079.

### 3.2 Procedure of CF<sub>3</sub>-functionalized multi-substituted benzene-bridged Zidovudine **9**

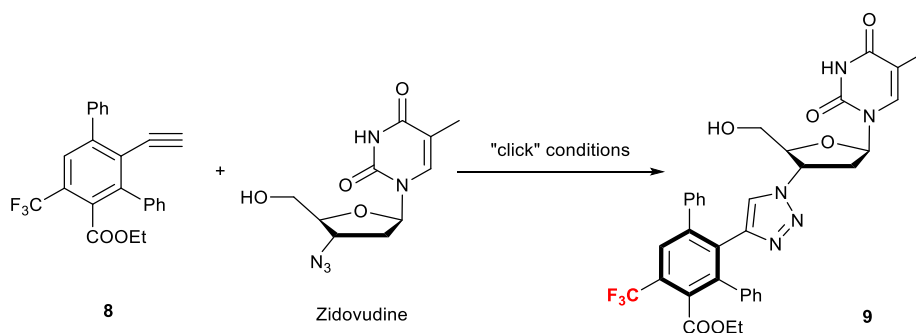

To a solution of **8** (39.4 mg, 0.10 mmol) in THF (1.0 mL) was added Zidovudine (26.7 mg, 0.10 mmol), a freshly prepared solution of CuSO<sub>4</sub>•5H<sub>2</sub>O (25.0 mg, 0.10 mmol) and sodium ascorbate (19.8 mg, 0.10 mmol) in H<sub>2</sub>O (1.0 mL). When the reaction was complete (based on TLC monitoring), the reaction mixture was concentrated and the residue was purified by flash chromatography on silica gel (petroleum ether/ethyl acetate = 6:1) to give **9** as a white solid in 81% yield (53.6 mg). m.p. 153-154 °C.

*NMR and HRMS data for the product 9:*

**<sup>1</sup>H NMR (400 MHz, CDCl<sub>3</sub>):** δ = 8.81 (s, 1H), 7.79 (s, 1H), 7.25-7.16 (m, 10H), 7.11-7.09 (m, 1H), 6.83 (s, 1H), 5.97 (t, *J* = 6.8 Hz, 1H), 5.11-5.06 (m, 1H), 4.00 (q, *J* = 7.2 Hz, 2H), 3.87-3.85 (m, 1H), 3.78 (dd, *J* = 12.4, 2.0 Hz, 1H), 3.33 (dd, *J* = 12.4, 2.0 Hz, 1H), 2.96 (br, 1H), 2.81-2.64 (m, 2H), 1.89 (s, 3H), 0.96 (t, *J* = 7.2 Hz, 3H) ppm.

**<sup>13</sup>C NMR (100 MHz, CDCl<sub>3</sub>):**  $\delta$  = 166.5, 163.4, 150.2, 144.4, 144.0, 142.1, 139.5, 137.9, 137.2, 132.8, 132.0, 130.0 (d,  $J$  = 6.0 Hz), 129.4, 128.1, 127.7 (d,  $J$  = 2.0 Hz), 127.6 (d,  $J$  = 3.0 Hz), 127.0 (d,  $J$  = 4.0 Hz), 123.7, 123.4 (d,  $J$  = 273.0 Hz), 111.3, 89.1, 85.3, 61.8, 61.2, 58.6, 36.7, 31.6, 22.7, 14.1, 13.5, 12.4 ppm.

**HRMS (ESI):**  $m/z$  calculated for C<sub>34</sub>H<sub>30</sub>F<sub>3</sub>N<sub>5</sub>O<sub>6</sub>+Na 684.2046, found 684.2047.

#### 4. Crystal data of 3a

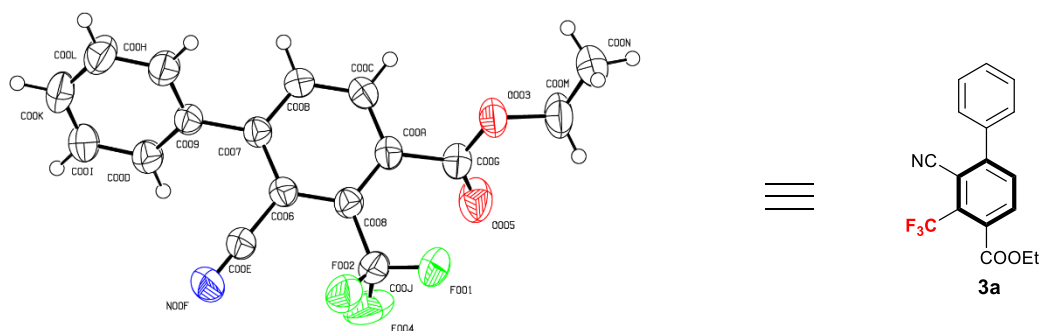

|                                             |                                                                |
|---------------------------------------------|----------------------------------------------------------------|
| Empirical formula                           | C <sub>17</sub> H <sub>12</sub> F <sub>3</sub> NO <sub>2</sub> |
| Formula weight                              | 319.28                                                         |
| Temperature/K                               | 293(2)                                                         |
| Crystal system                              | triclinic                                                      |
| Space group                                 | P-1                                                            |
| a/Å                                         | 7.9917(5)                                                      |
| b/Å                                         | 8.3050(6)                                                      |
| c/Å                                         | 11.8750(7)                                                     |
| α/°                                         | 107.623(6)                                                     |
| β/°                                         | 97.098(5)                                                      |
| γ/°                                         | 91.682(5)                                                      |
| Volume/Å <sup>3</sup>                       | 743.55(9)                                                      |
| Z                                           | 2                                                              |
| ρ <sub>calc</sub> /cm <sup>3</sup>          | 1.426                                                          |
| μ/mm <sup>-1</sup>                          | 1.025                                                          |
| F(000)                                      | 328.0                                                          |
| Crystal size/mm <sup>3</sup>                | 0.8 × 0.6 × 0.5                                                |
| Radiation                                   | CuKα (λ = 1.54184)                                             |
| 2θ range for data collection/°              | 11.186 to 145.5                                                |
| Index ranges                                | -9 ≤ h ≤ 9, -10 ≤ k ≤ 10, -9 ≤ l ≤ 14                          |
| Reflections collected                       | 6956                                                           |
| Independent reflections                     | 2880 [R <sub>int</sub> = 0.0222, R <sub>sigma</sub> = 0.0211]  |
| Data/restraints/parameters                  | 2880/0/209                                                     |
| Goodness-of-fit on F <sup>2</sup>           | 1.038                                                          |
| Final R indexes [I ≥ 2σ (I)]                | R <sub>1</sub> = 0.0570, wR <sub>2</sub> = 0.1626              |
| Final R indexes [all data]                  | R <sub>1</sub> = 0.0624, wR <sub>2</sub> = 0.1702              |
| Largest diff. peak/hole / e Å <sup>-3</sup> | 0.27/-0.32                                                     |



## 5. Crystal data of 5a

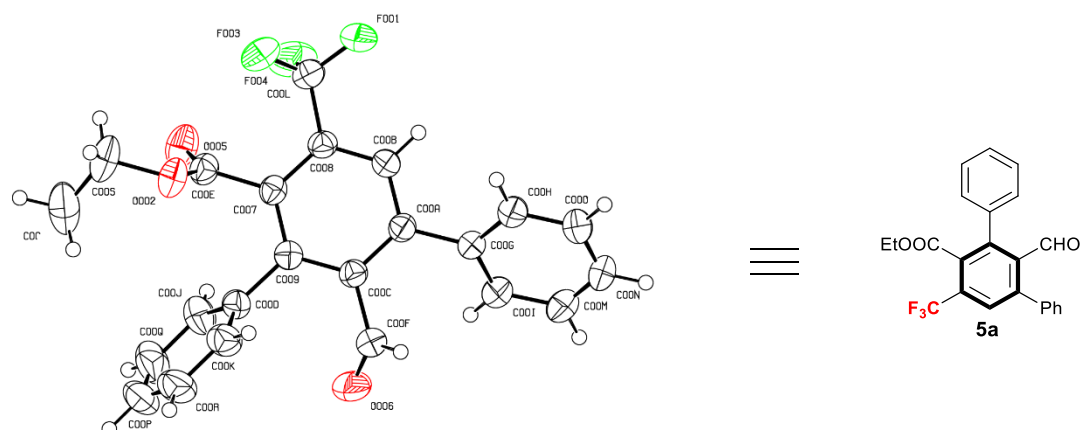

|                                             |                                                               |
|---------------------------------------------|---------------------------------------------------------------|
| Empirical formula                           | C <sub>23</sub> H <sub>17</sub> F <sub>3</sub> O <sub>3</sub> |
| Formula weight                              | 398.36                                                        |
| Temperature/K                               | 293.8(2)                                                      |
| Crystal system                              | orthorhombic                                                  |
| Space group                                 | Pbca                                                          |
| a/Å                                         | 17.2218(6)                                                    |
| b/Å                                         | 13.2420(4)                                                    |
| c/Å                                         | 17.2998(5)                                                    |
| α/°                                         | 90                                                            |
| β/°                                         | 90                                                            |
| γ/°                                         | 90                                                            |
| Volume/Å <sup>3</sup>                       | 3945.3(2)                                                     |
| Z                                           | 8                                                             |
| ρ <sub>calc</sub> /cm <sup>3</sup>          | 1.341                                                         |
| μ/mm <sup>-1</sup>                          | 0.909                                                         |
| F(000)                                      | 1648.0                                                        |
| Crystal size/mm <sup>3</sup>                | 0.75 × 0.6 × 0.5                                              |
| Radiation                                   | CuKα (λ = 1.54184)                                            |
| 2θ range for data collection/°              | 9.856 to 144.854                                              |
| Index ranges                                | -21 ≤ h ≤ 13, -10 ≤ k ≤ 16, -13 ≤ l ≤ 21                      |
| Reflections collected                       | 11346                                                         |
| Independent reflections                     | 3809 [R <sub>int</sub> = 0.0276, R <sub>sigma</sub> = 0.0225] |
| Data/restraints/parameters                  | 3809/0/263                                                    |
| Goodness-of-fit on F <sup>2</sup>           | 1.085                                                         |
| Final R indexes [I ≥ 2σ (I)]                | R <sub>1</sub> = 0.0650, wR <sub>2</sub> = 0.1607             |
| Final R indexes [all data]                  | R <sub>1</sub> = 0.0739, wR <sub>2</sub> = 0.1709             |
| Largest diff. peak/hole / e Å <sup>-3</sup> | 0.30/-0.53                                                    |

## 6. Crystal data of 7e

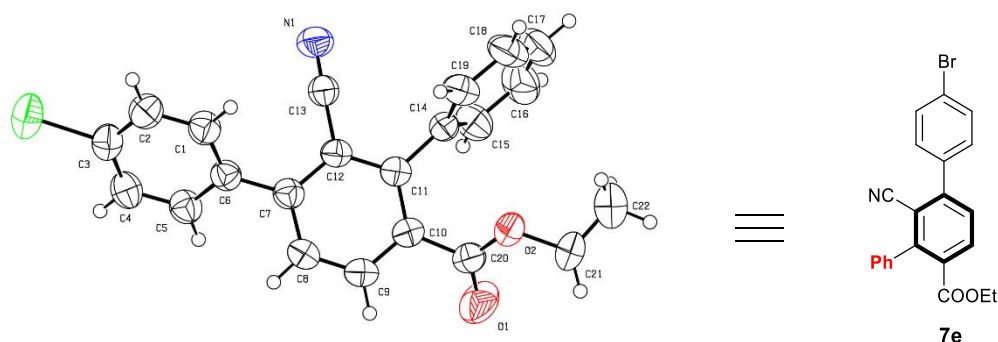

|                                             |                                                               |
|---------------------------------------------|---------------------------------------------------------------|
| Empirical formula                           | C <sub>22</sub> H <sub>15</sub> BrNO <sub>2</sub>             |
| Formula weight                              | 405.26                                                        |
| Temperature/K                               | 292.4(5)                                                      |
| Crystal system                              | monoclinic                                                    |
| Space group                                 | I2/a                                                          |
| a/Å                                         | 15.8840(6)                                                    |
| b/Å                                         | 7.2300(2)                                                     |
| c/Å                                         | 32.8613(11)                                                   |
| α/°                                         | 90                                                            |
| β/°                                         | 90.675(3)                                                     |
| γ/°                                         | 90                                                            |
| Volume/Å <sup>3</sup>                       | 3773.5(2)                                                     |
| Z                                           | 8                                                             |
| ρ <sub>calc</sub> /cm <sup>3</sup>          | 1.427                                                         |
| μ/mm <sup>-1</sup>                          | 3.089                                                         |
| F(000)                                      | 1640.0                                                        |
| Crystal size/mm <sup>3</sup>                | 0.6 × 0.4 × 0.3                                               |
| Radiation                                   | CuKα (λ = 1.54184)                                            |
| 2θ range for data collection/°              | 10.77 to 145.068                                              |
| Index ranges                                | -19 ≤ h ≤ 16, -5 ≤ k ≤ 8, -36 ≤ l ≤ 40                        |
| Reflections collected                       | 10640                                                         |
| Independent reflections                     | 3658 [R <sub>int</sub> = 0.0337, R <sub>sigma</sub> = 0.0270] |
| Data/restraints/parameters                  | 3658/0/236                                                    |
| Goodness-of-fit on F <sup>2</sup>           | 1.022                                                         |
| Final R indexes [I ≥ 2σ (I)]                | R <sub>1</sub> = 0.0582, wR <sub>2</sub> = 0.1593             |
| Final R indexes [all data]                  | R <sub>1</sub> = 0.0641, wR <sub>2</sub> = 0.1688             |
| Largest diff. peak/hole / e Å <sup>-3</sup> | 0.47/-0.75                                                    |

## 7. NMR spectra

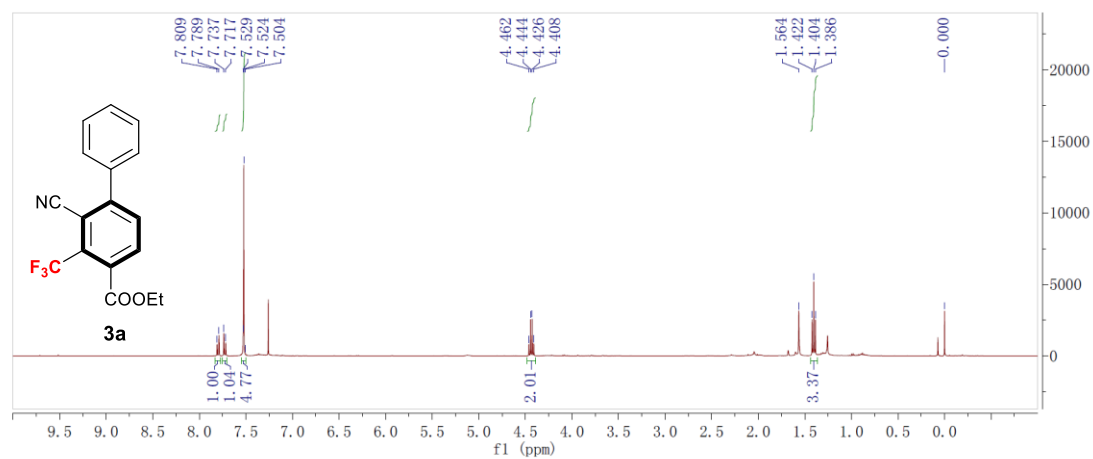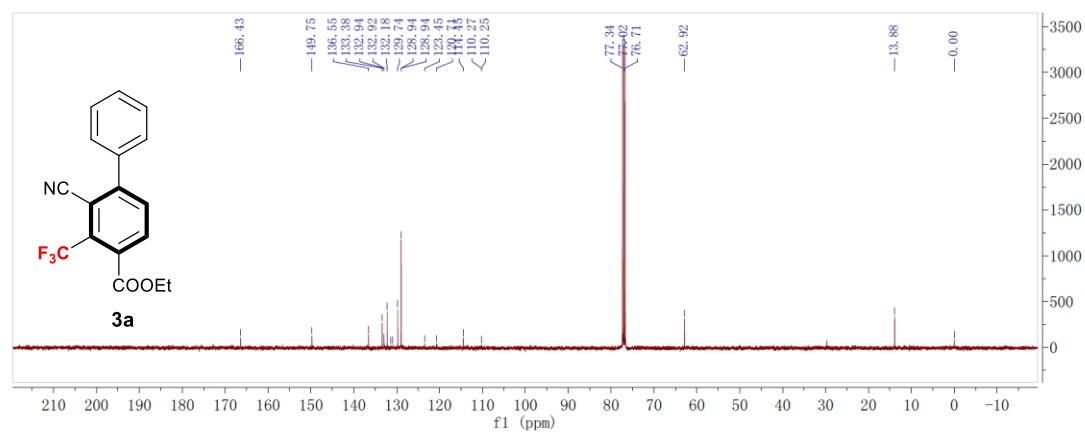

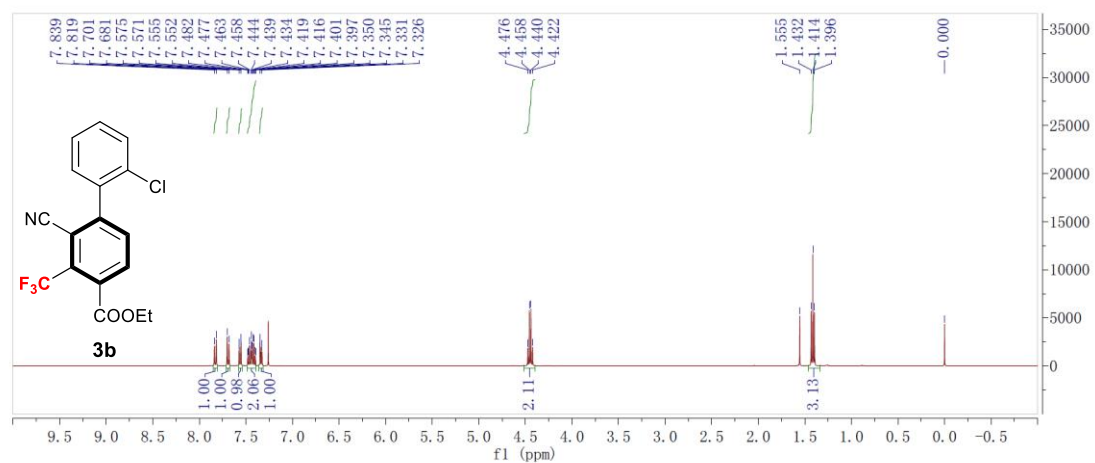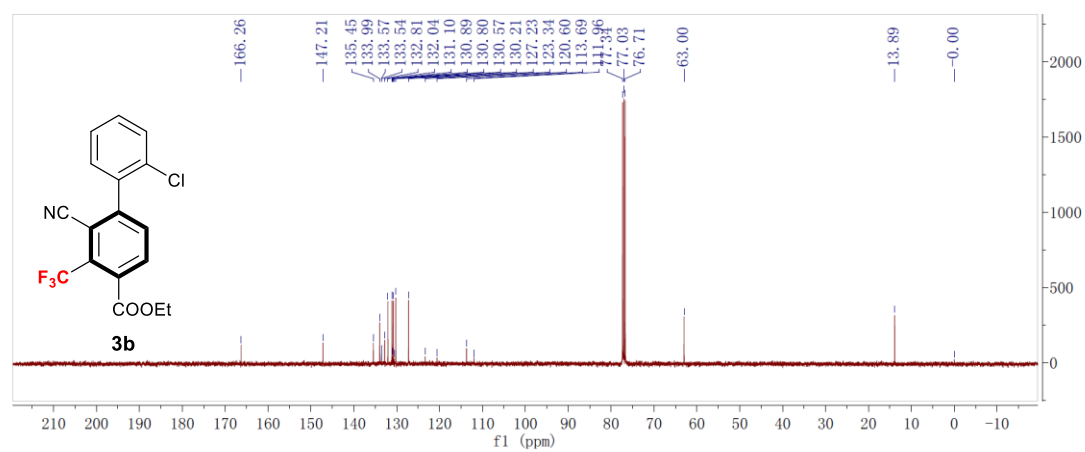

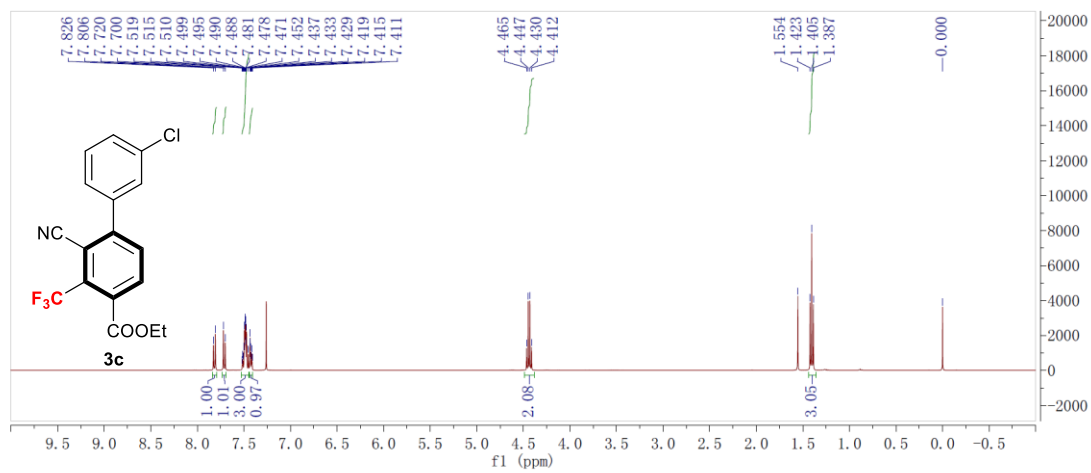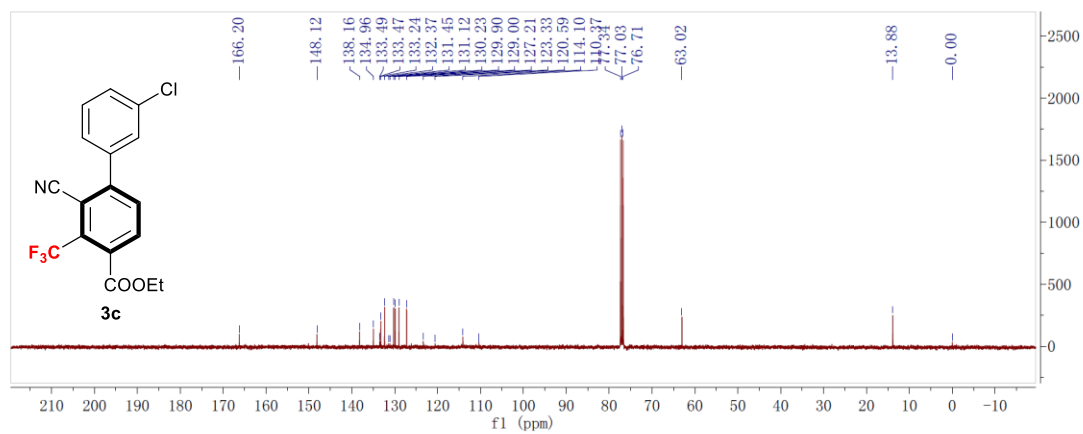

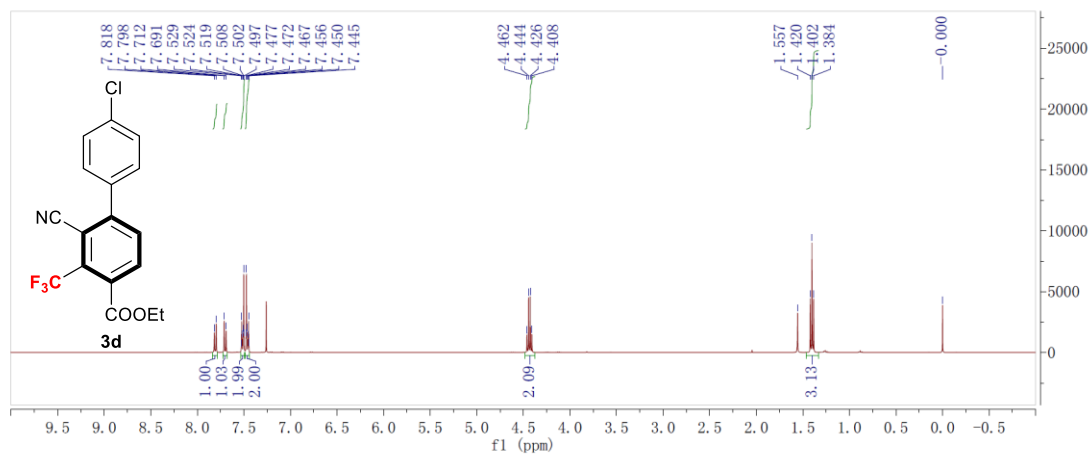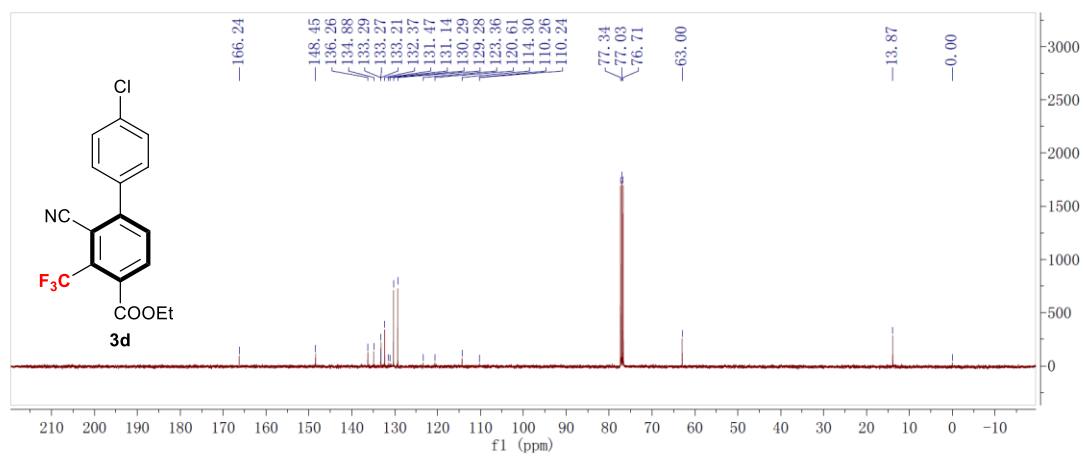

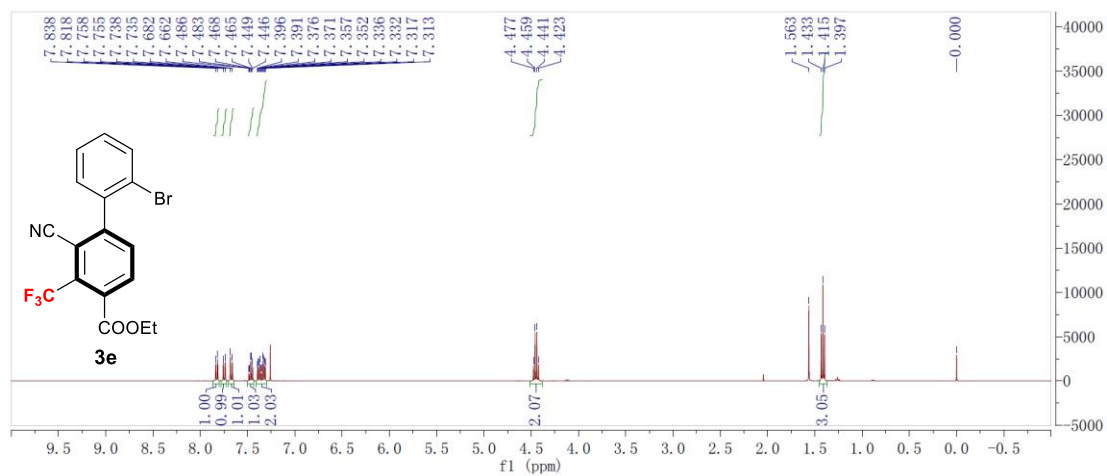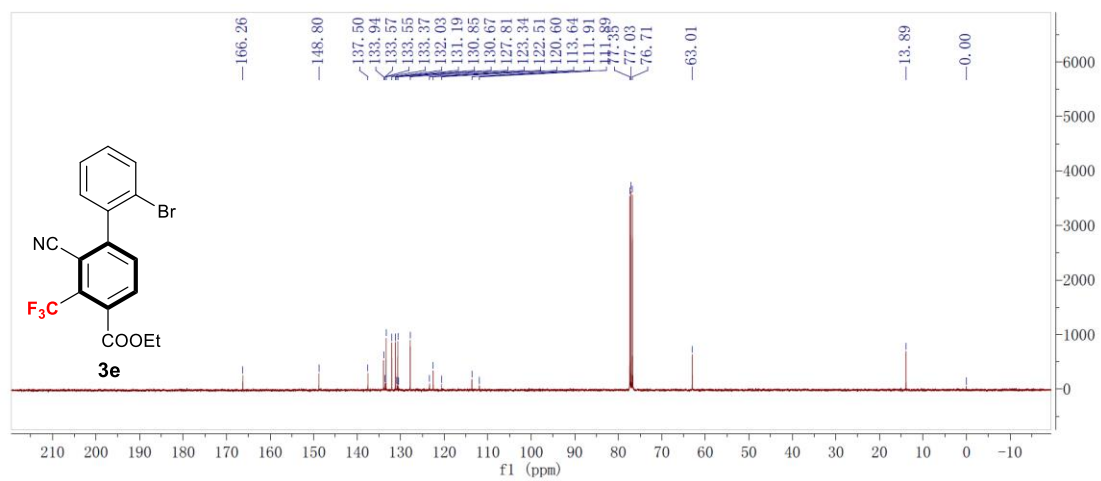

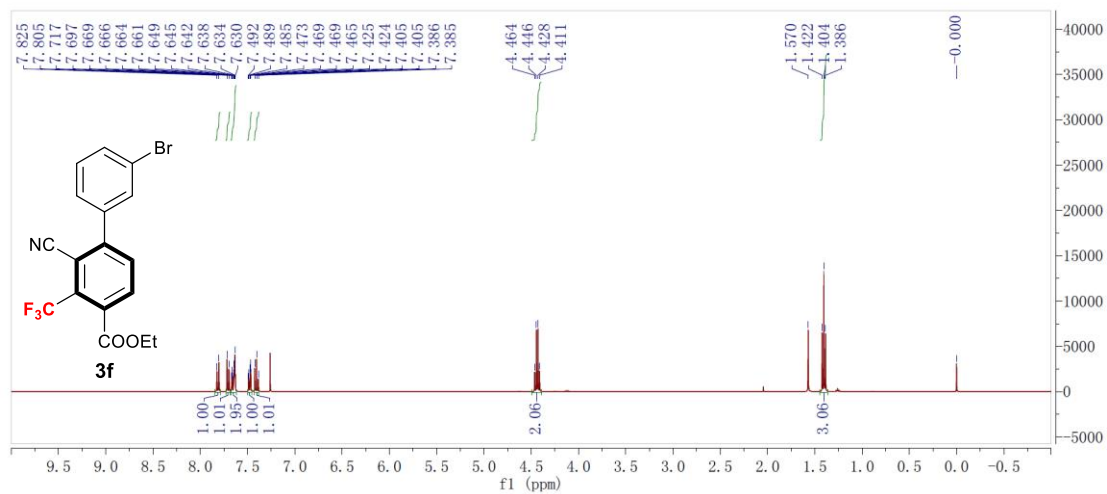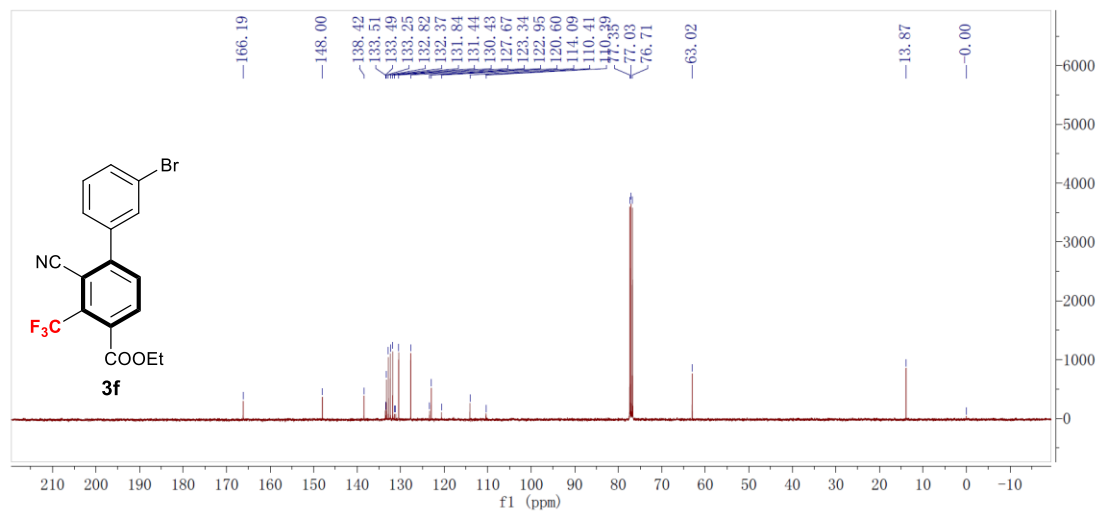



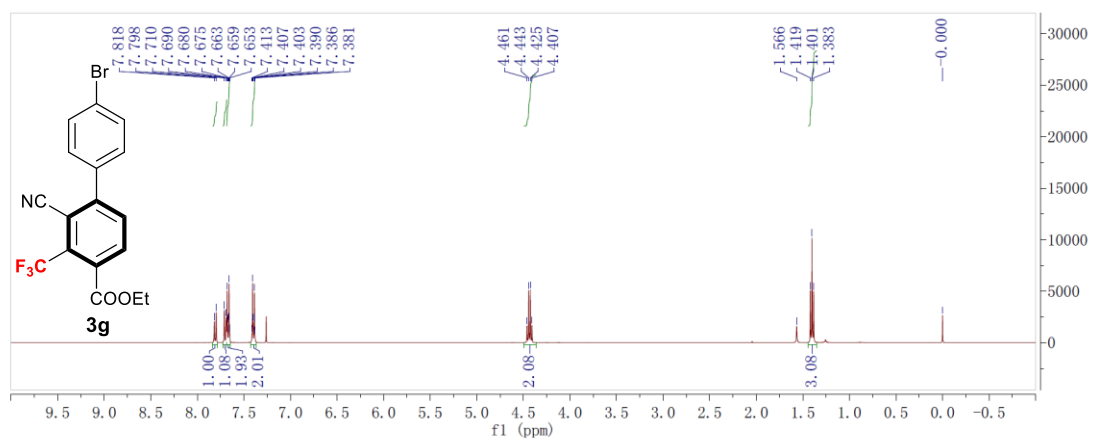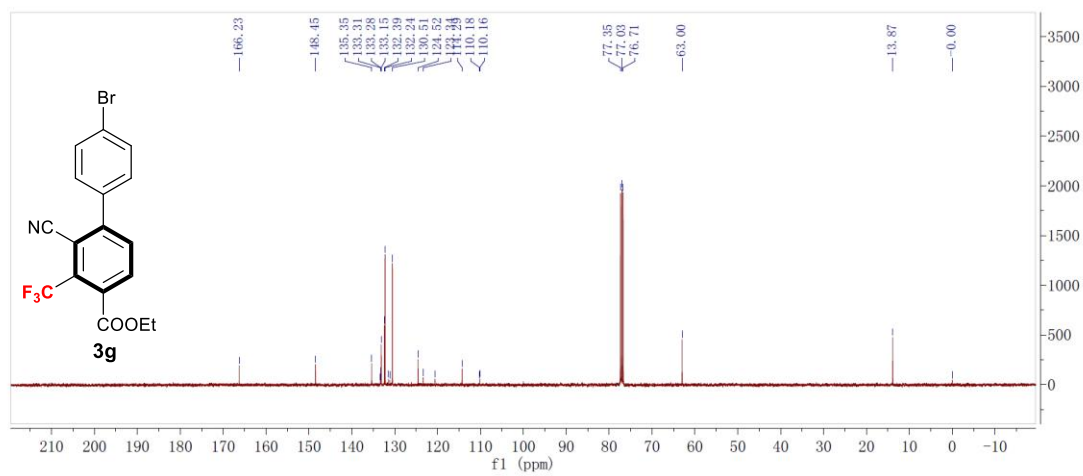

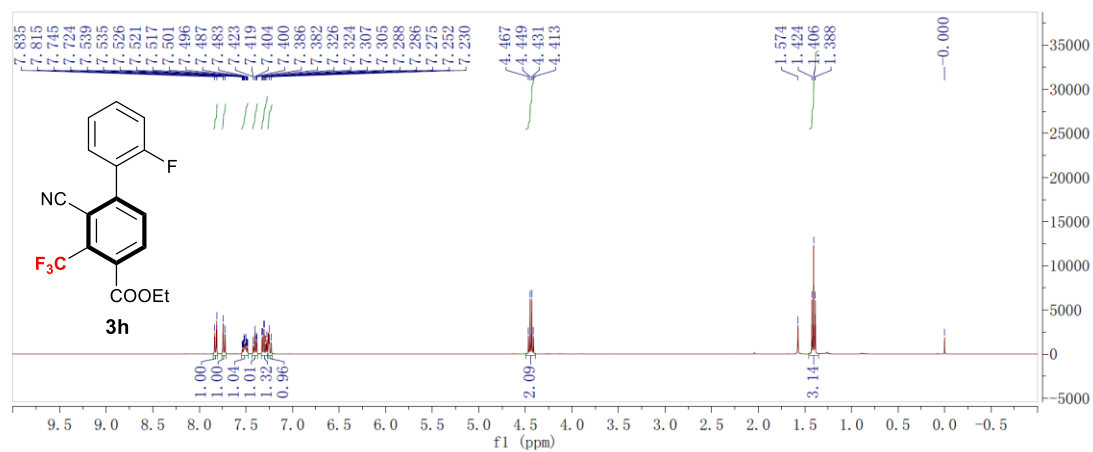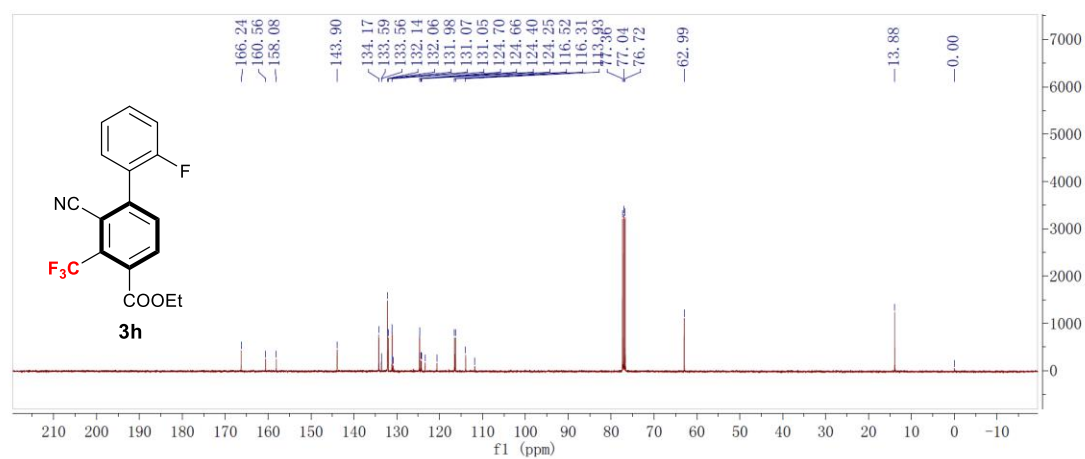

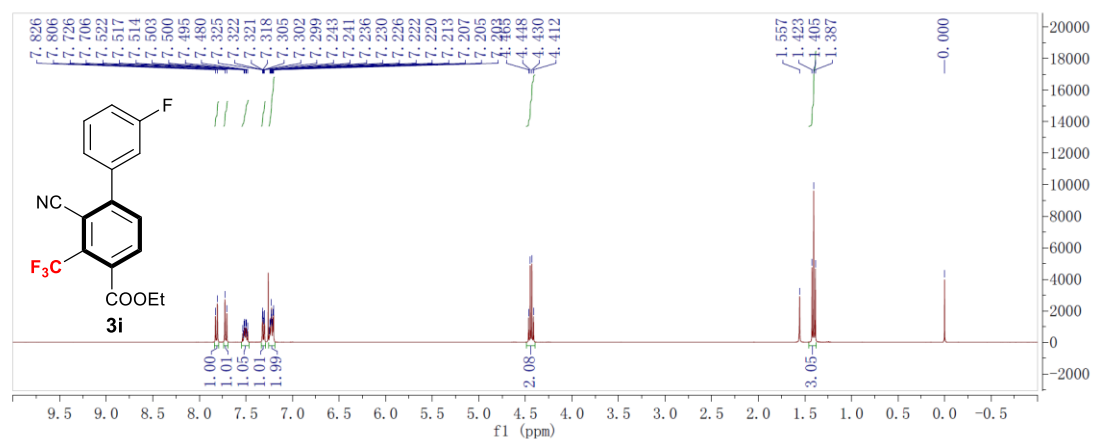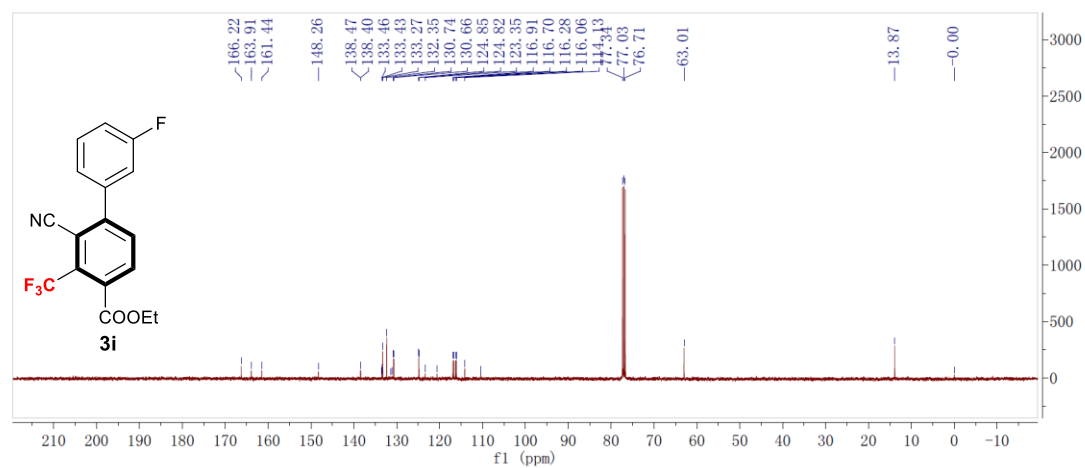

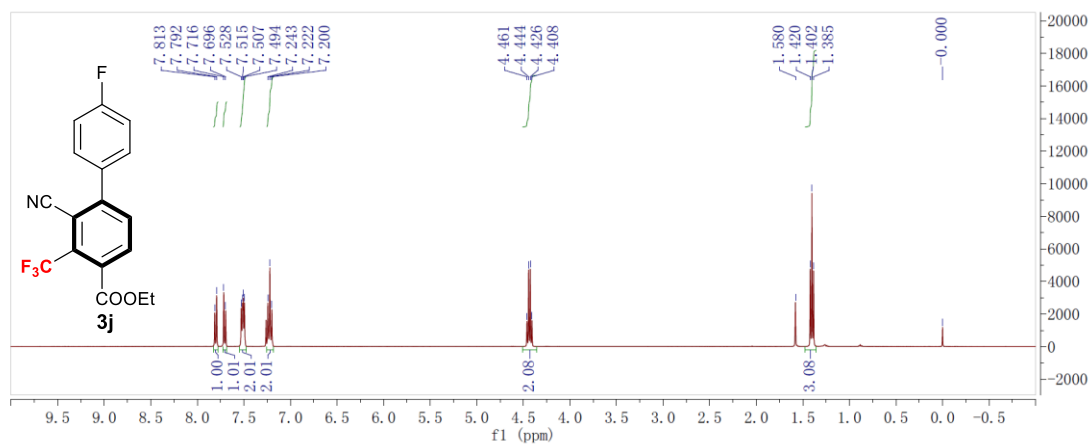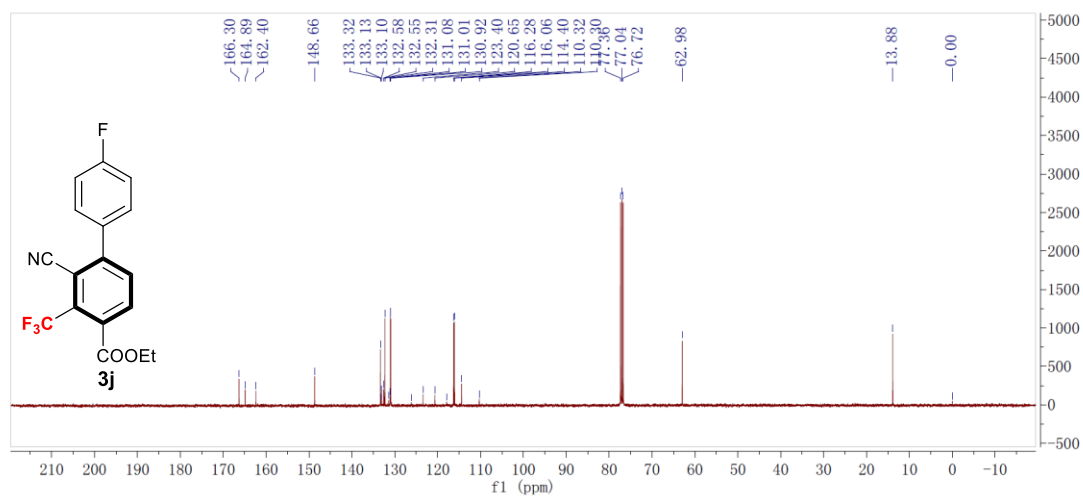

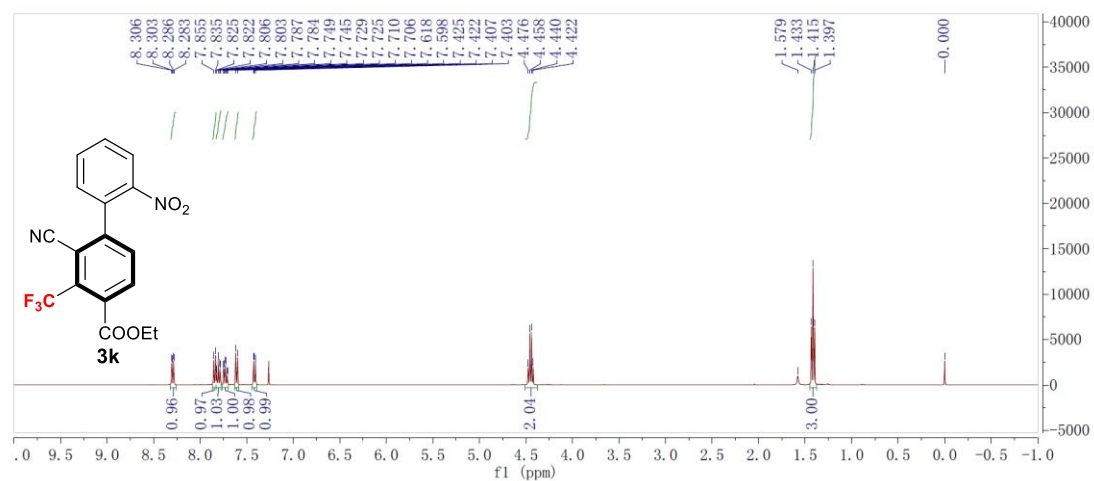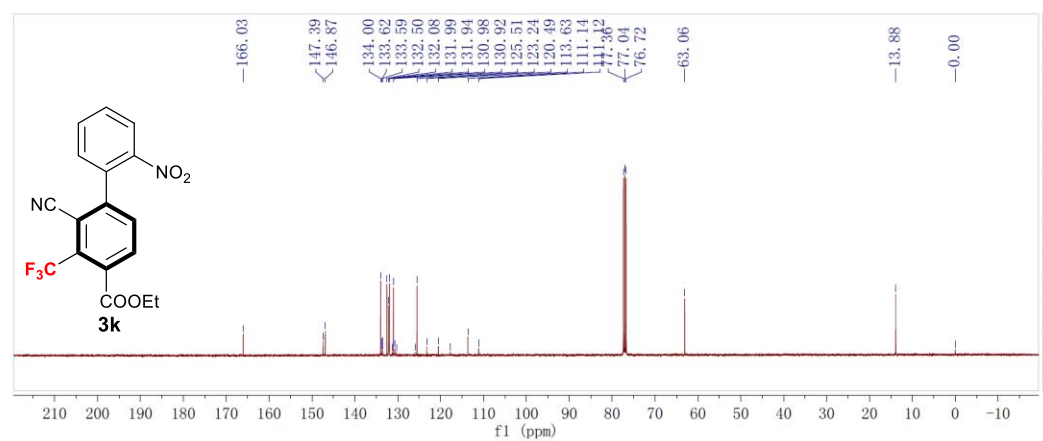

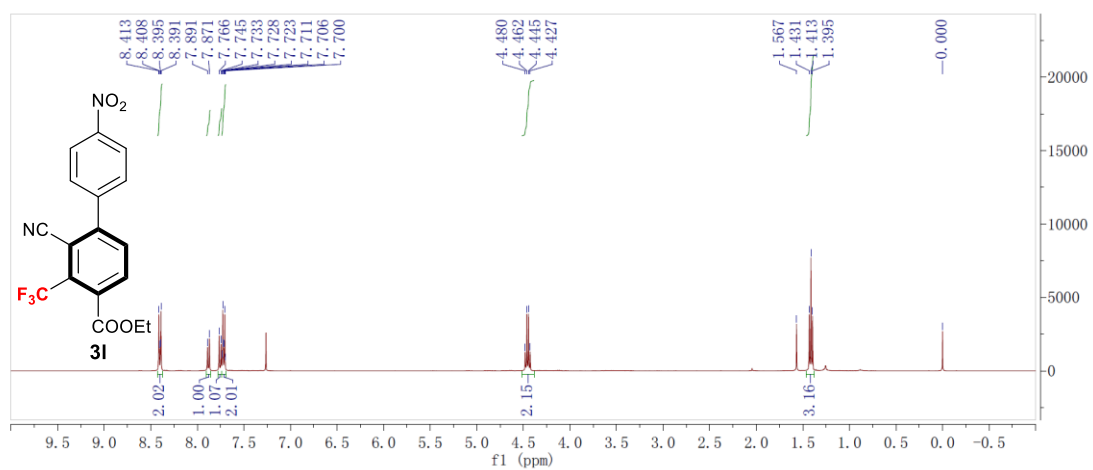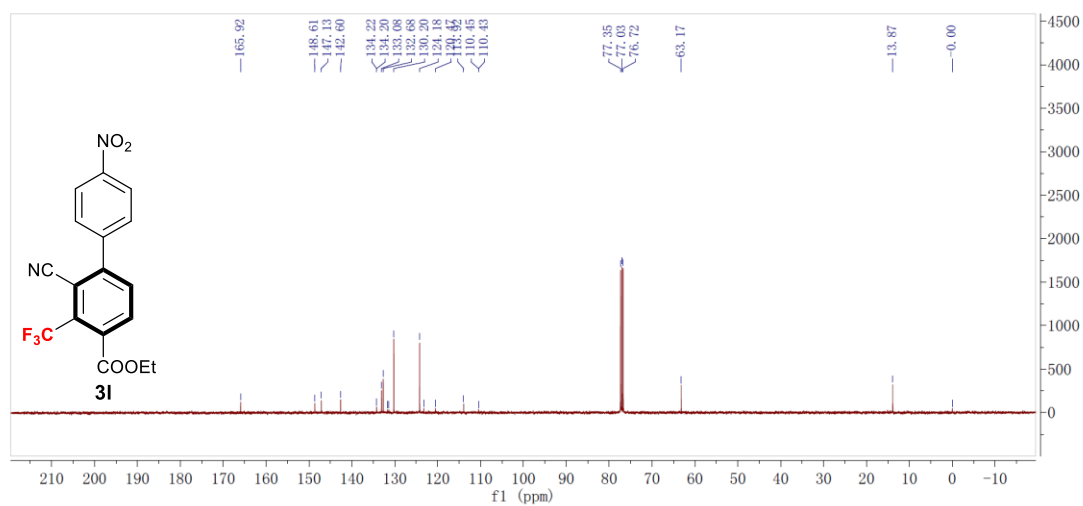

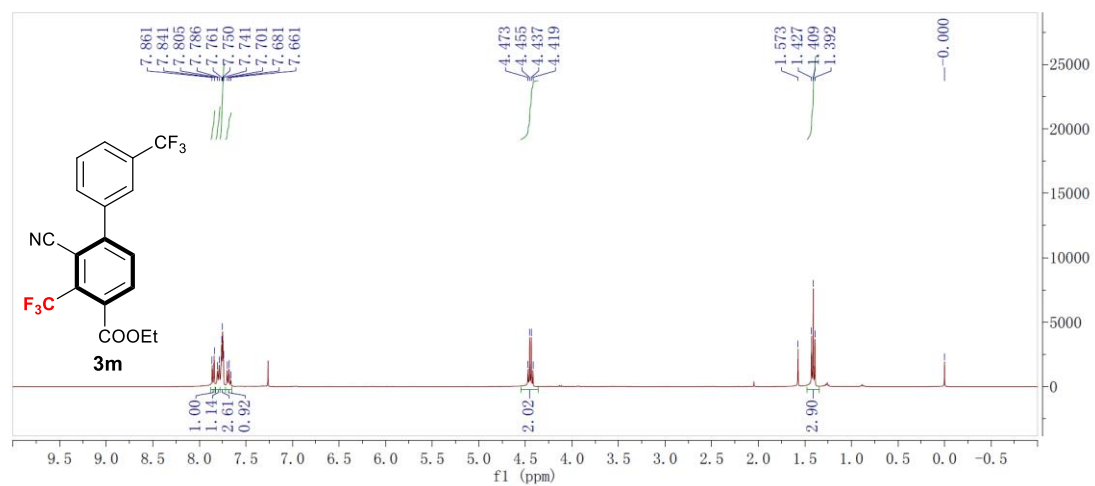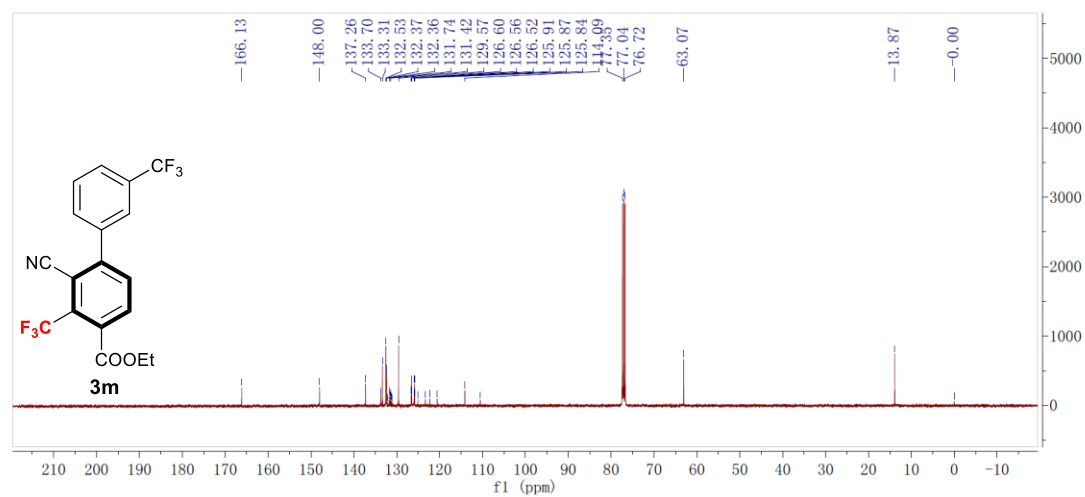

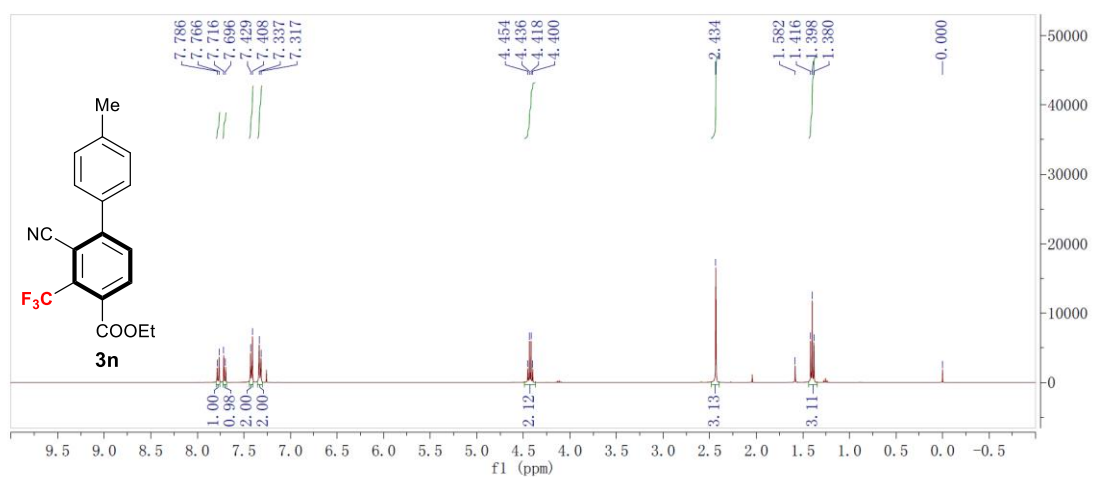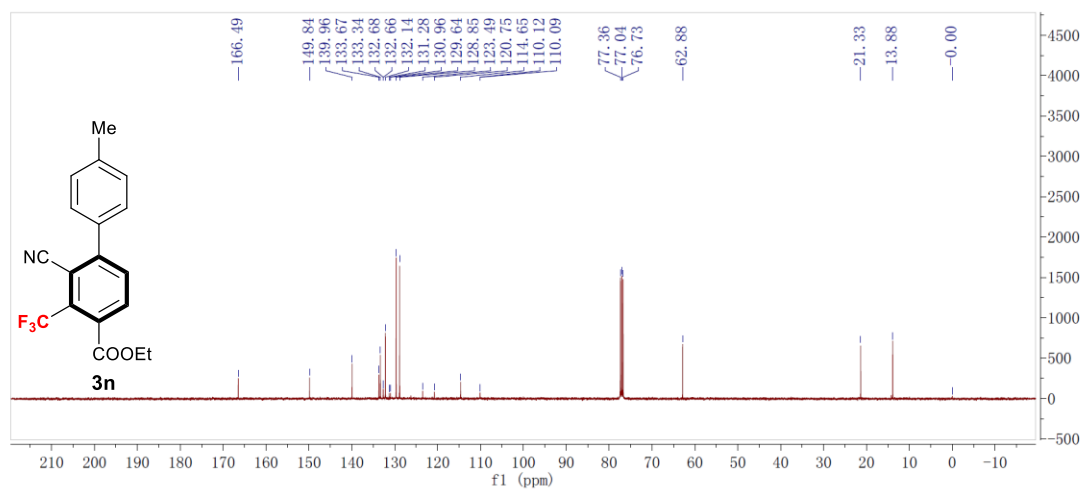



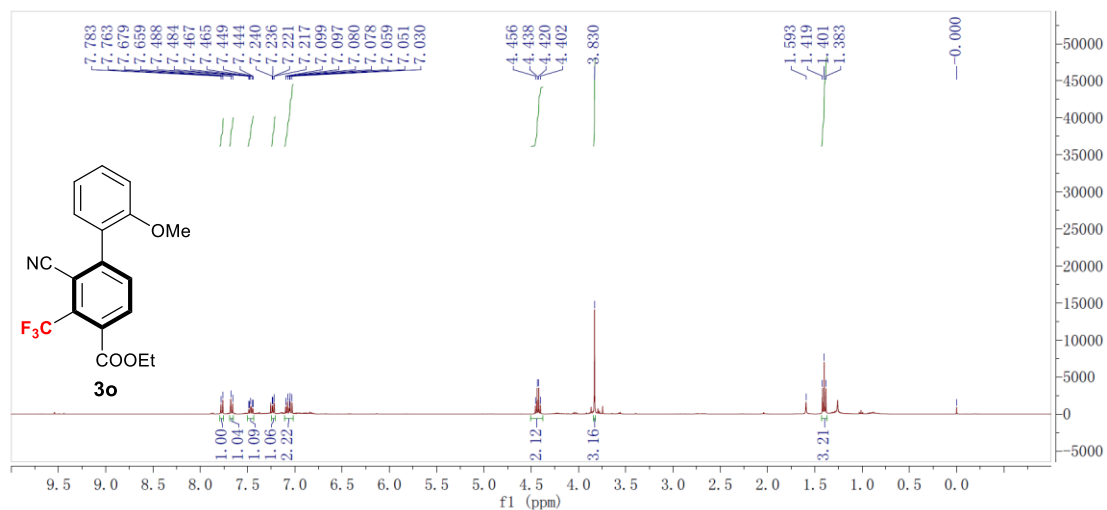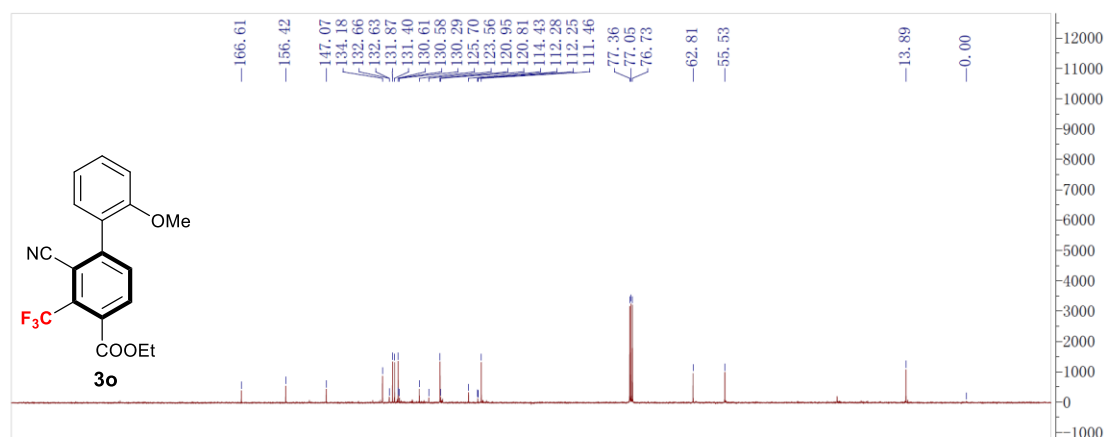

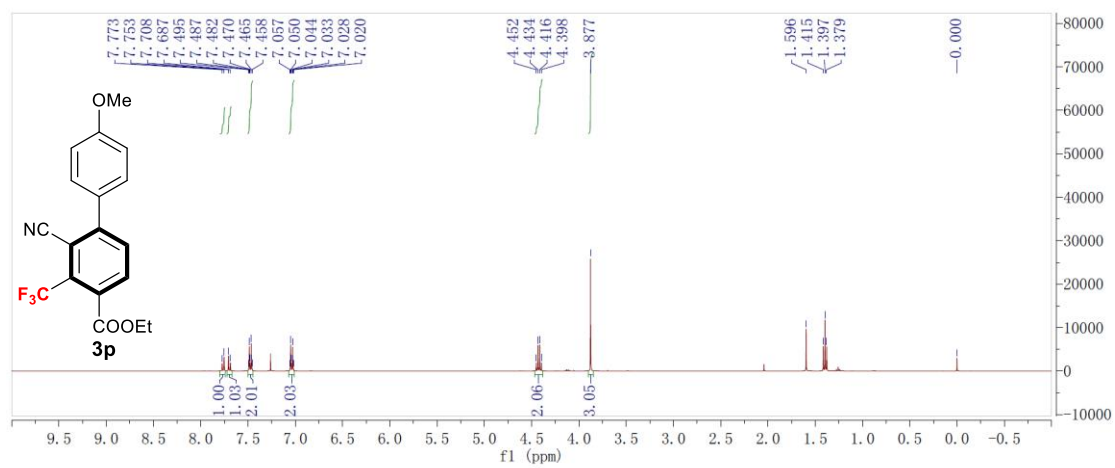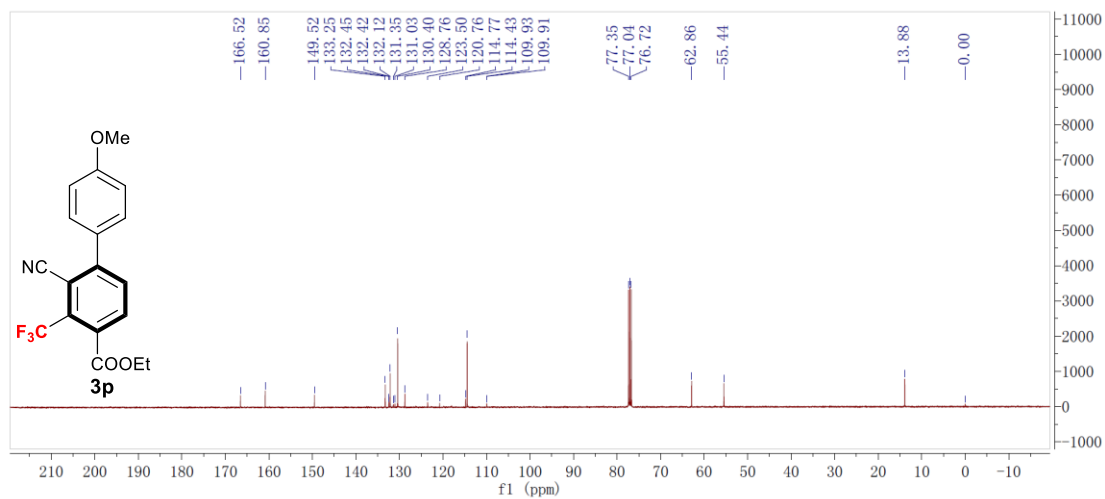

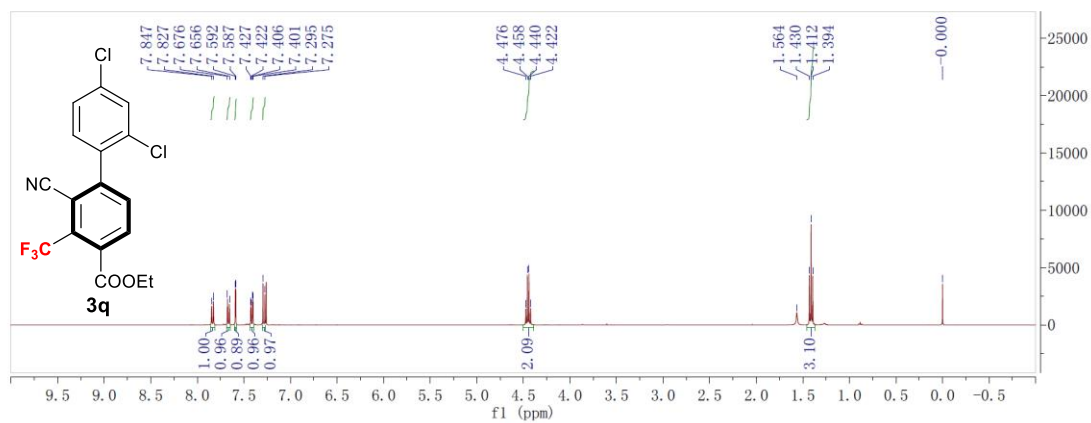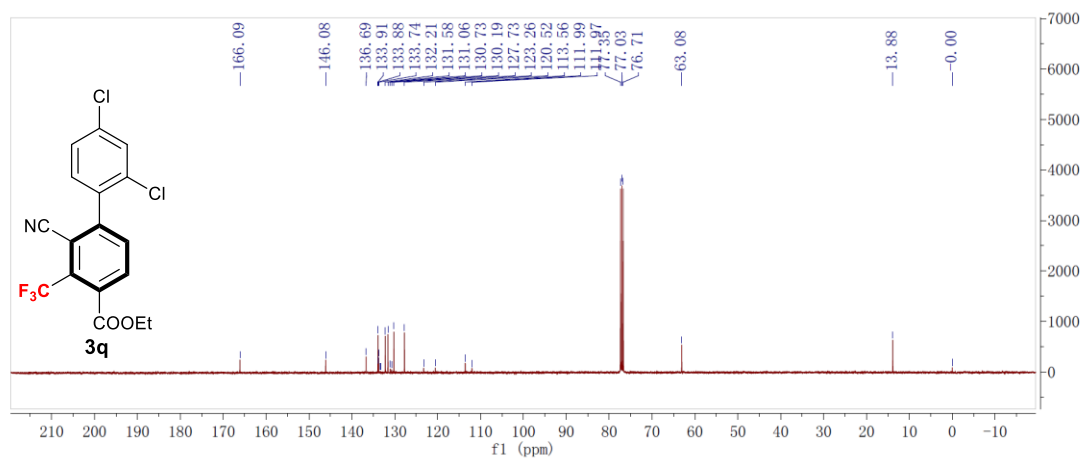

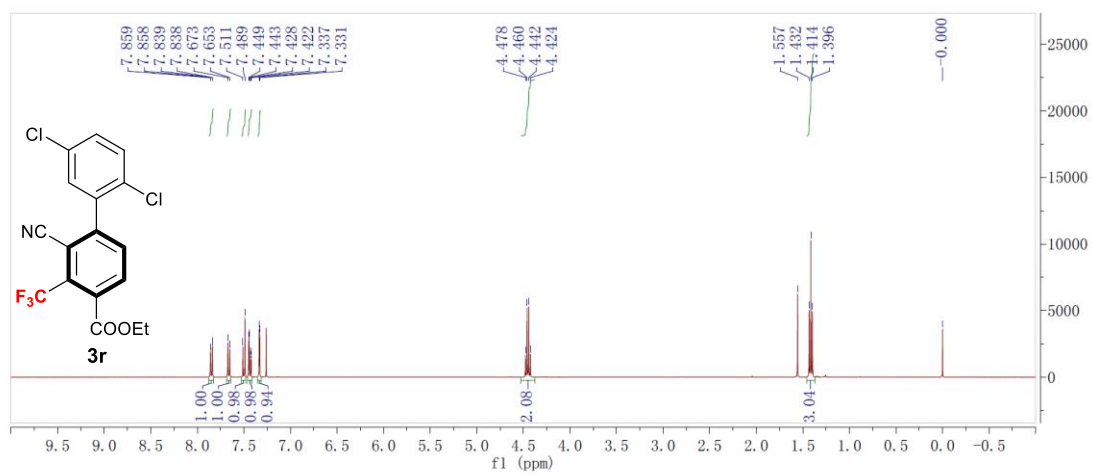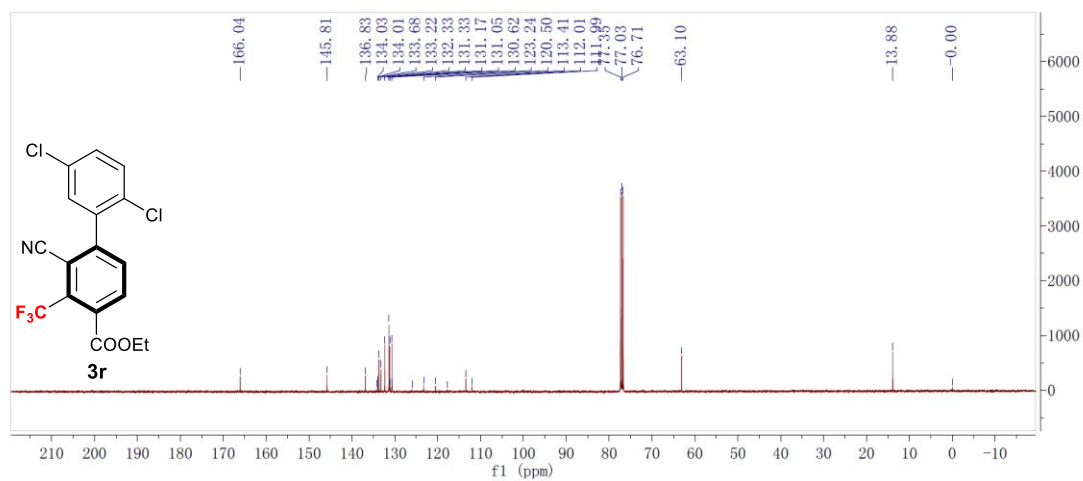

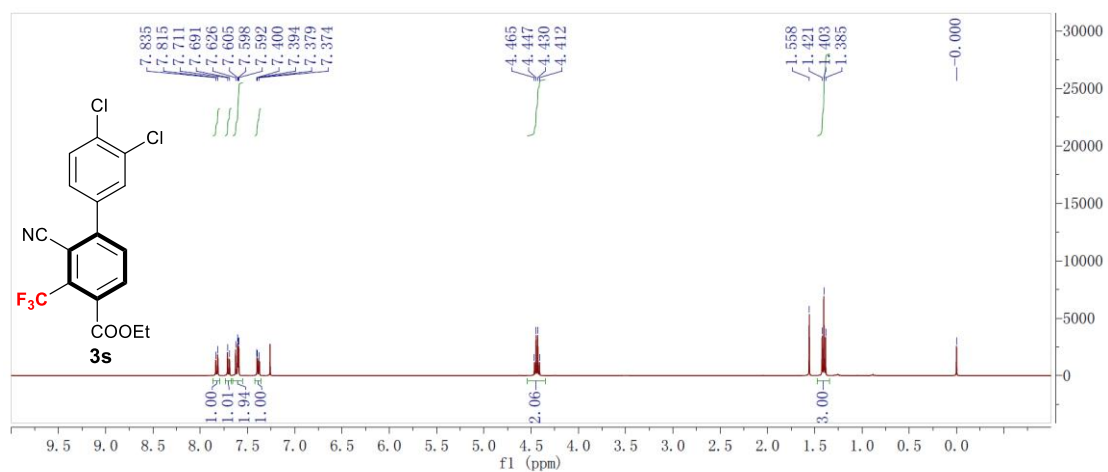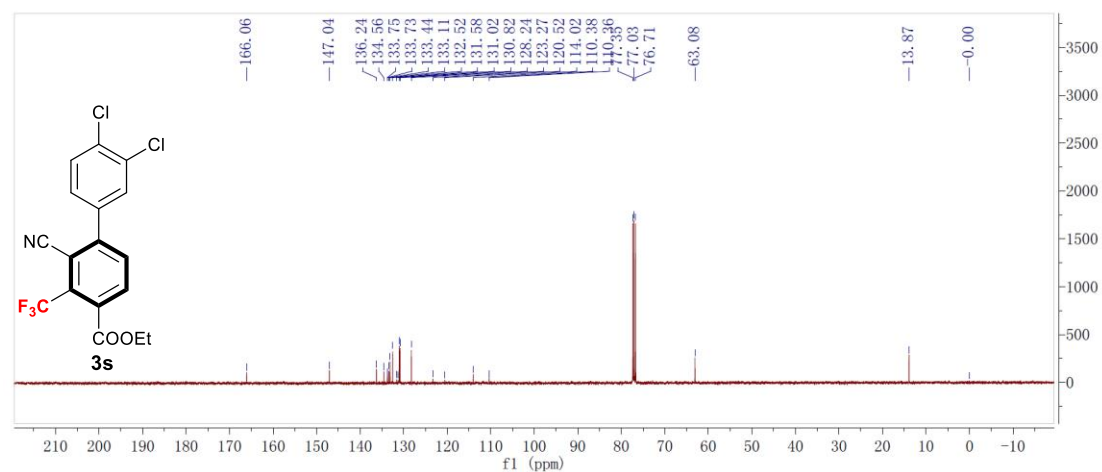

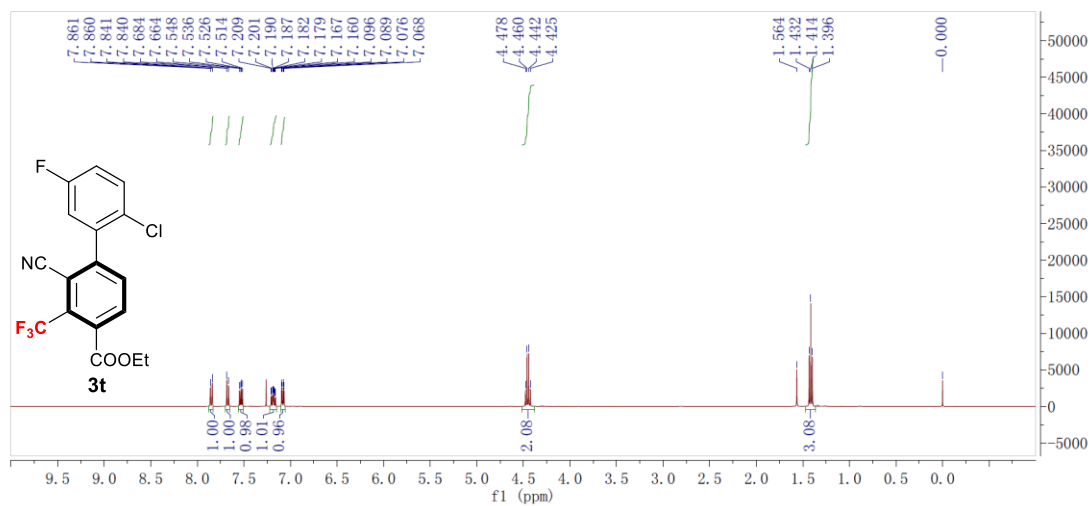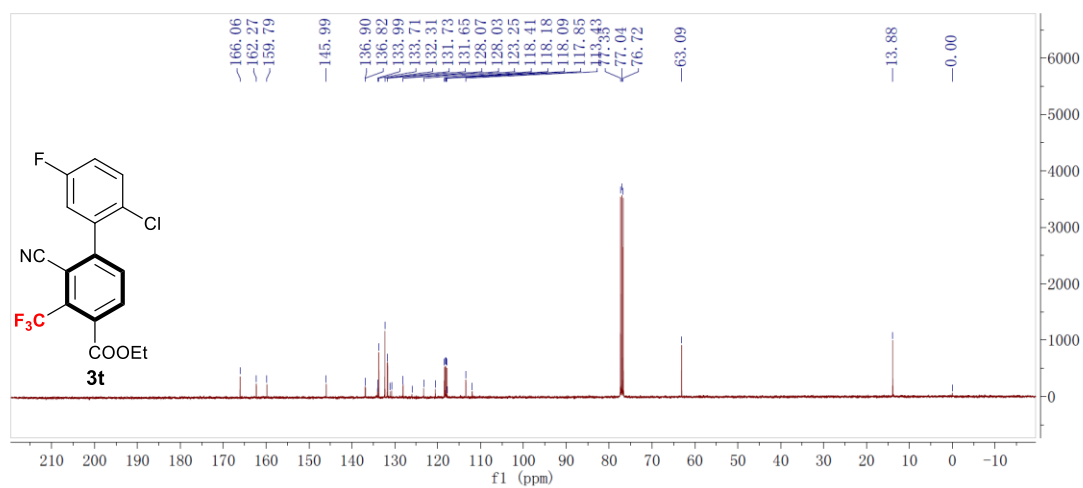

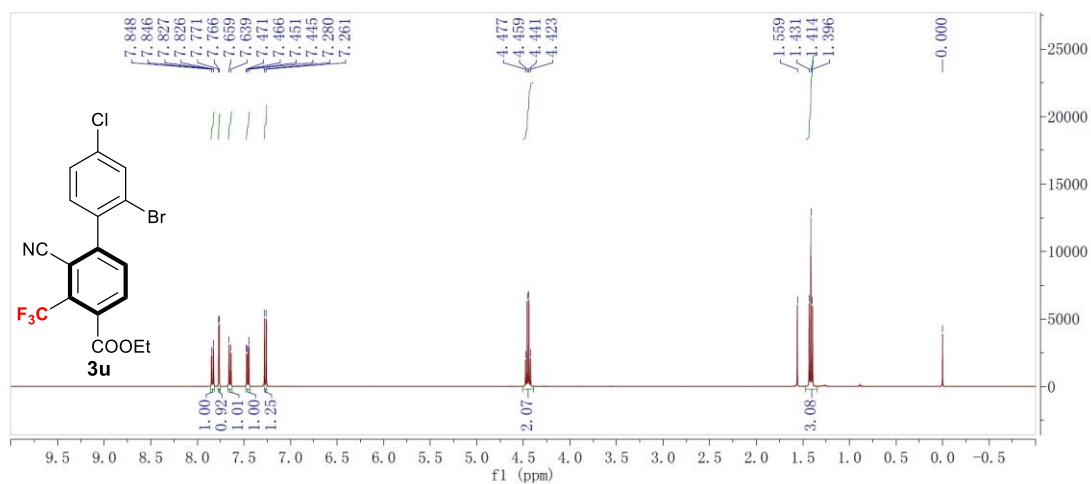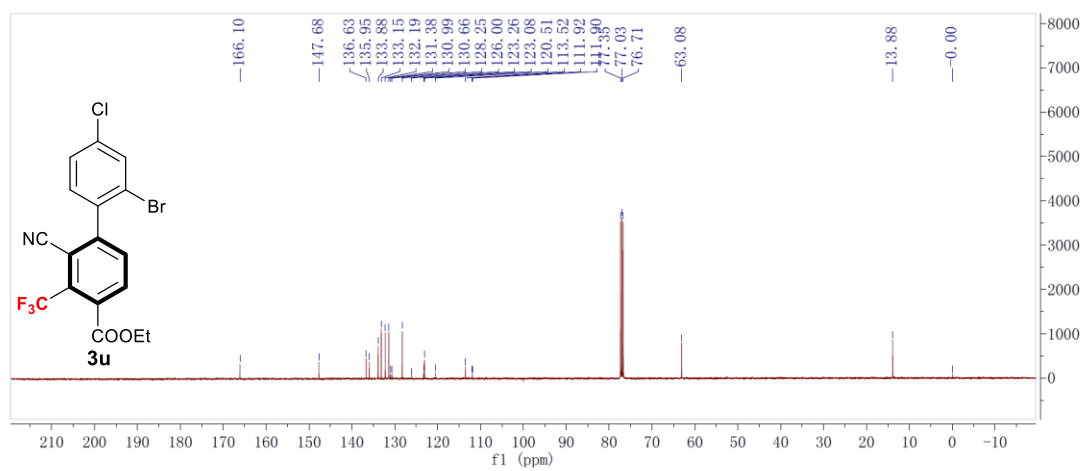

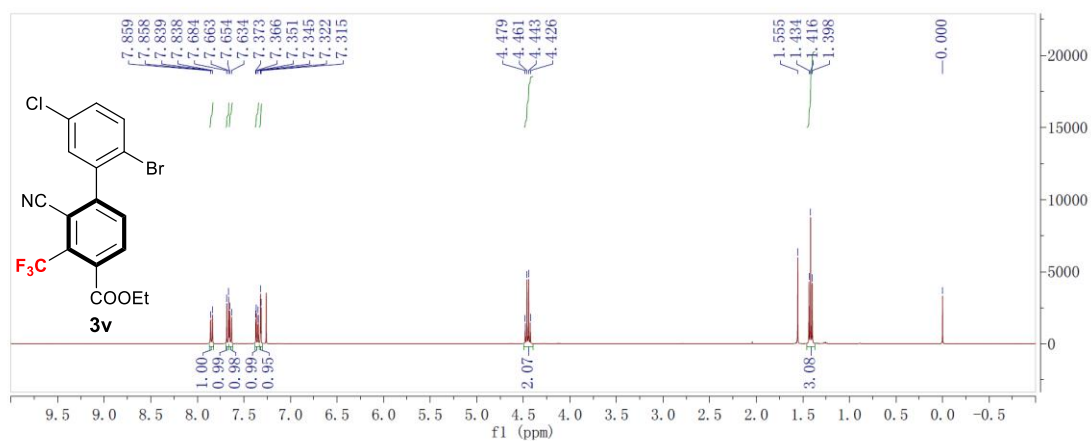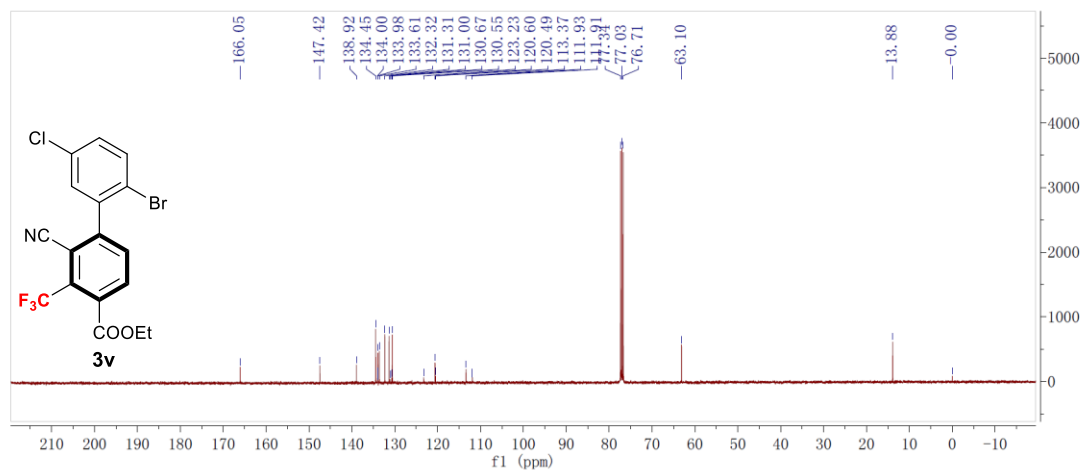



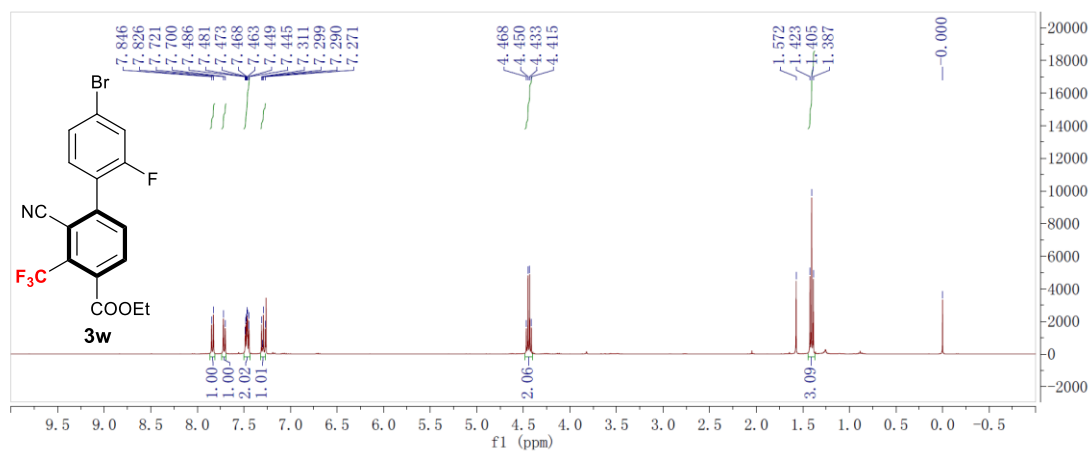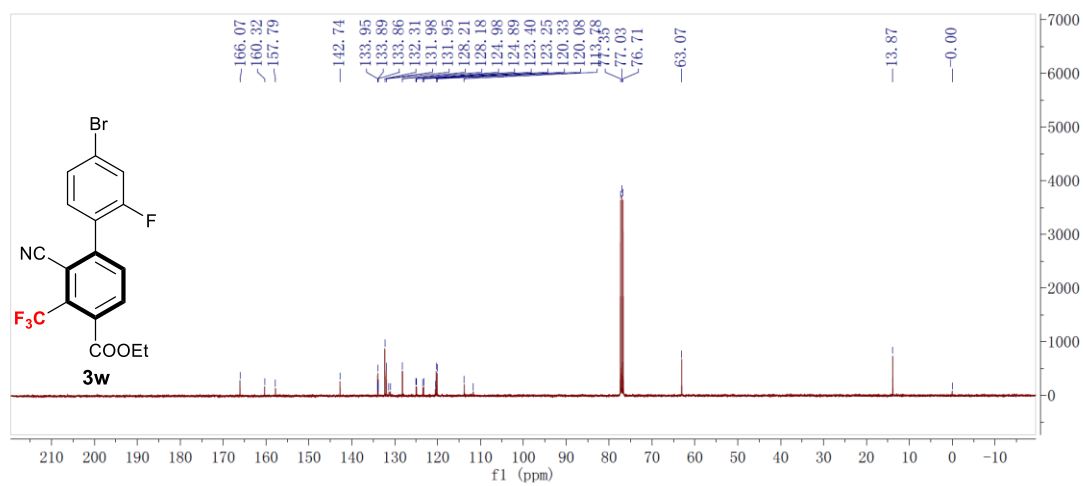

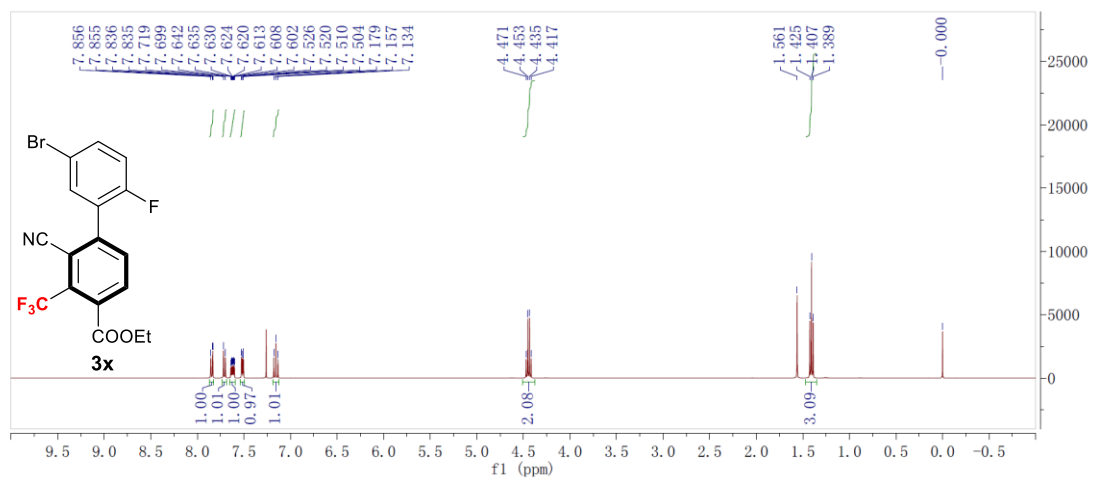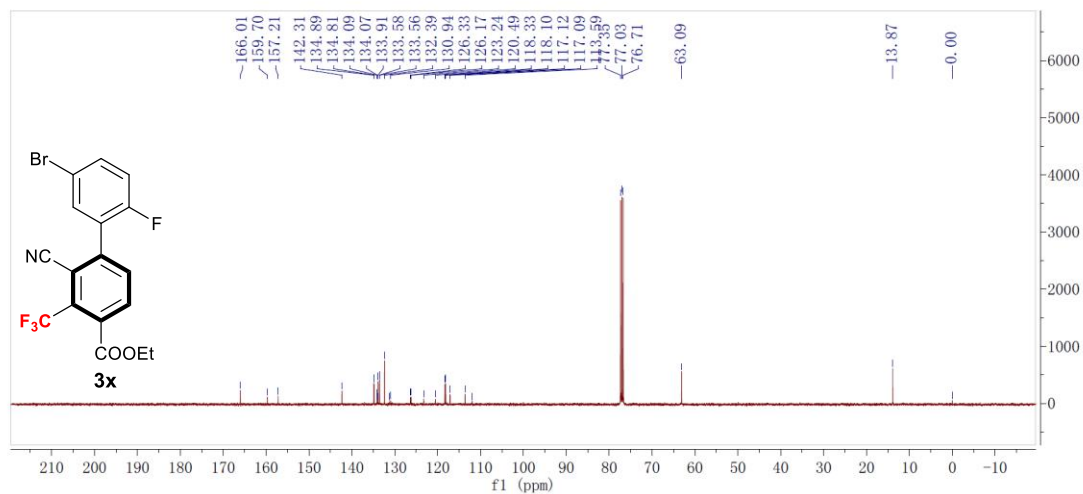

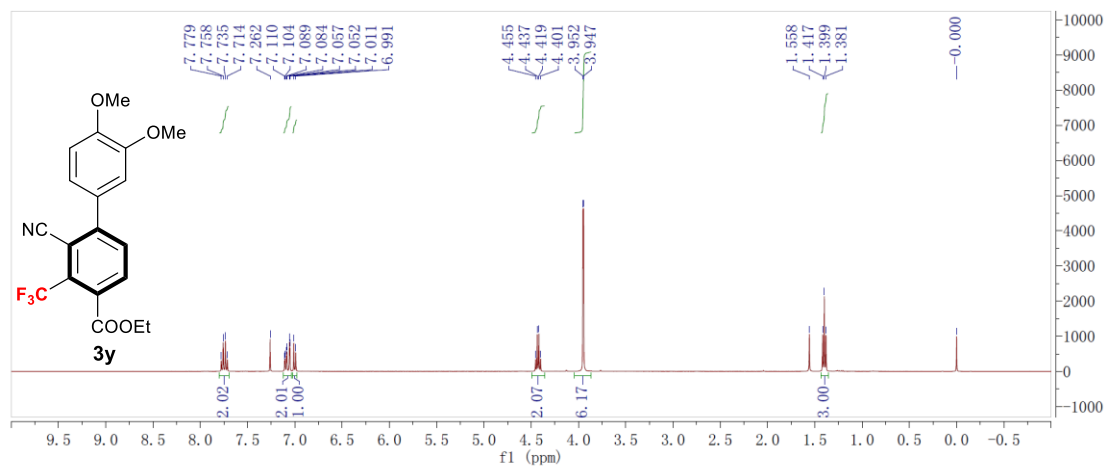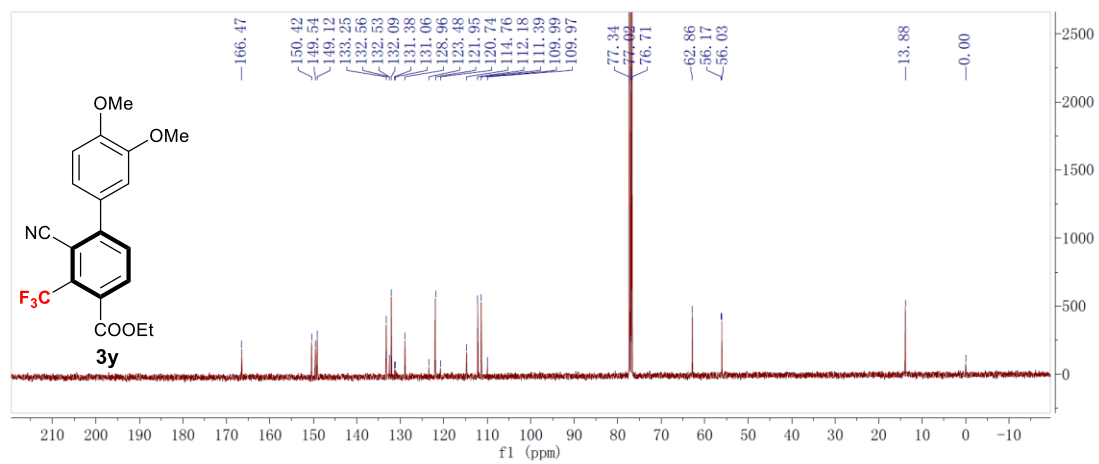

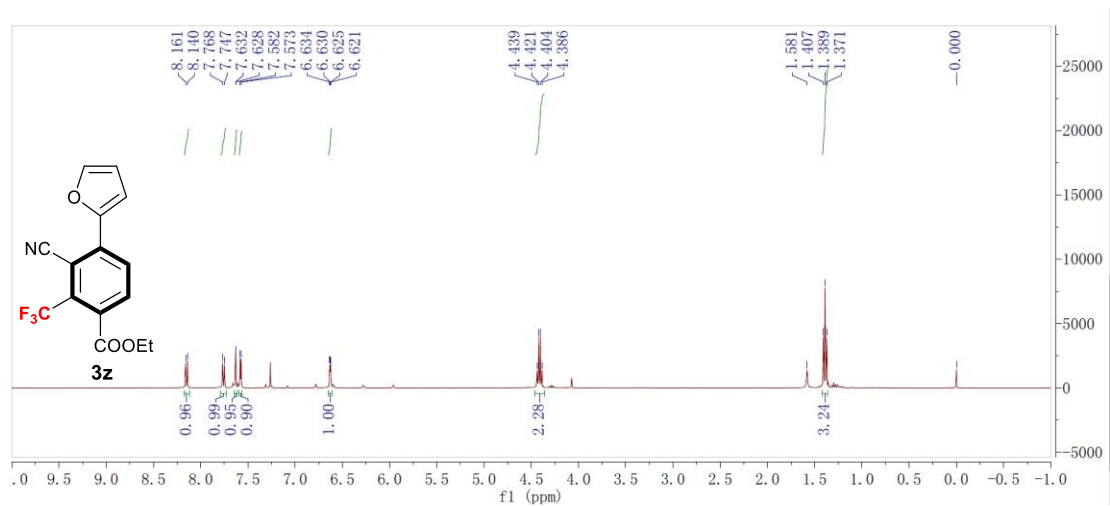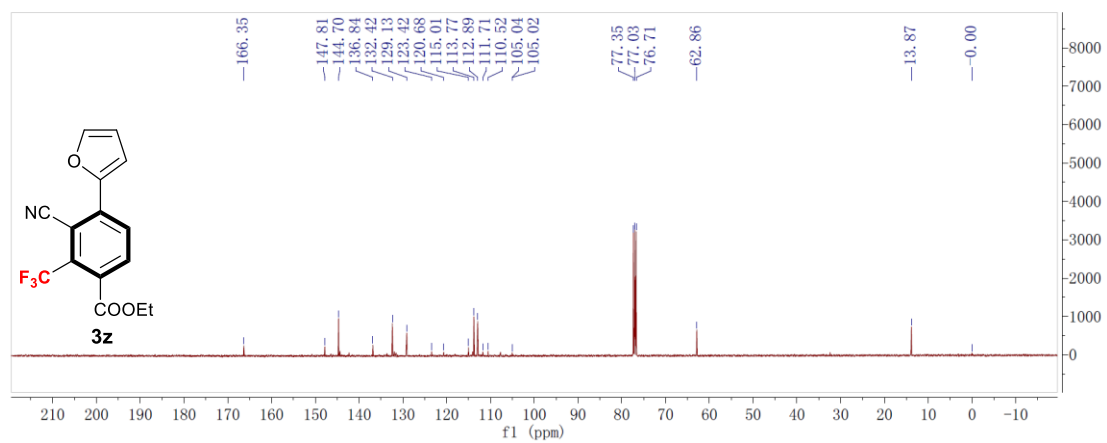

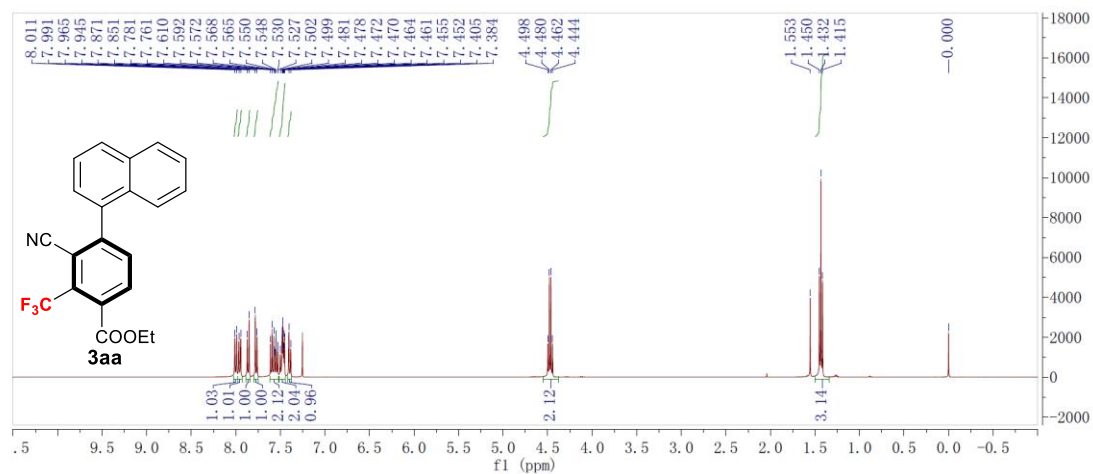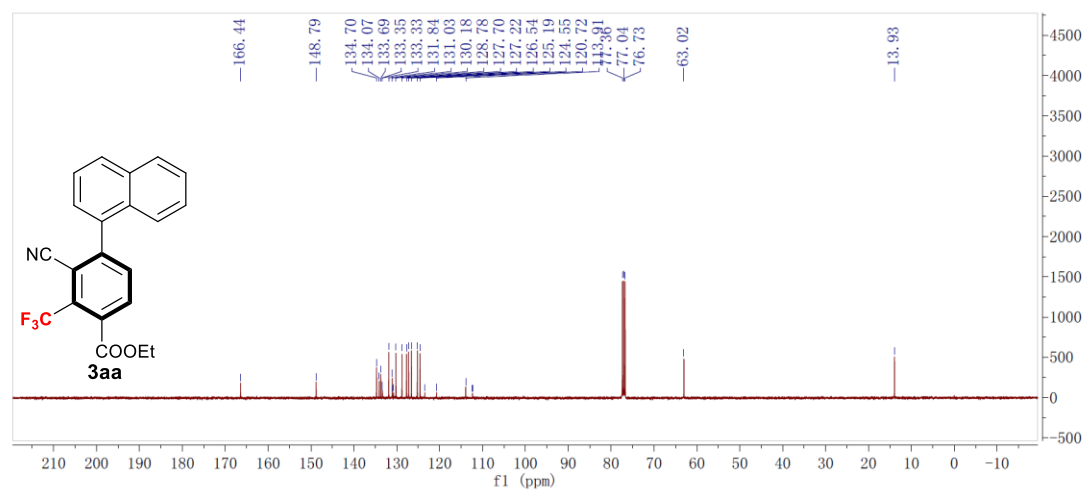

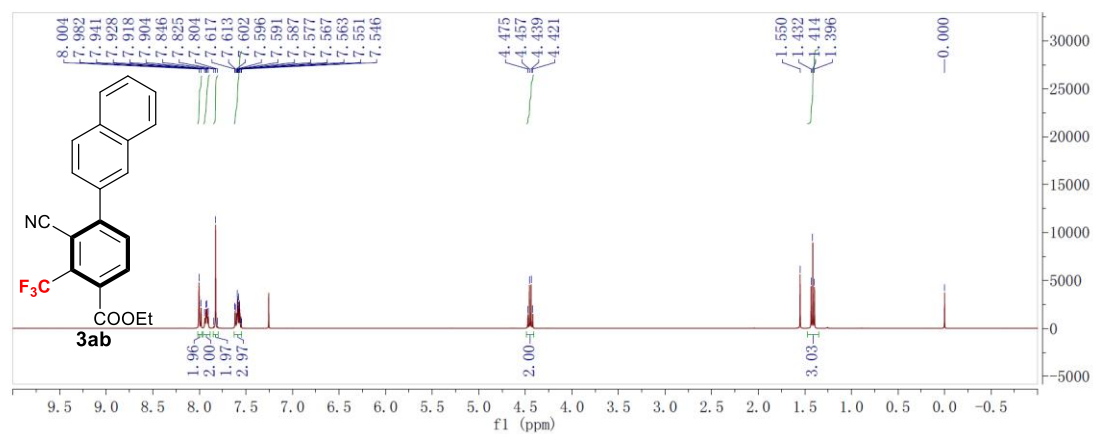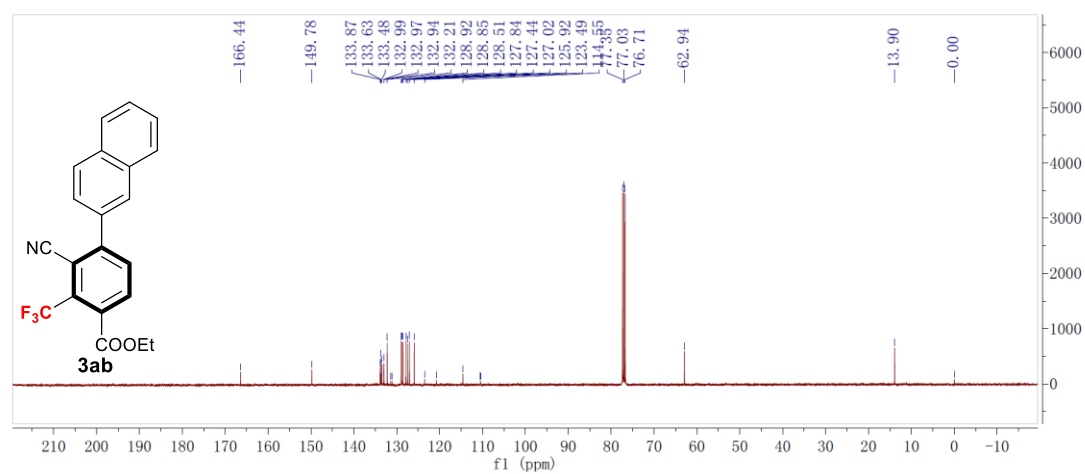

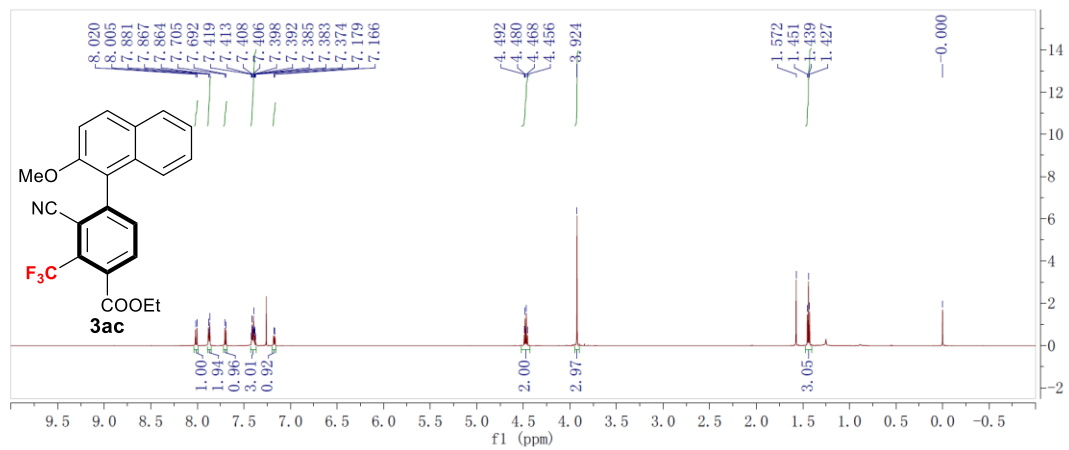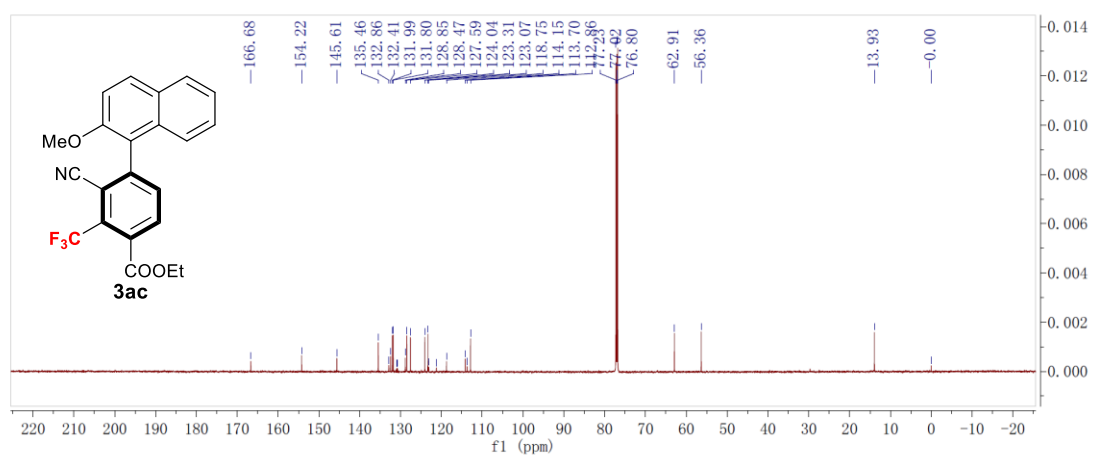

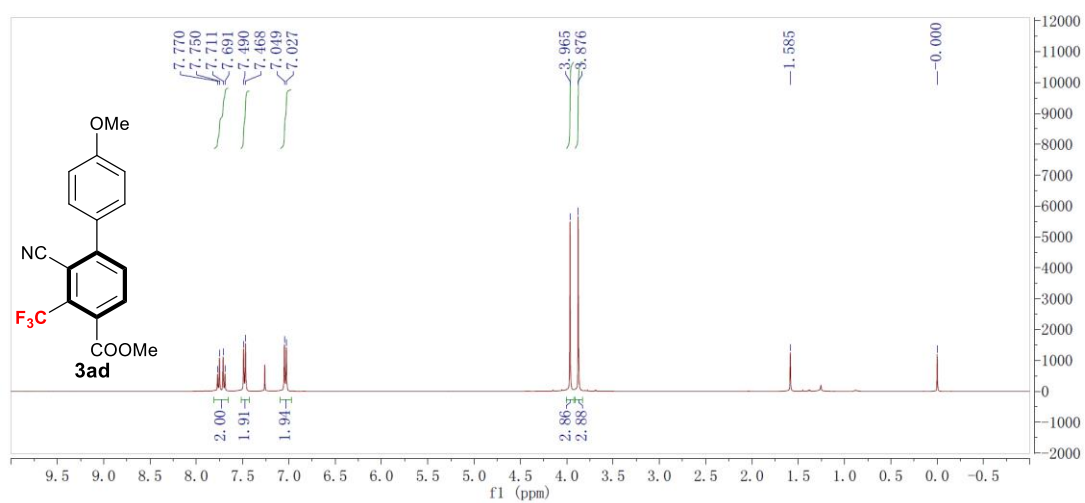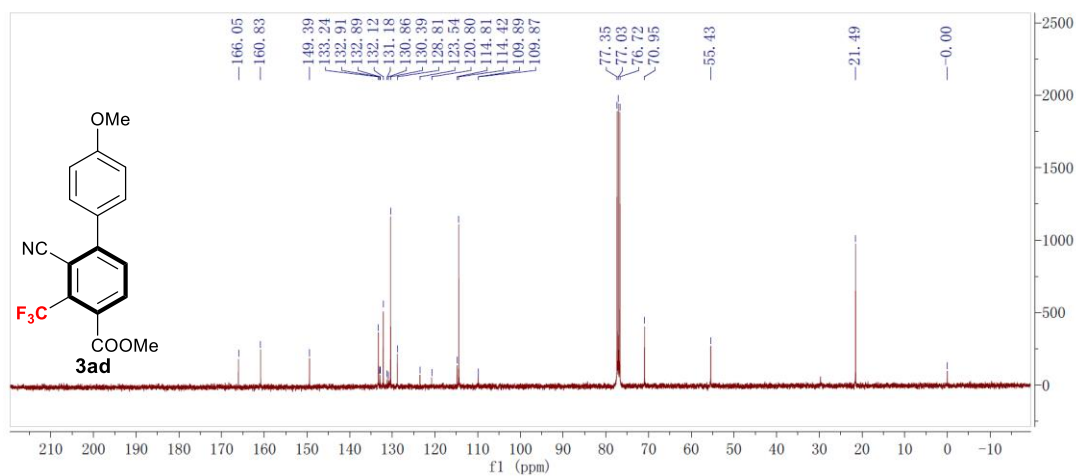



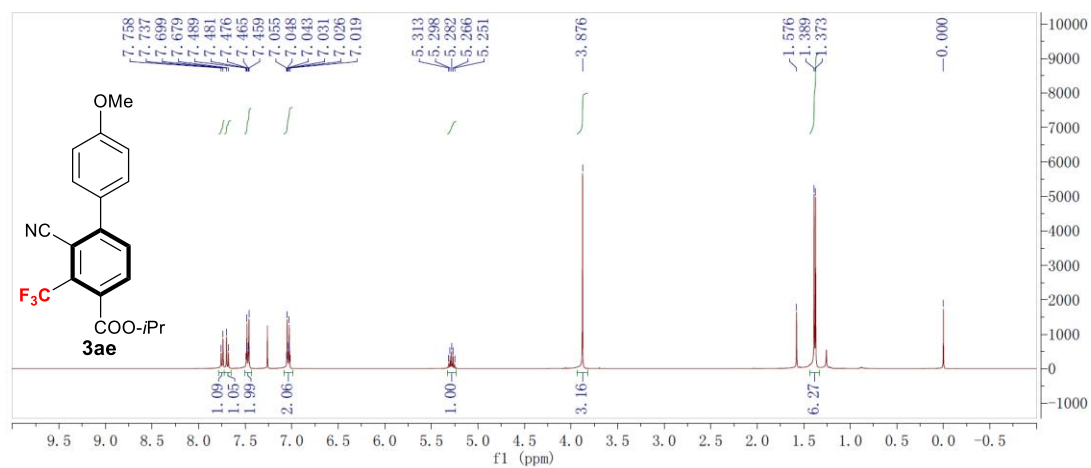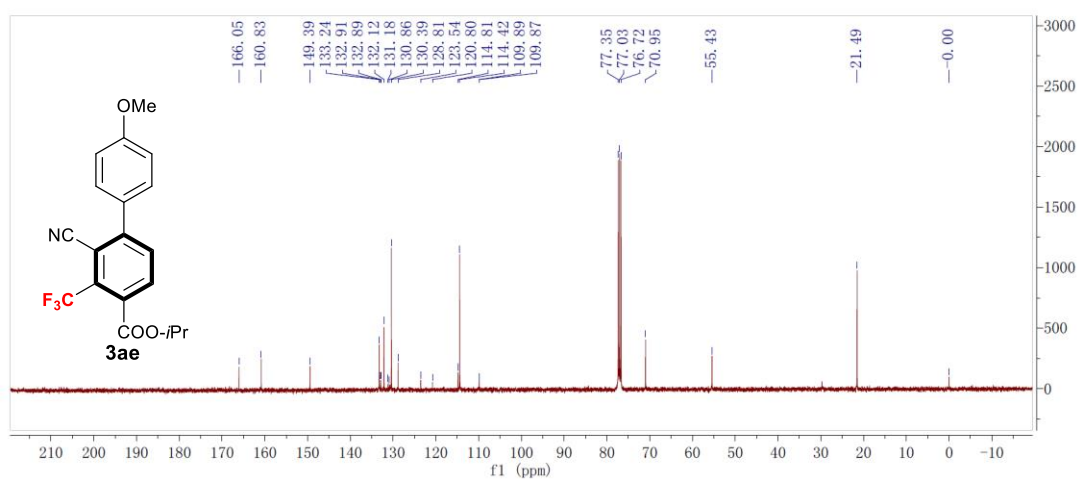

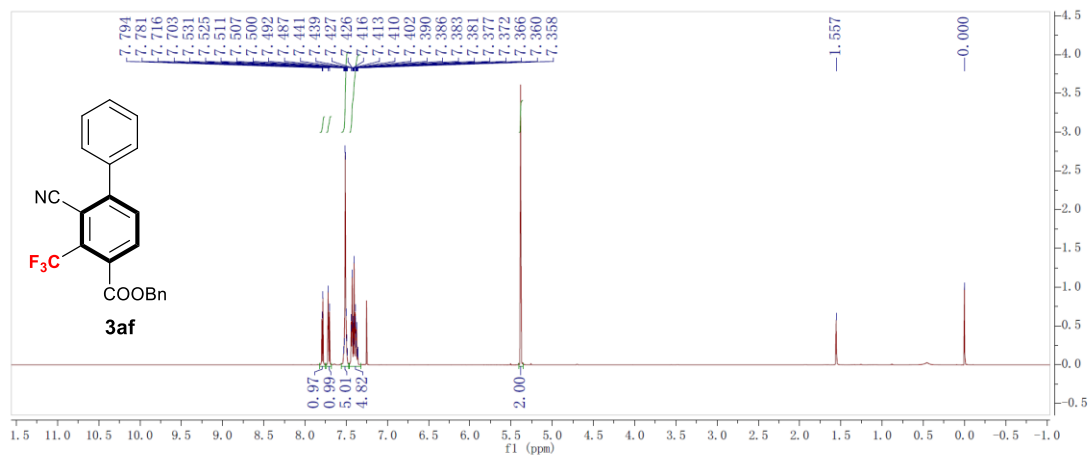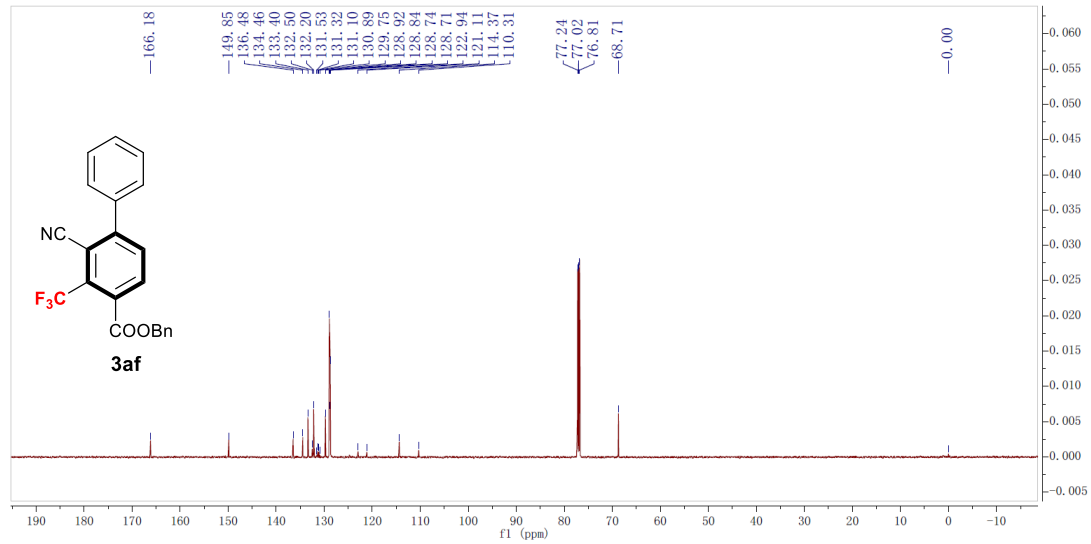



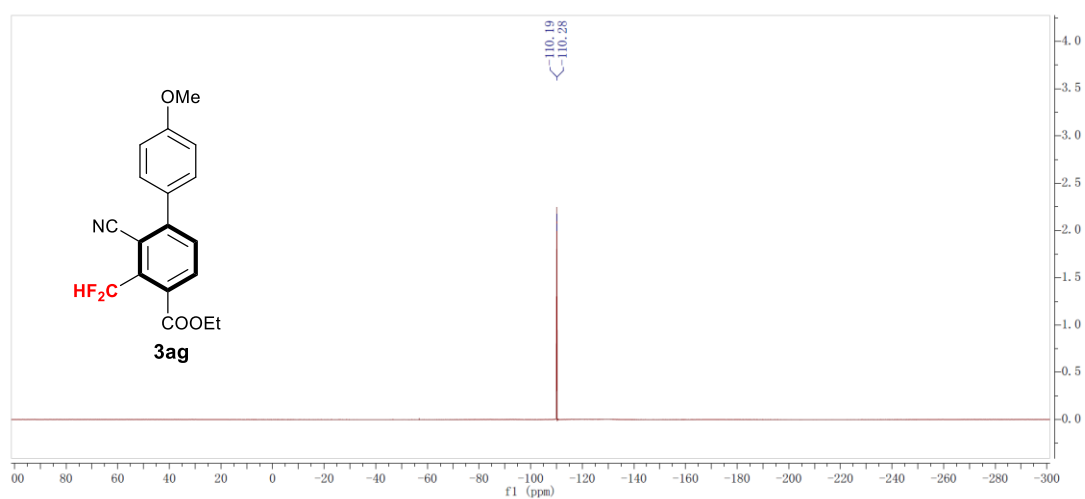

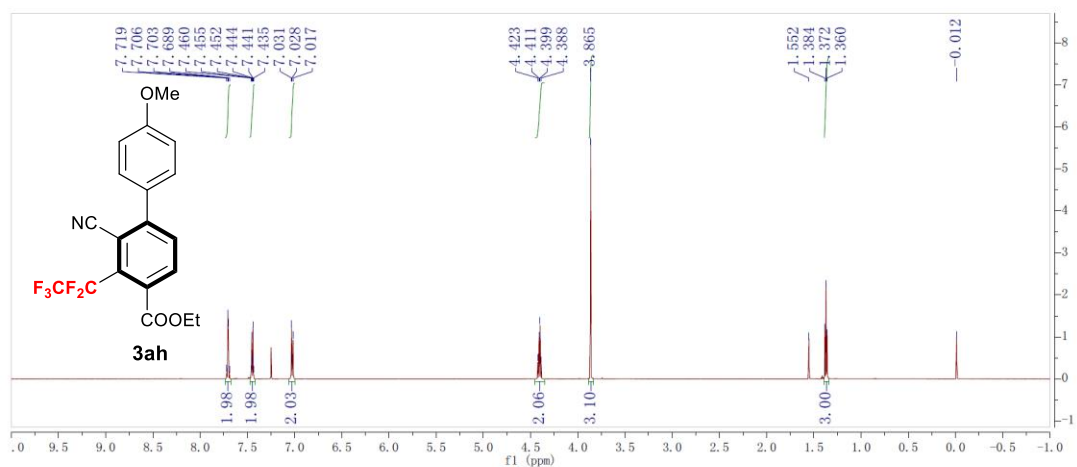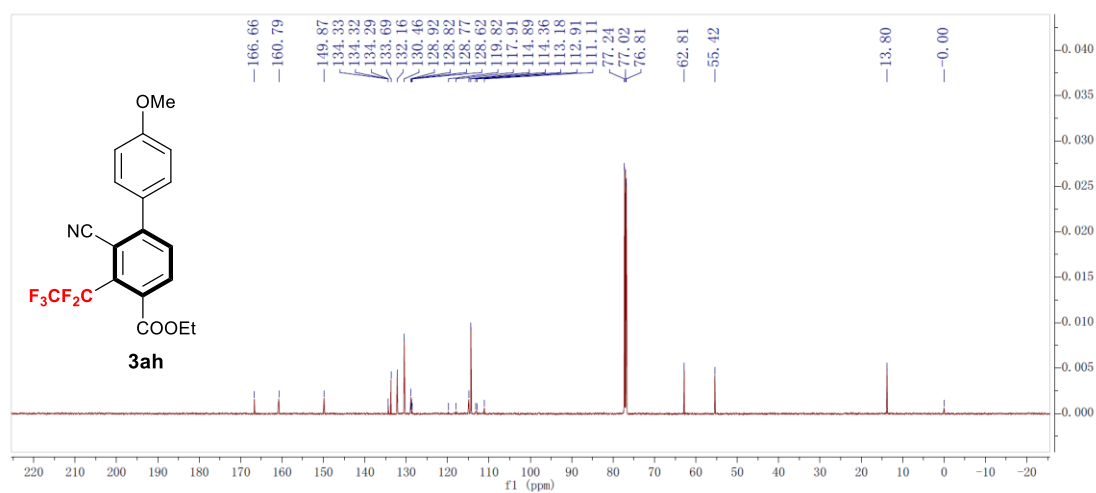

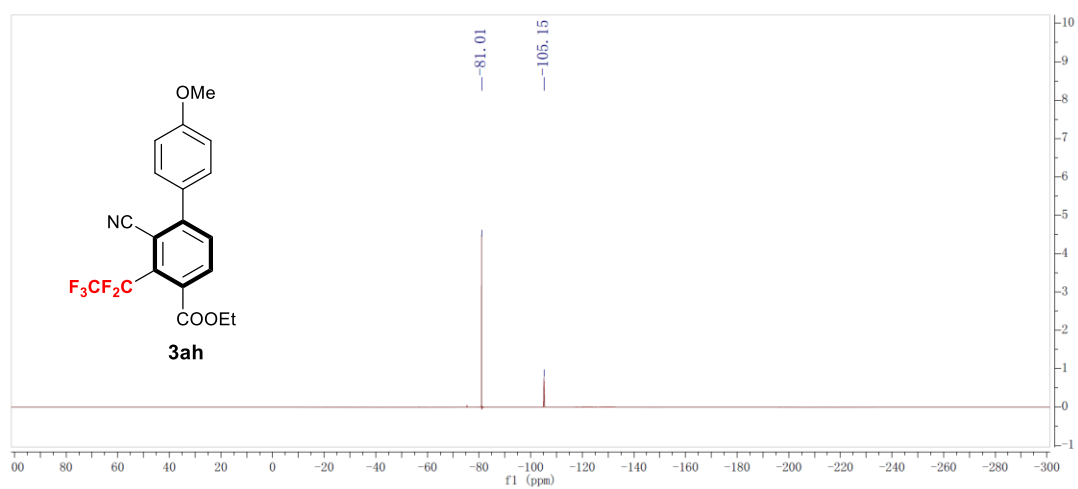

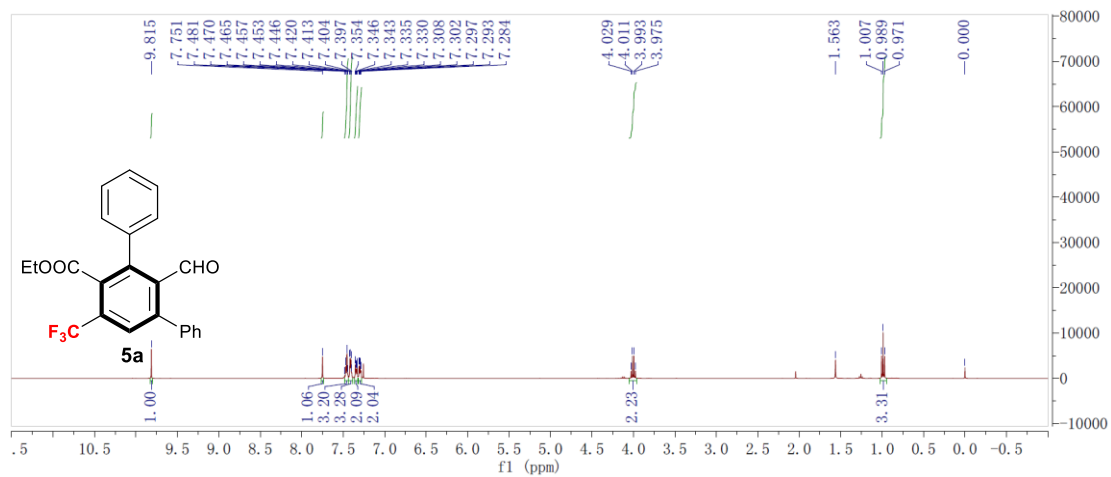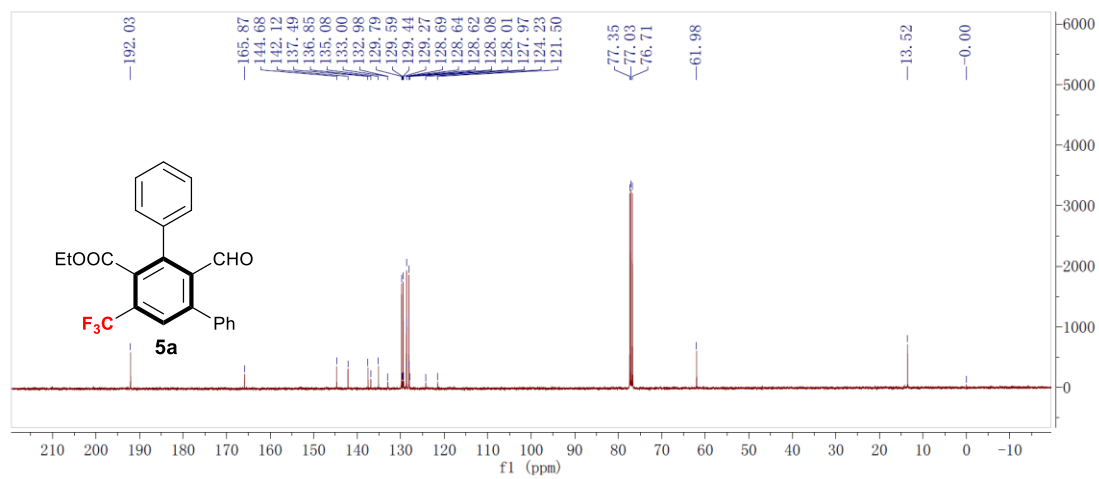

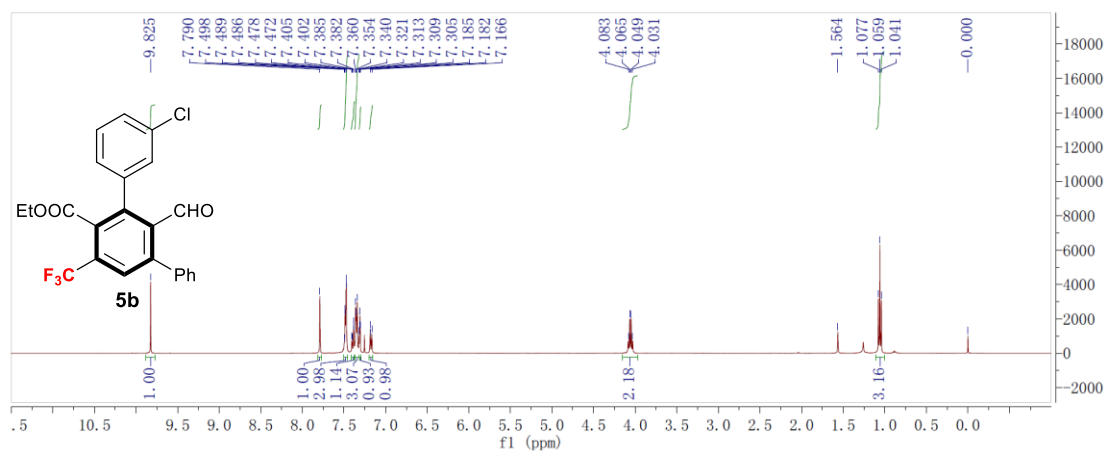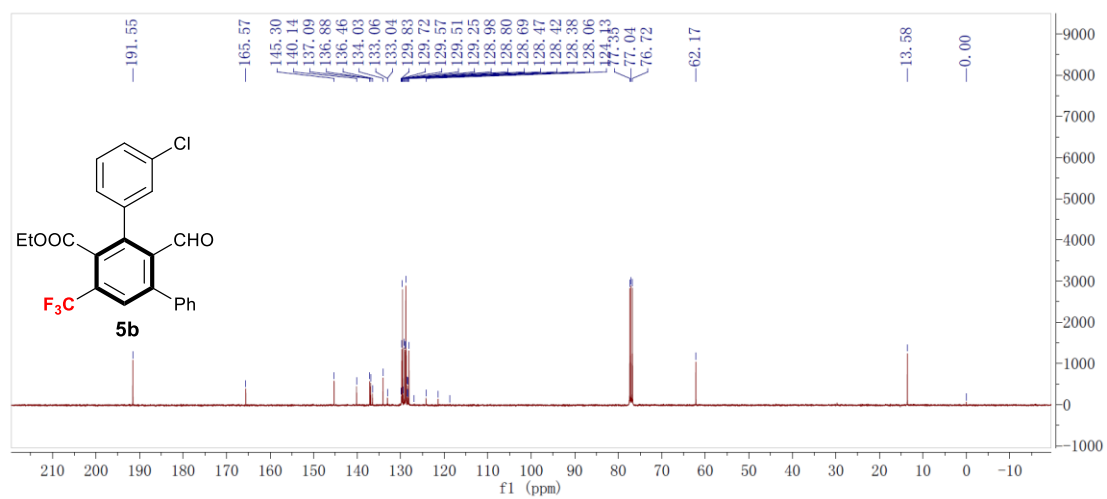



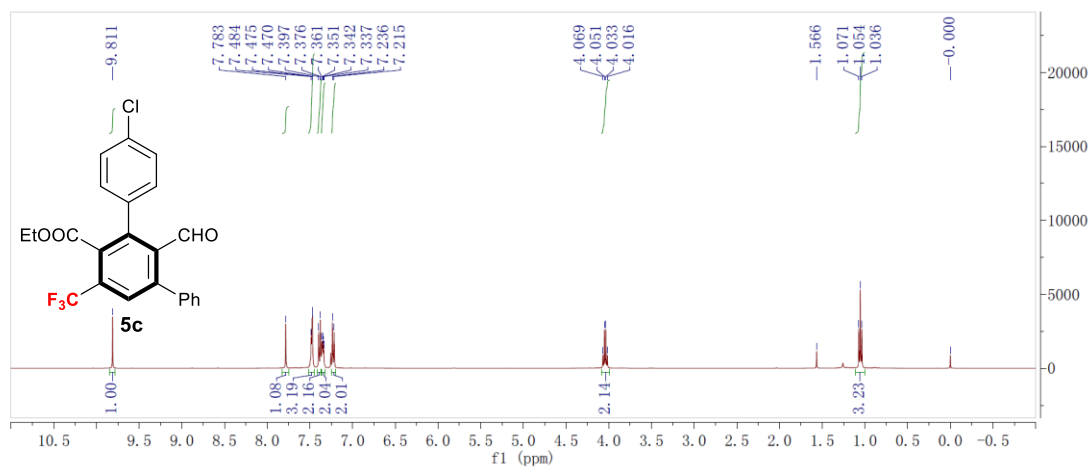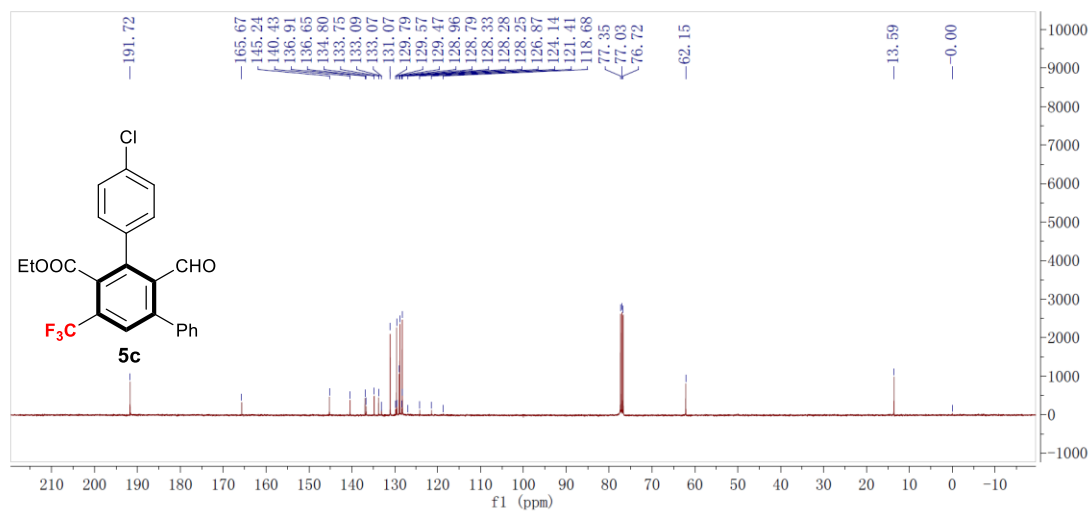

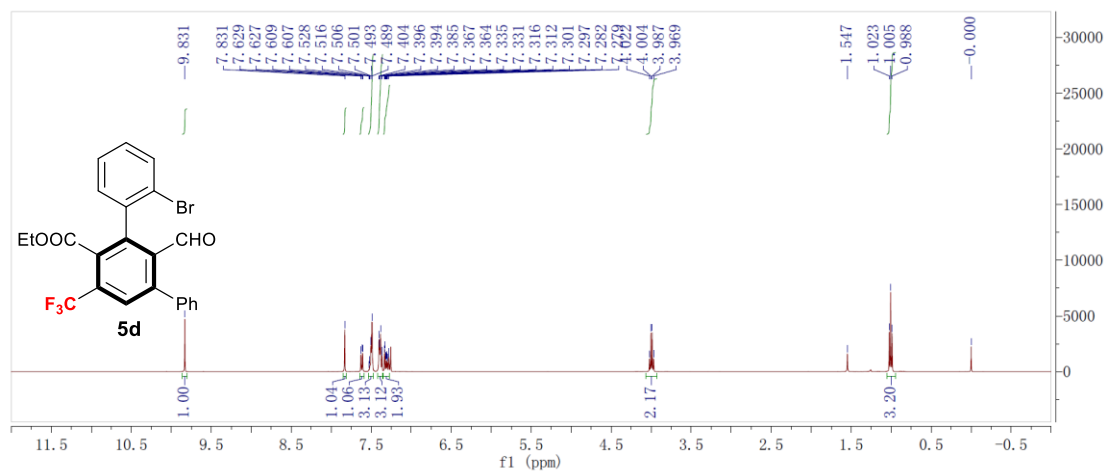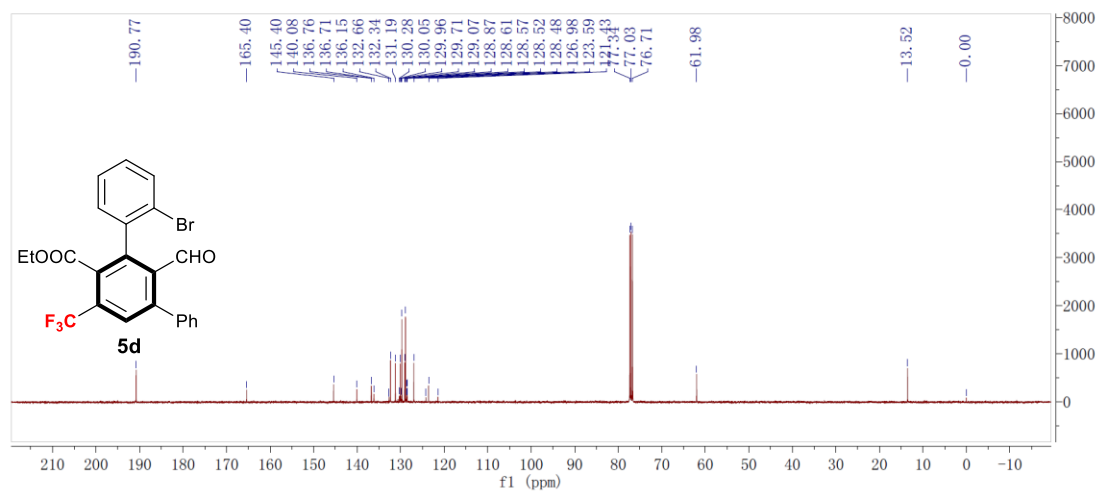

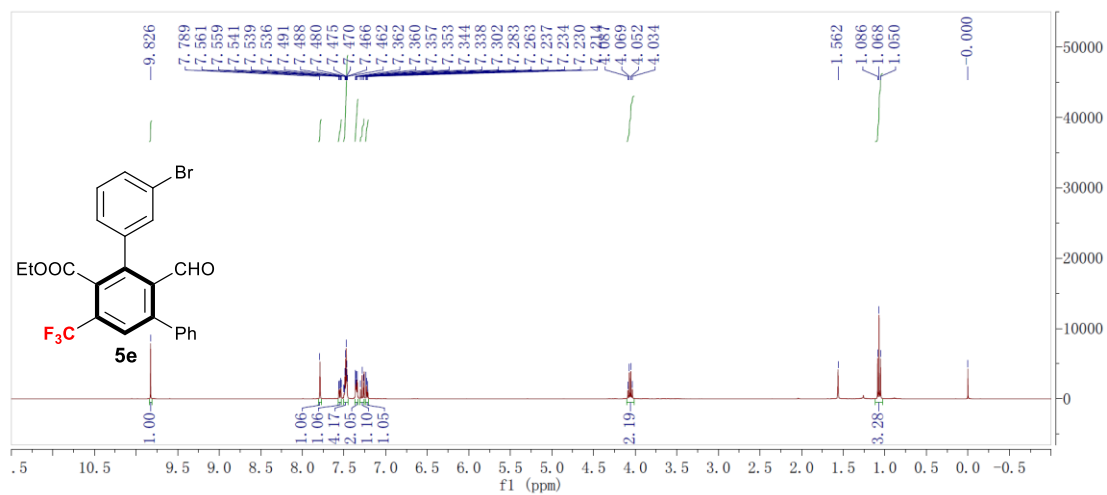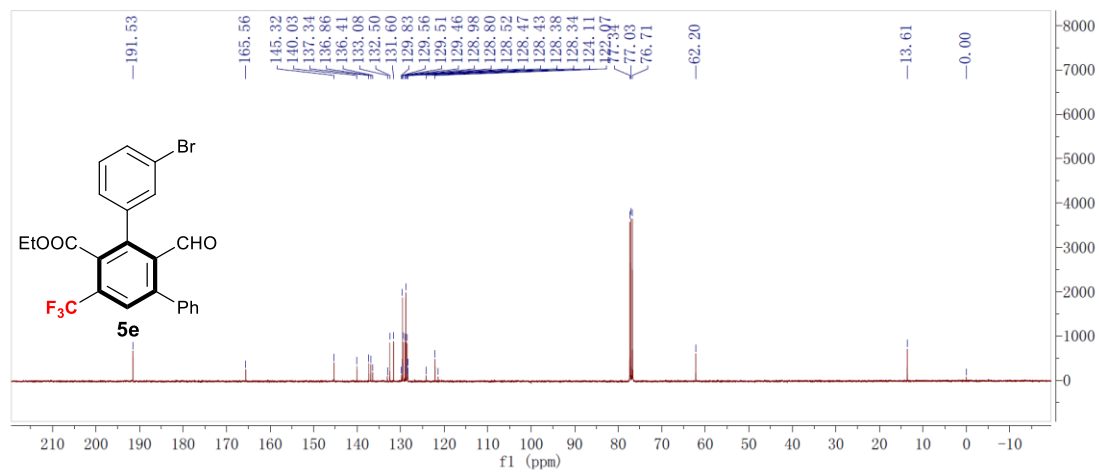

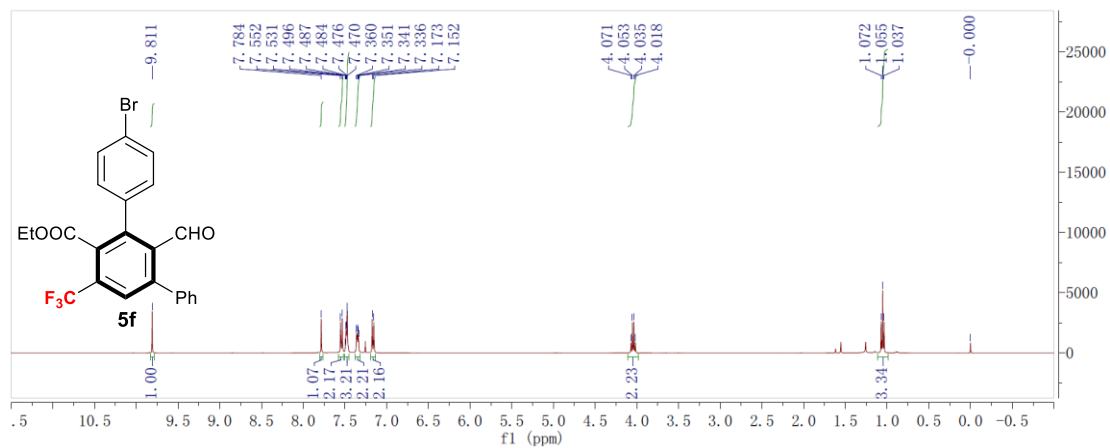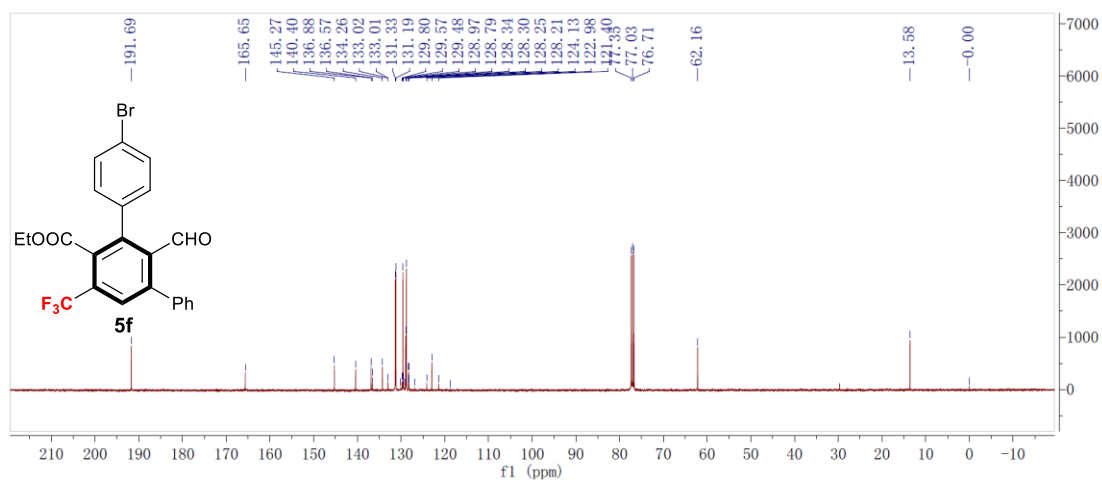

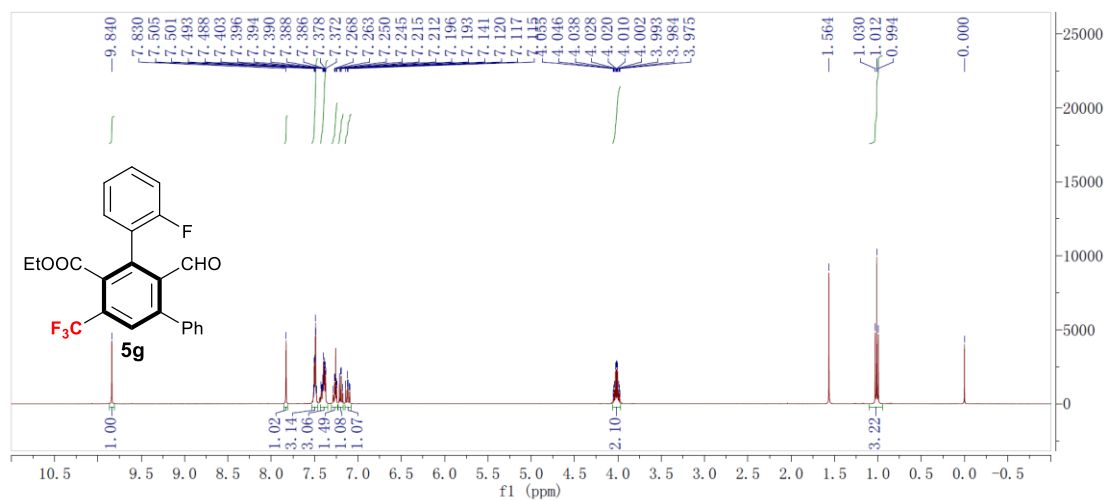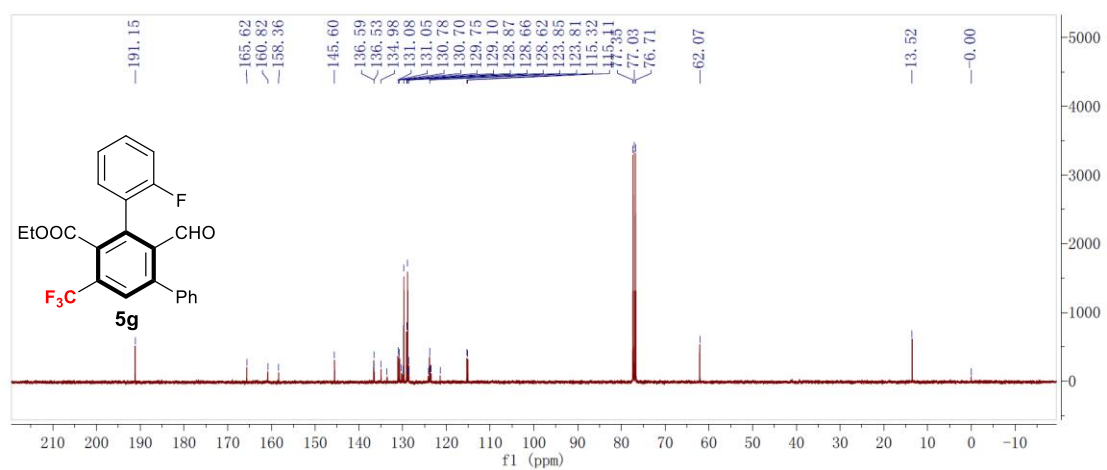

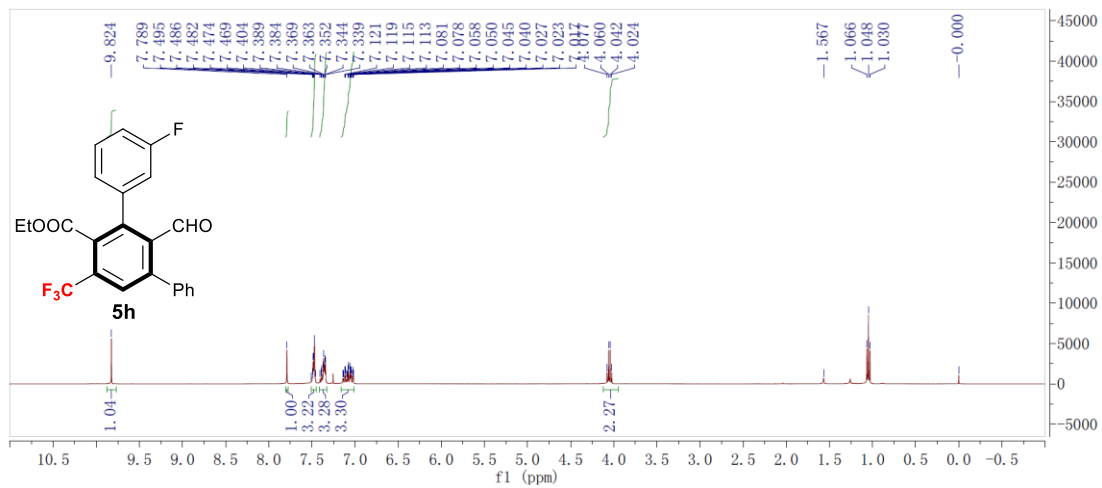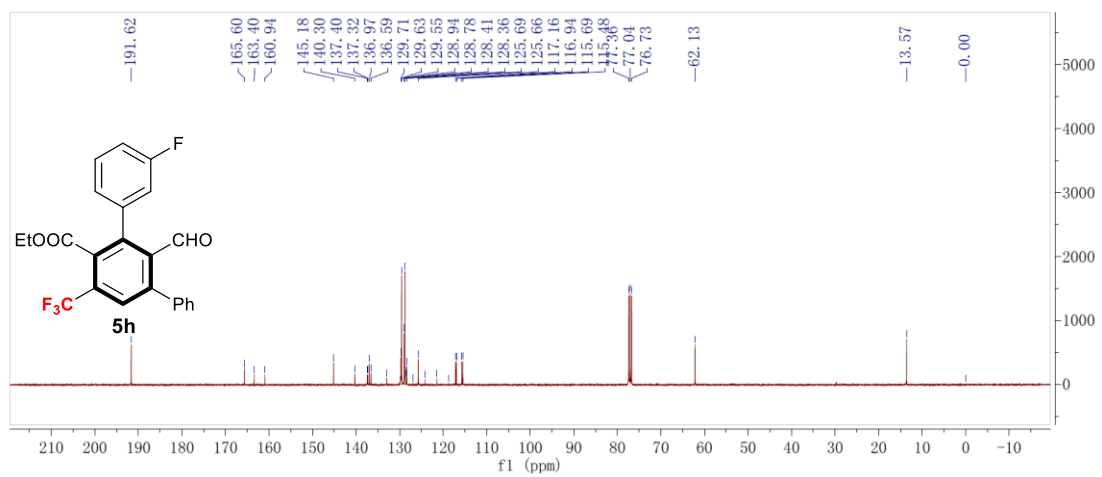

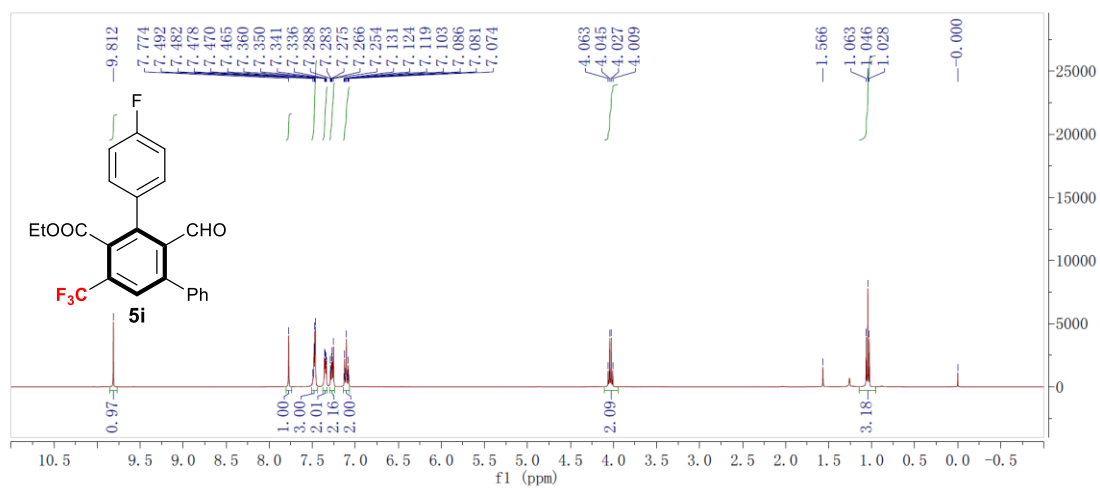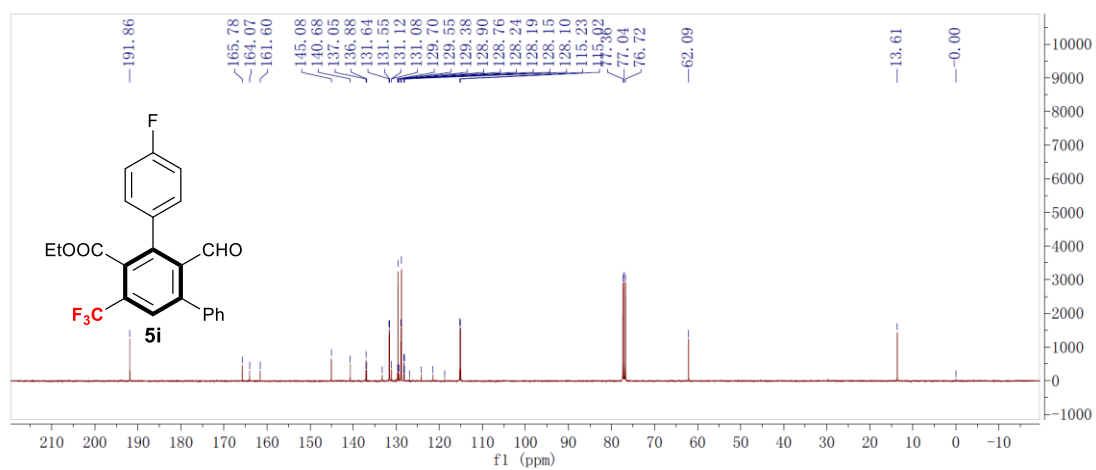

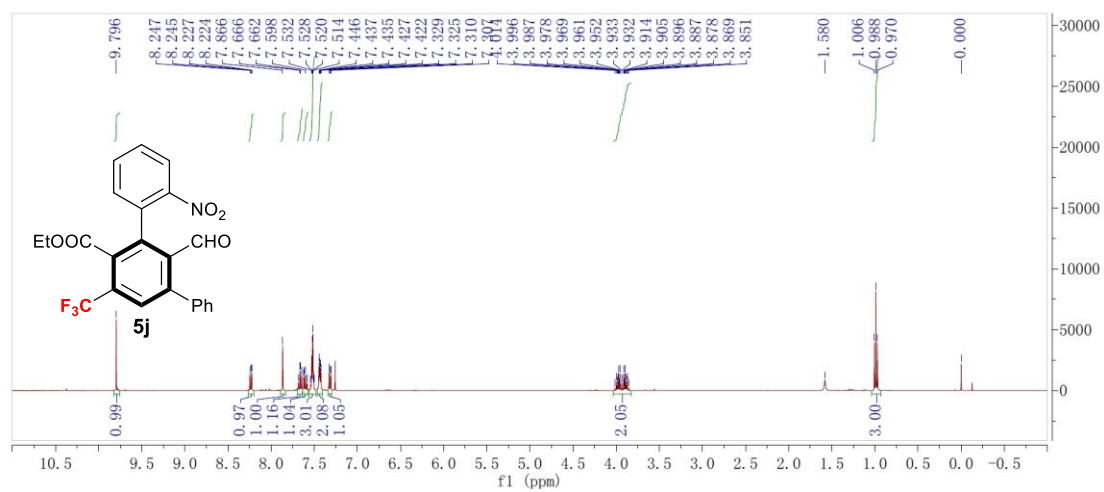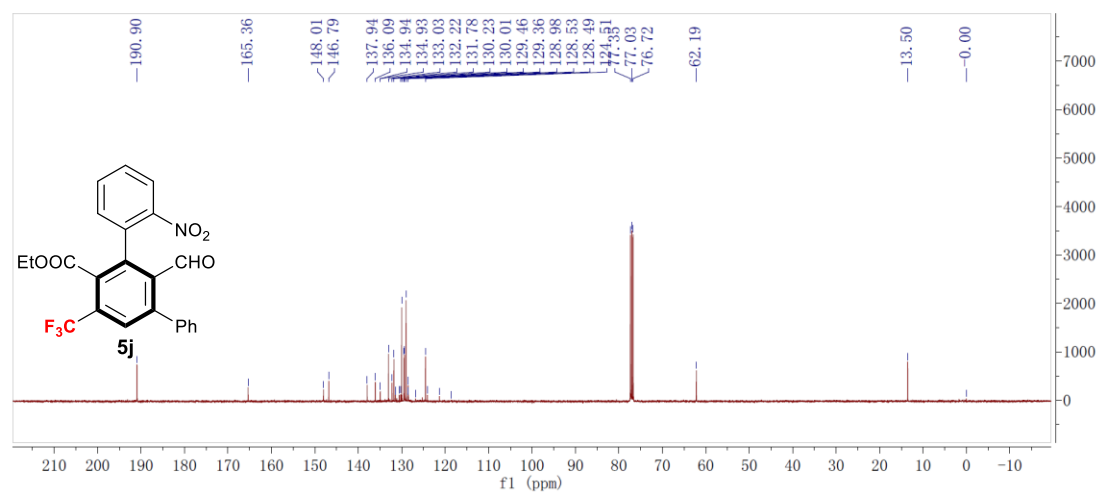



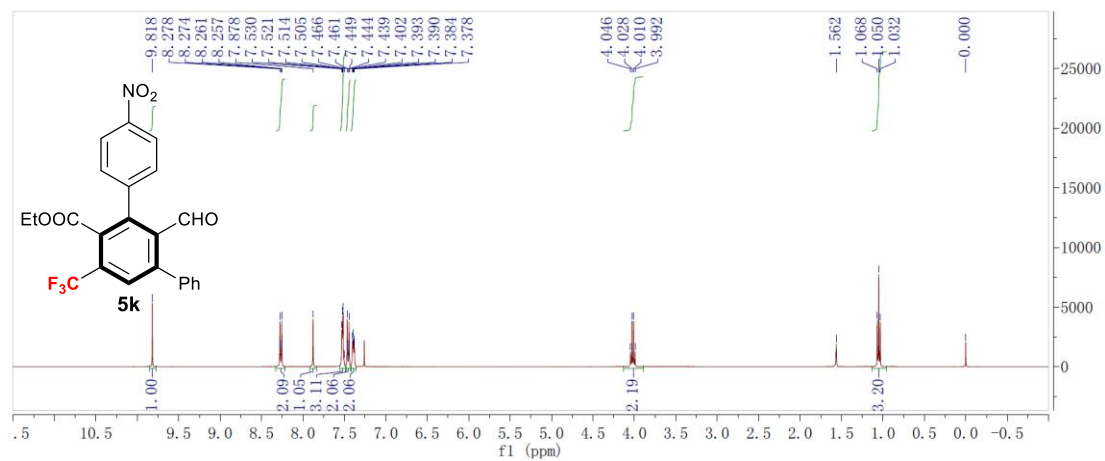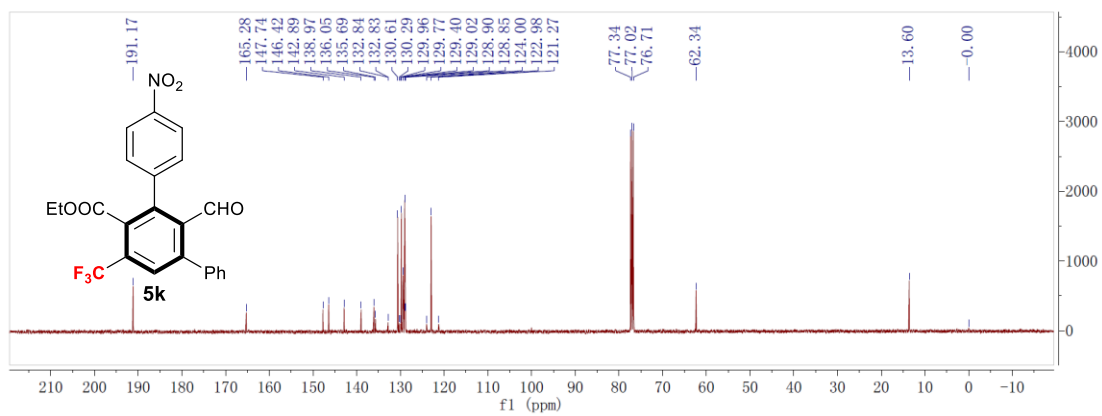

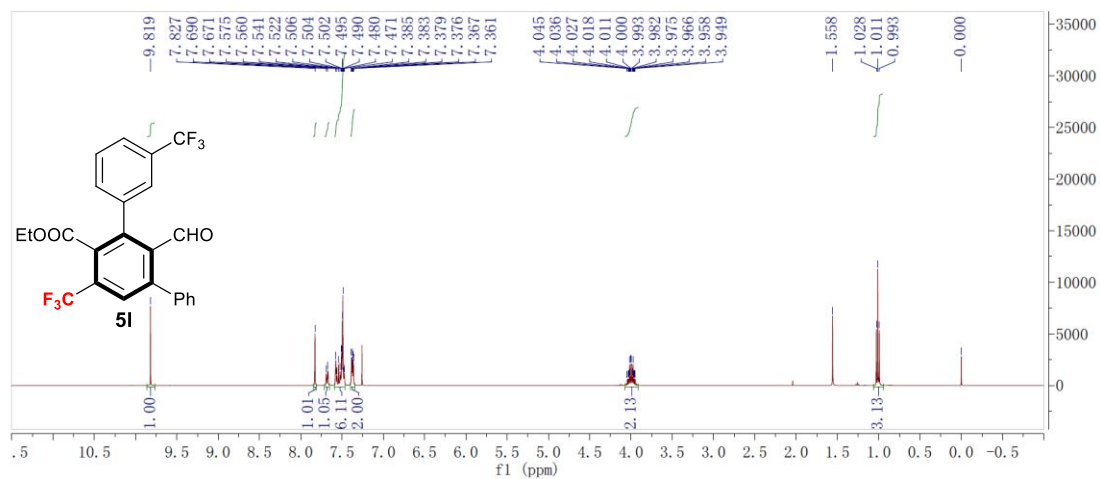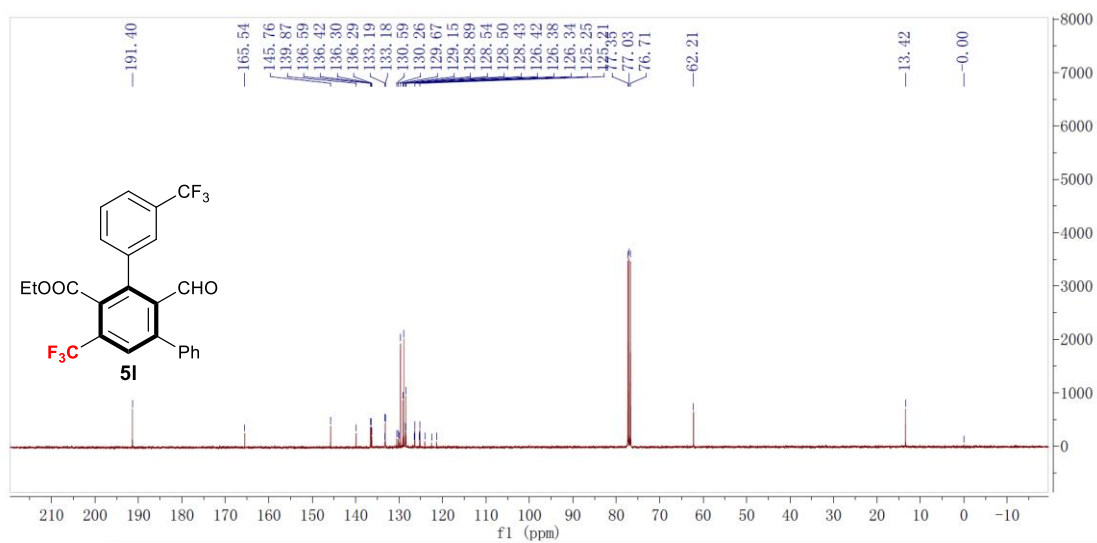

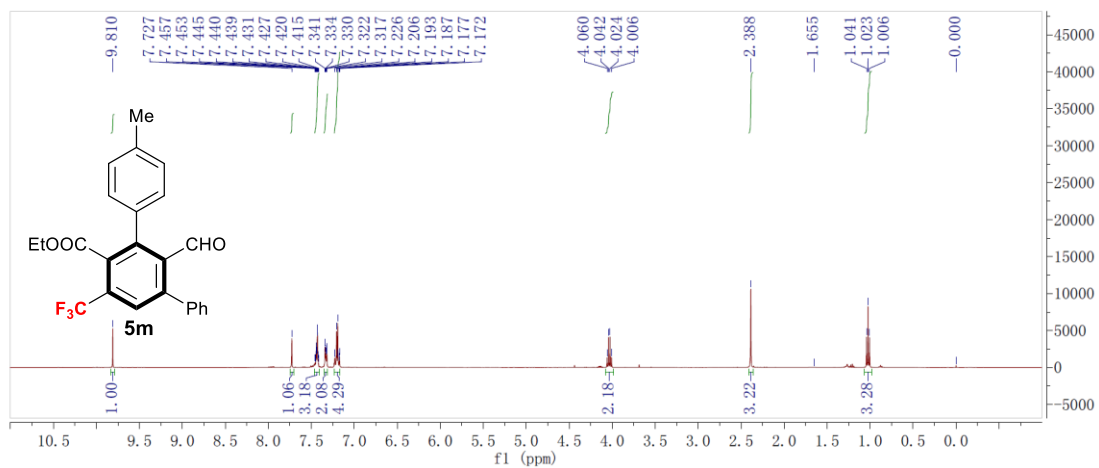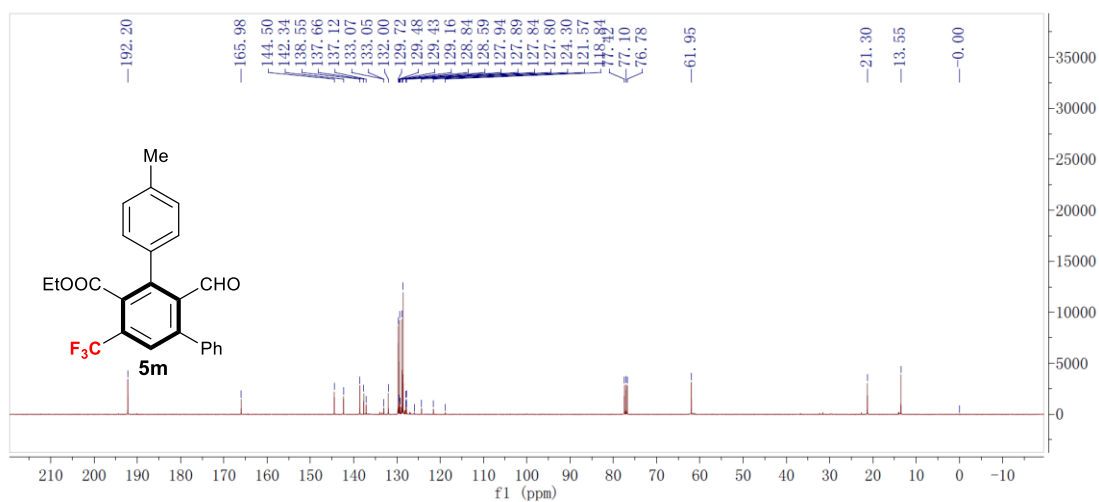

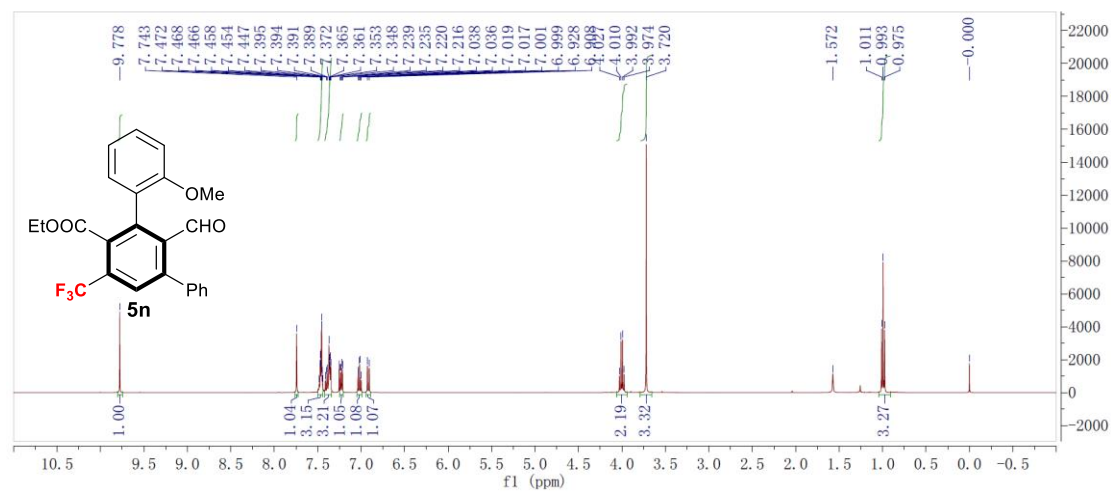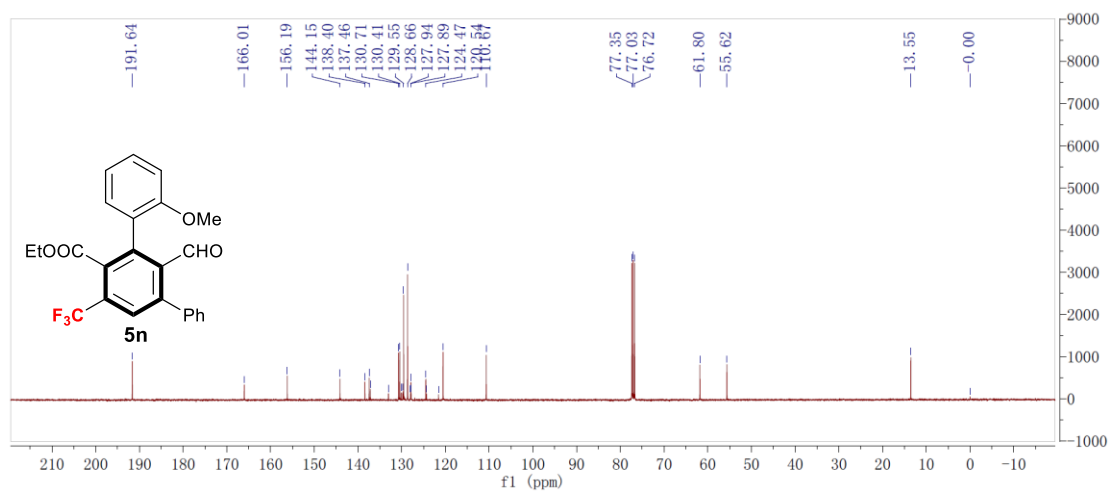

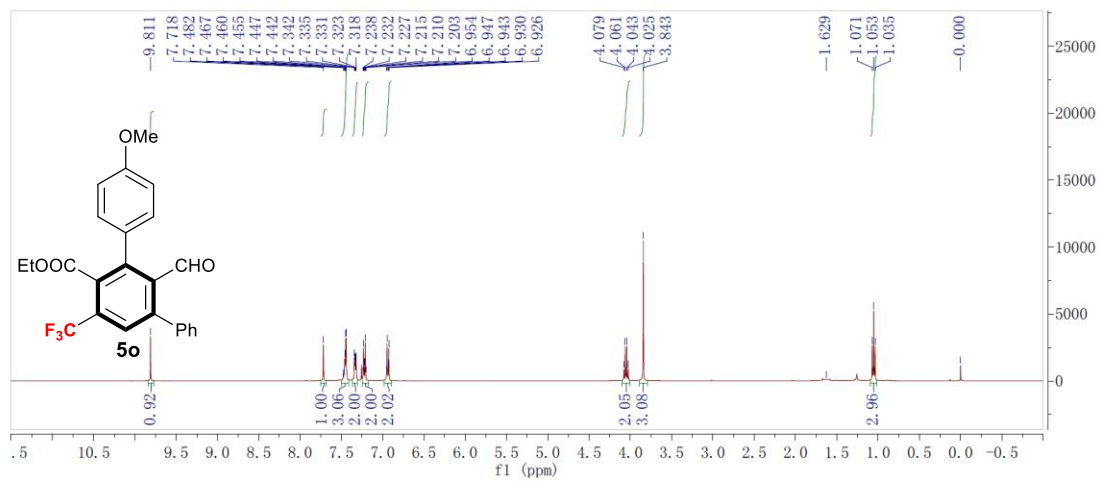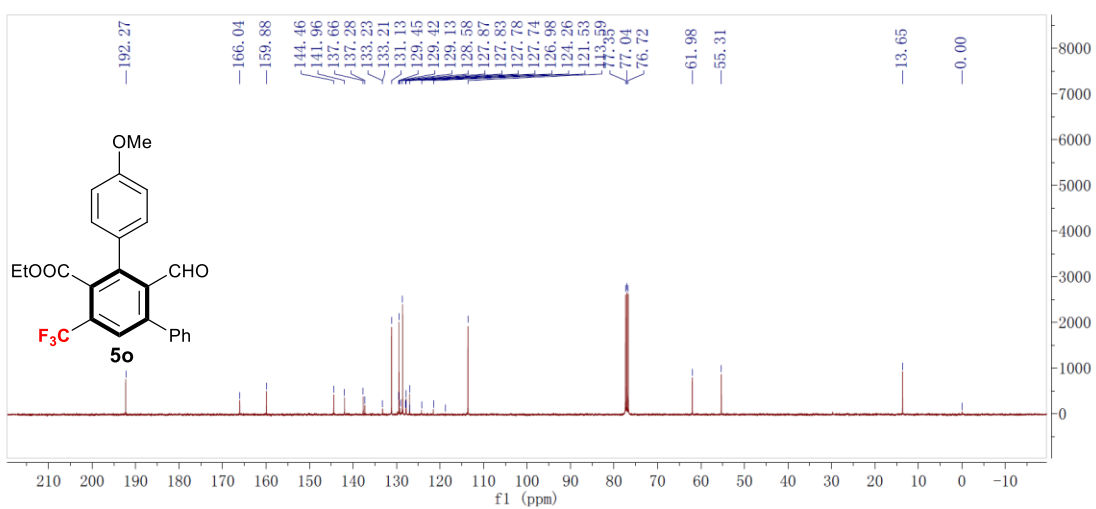

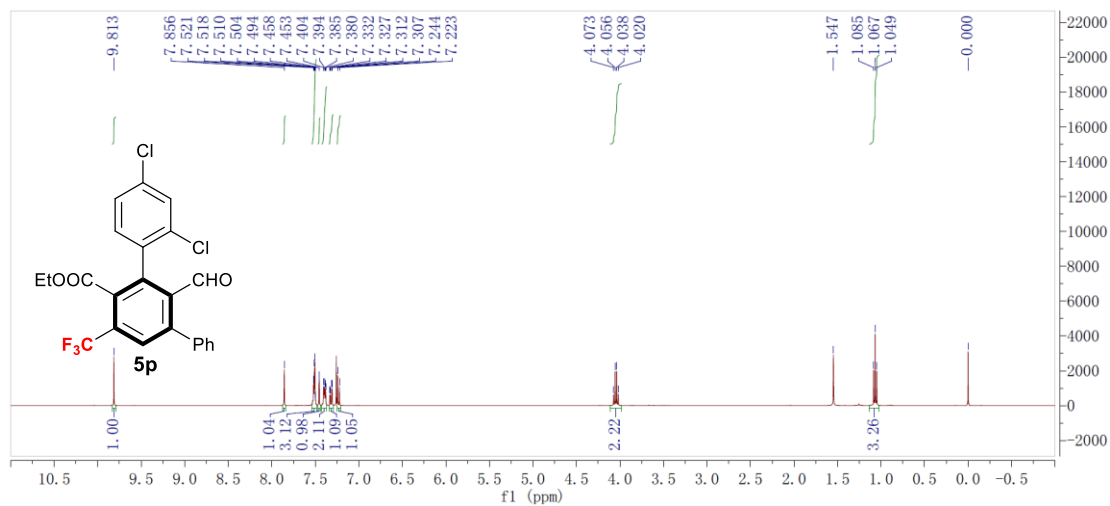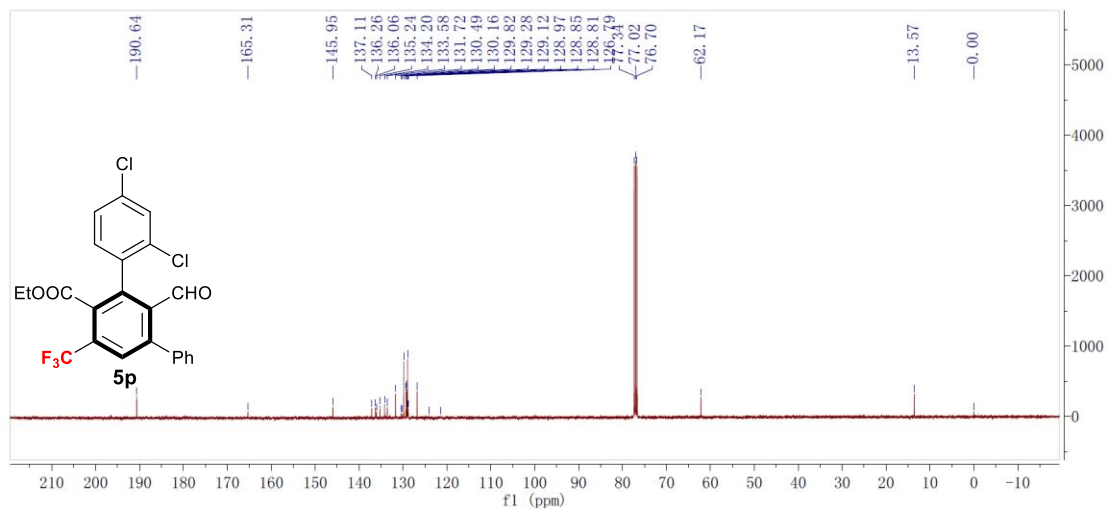

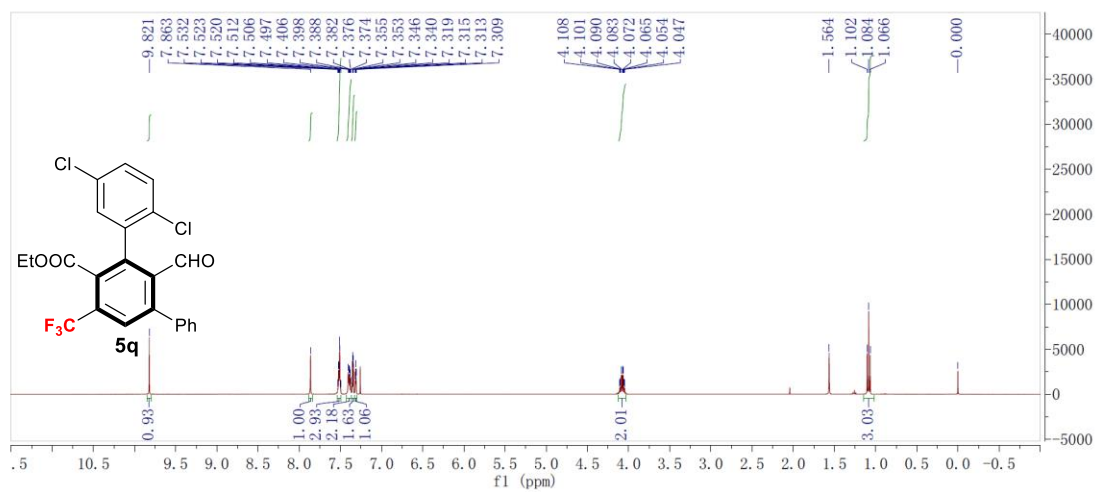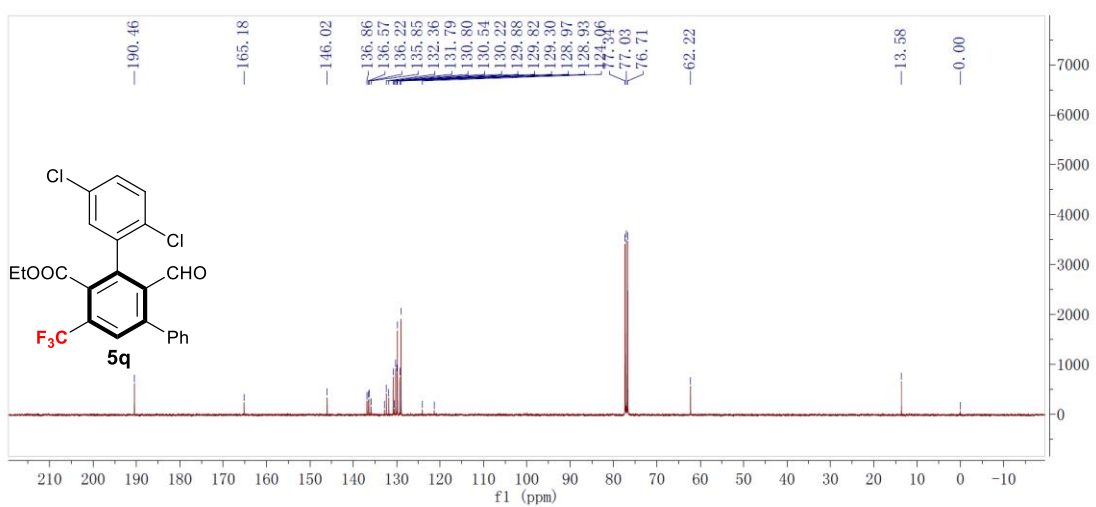

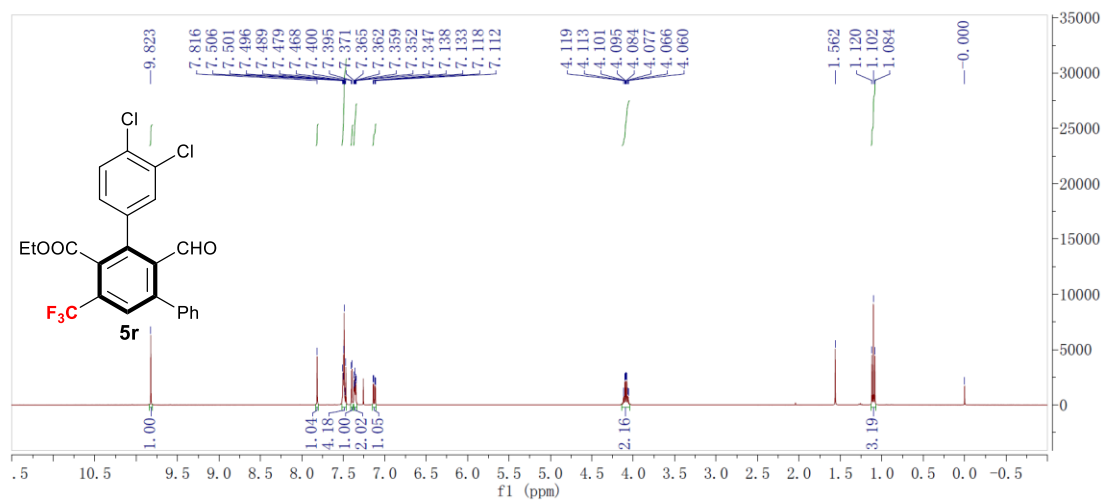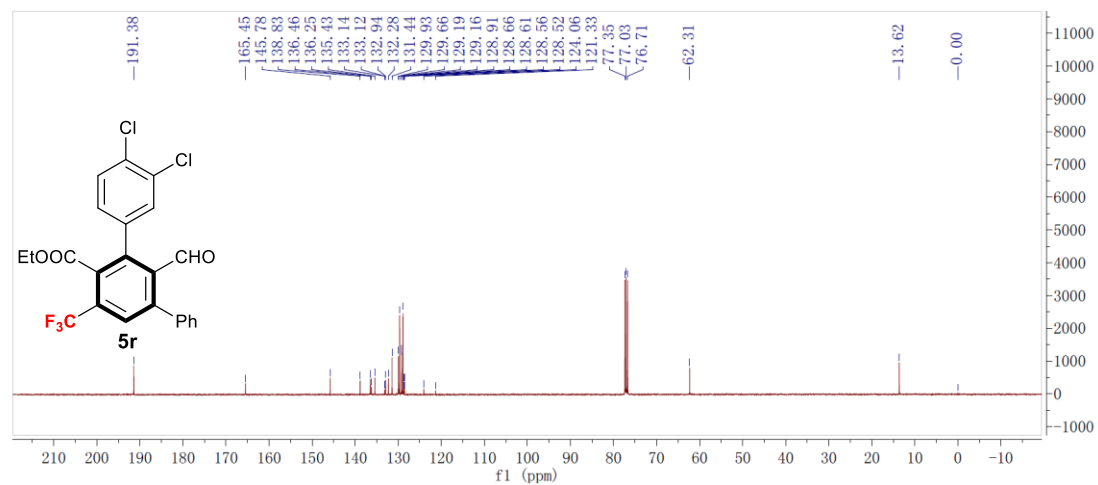



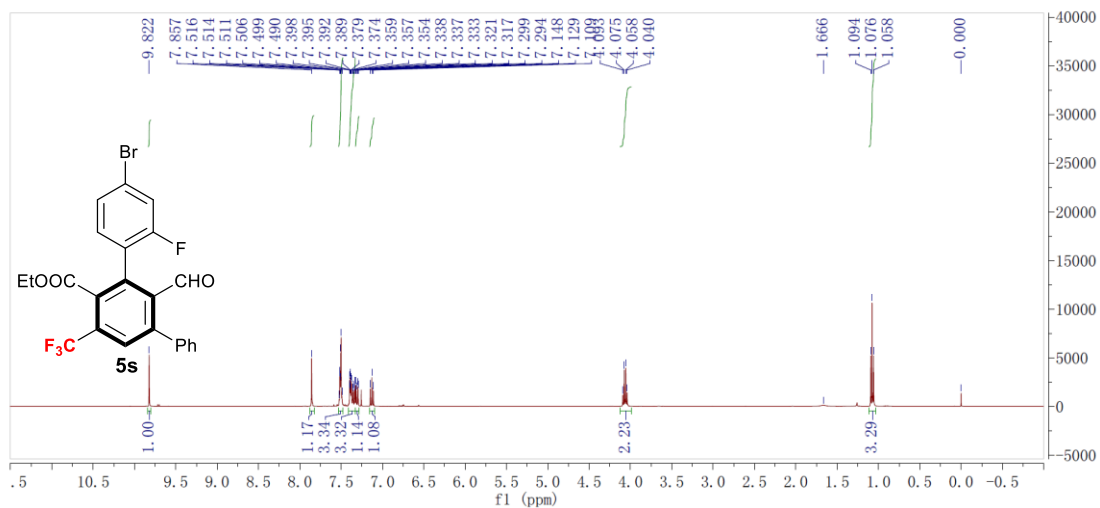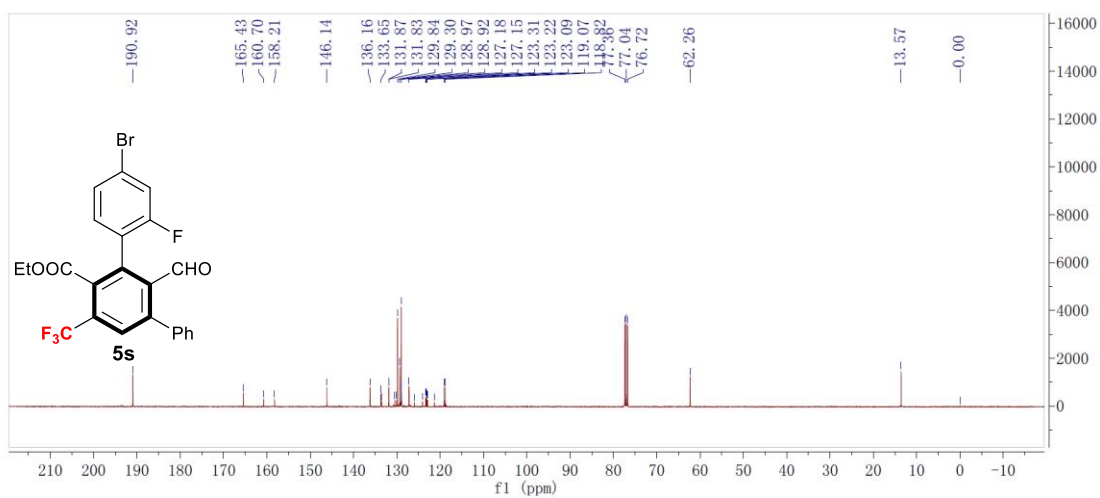

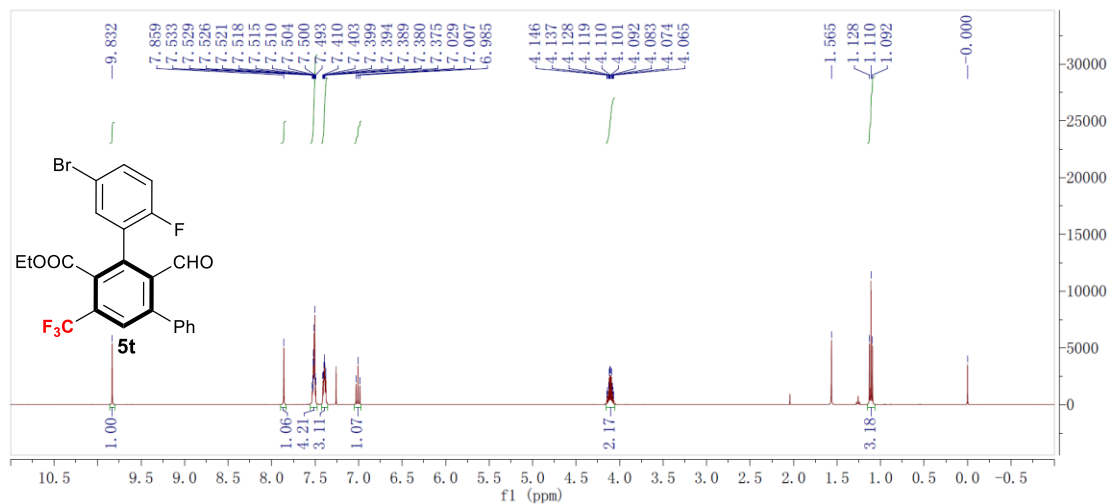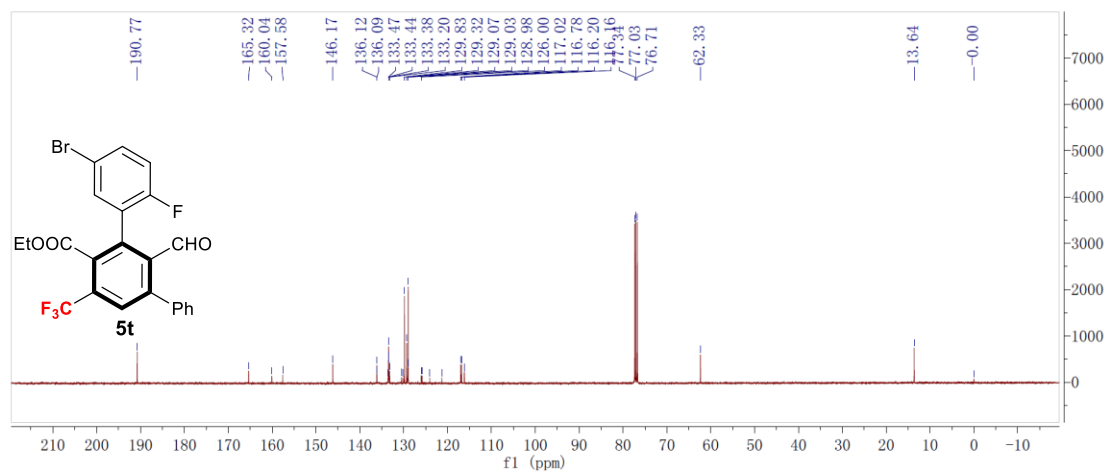

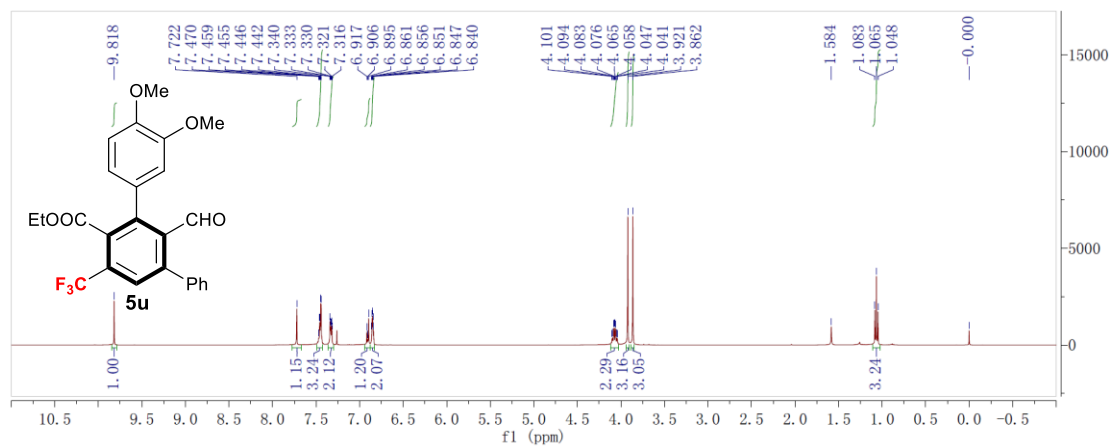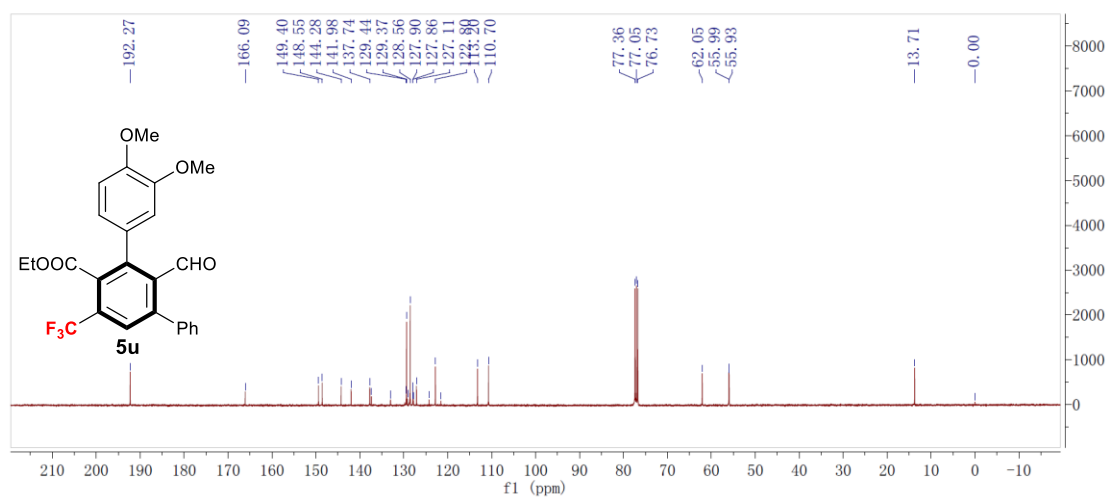

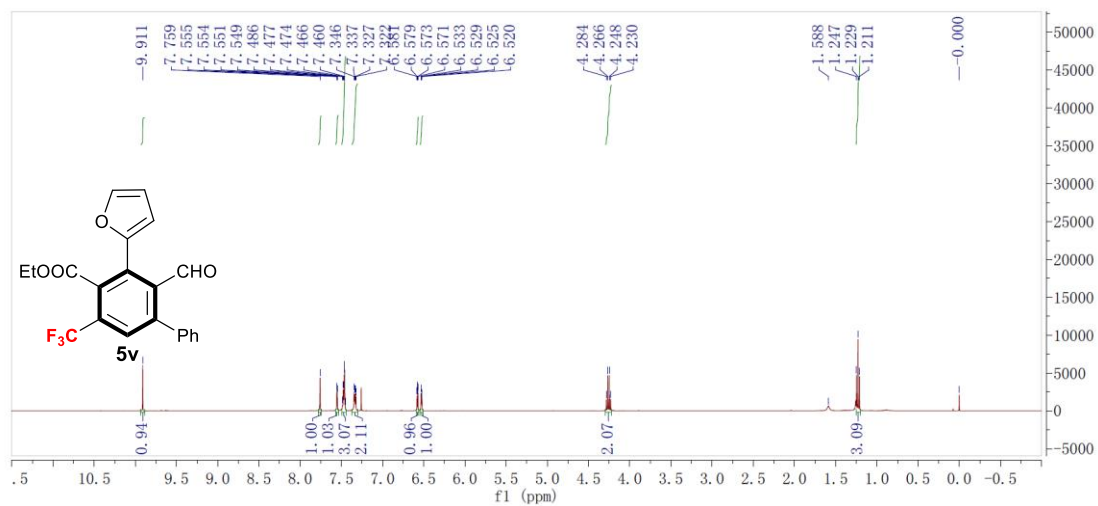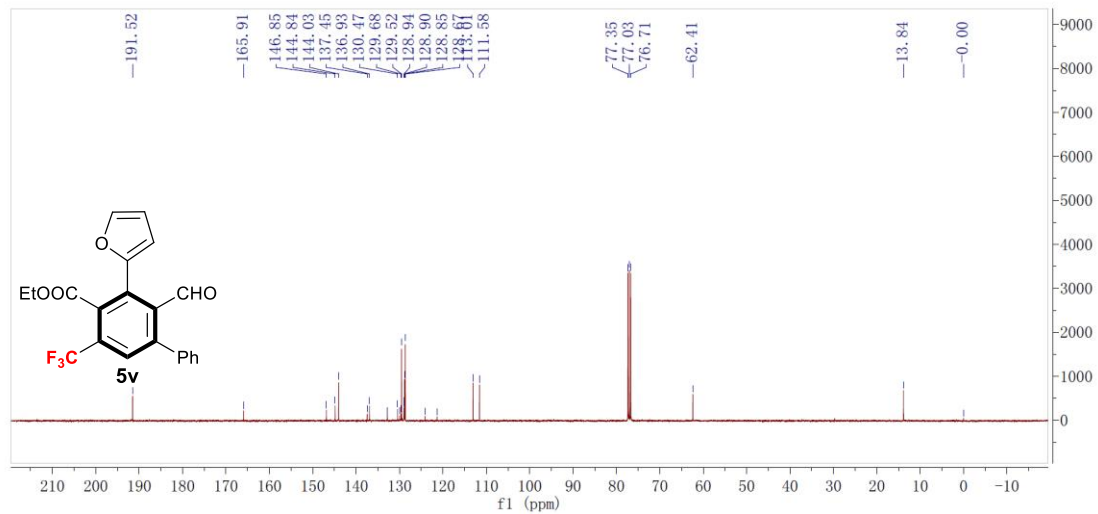

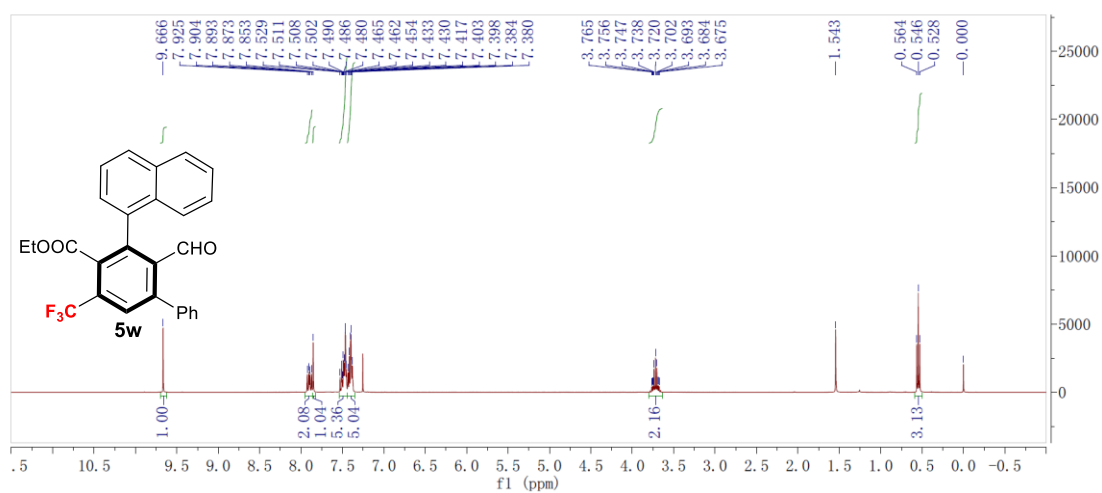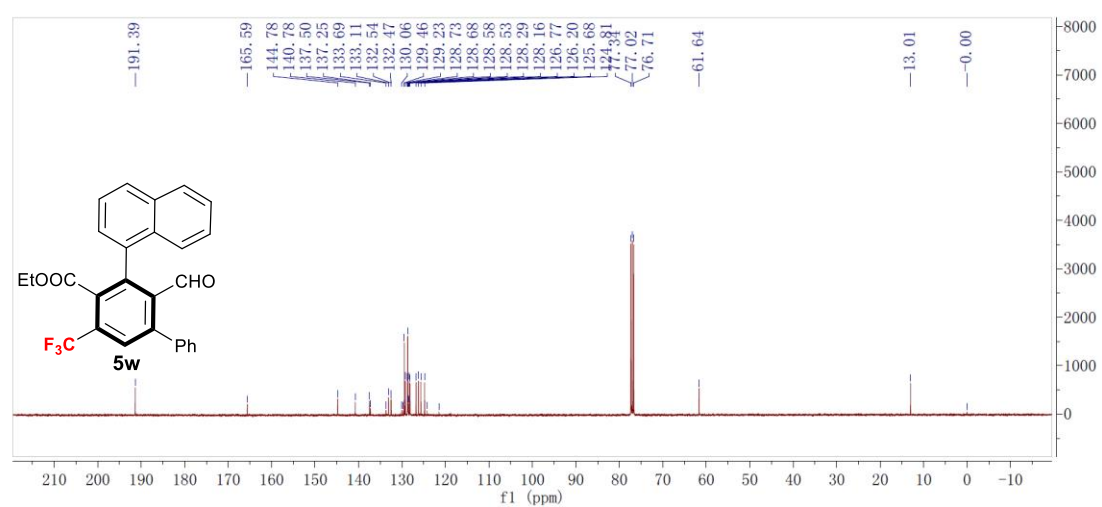

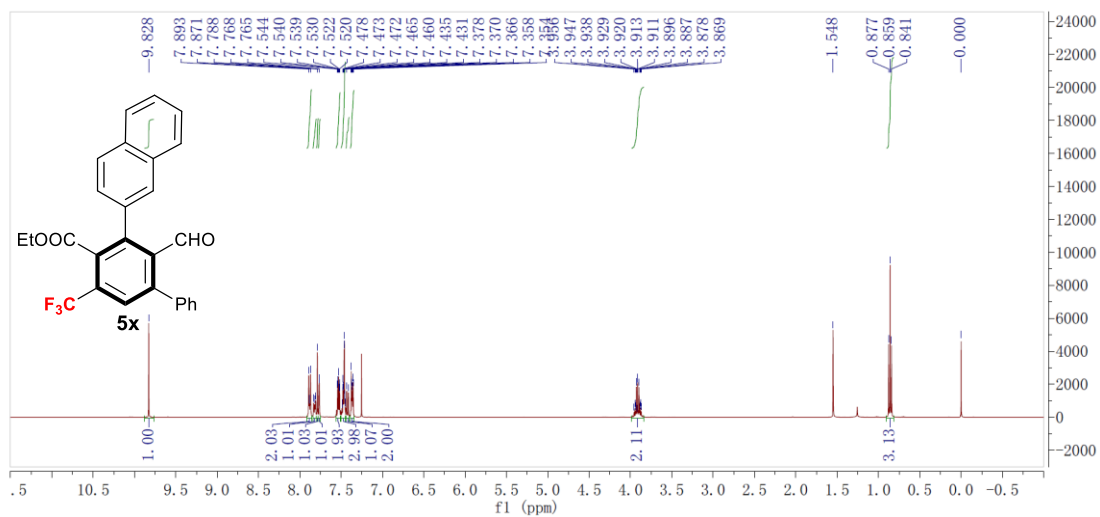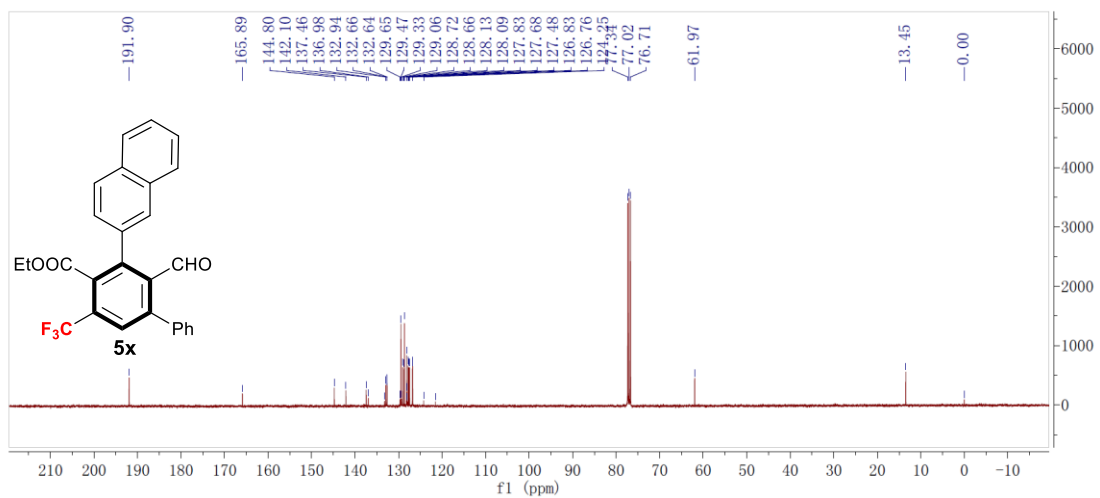

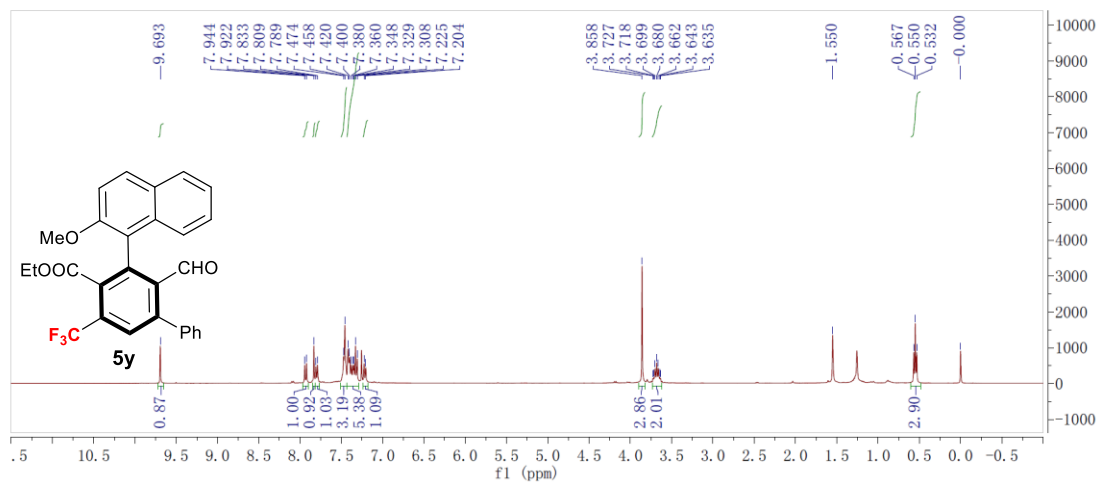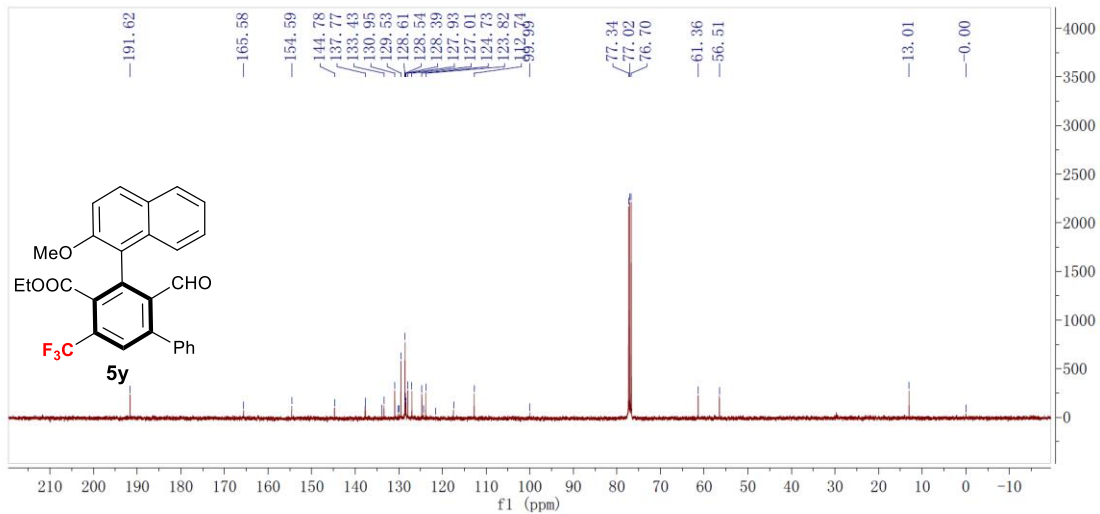

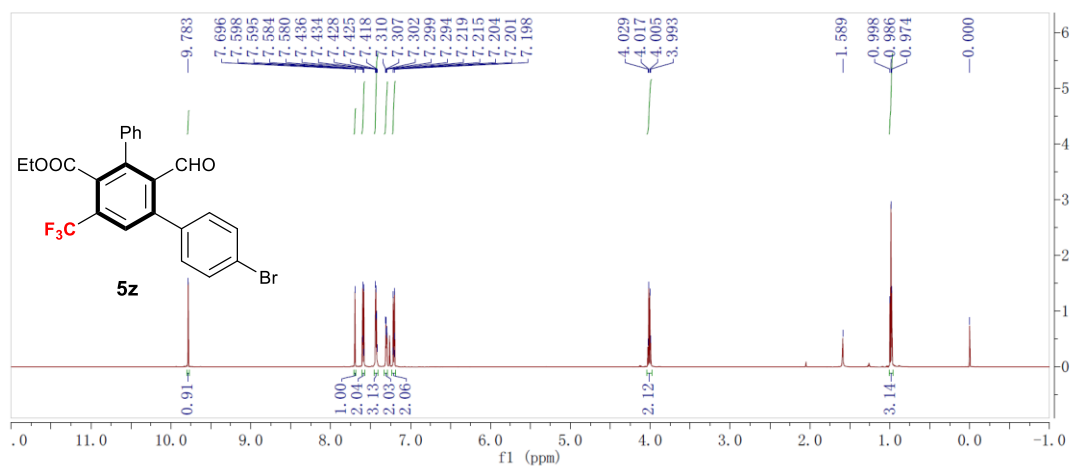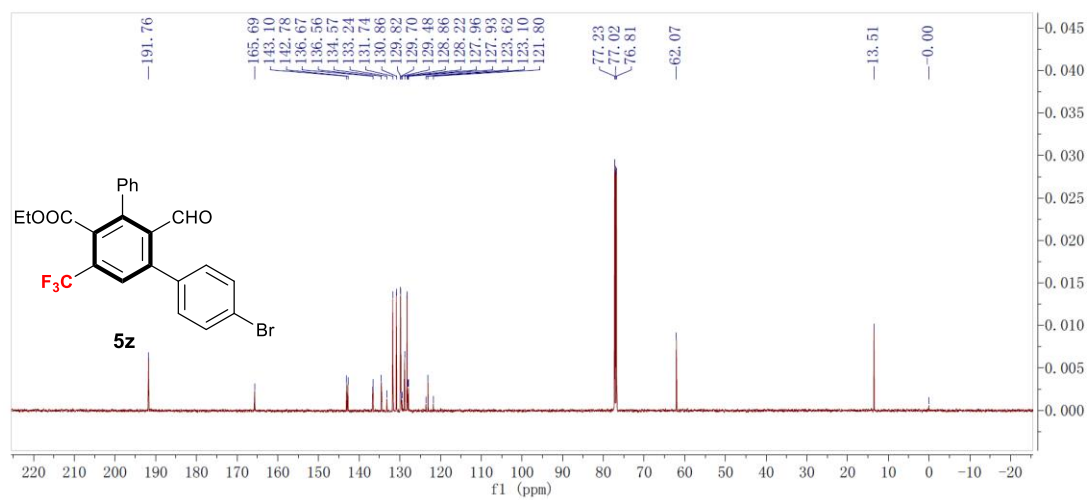



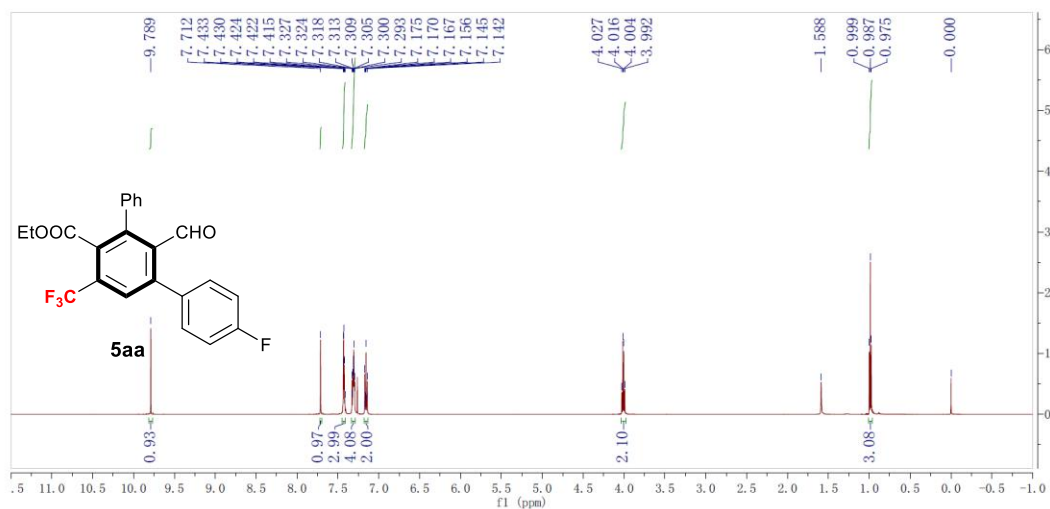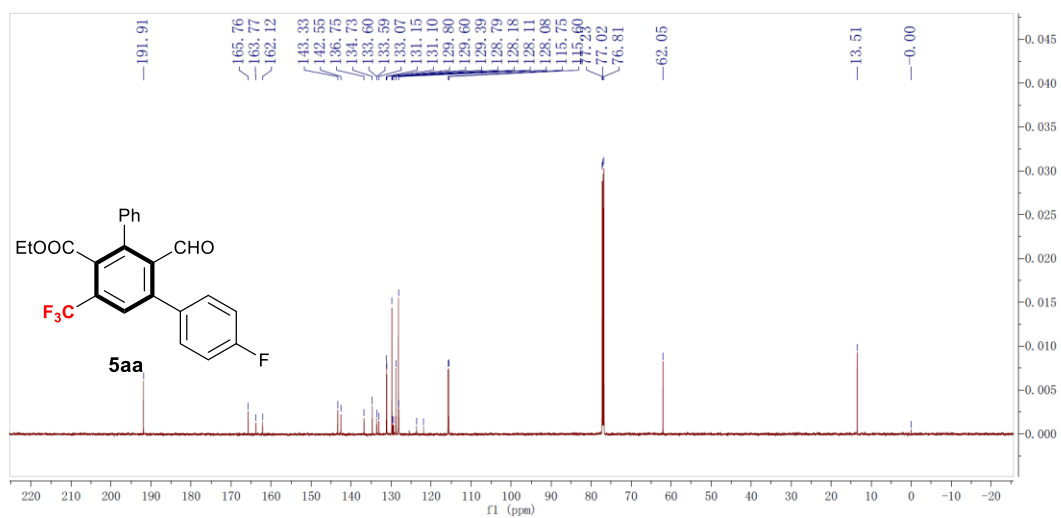

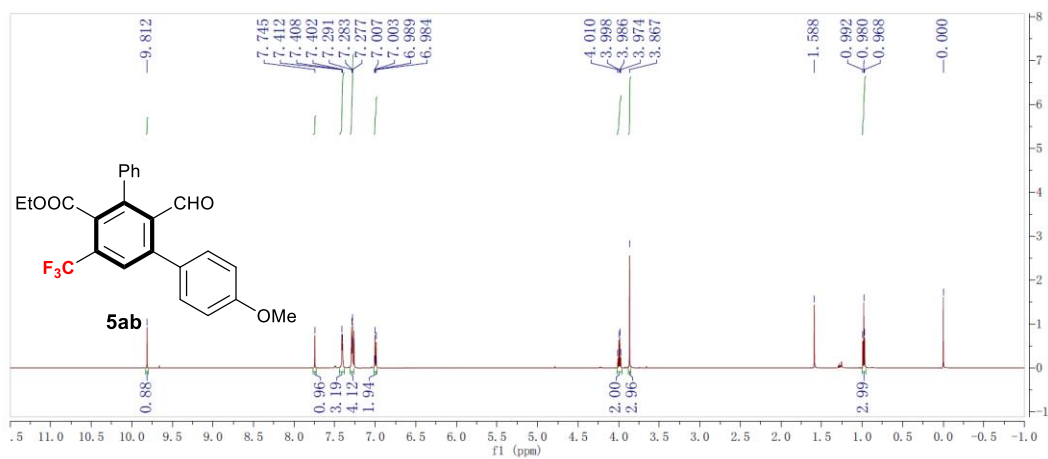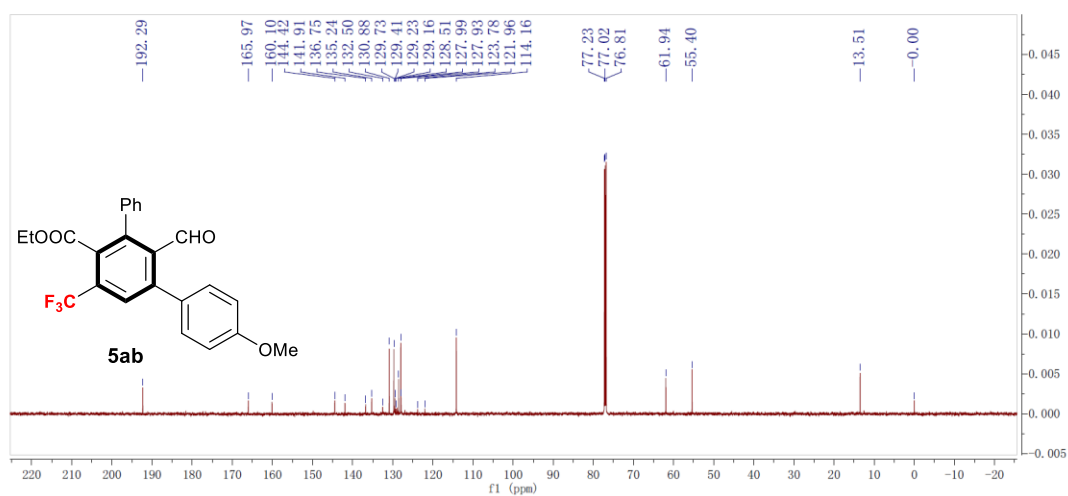

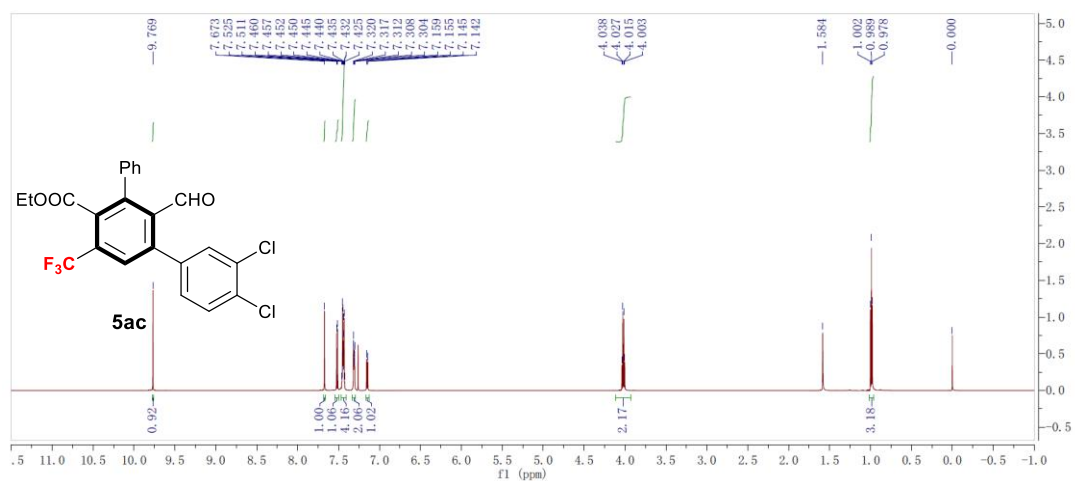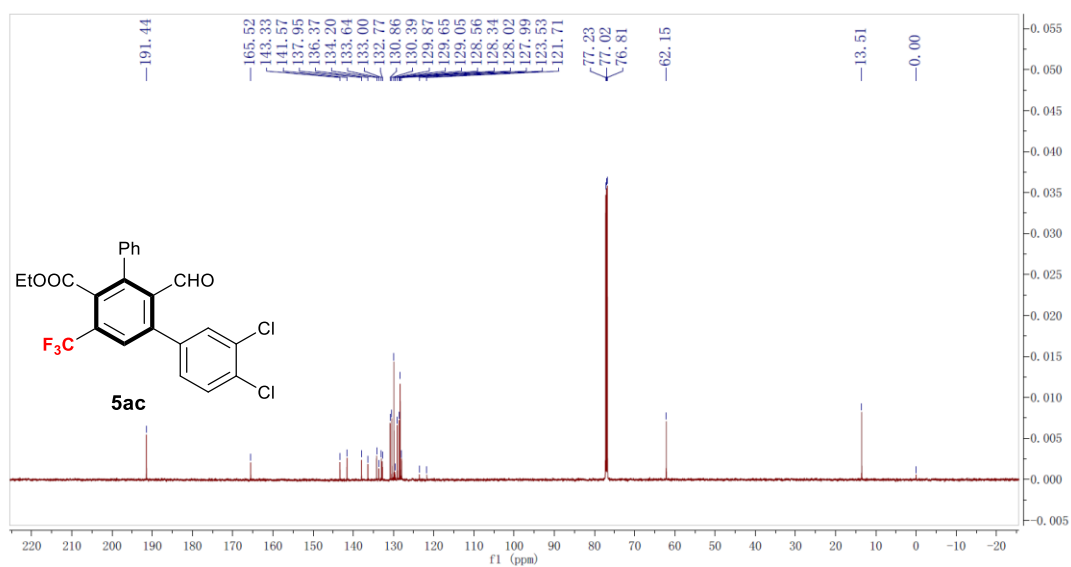

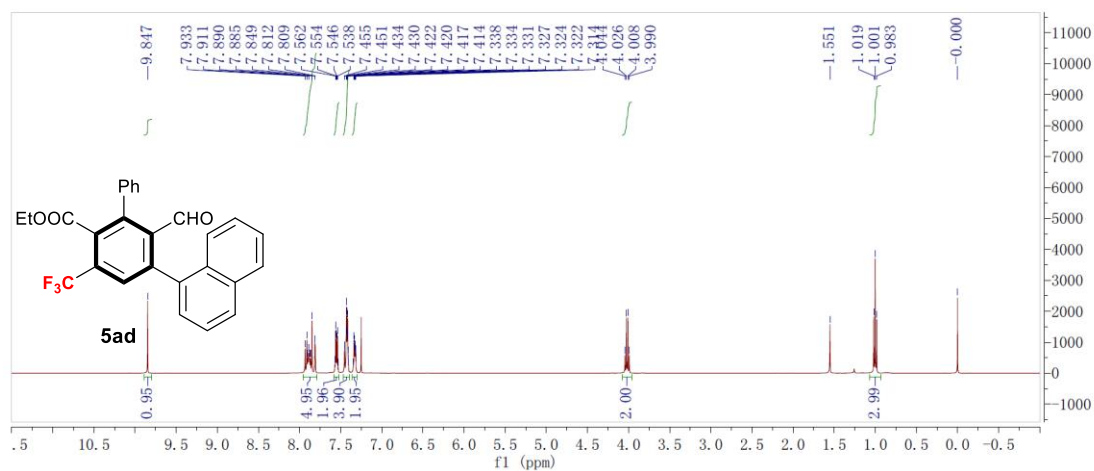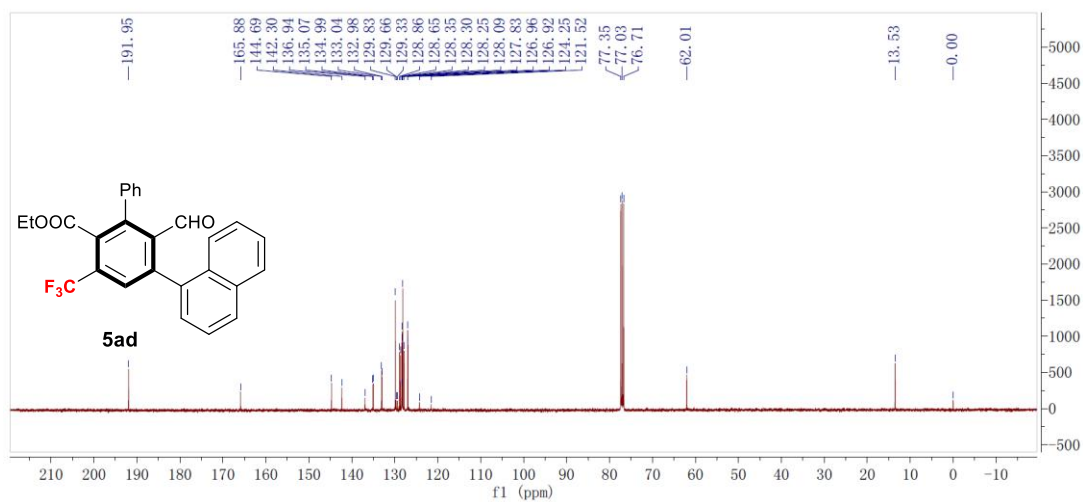

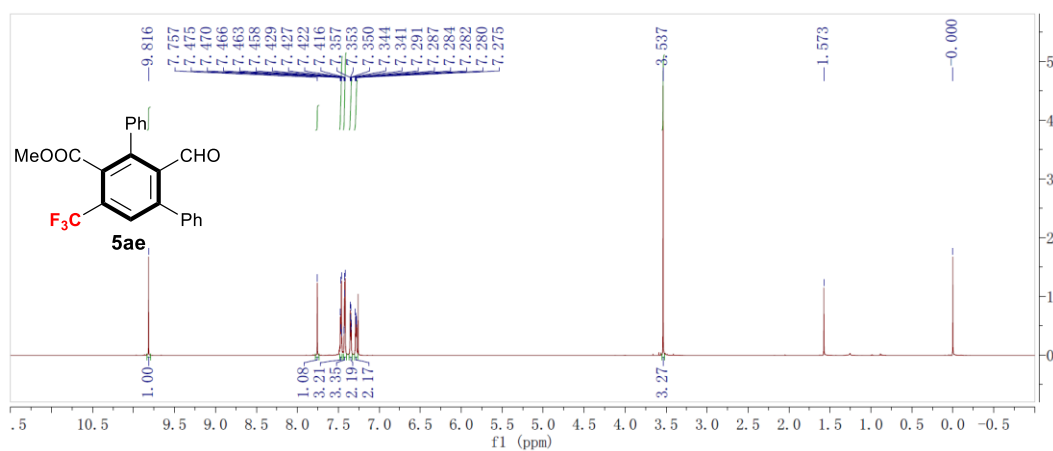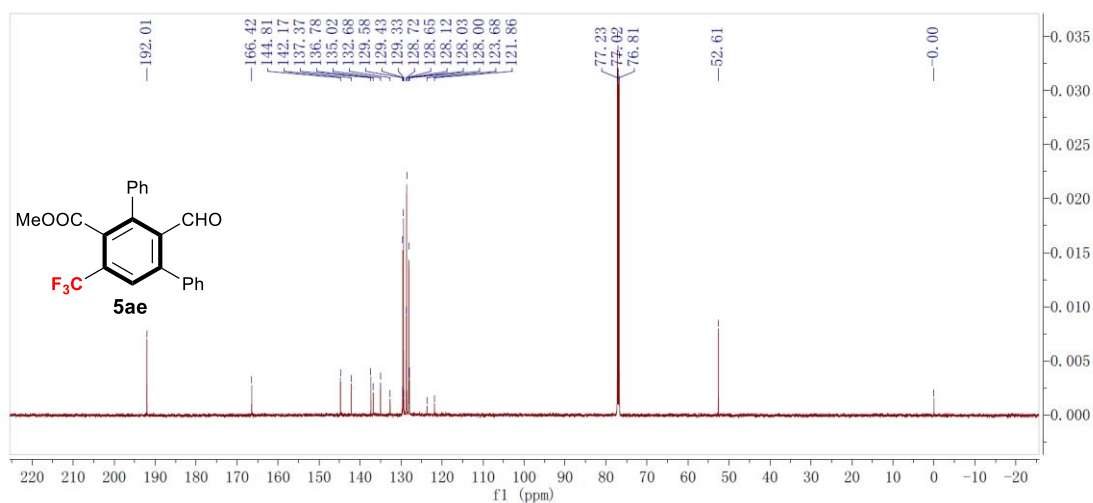

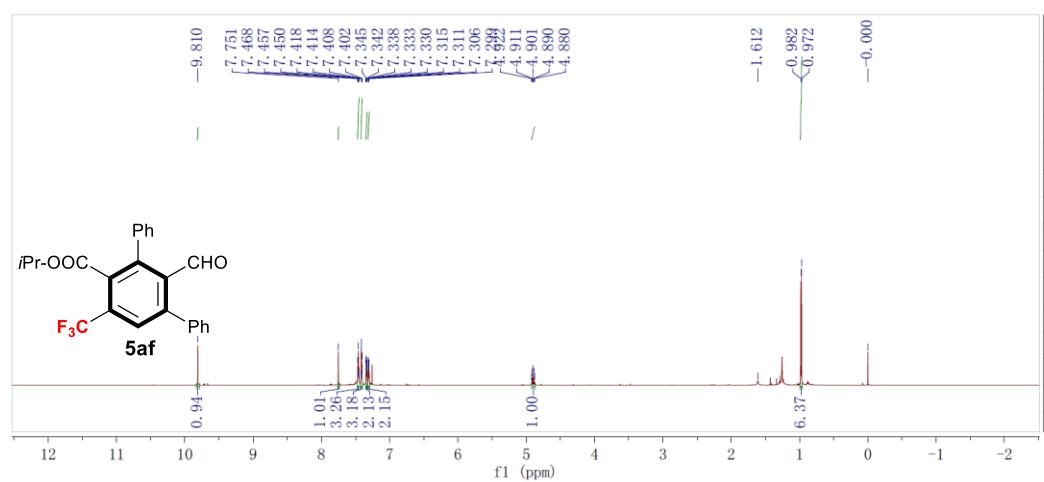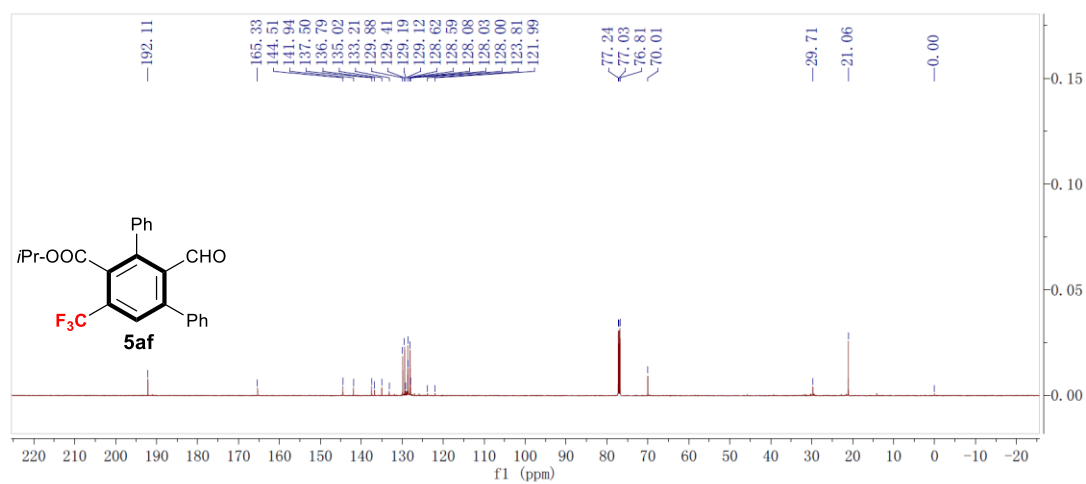

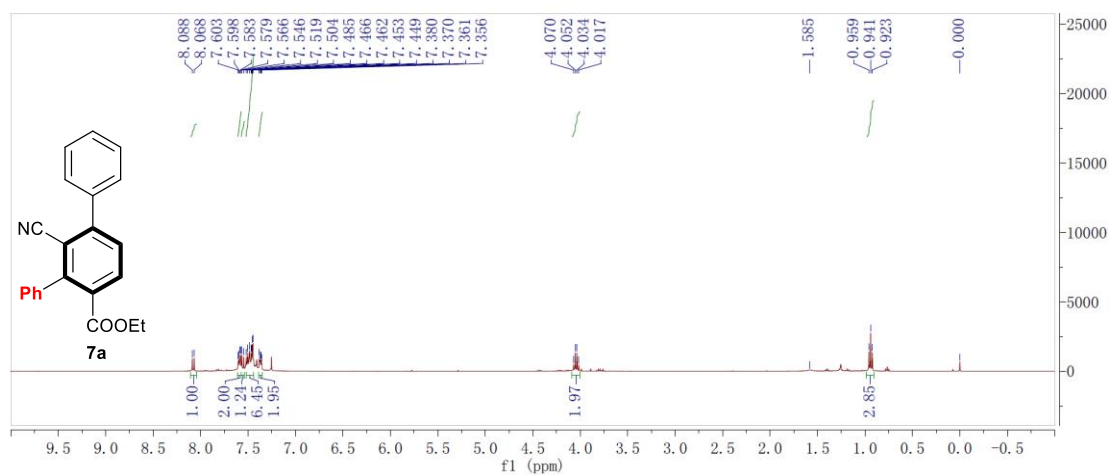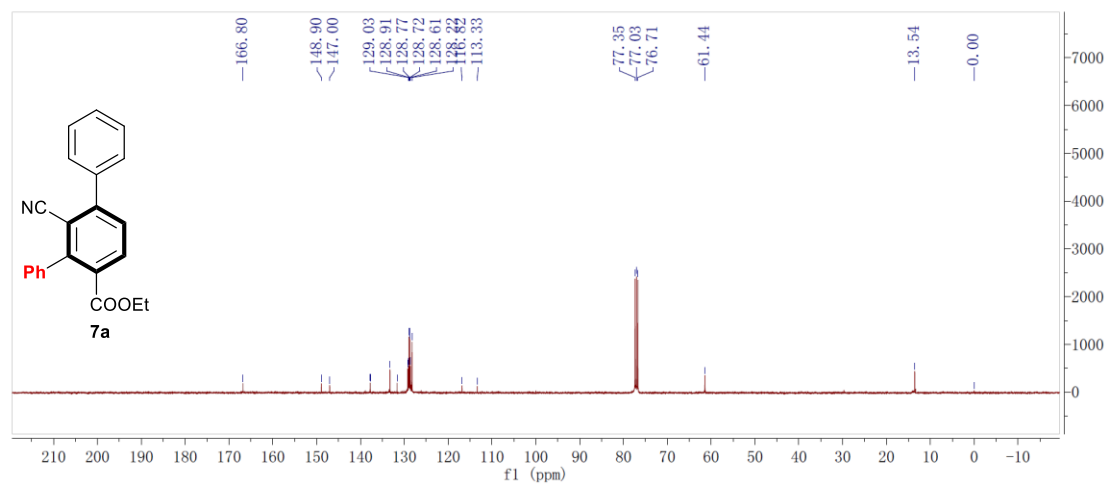

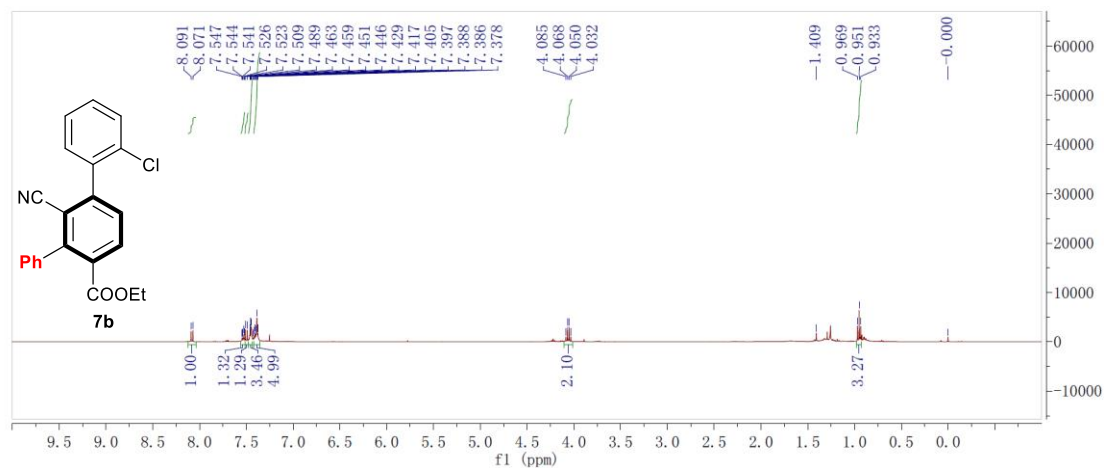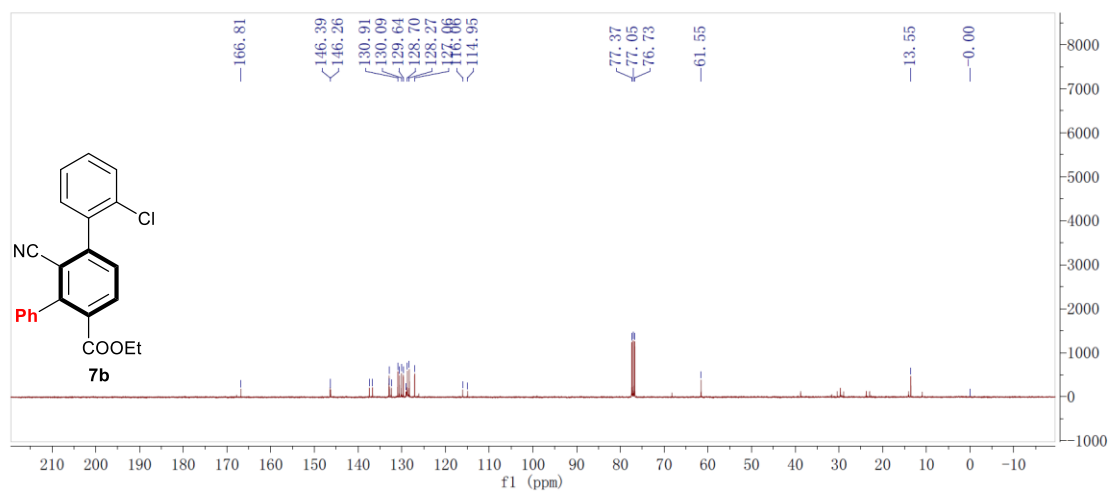



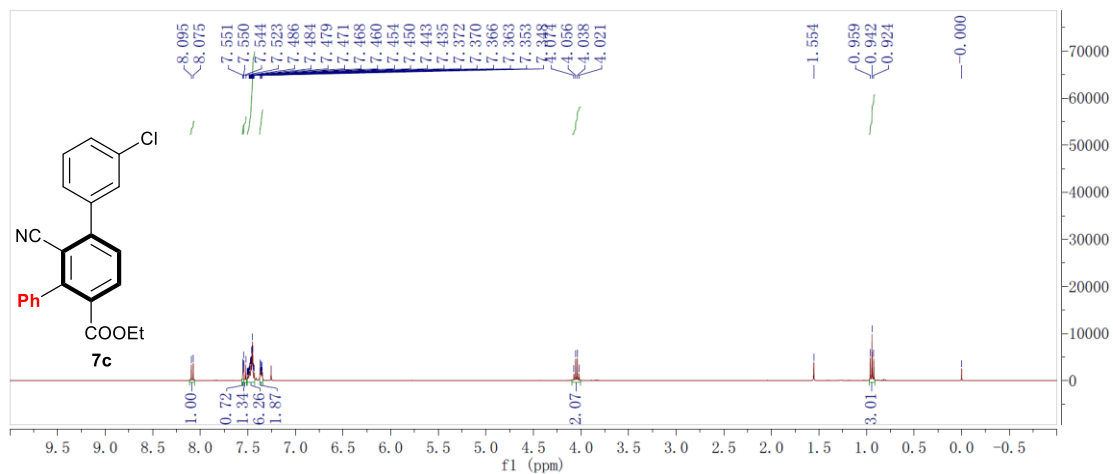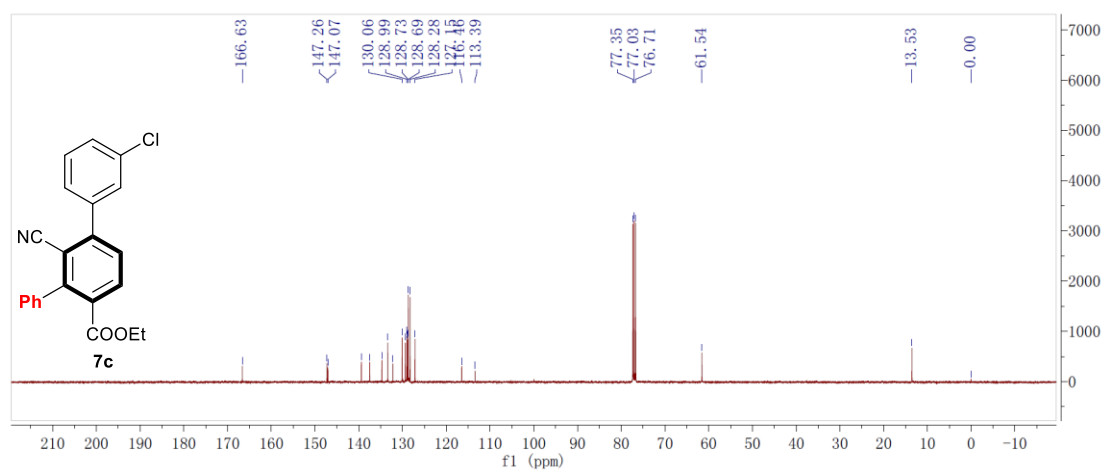

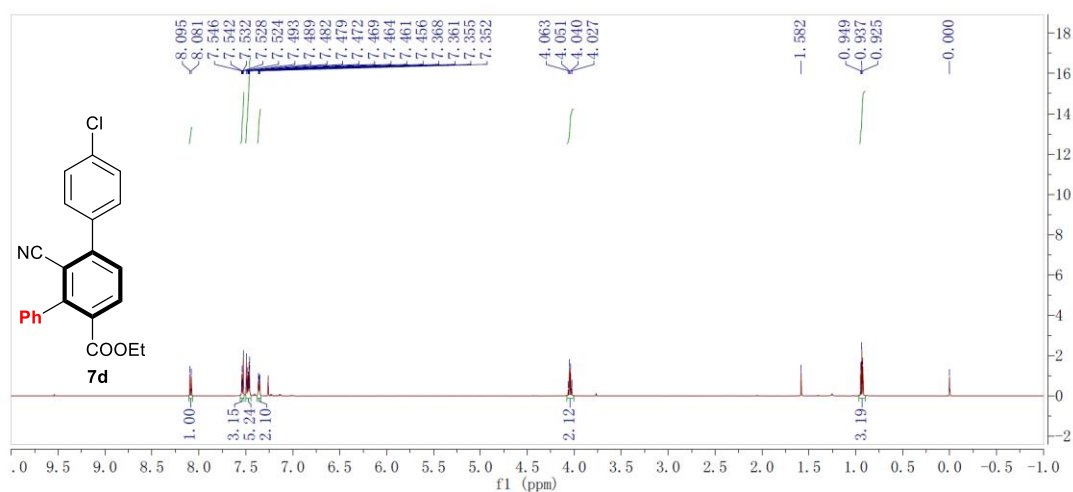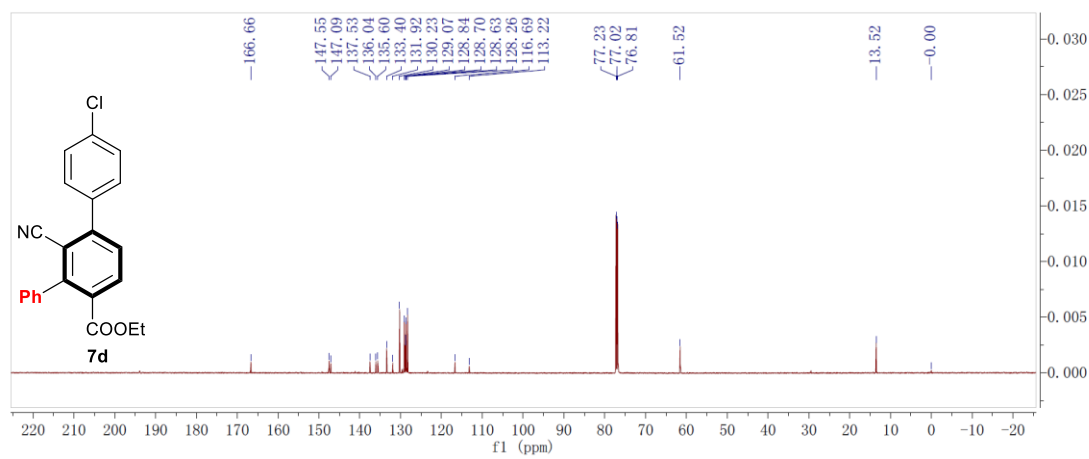

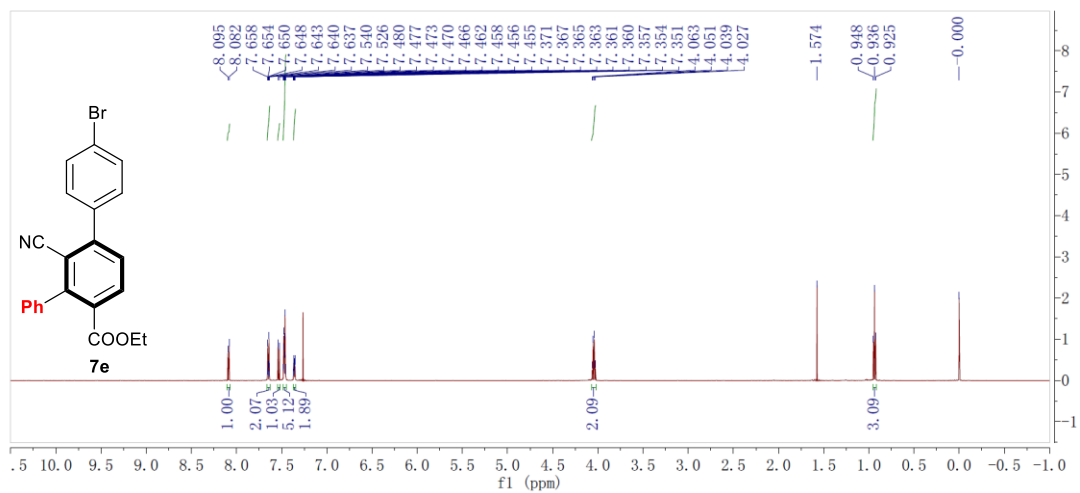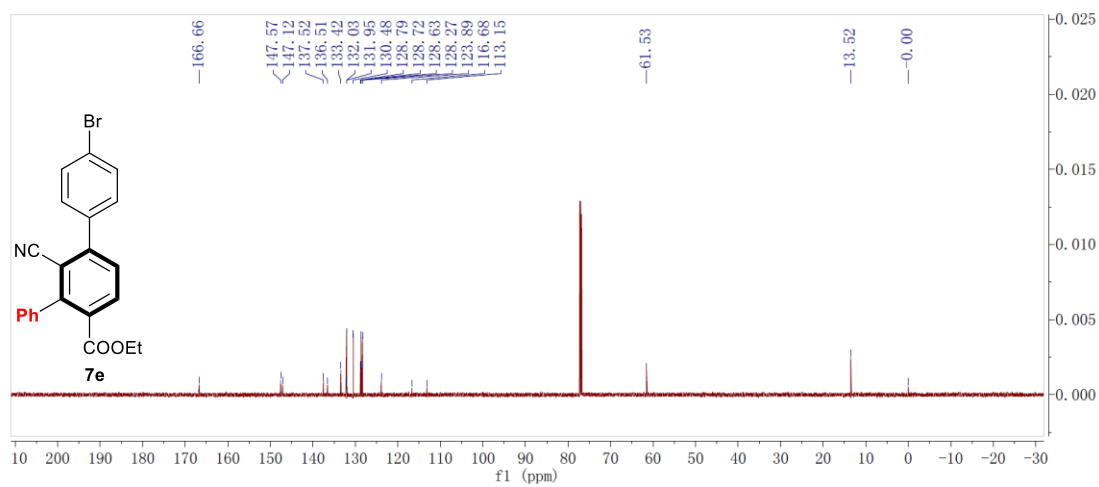

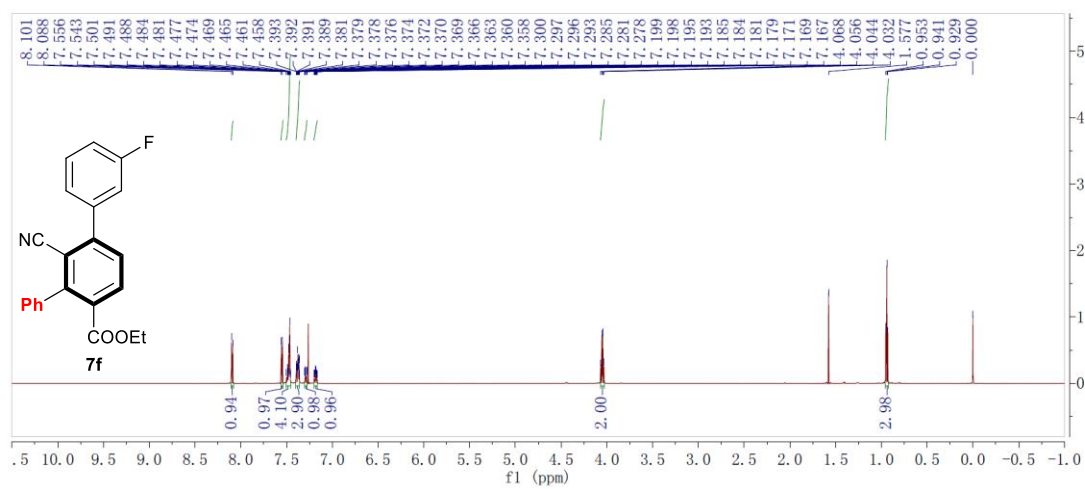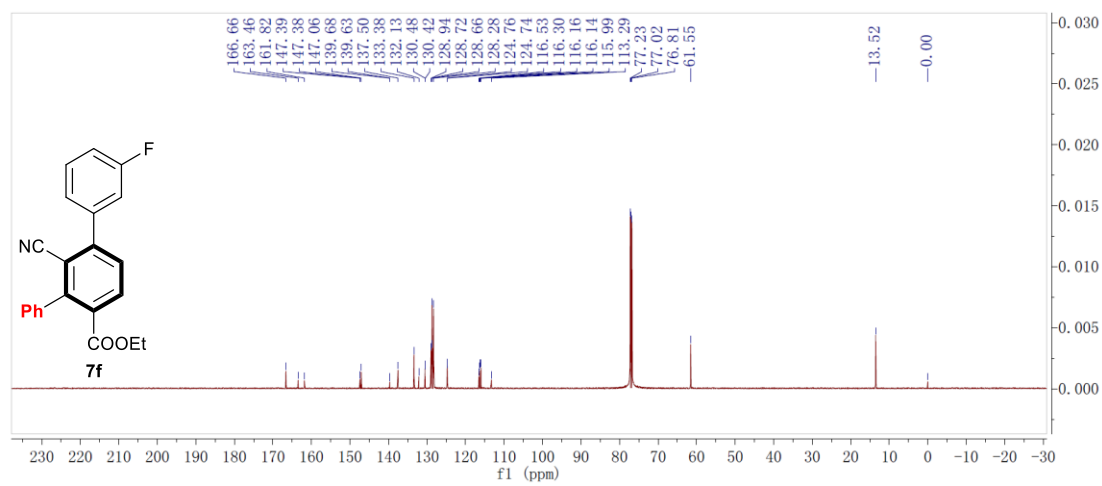

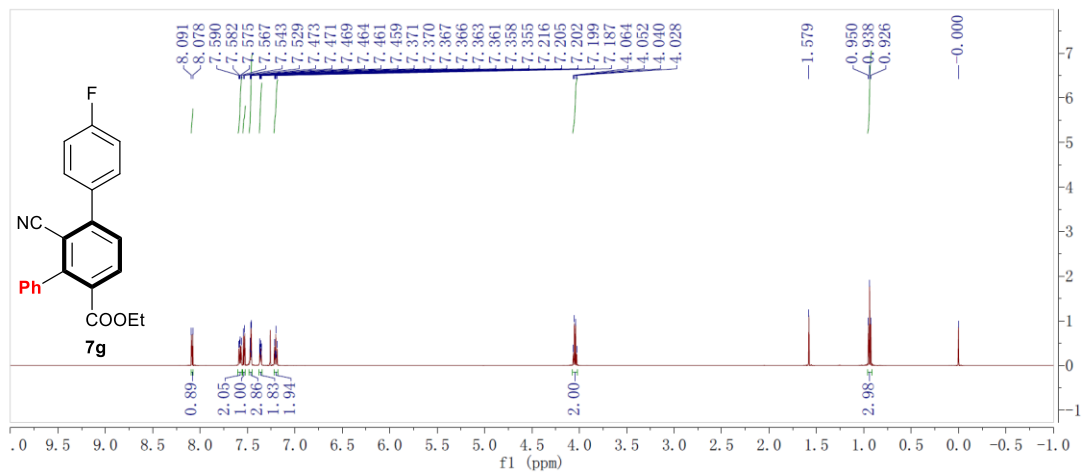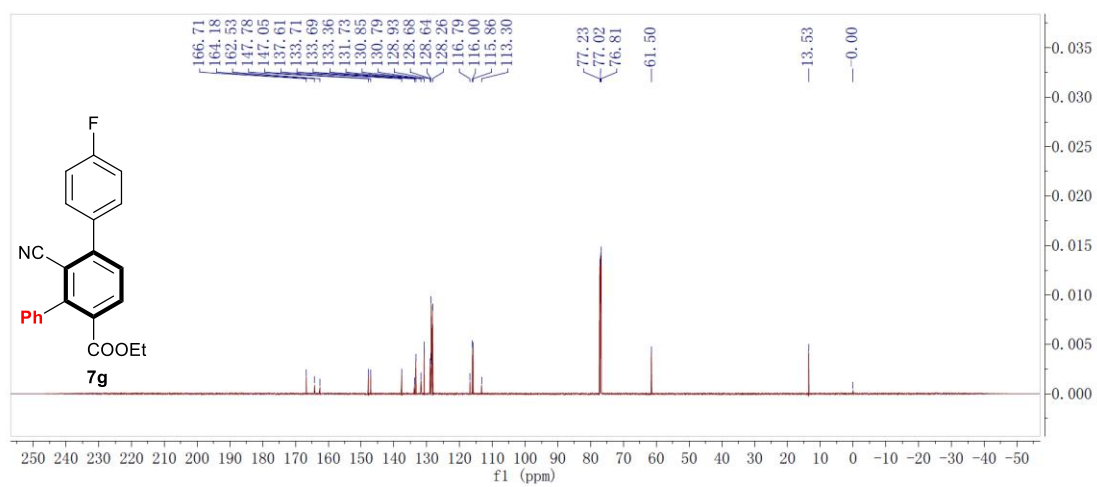

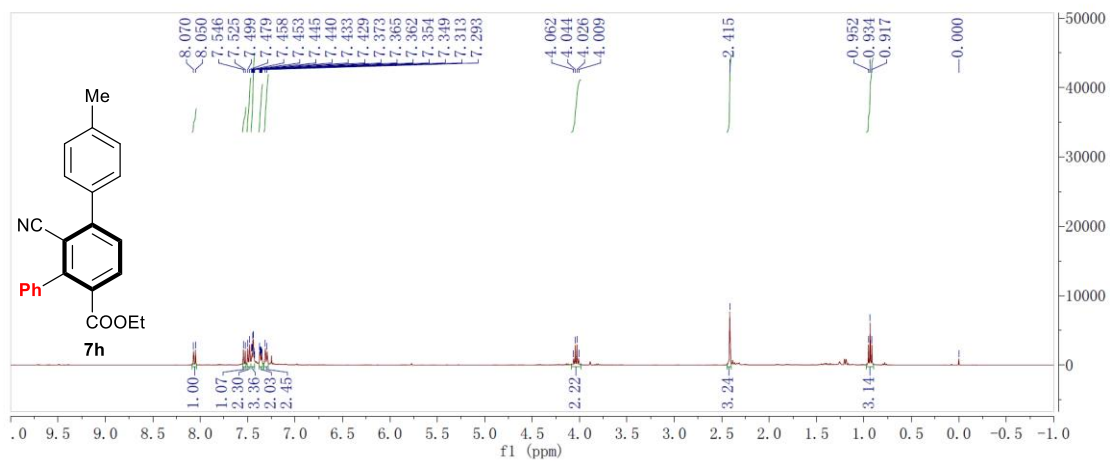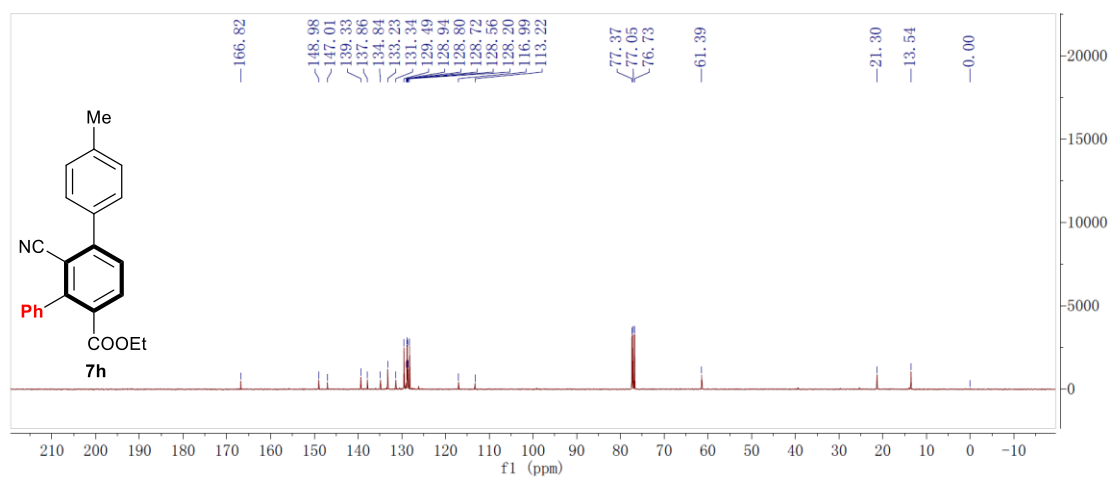

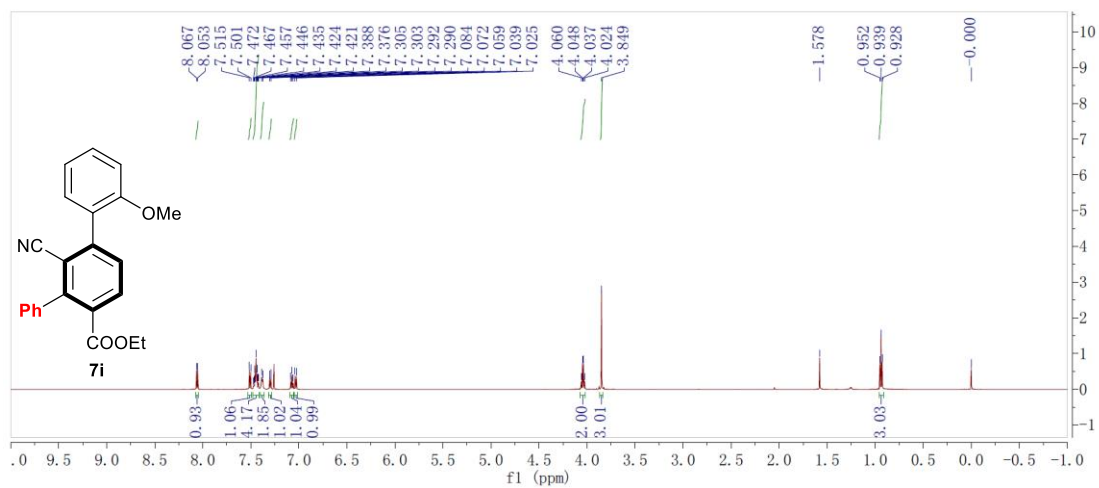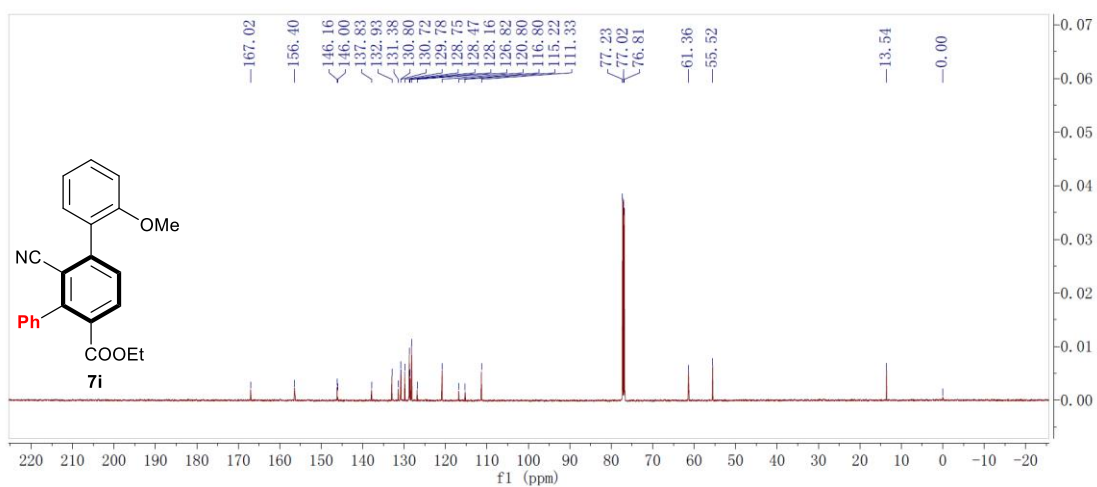

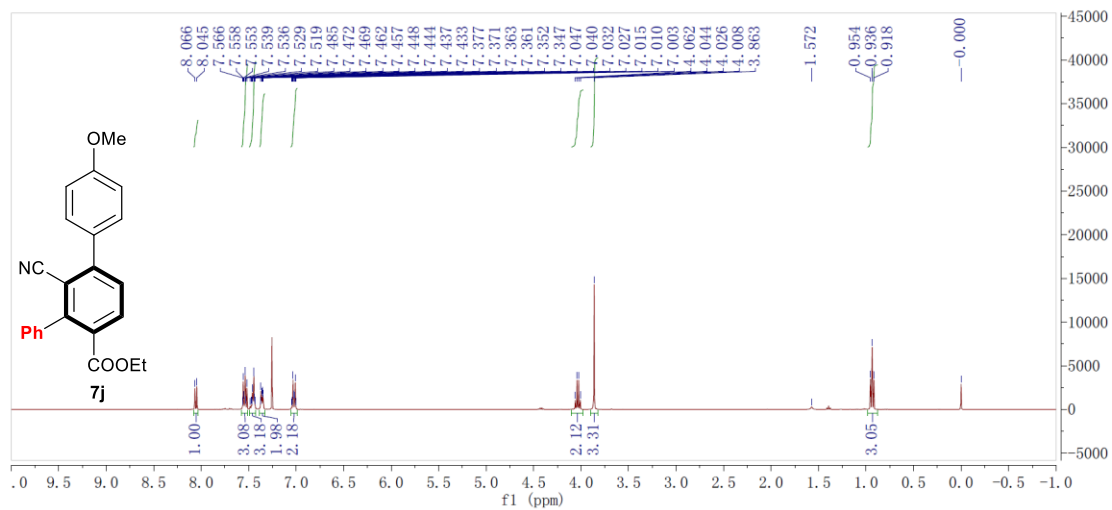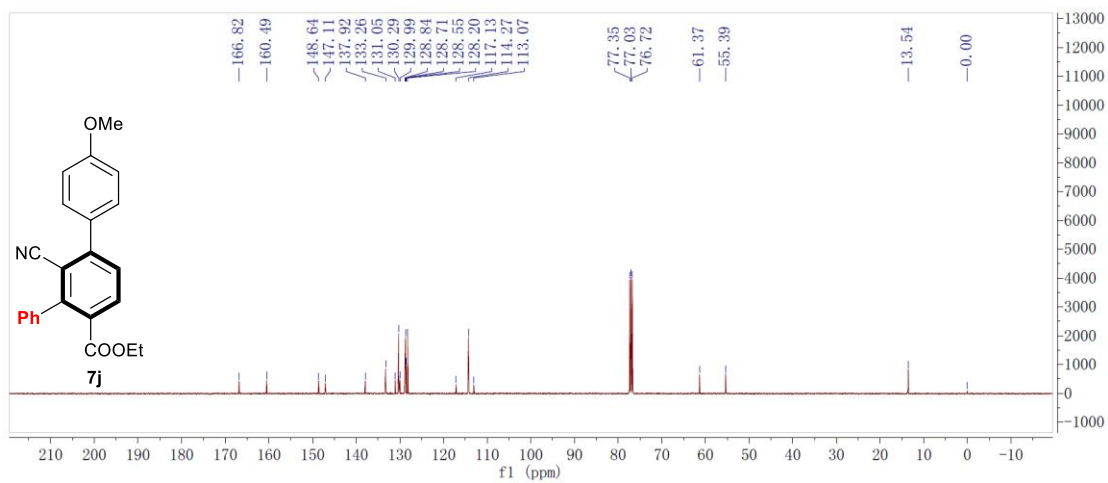



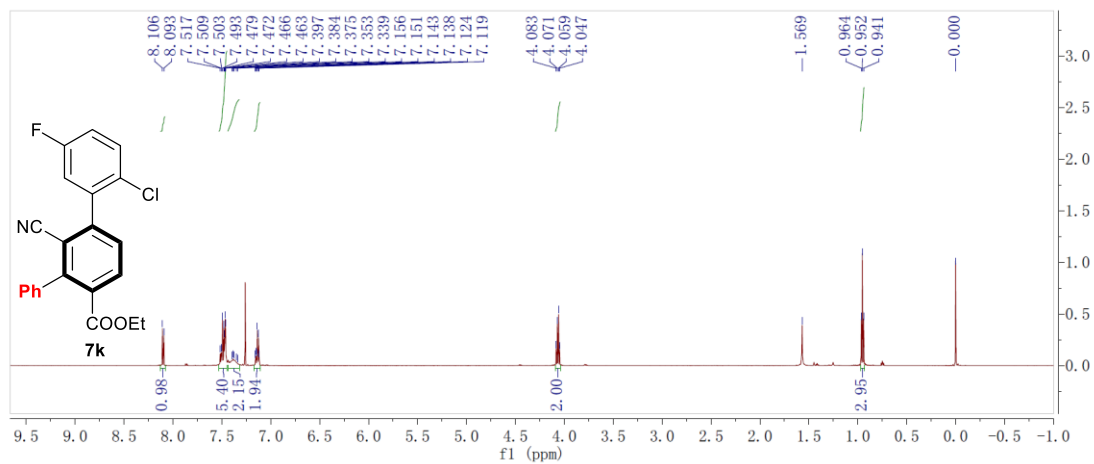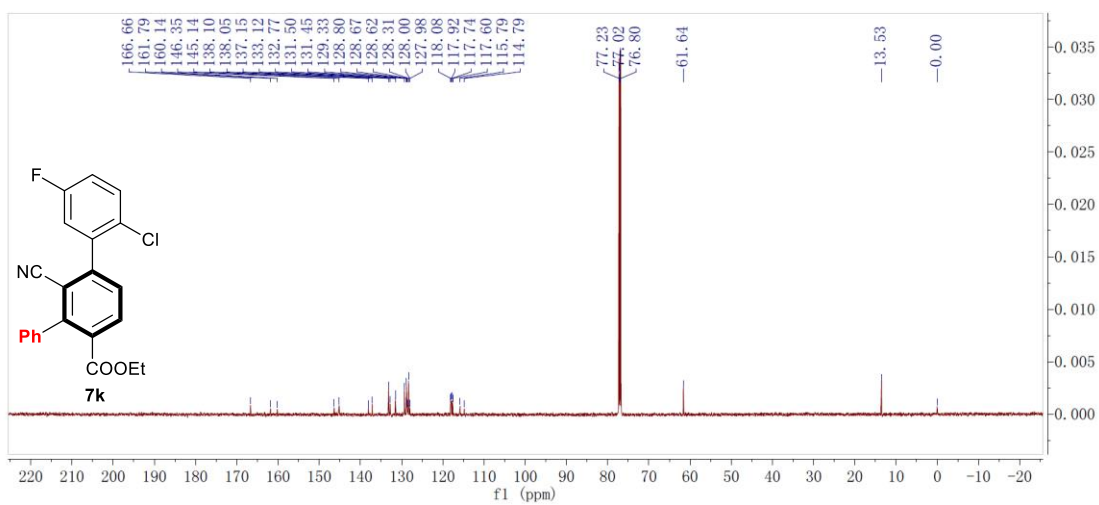

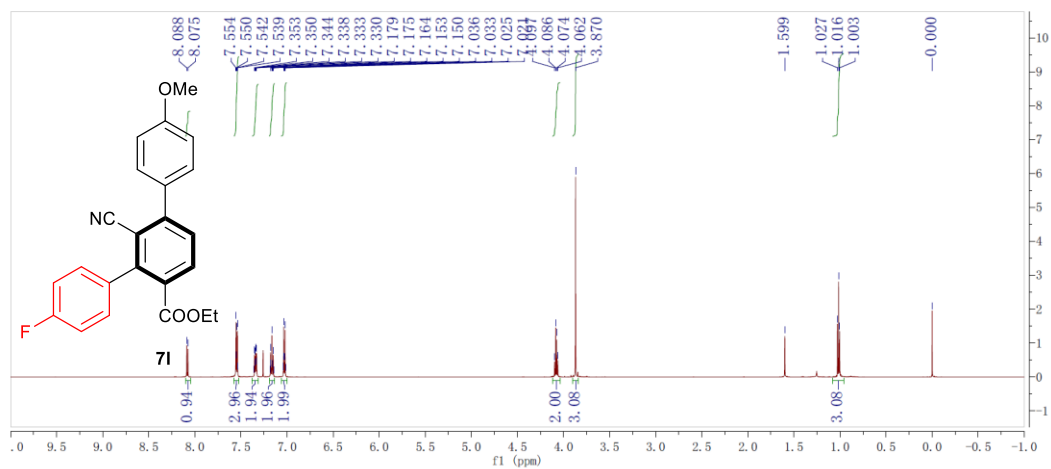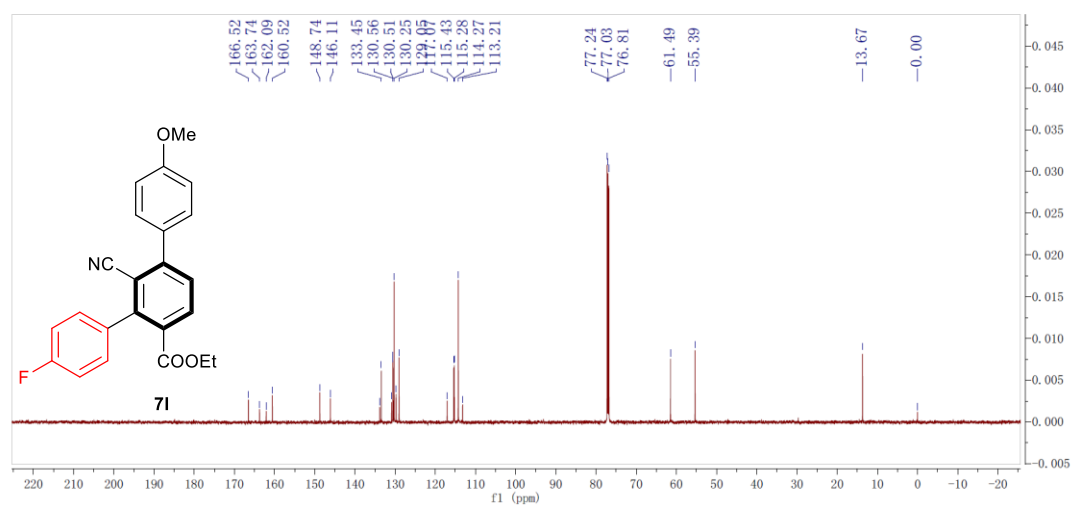

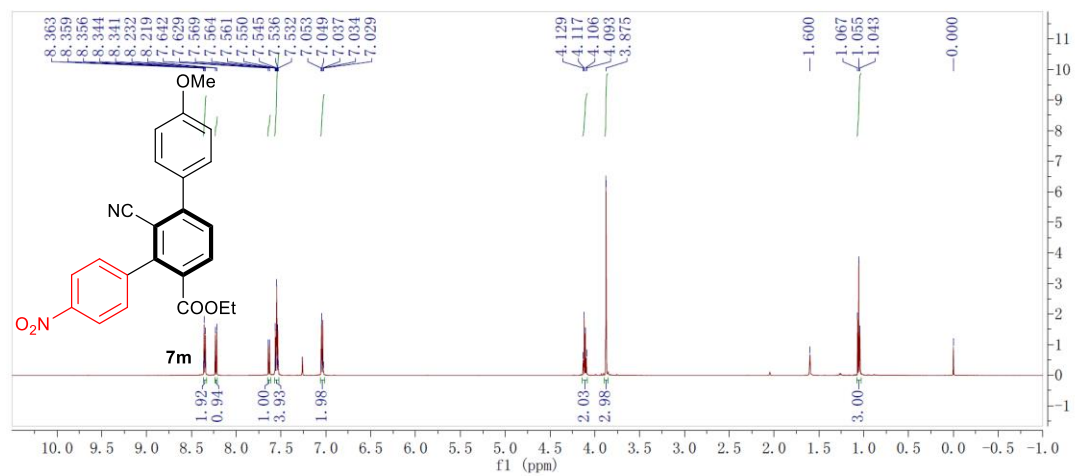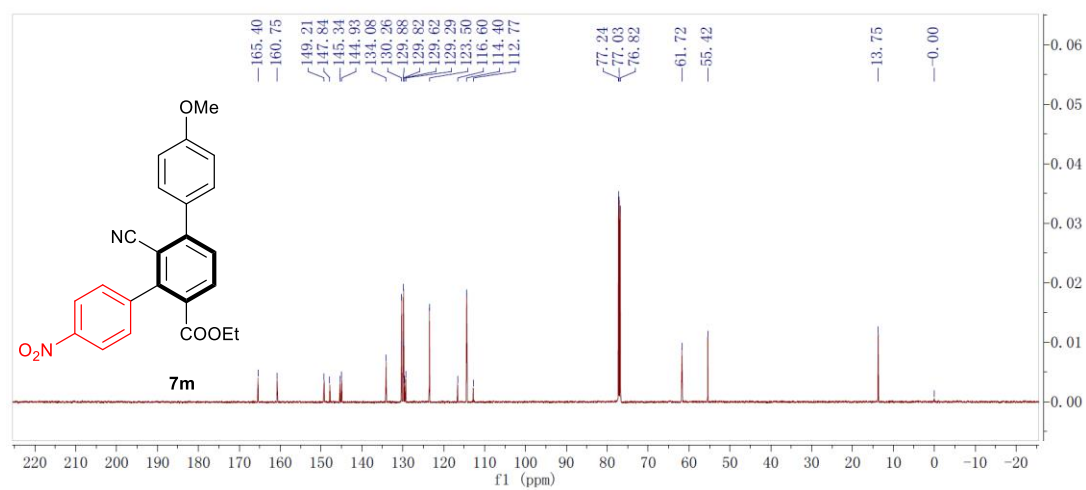

## 8. HRMS spectra

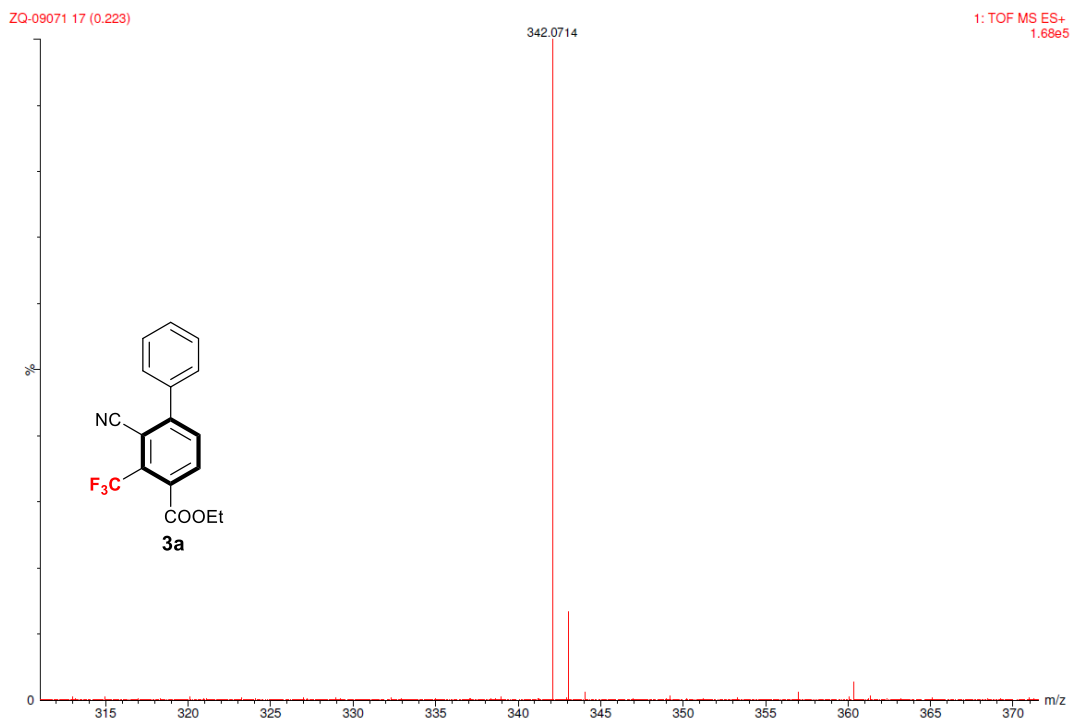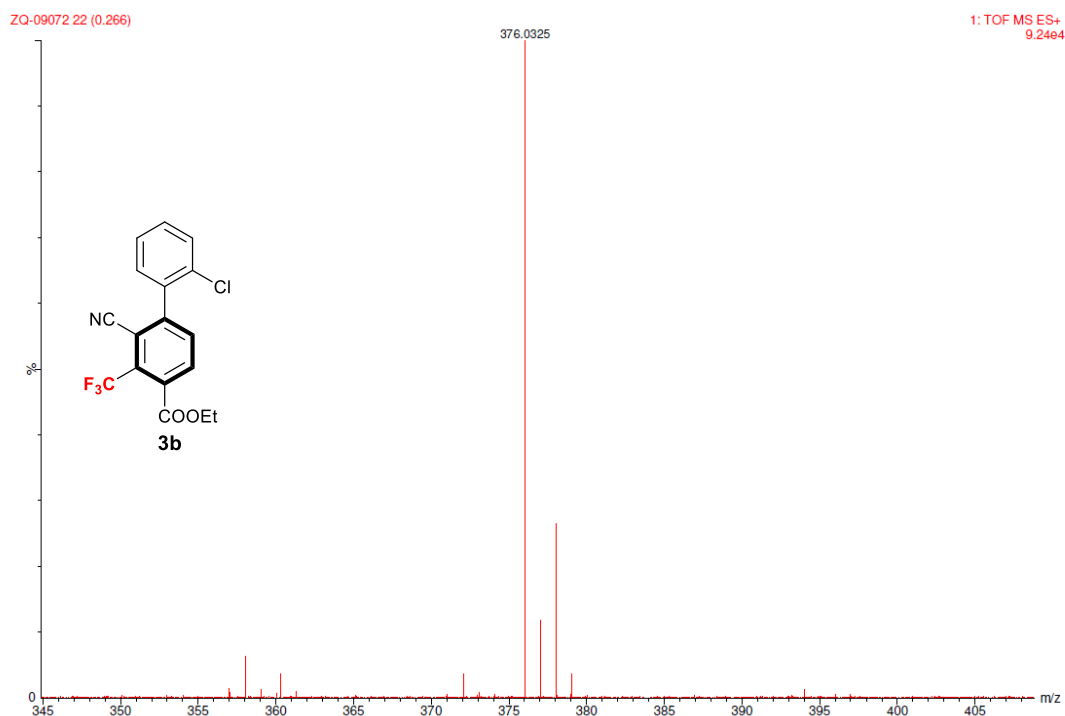

ZQ-09073 21 (0.258)

1: TOF MS ES+  
7.65e3

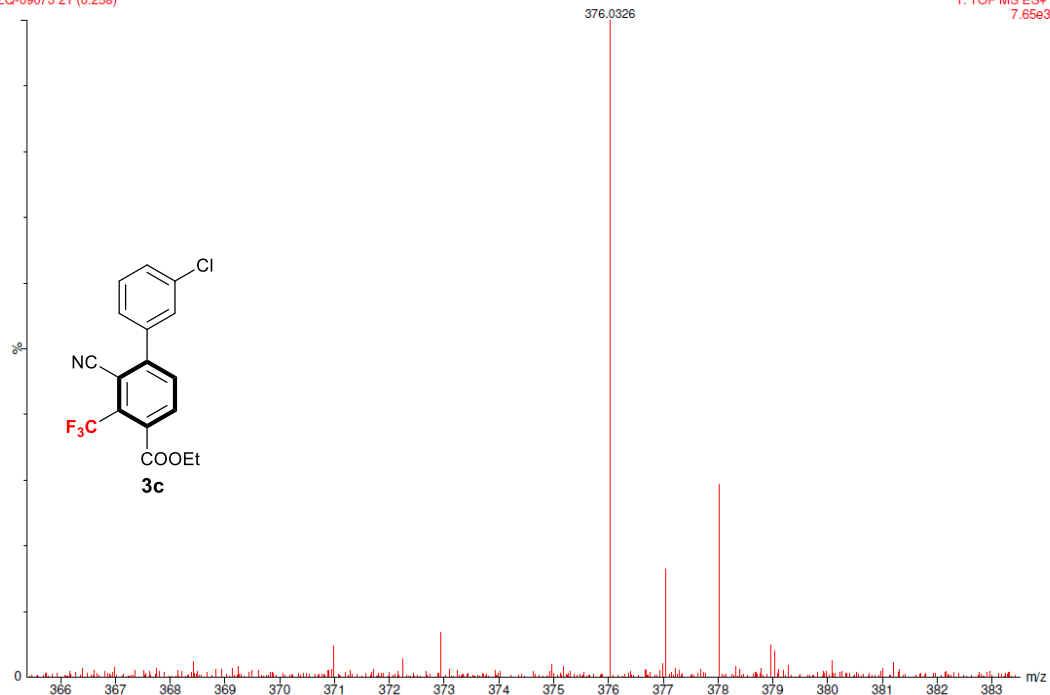

ZQ-09074 16 (0.194)

1: TOF MS ES+  
3.18e4

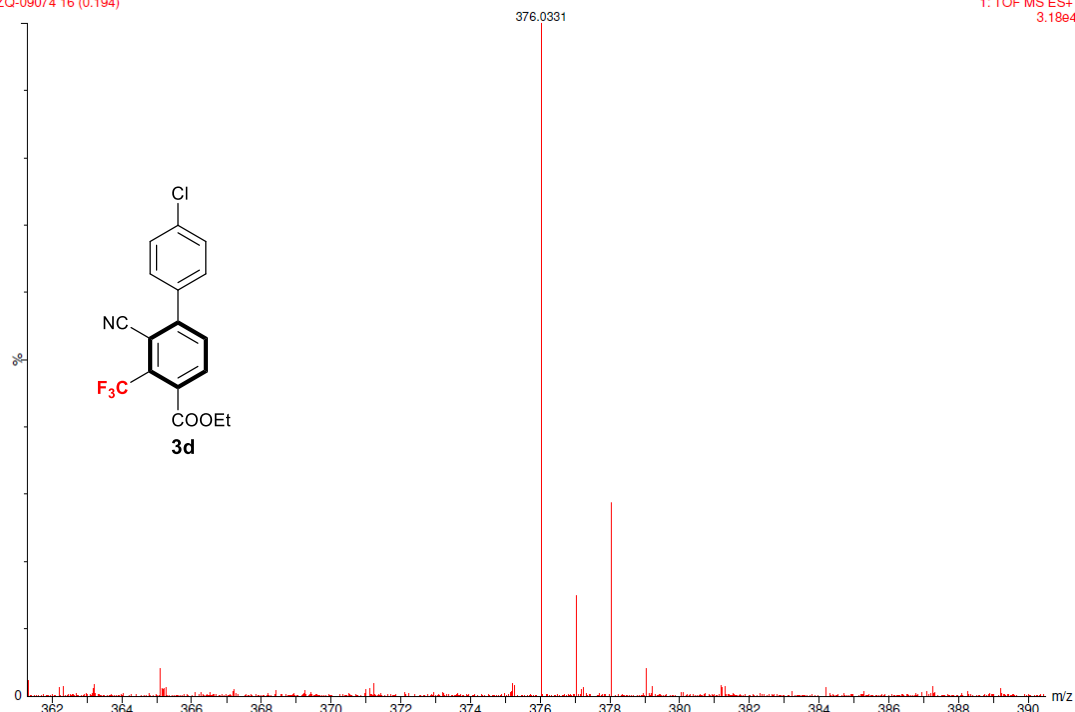

ZQ-09075 18 (0.232)

1: TOF MS ES+  
8.25e4

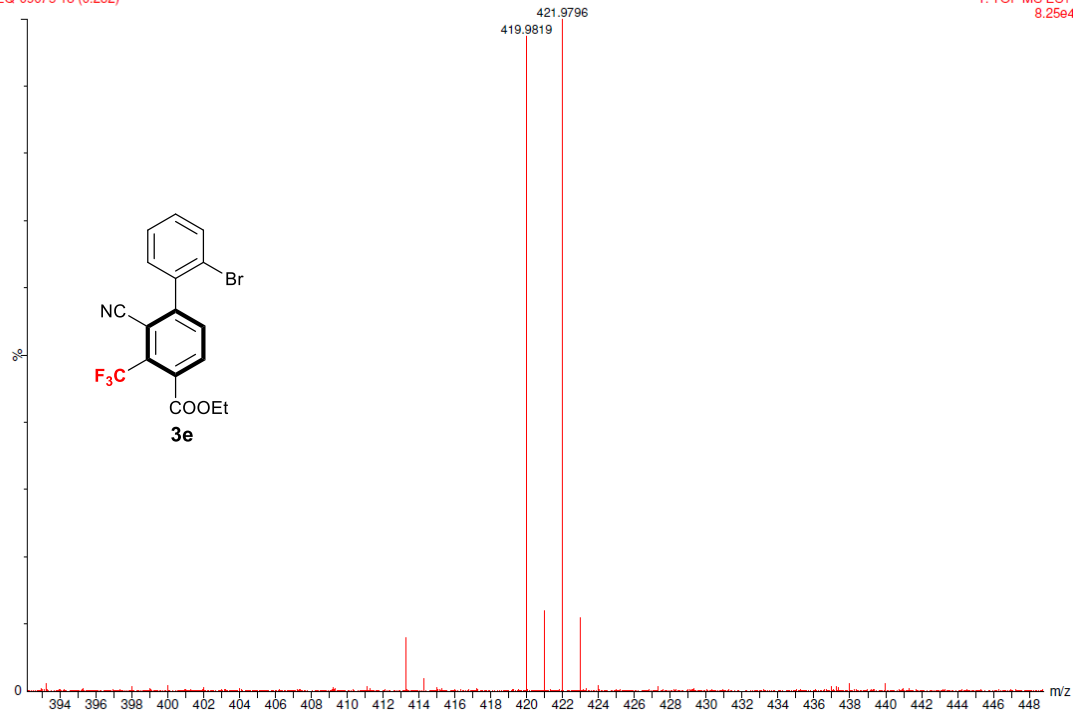

ZQ-09076 17 (0.223)

1: TOF MS ES+  
4.06e4

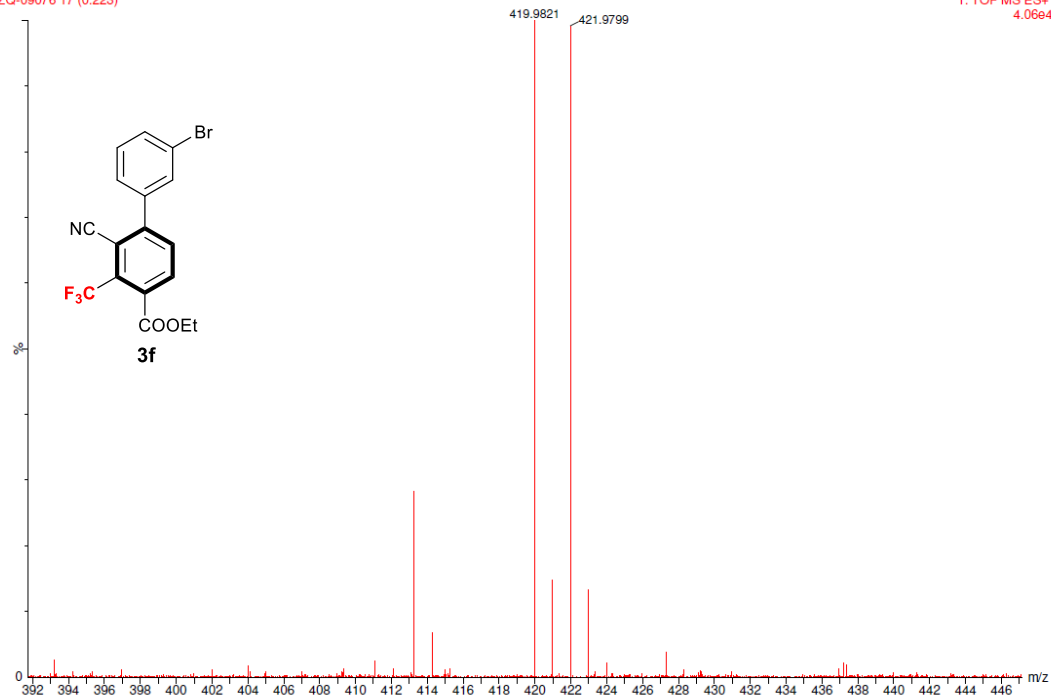

ZQ-09077 19 (0.240)

1: TOF MS ES+  
4.15e3

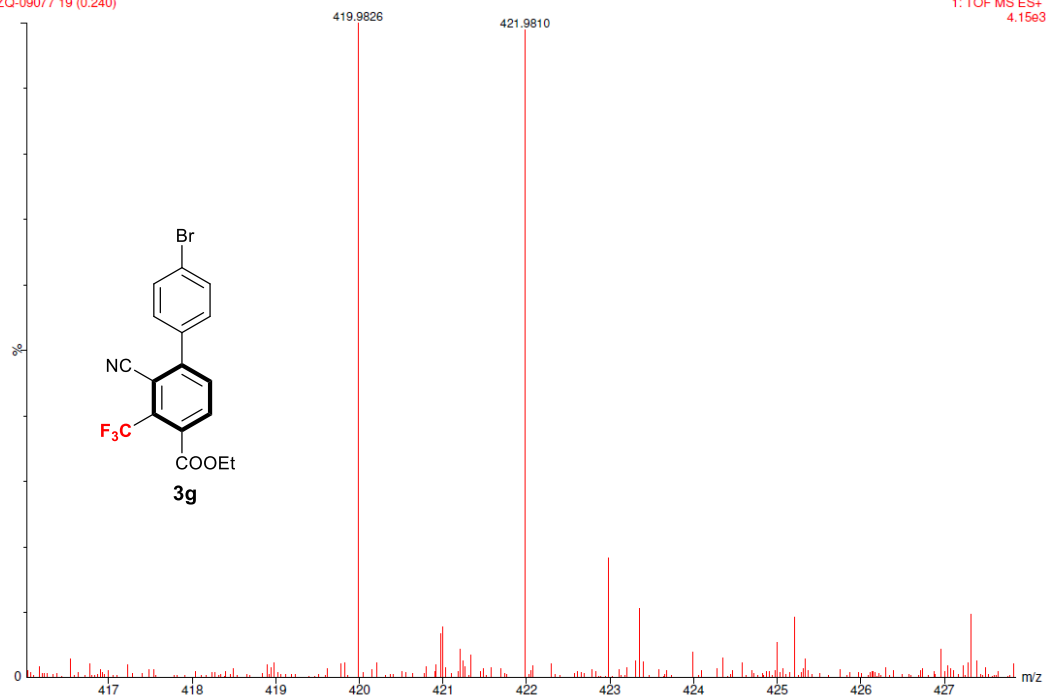

ZQ-09078 17 (0.223)

1: TOF MS ES+  
2.40e5

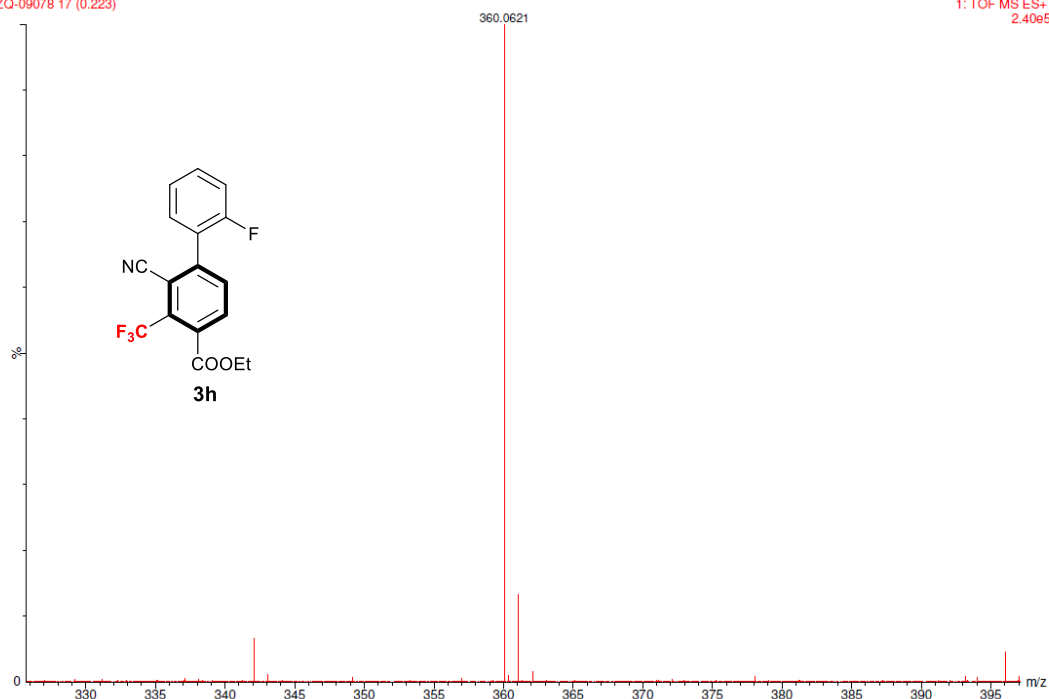

ZQ-09079 12 (0.160)

1: TOF MS ES+  
1.16e4

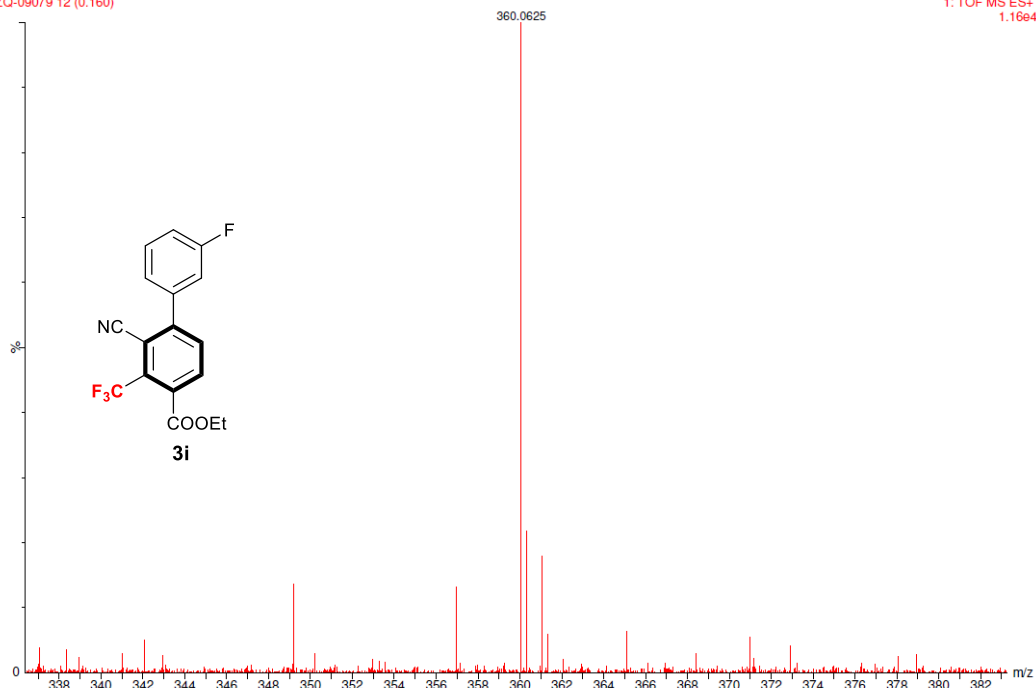

ZQ-090710 16 (0.194)

1: TOF MS ES+  
2.19e4

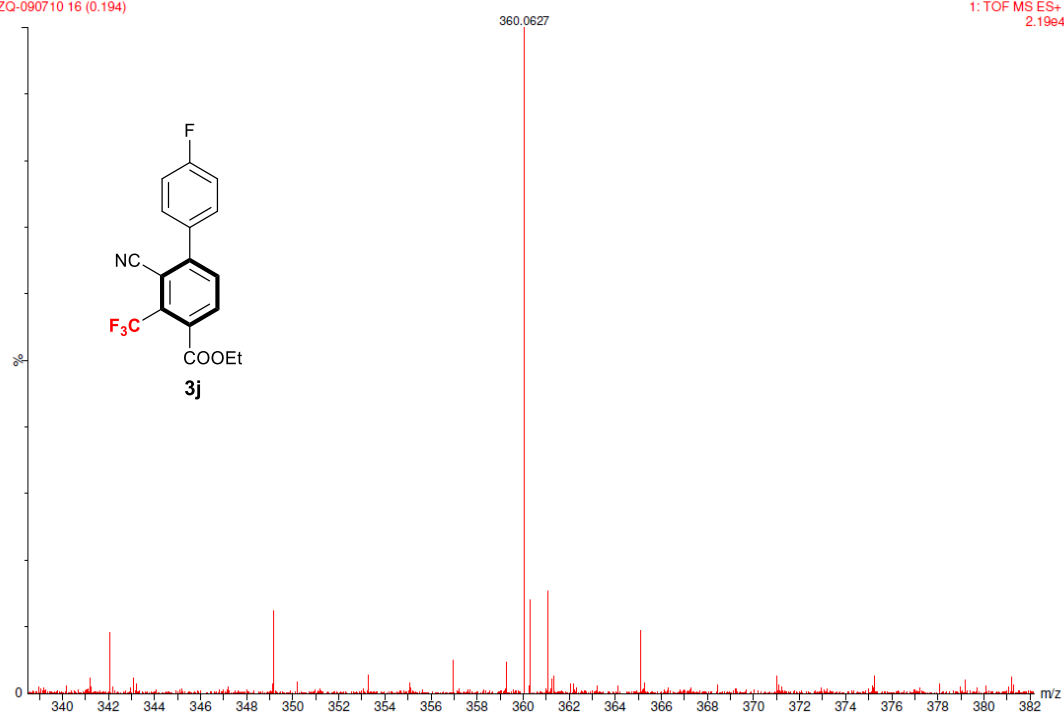



ZQ-090711 21 (0.258)

1: TOF MS ES+  
2.18e4

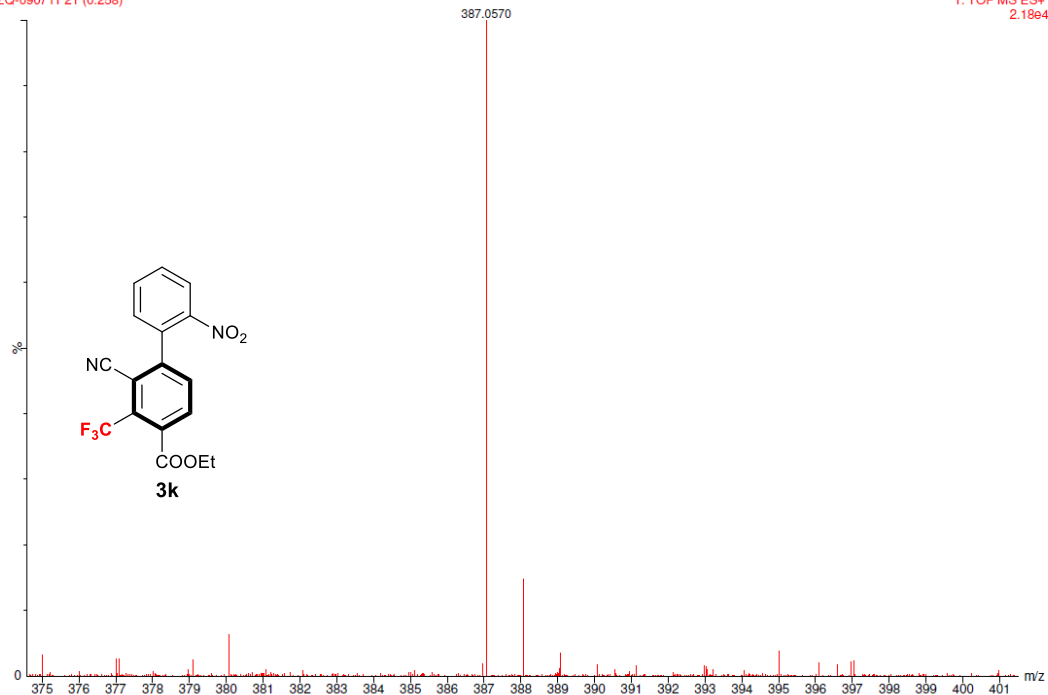

ZQ-090712 12 (0.159)

1: TOF MS ES+  
2.43e3

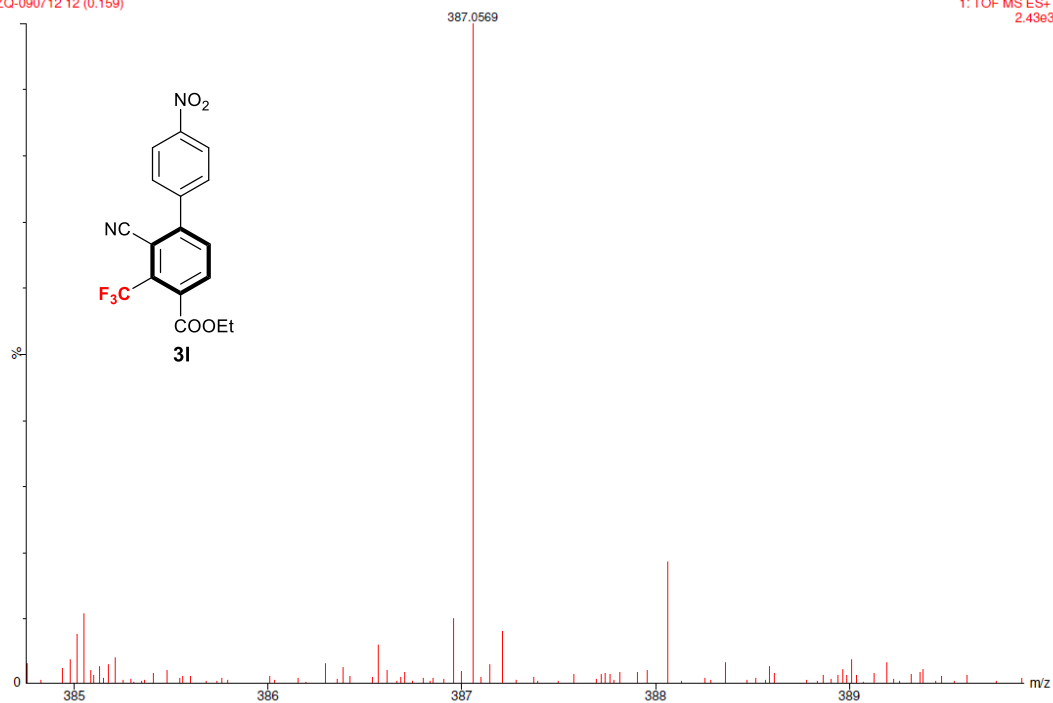

ZQ-090713 17 (0.223)

1: TOF MS ES+  
1.42e5

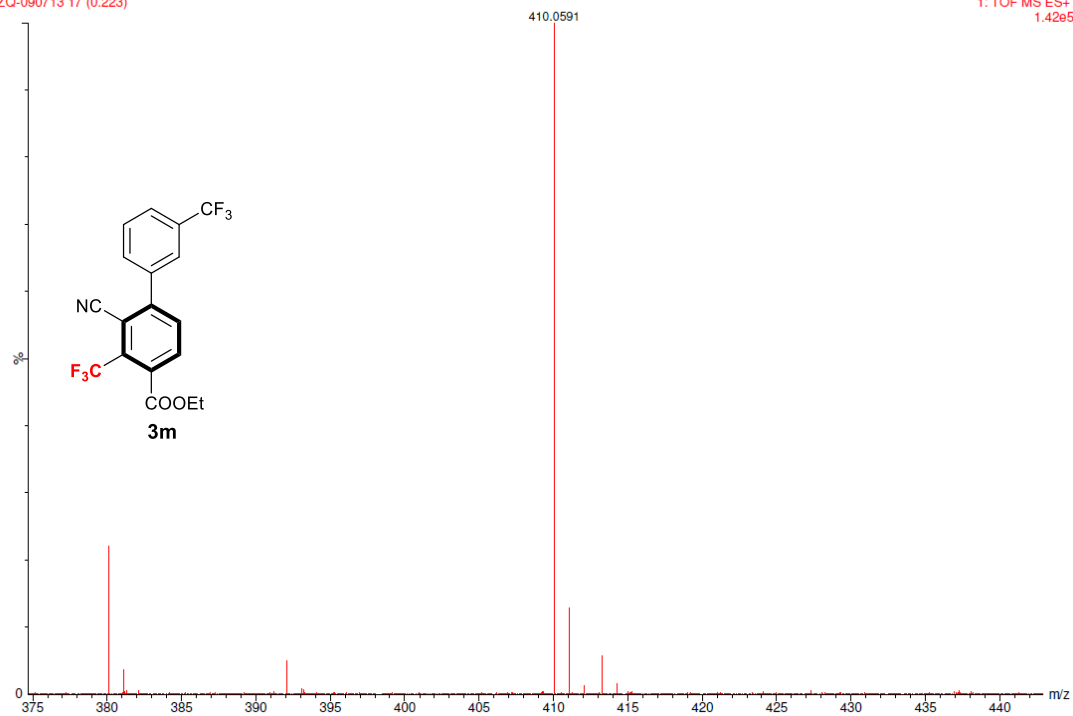

ZQ-090716 16 (0.194)

1: TOF MS ES+  
6.33e5

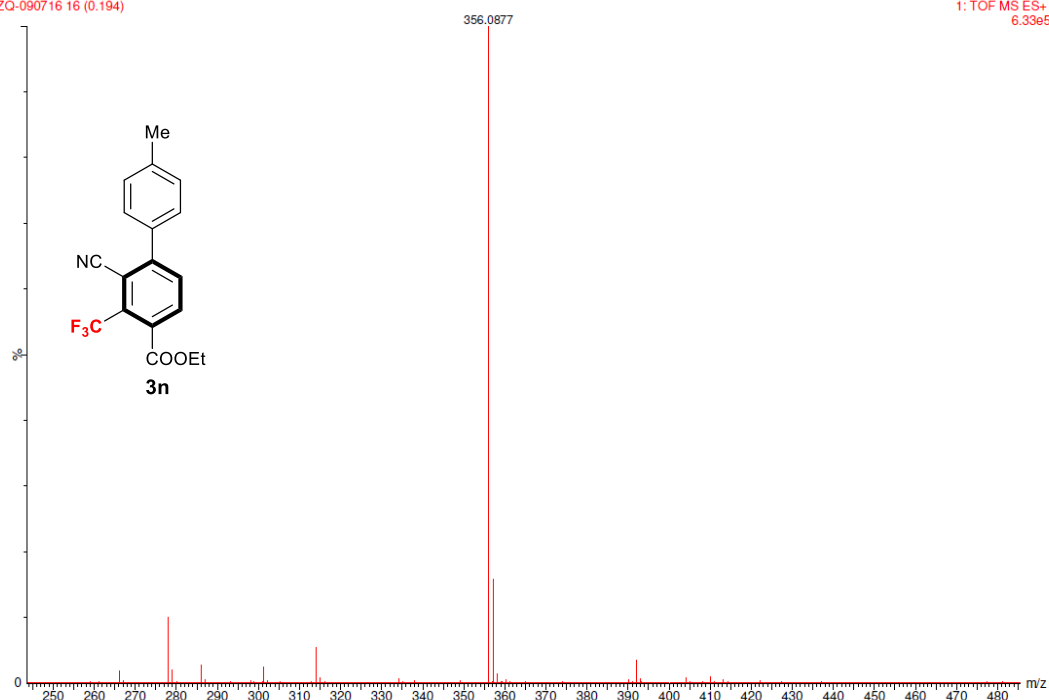

ZQ-090714 14 (0.177)

1: TOF MS ES+  
3.47e5

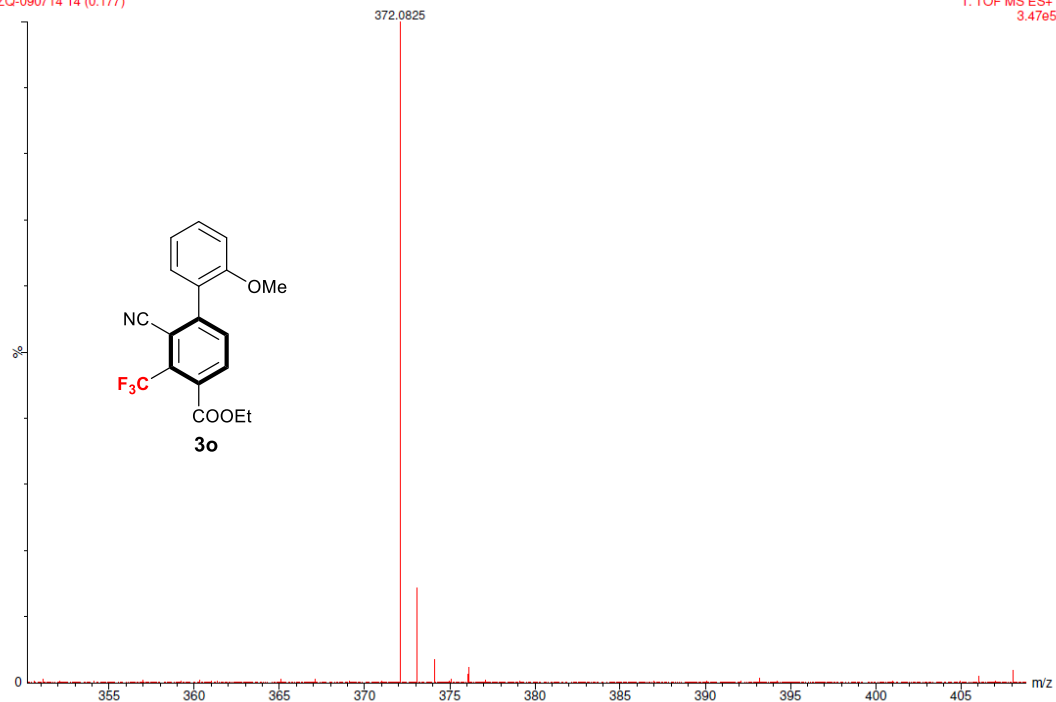

ZQ-090715 26 (0.321)

1: TOF MS ES+  
1.85e5

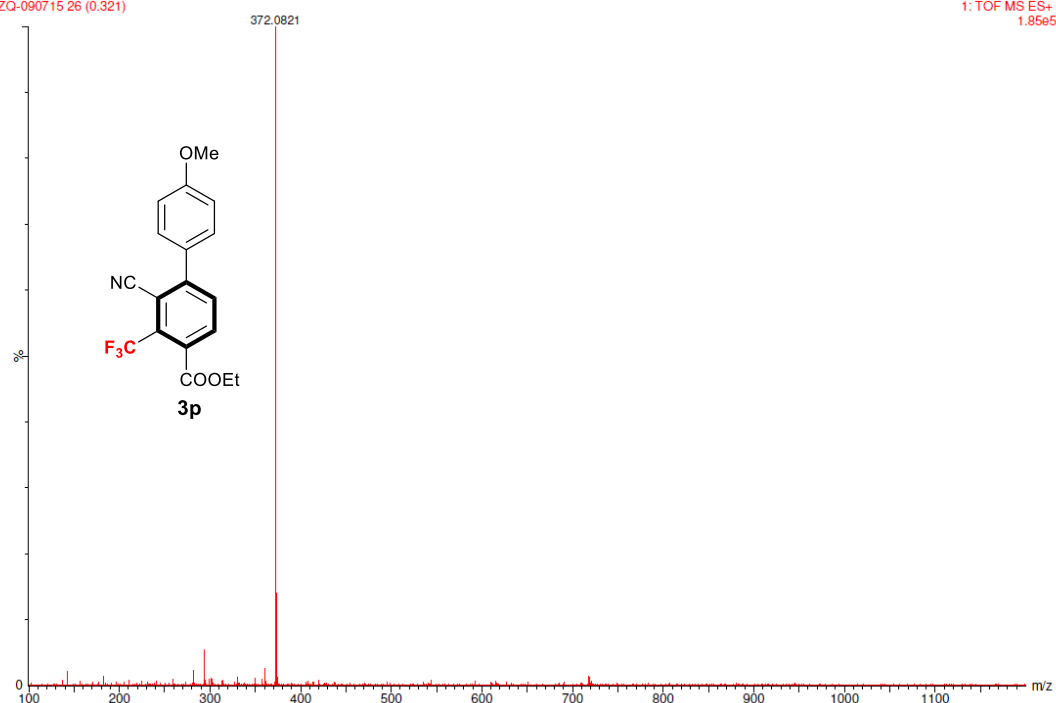

ZQ-090717 14 (0.177)

1: TOF MS ES+  
1.45e4

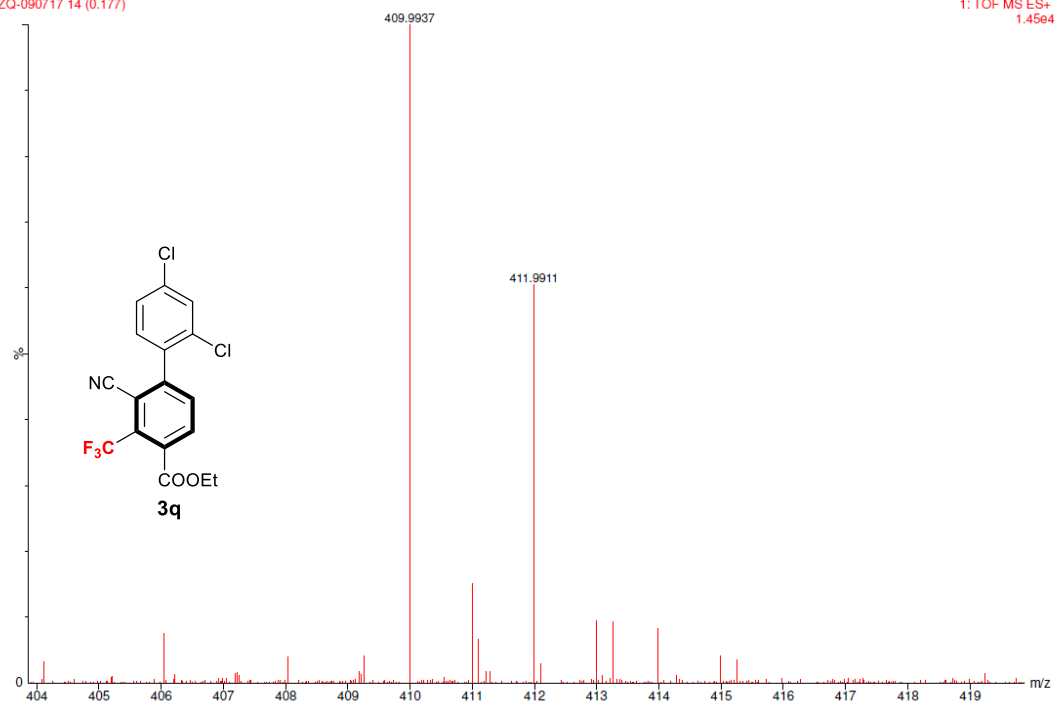

ZQ-090717 16 (0.194)

1: TOF MS ES+  
1.78e4

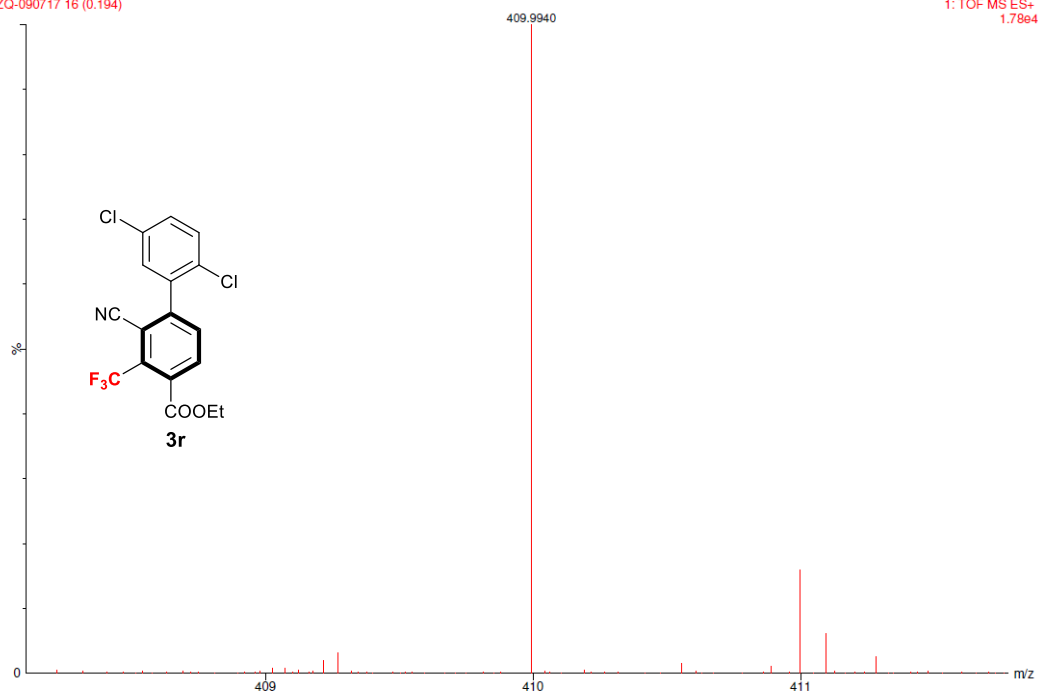

ZQ-090718 22 (0.266)

1: TOF MS ES+  
2.6463

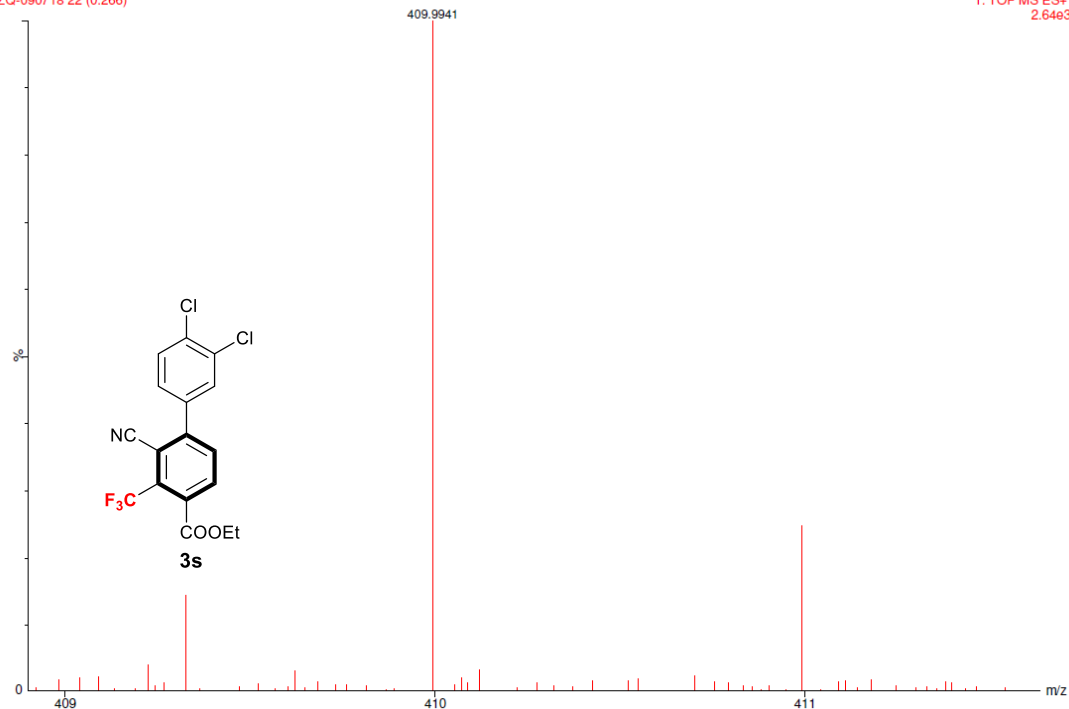

ZQ-090722 15 (0.186)

1: TOF MS ES+  
2.18e4

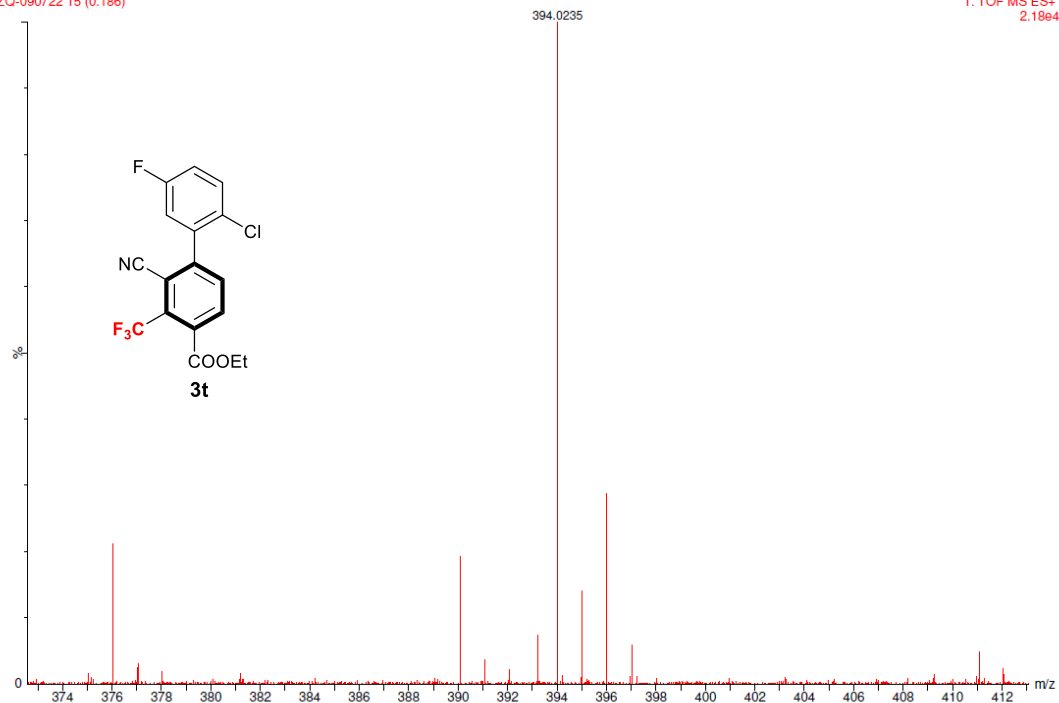

ZQ-090721 15 (0.186)

1: TOF MS ES+  
4.60e4

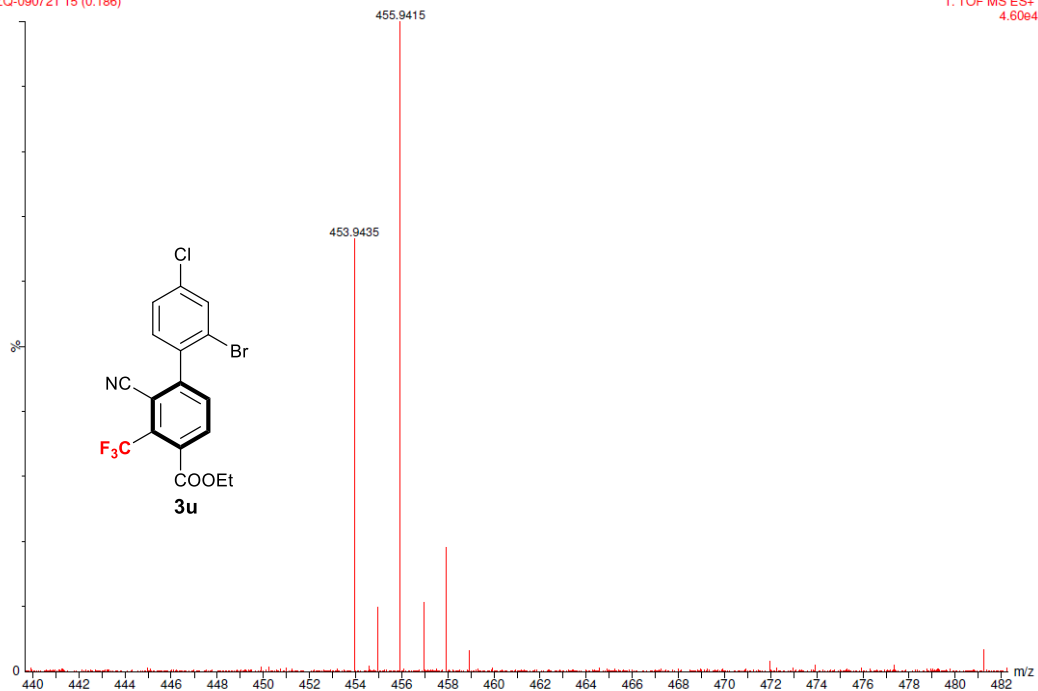

ZQ-090719 14 (0.177)

1: TOF MS ES+  
2.23e4

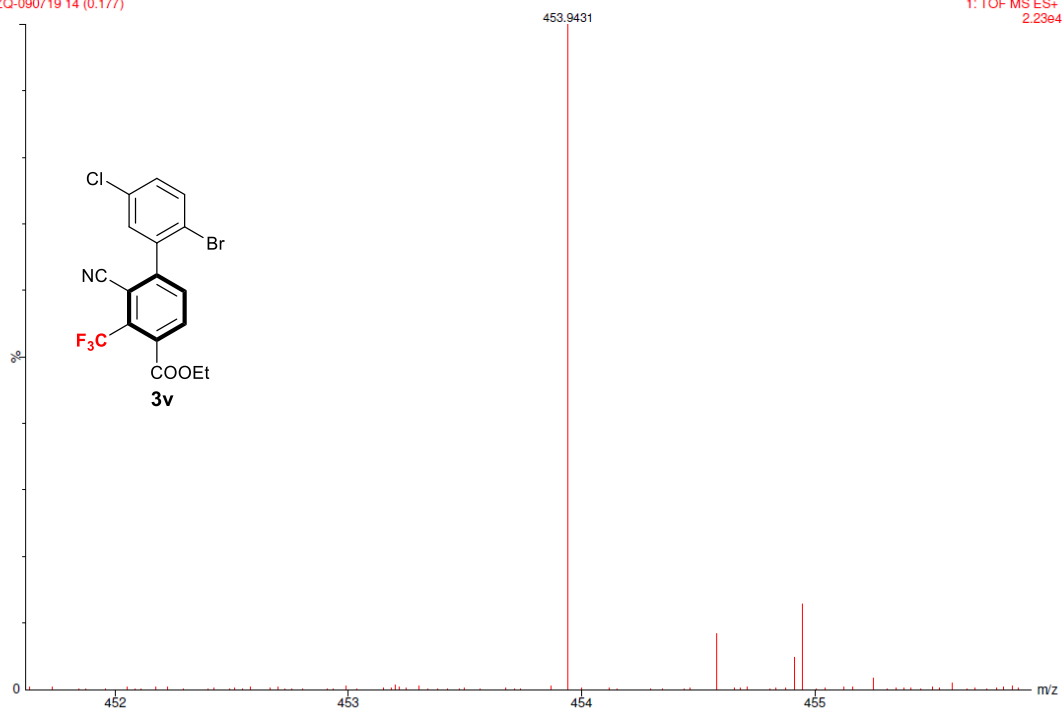

ZQ-090723 17 (0.223)

1: TOF MS ES+  
4.65e3

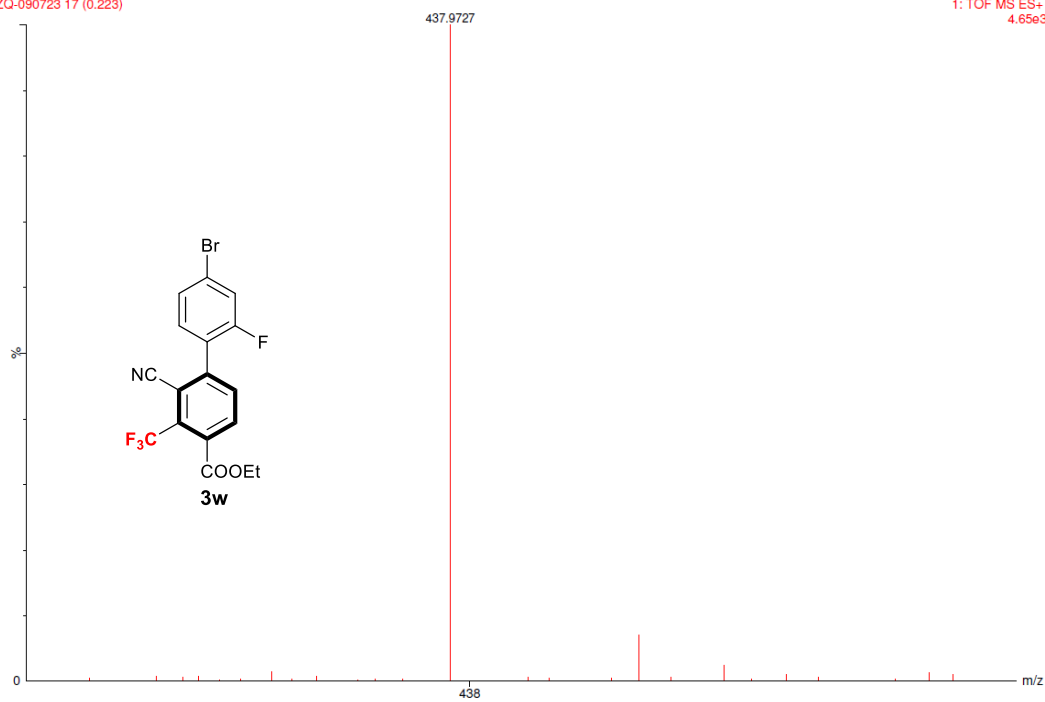

ZQ-090724 25 (0.312)

1: TOF MS ES+  
1.18e3

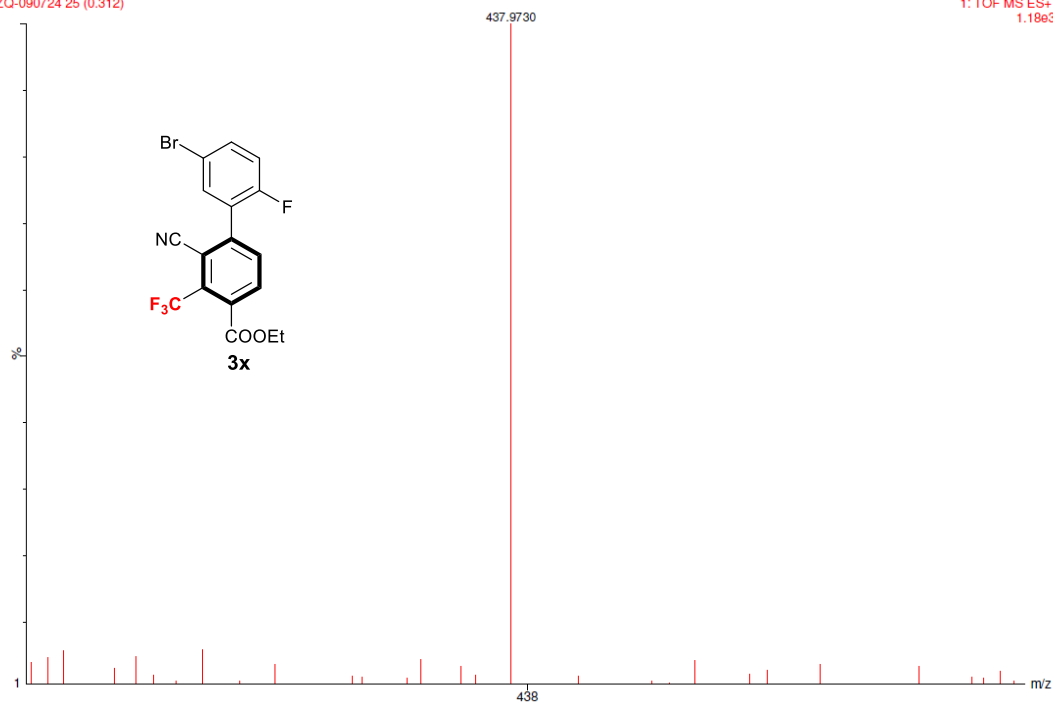

ZQ-01201 8 (0.211)

1: TOF MS ES+  
9.44e5

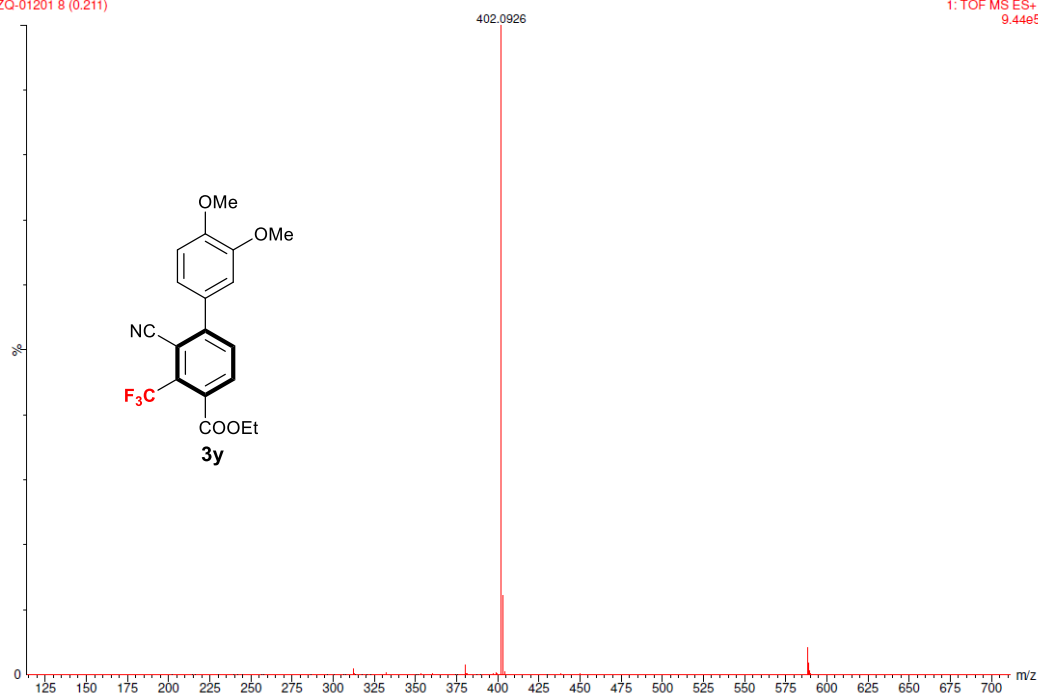

| Name           | JYL-10062   | Rack Pos.    | Instrument | Instrument 1 | Operator                         |
|----------------|-------------|--------------|------------|--------------|----------------------------------|
| Inj. Vol. (ul) | 10          | Plate Pos.   | IRM Status | Success      |                                  |
| Data File      | JYL-10062.d | Method (Acq) | TOF.m      |              | Acq. Time (Local)                |
|                |             |              |            |              | 10/6/2019 5:20:44 PM (UTC+08:00) |

+ESI Scan (rt: 0.704 min) Frag=175.0V JYL-10062.d

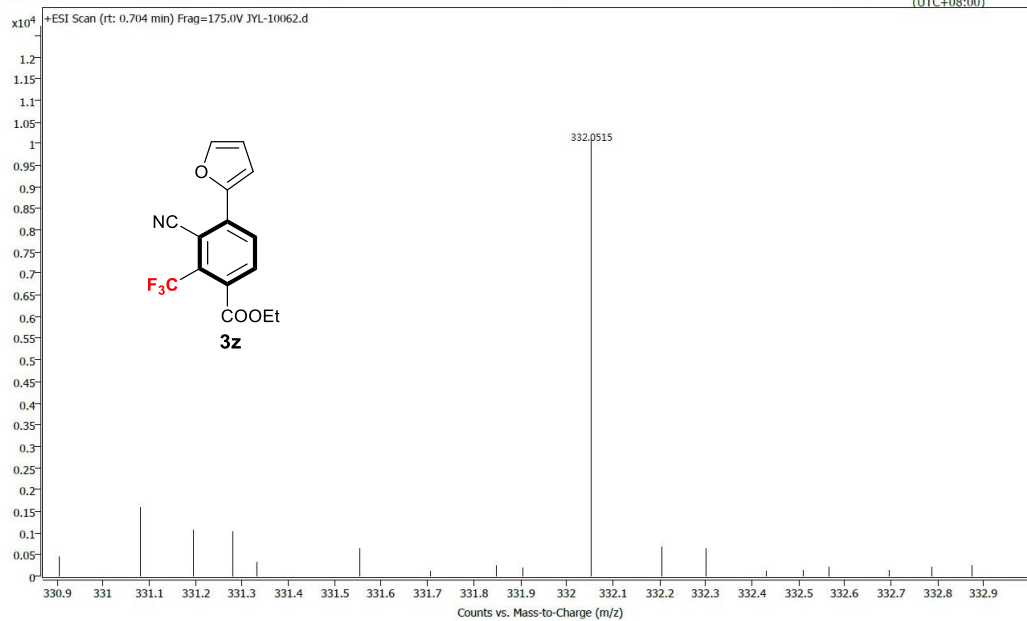



ZQ-090725 35 (0.419)

1: TOF MS ES+  
6.76e4

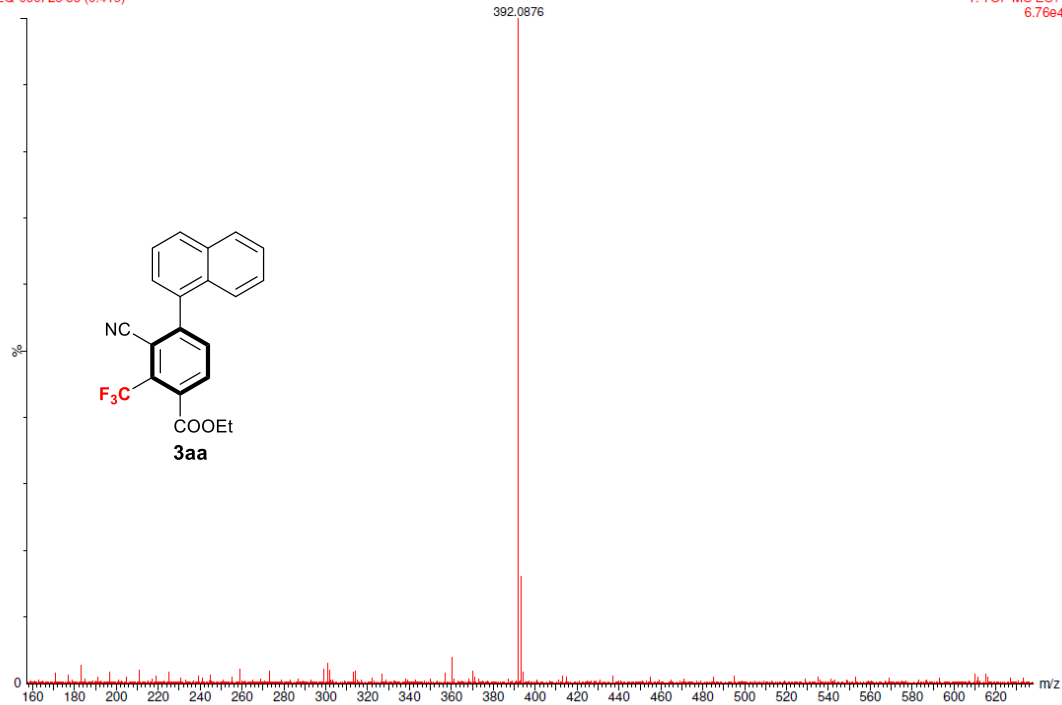

ZQ-090726 23 (0.275)

1: TOF MS ES+  
5.85e4

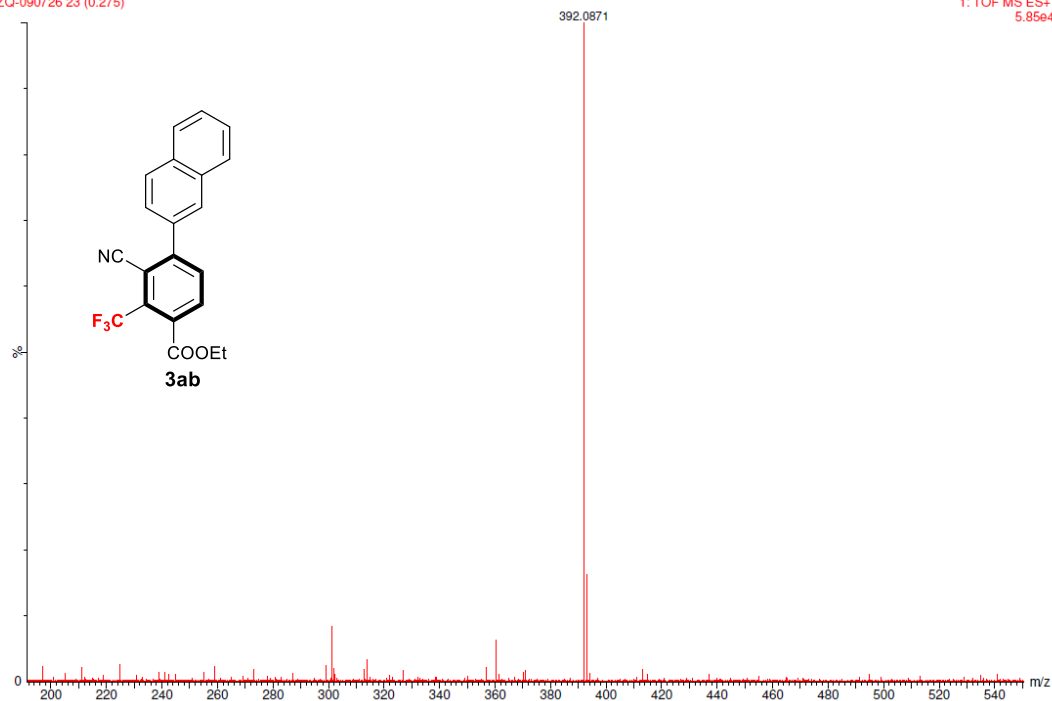

ZQ-01202 7 (0.194)

1: TOF MS ES+  
9.85e5

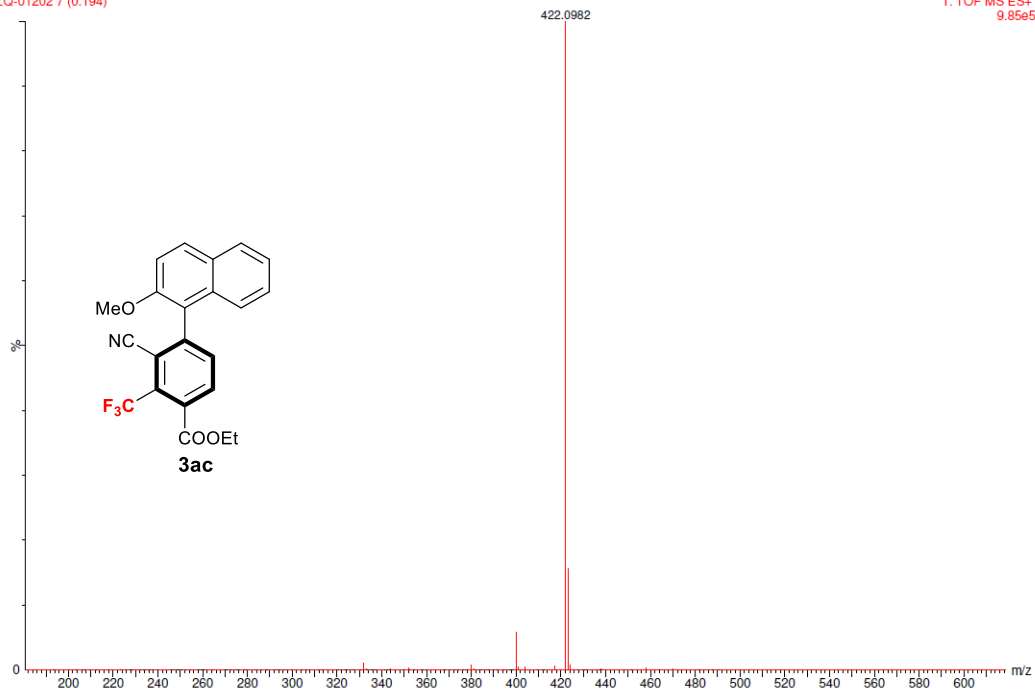

A 8 (0.211)

1: TOF MS ES+  
2.94e4

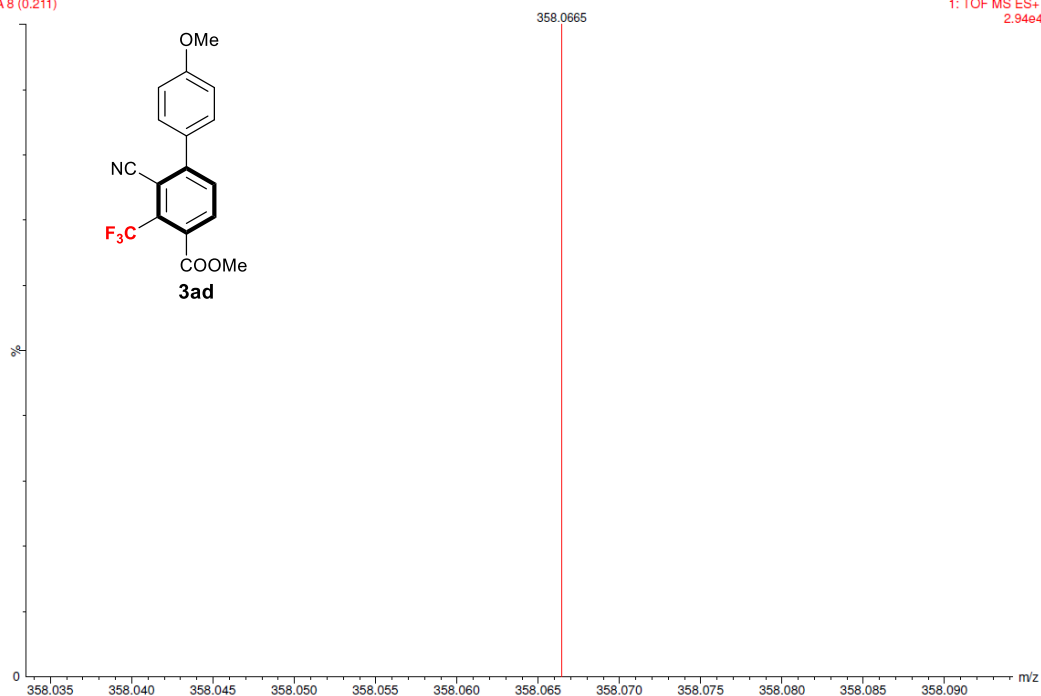

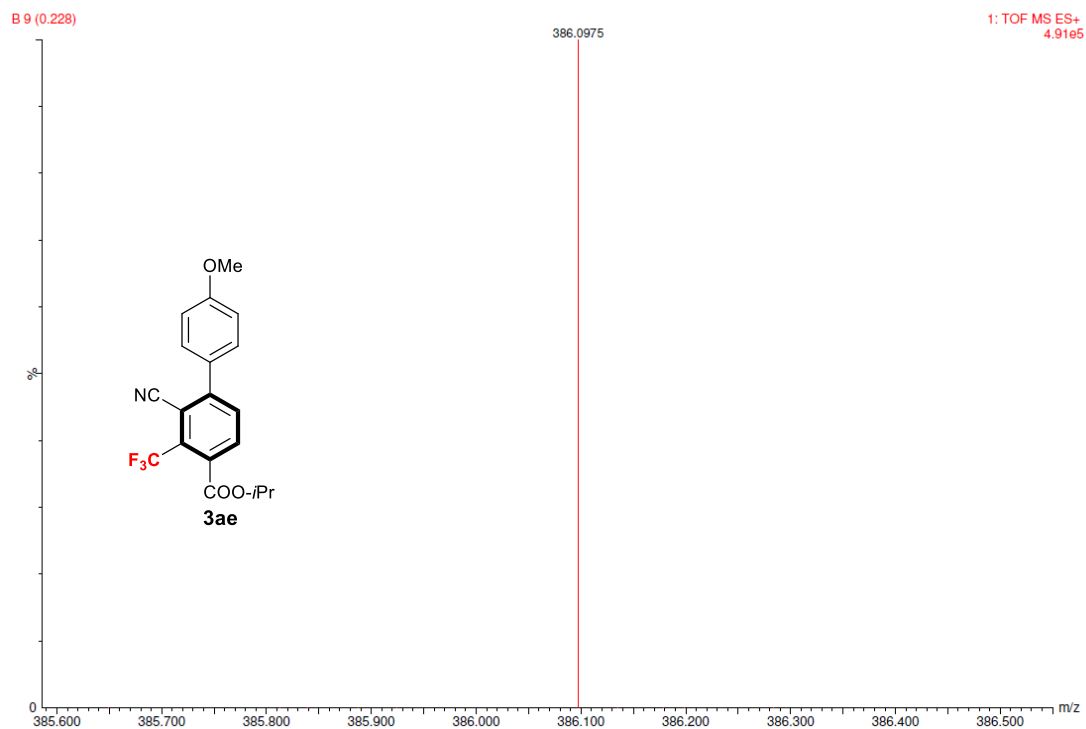

| Name           | ZQ-1006-F   | Rack Pos.    | Instrument | Instrument 1 | Operator                          |
|----------------|-------------|--------------|------------|--------------|-----------------------------------|
| Inj. Vol. (ul) | 10          | Plate Pos.   | IRM Status | Success      |                                   |
| Data File      | ZQ-1006-F.d | Method (Acq) | TOF.m      |              | Acq. Time (Local)                 |
|                |             |              |            |              | 10/6/2019 12:04:15 PM (UTC+08:00) |

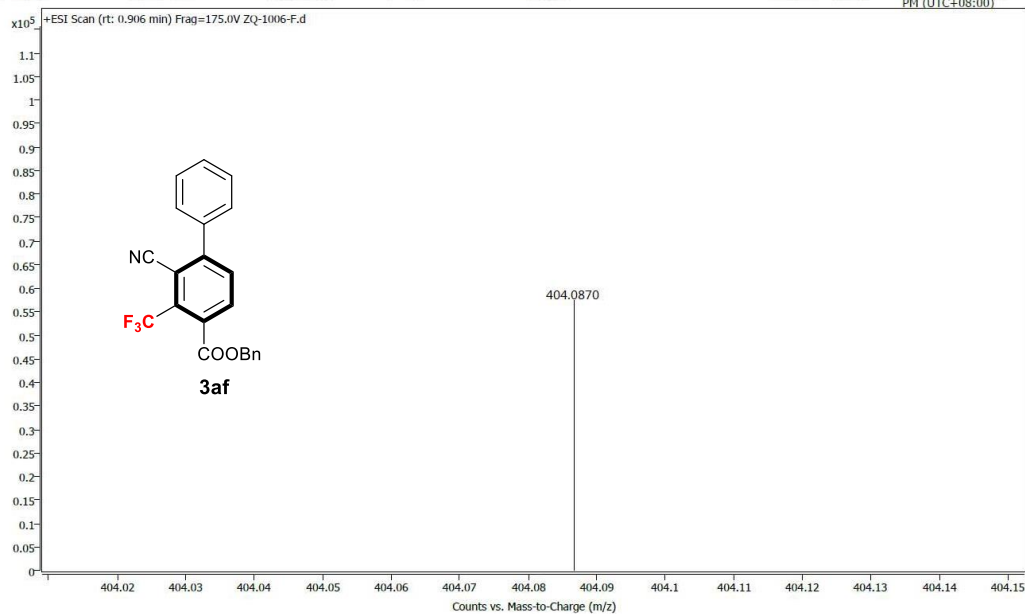

| Name           | ZQ-1006-G   | Rack Pos.    | Instrument | Instrument 1 | Operator                         |
|----------------|-------------|--------------|------------|--------------|----------------------------------|
| Inj. Vol. (ul) | 10          | Plate Pos.   | IRM Status | Success      |                                  |
| Data File      | ZQ-1006-G.d | Method (Acq) | TOF.m      |              | Acq. Time (Local)                |
|                |             |              |            |              | 10/6/2019 5:09:36 PM (UTC+08:00) |

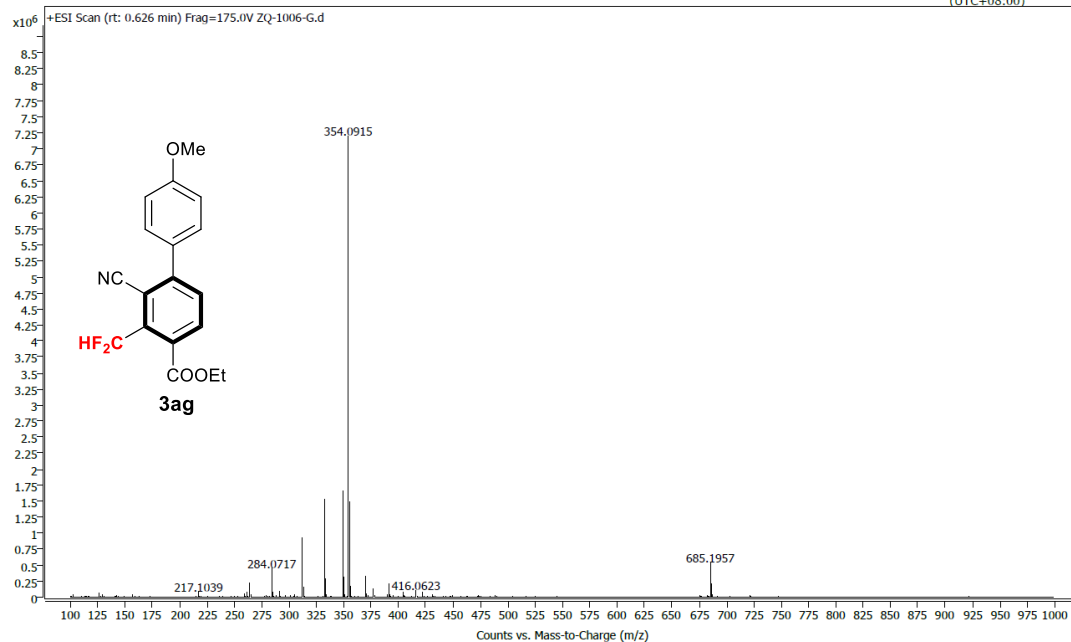

| Name           | ZQ-1006-H   | Rack Pos.    | Instrument | Instrument 1 | Operator                          |
|----------------|-------------|--------------|------------|--------------|-----------------------------------|
| Inj. Vol. (ul) | 10          | Plate Pos.   | IRM Status | Success      |                                   |
| Data File      | ZQ-1006-H.d | Method (Acq) | TOF.m      |              | Acq. Time (Local)                 |
|                |             |              |            |              | 10/6/2019 12:07:14 PM (UTC+08:00) |

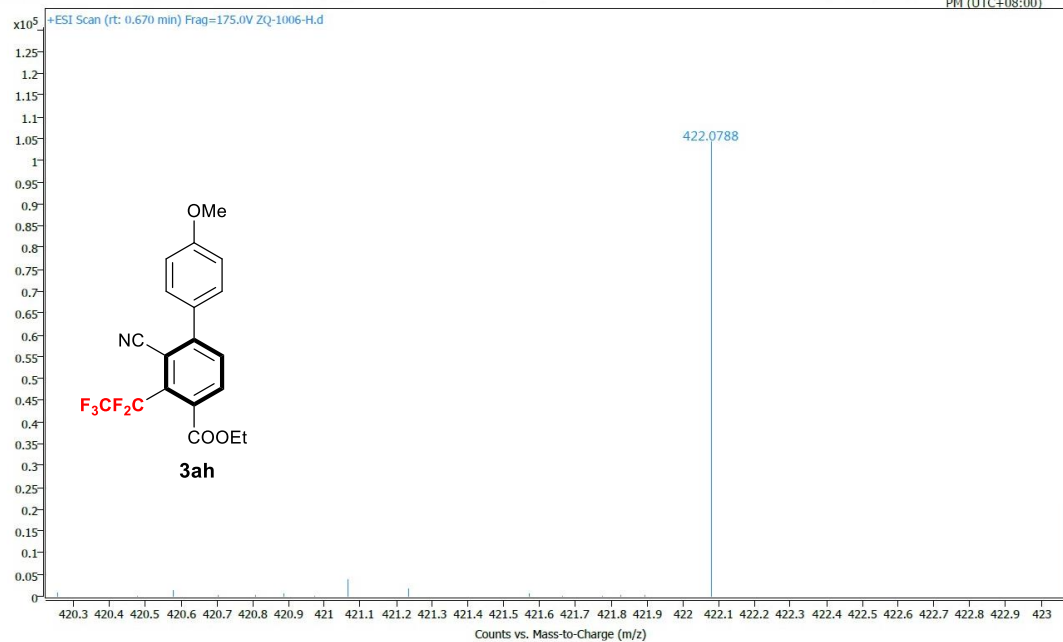

ZQ-02191 7 (0.194)

1: TOF MS ES+  
5.08e5

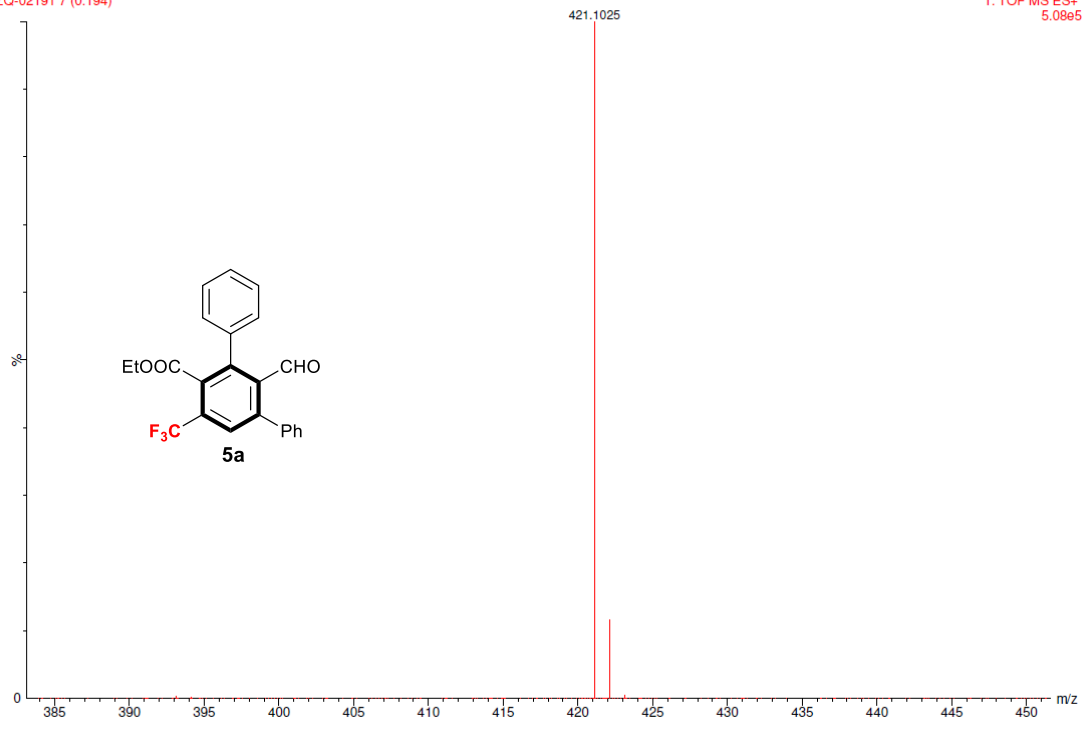

ZQ-02198 7 (0.194)

1: TOF MS ES+  
7.19e4

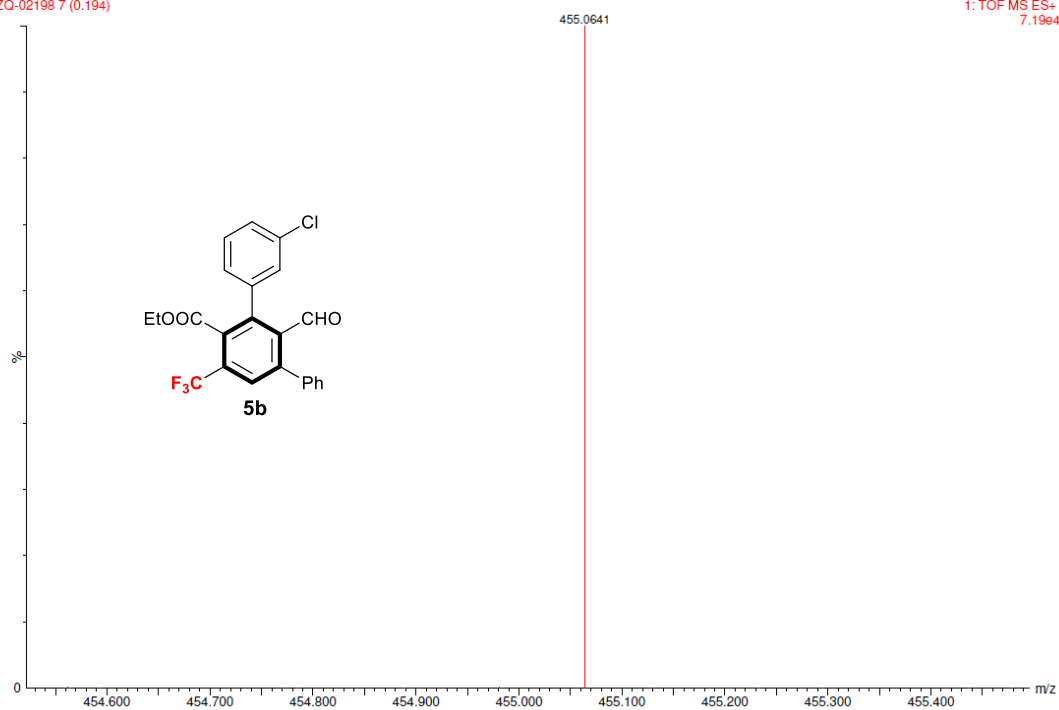

ZQ-02199 7 (0.194)

1: TOF MS ES+  
6.4294

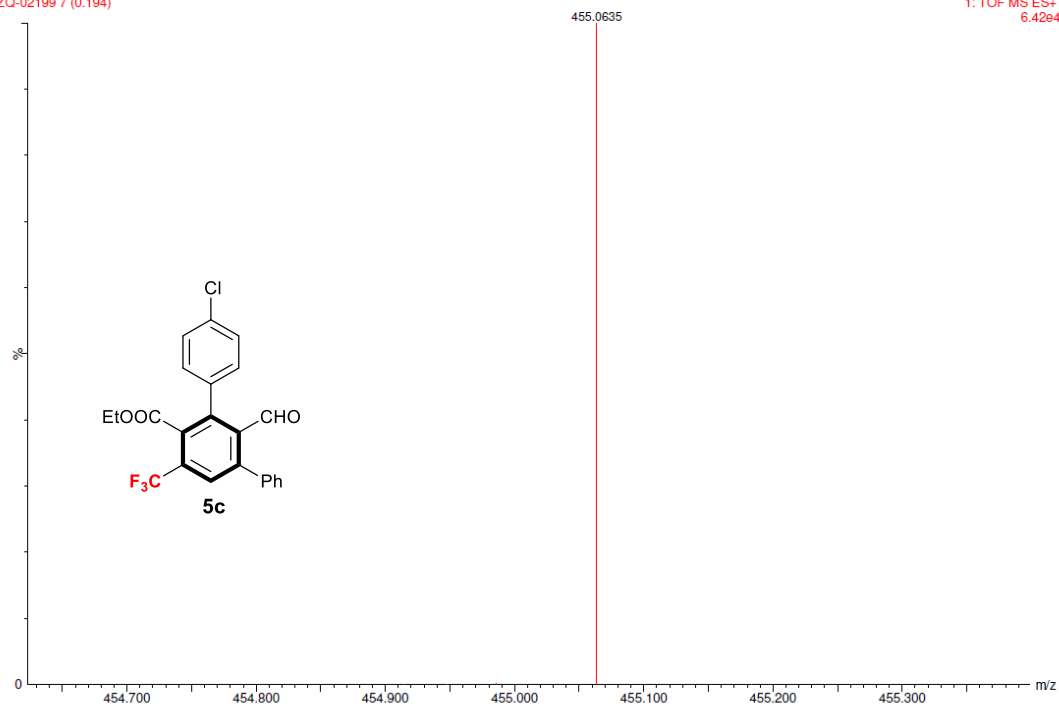

ZQ-02192 7 (0.194)

1: TOF MS ES+  
2.5495

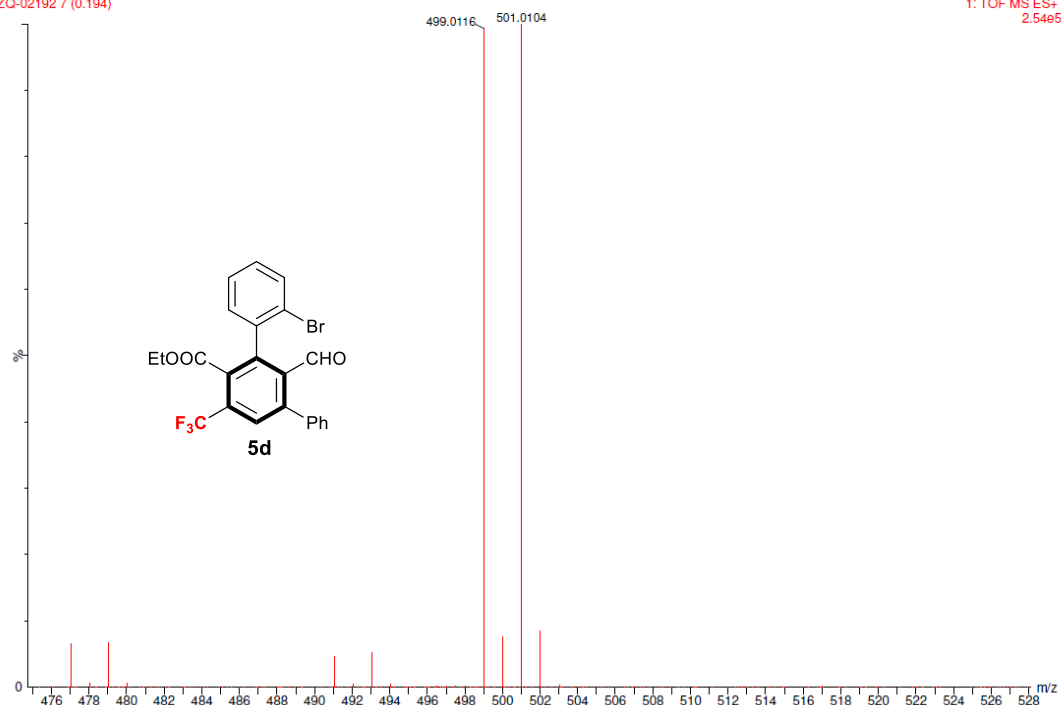

ZQ-02194 7 (0.194)

1: TOF MS ES+  
3.56e4

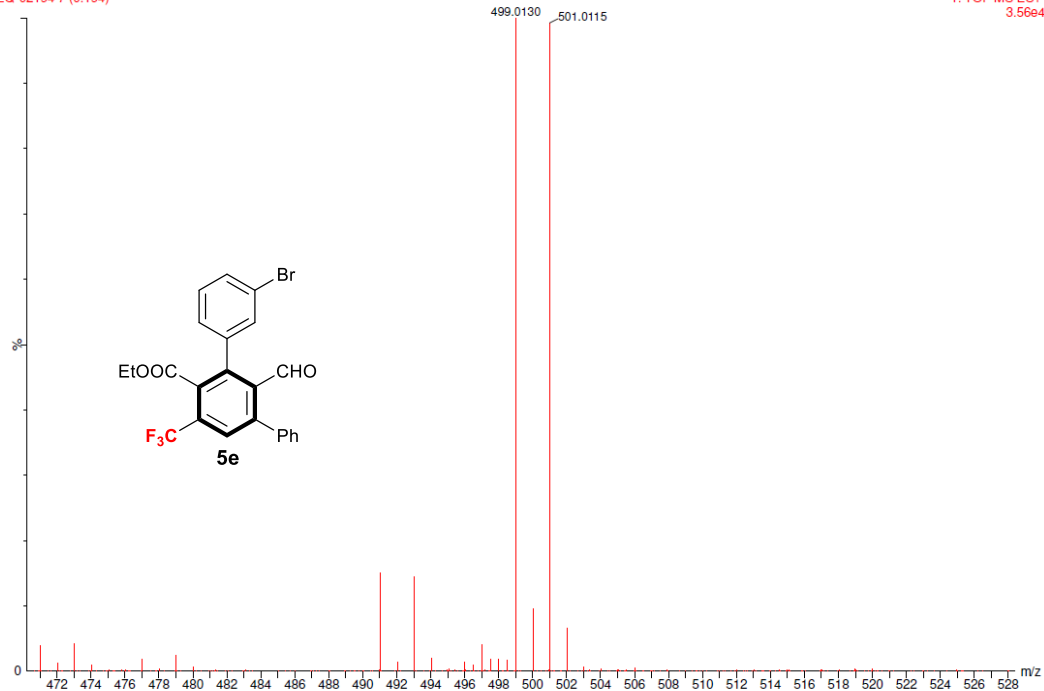

ZQ-2F-2 27 (0.653)

1: TOF MS ES+  
1.93e4

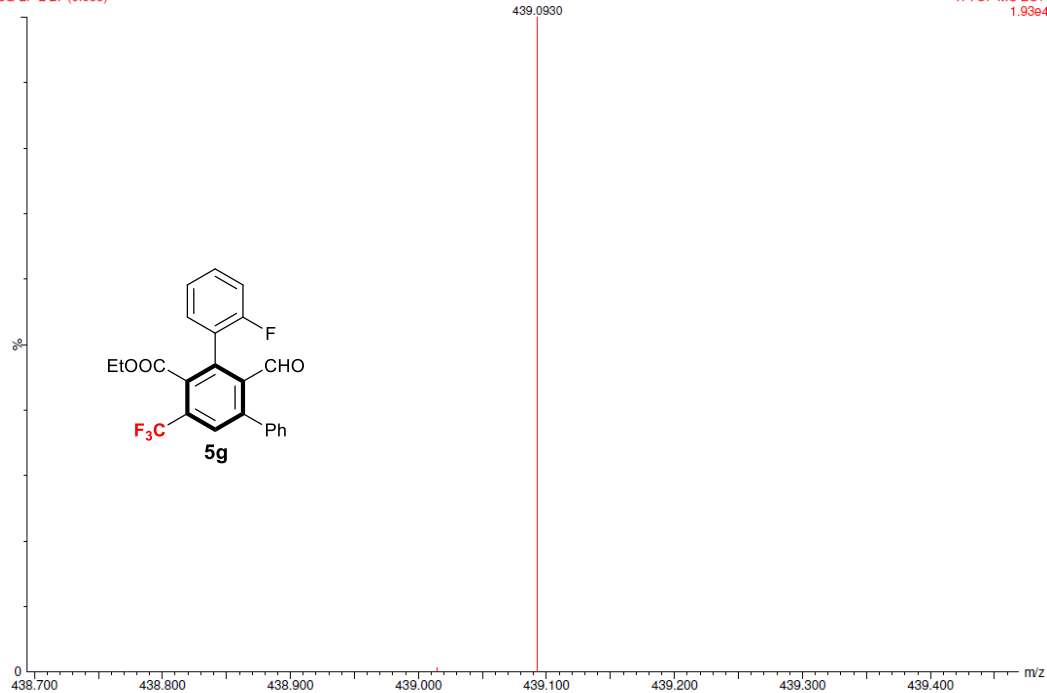

ZQ-02196 7 (0.194)

1: TOF MS ES+  
1.36e5

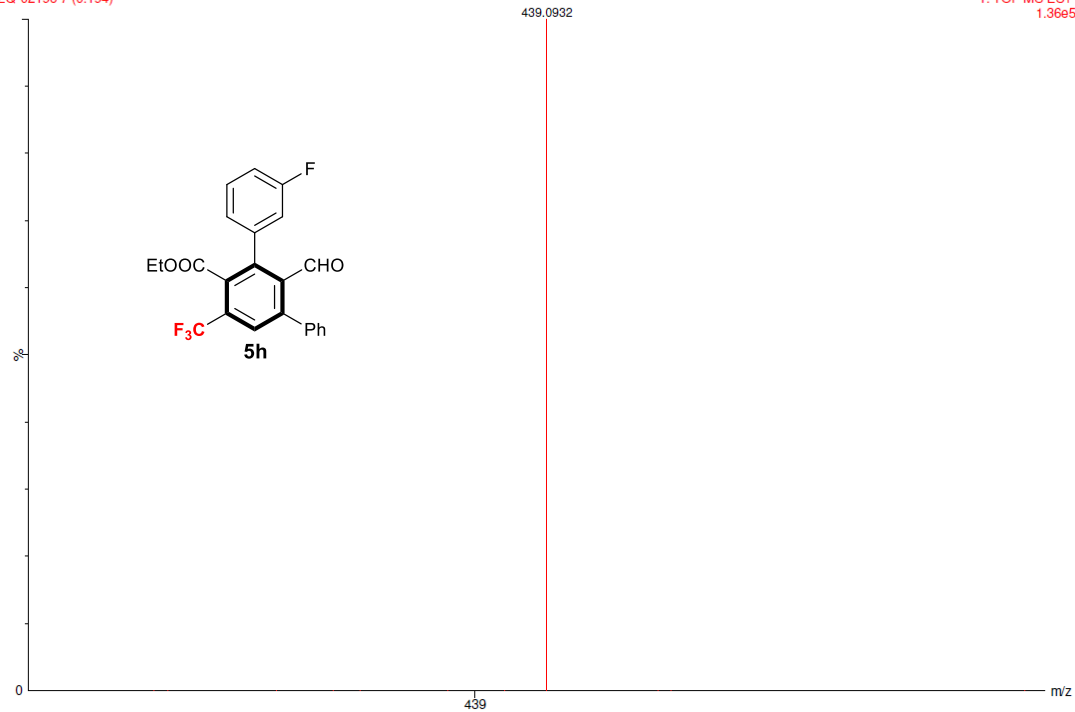



ZQ-02197 7 (0.194)

1: TOF MS ES+  
6.94e4

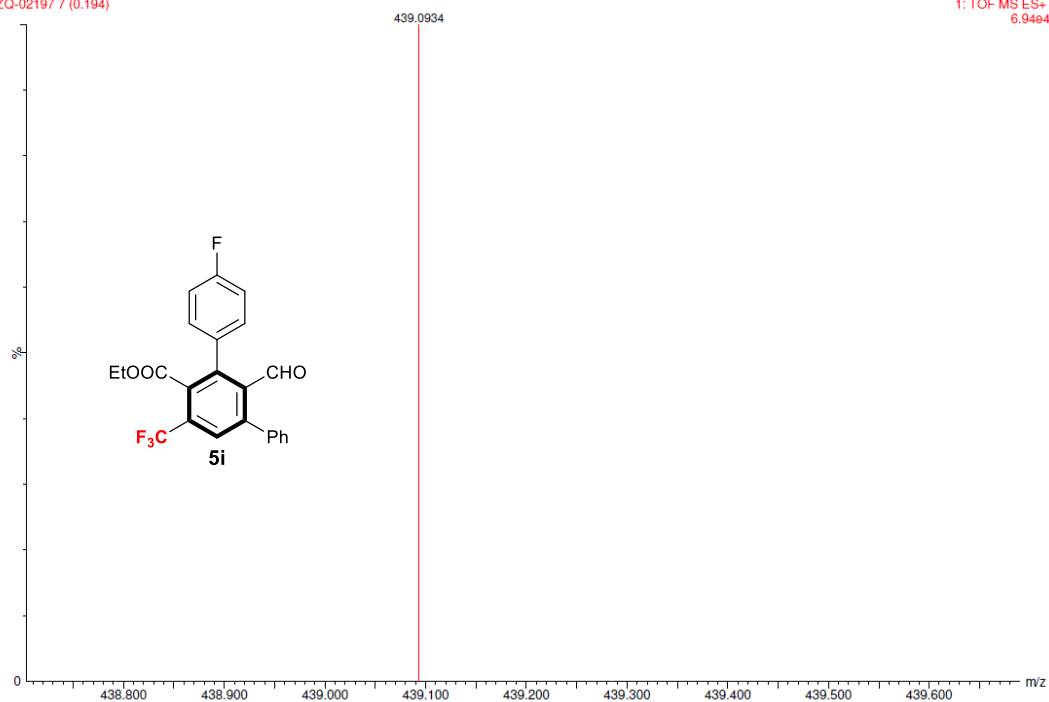

ZQ-021910 7 (0.194)

1: TOF MS ES+  
4.99e5

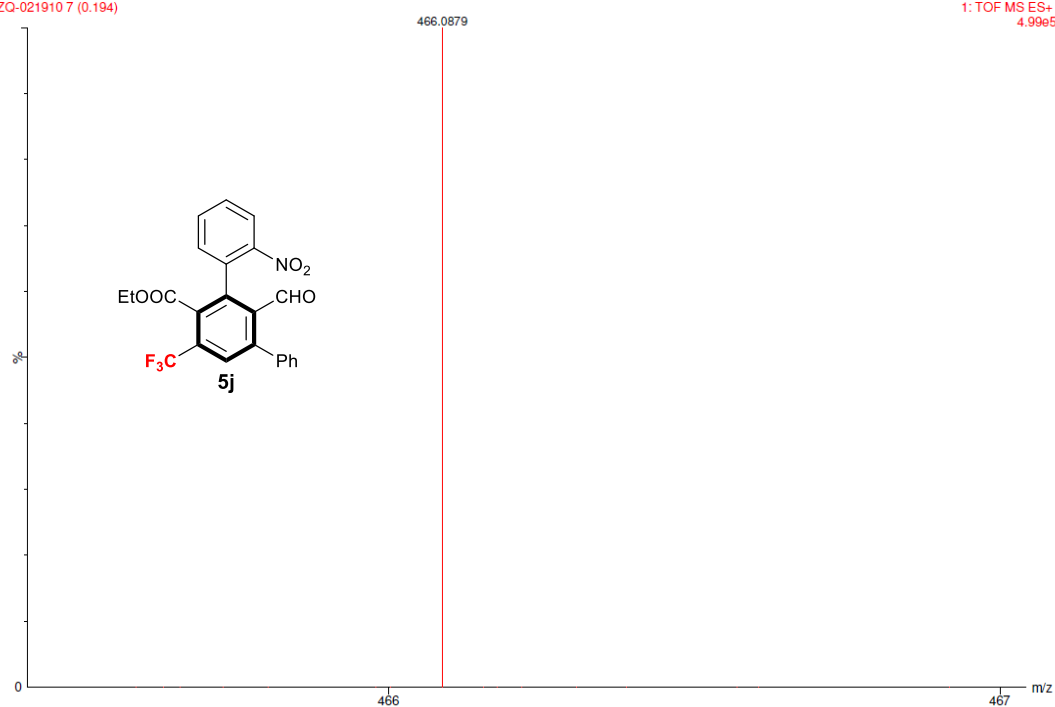

ZQ-021911 7 (0.194)

1: TOF MS ES+  
6.06e3

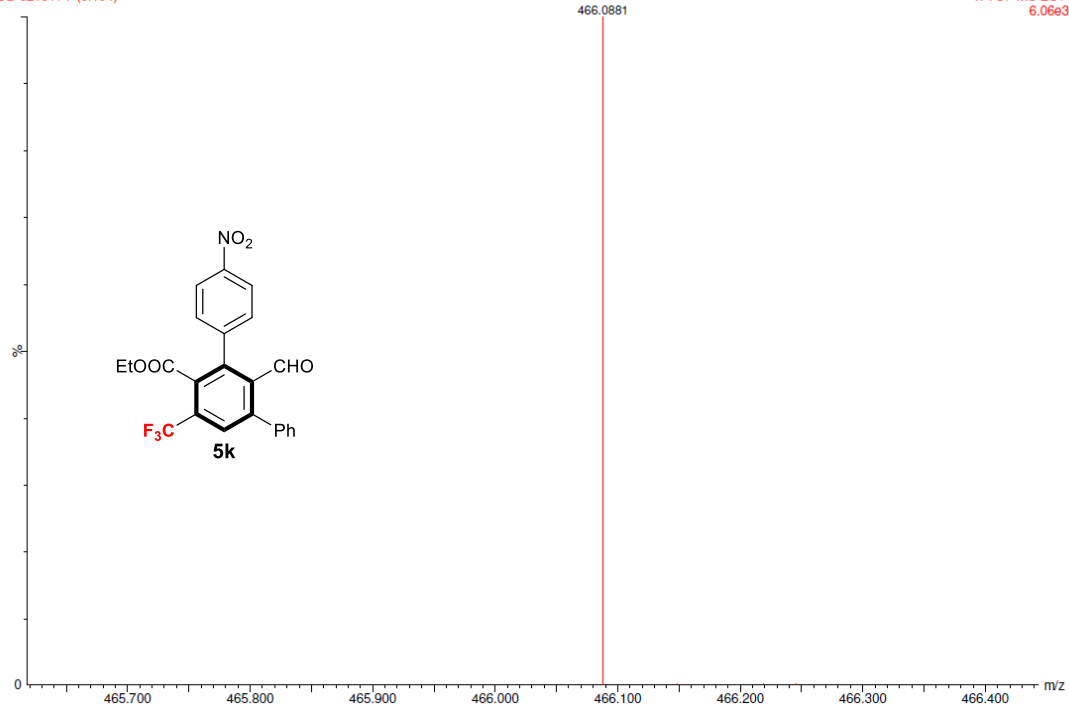

ZQ-021912 13 (0.335)

1: TOF MS ES+  
6.16e3

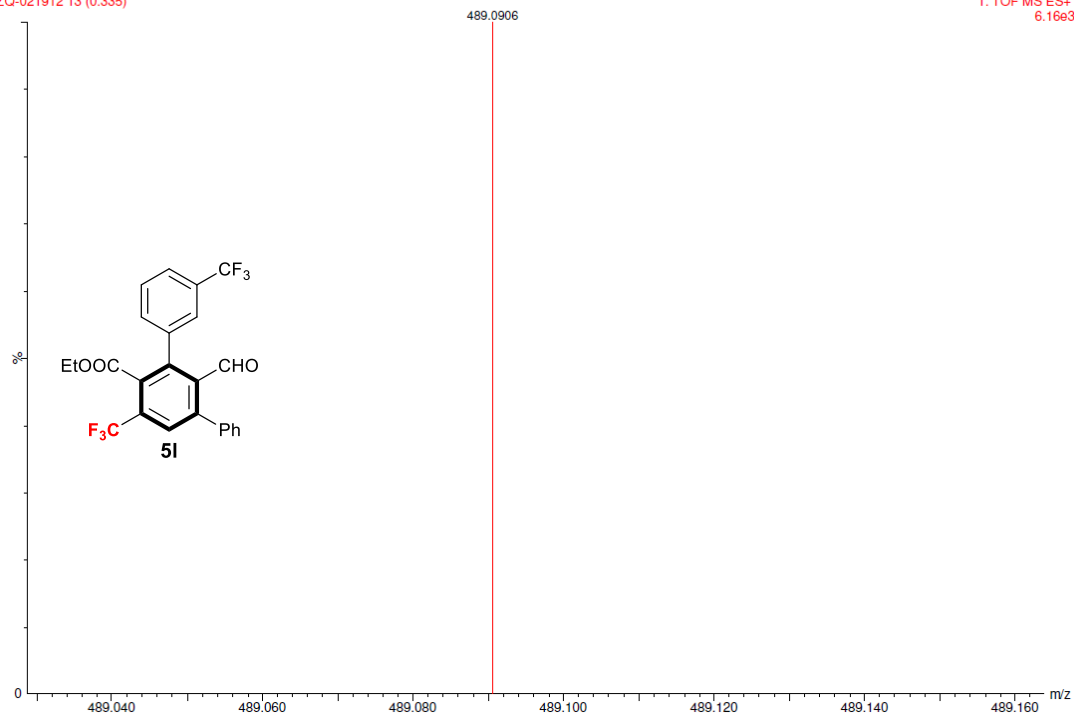

ZQ-021913 7 (0.194)

1: TOF MS ES+  
7.49e5

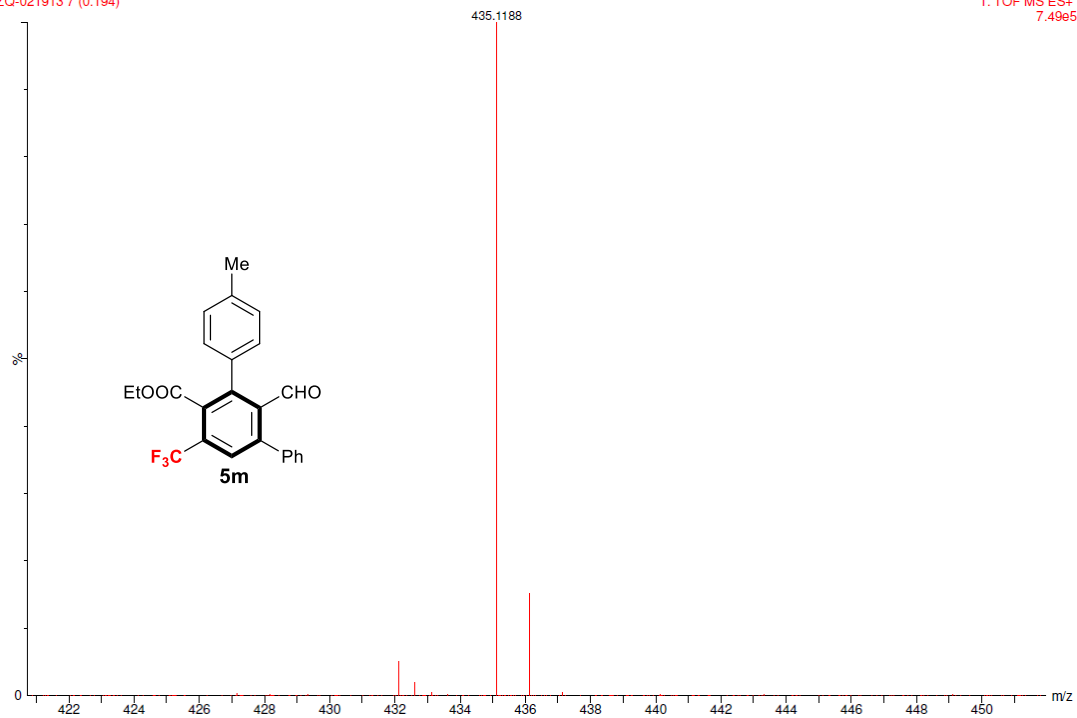

ZQ-021914 7 (0.194)

1: TOF MS ES+  
1.28e6

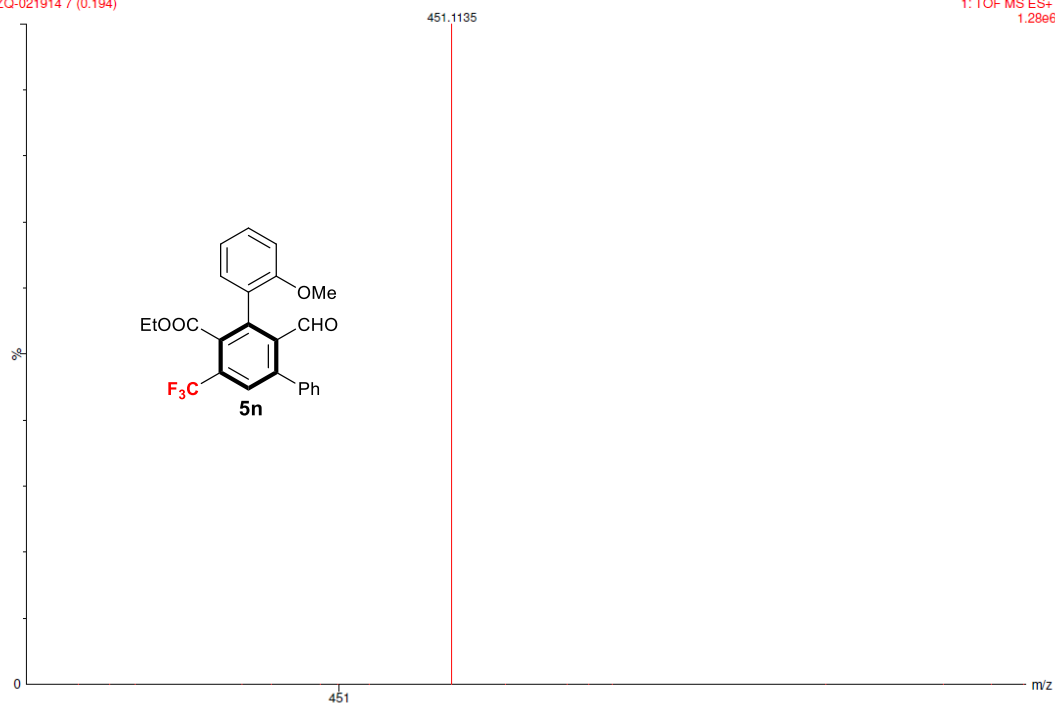

ZQ-021915 13 (0.335)

1: TOF MS ES+  
4.60e4

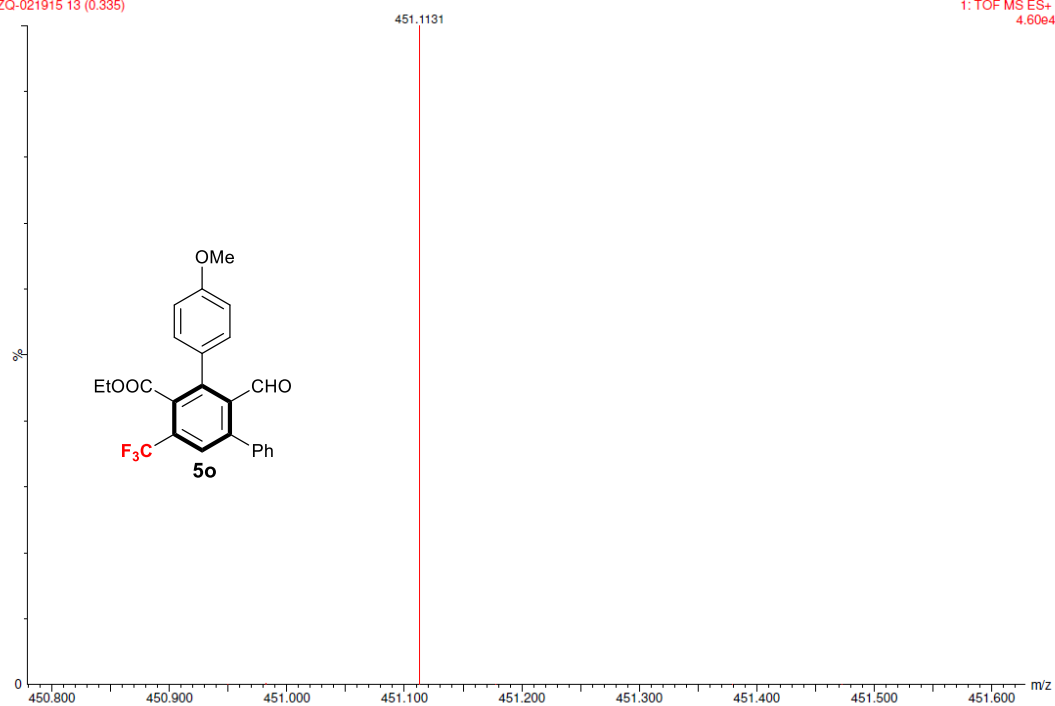

ZQ-021916 7 (0.194)

1: TOF MS ES+  
8.77e4

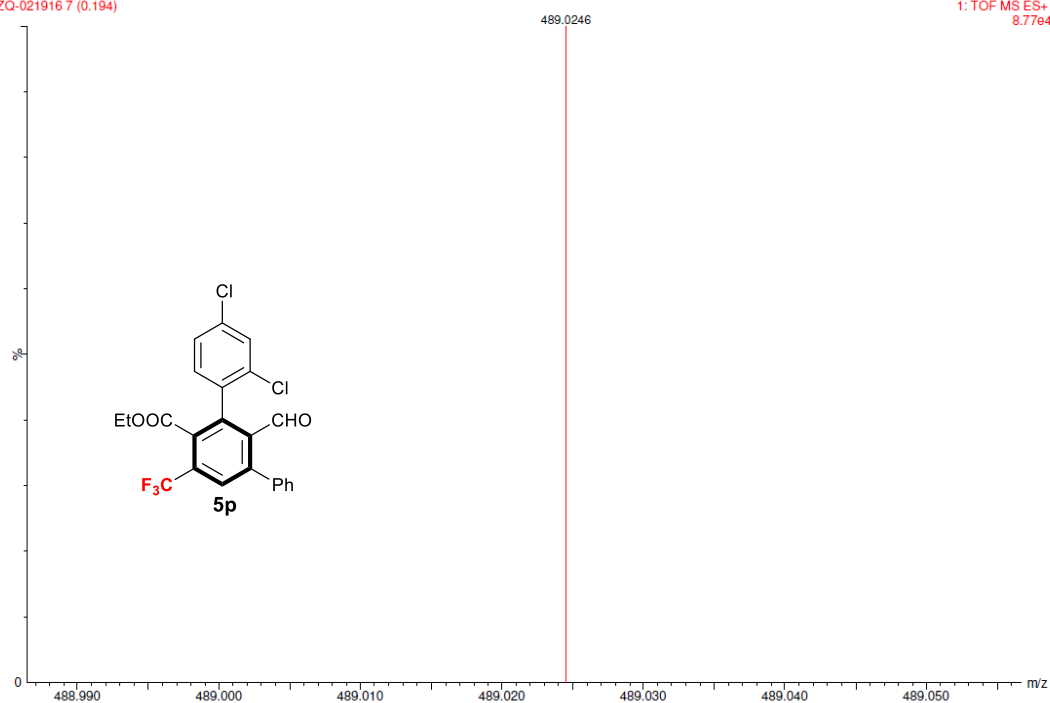

ZQ-021917 10 (0.265)

1: TOF MS ES+  
5.77e4

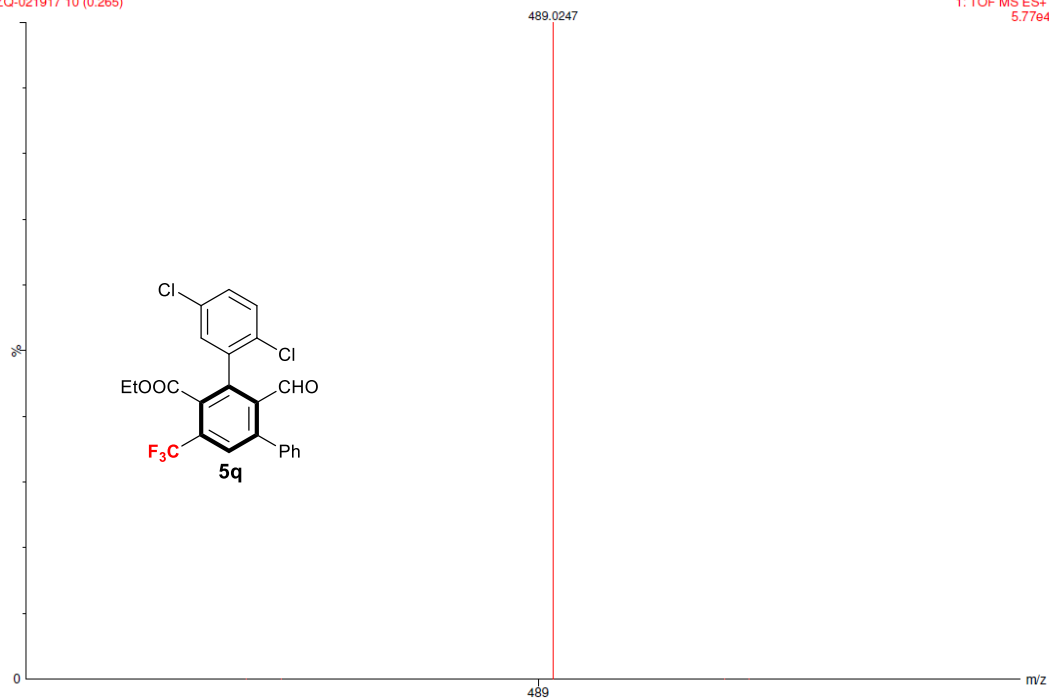

ZQ-021918 8 (0.211)

1: TOF MS ES+  
4.29e3

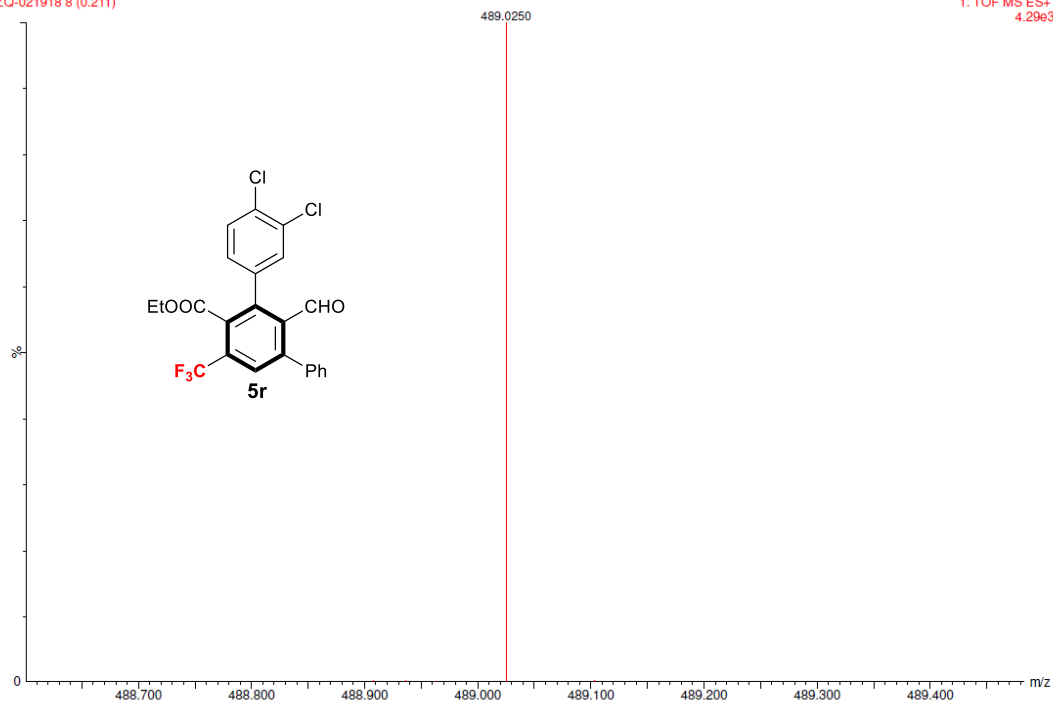

ZQ-021919 11 (0.282)

1: TOF MS ES+  
3.05e4

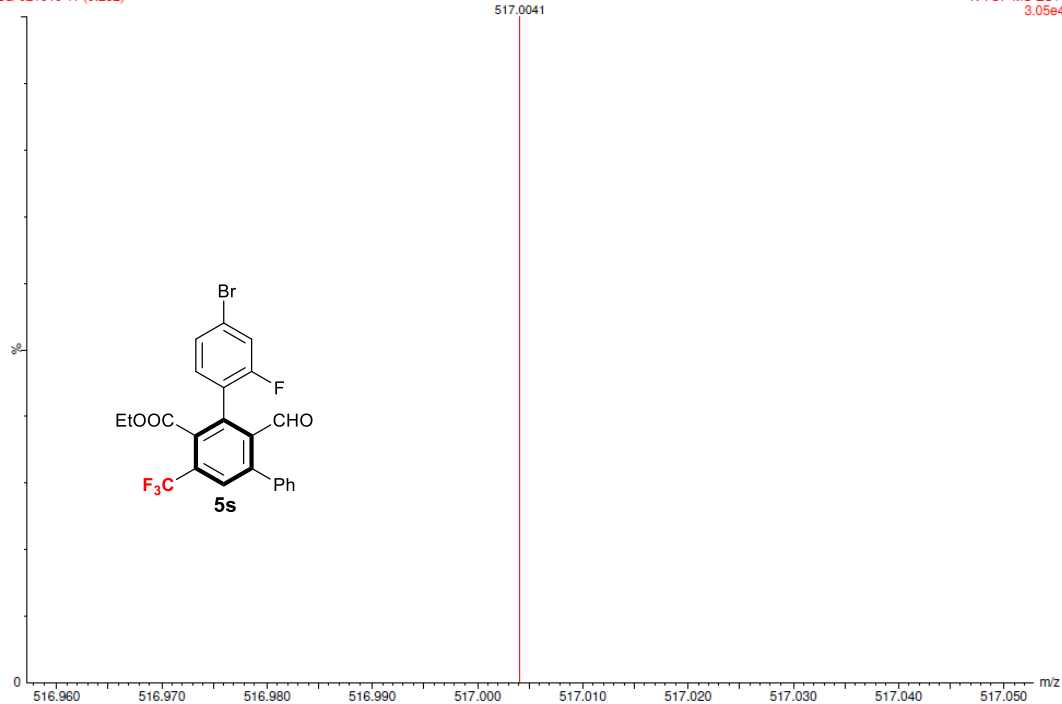

ZQ-021920 12 (0.299)

1: TOF MS ES+  
3.58e3

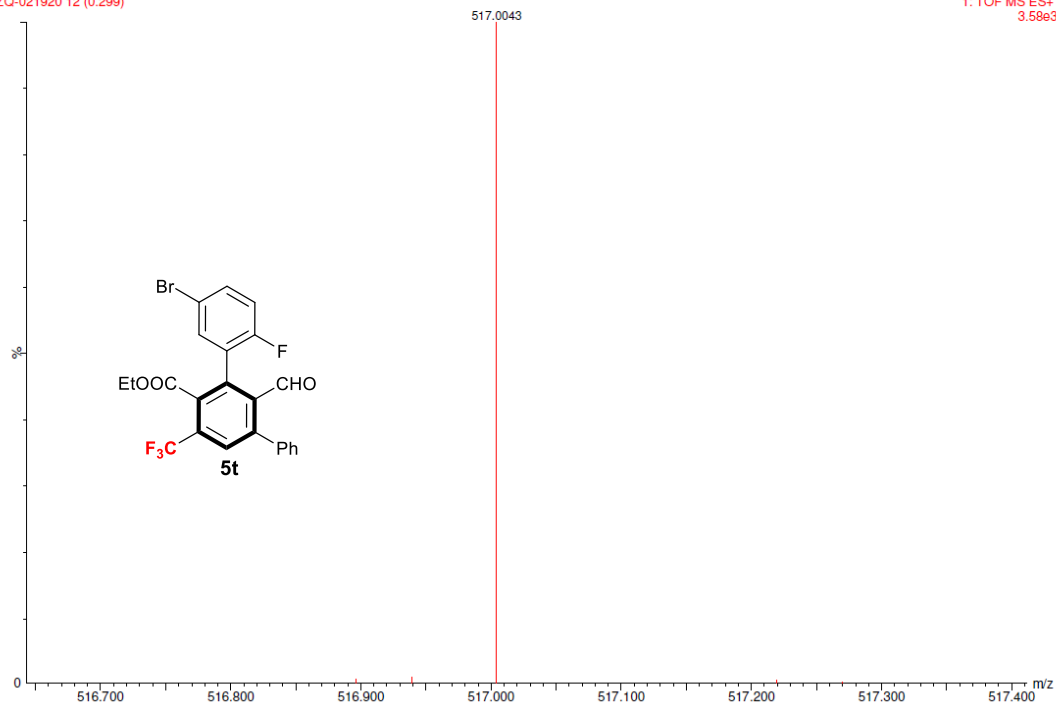

# Spectrum Plot Report

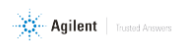

|                |                     |              |            |                                  |
|----------------|---------------------|--------------|------------|----------------------------------|
| Name           | zq-0711             | Rack Pos.    | Instrument | Operator                         |
| Inj. Vol. (ul) | 10                  | Plate Pos.   | IRM Status |                                  |
| Data File      | WorklistData-0001.d | Method (Acq) | Comment    |                                  |
|                |                     | TOF.m        | Success    | Acq. Time (Local)                |
|                |                     |              |            | 7/13/2019 1:24:55 PM (UTC+08:00) |

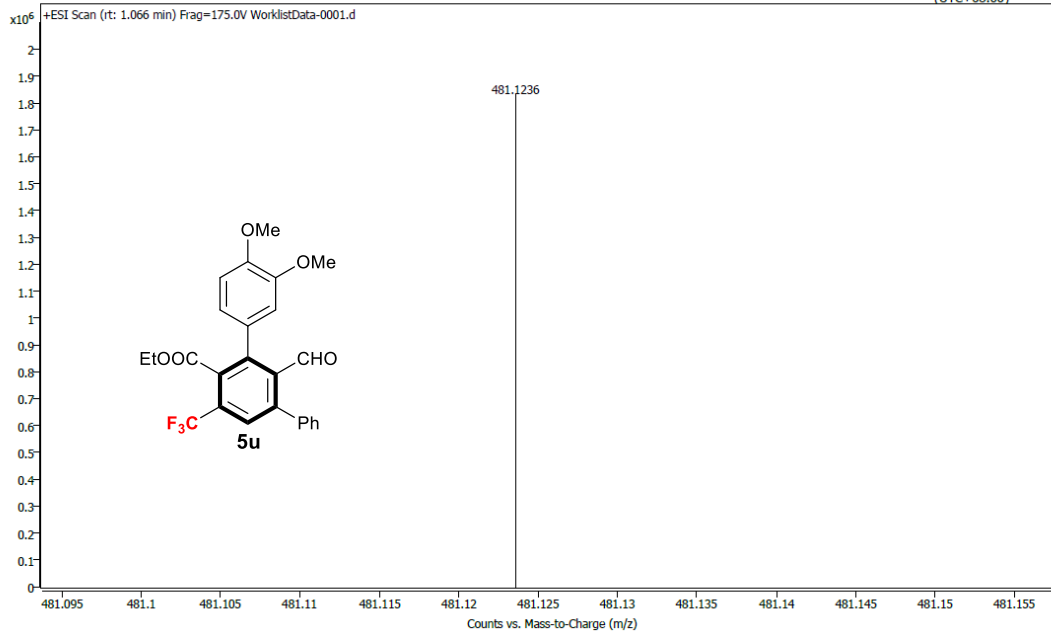

ZQ-021921 13 (0.335)

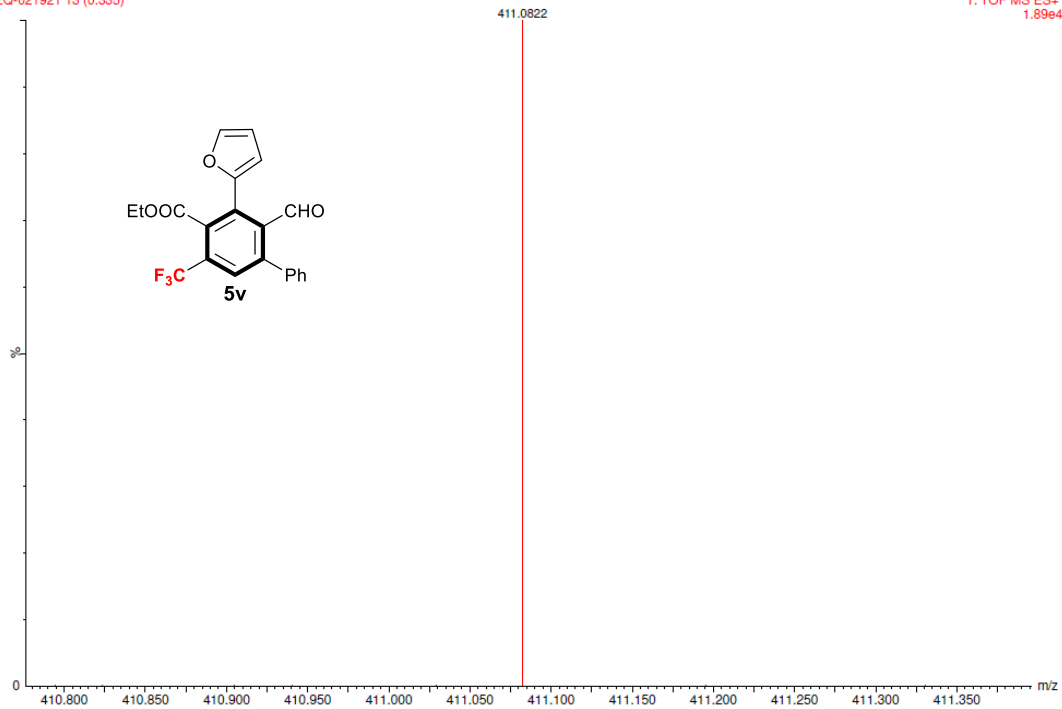

ZQ-021922 9 (0.228)

1: TOF MS ES+  
7.49e5

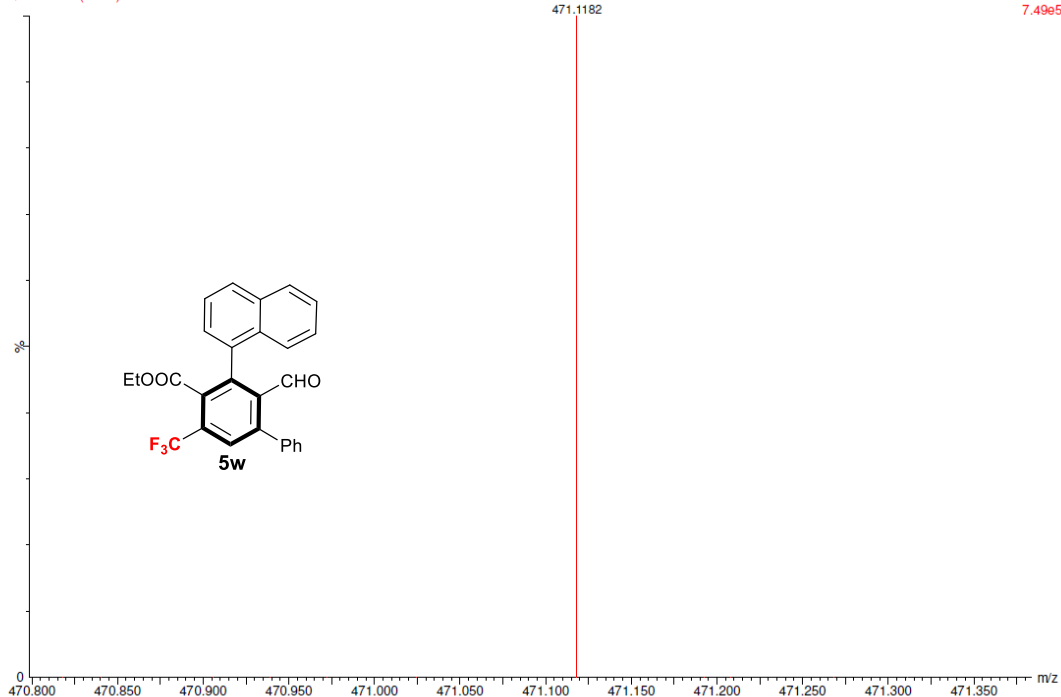

ZQ-021923 13 (0.335)

1: TOF MS ES+  
1.40e4

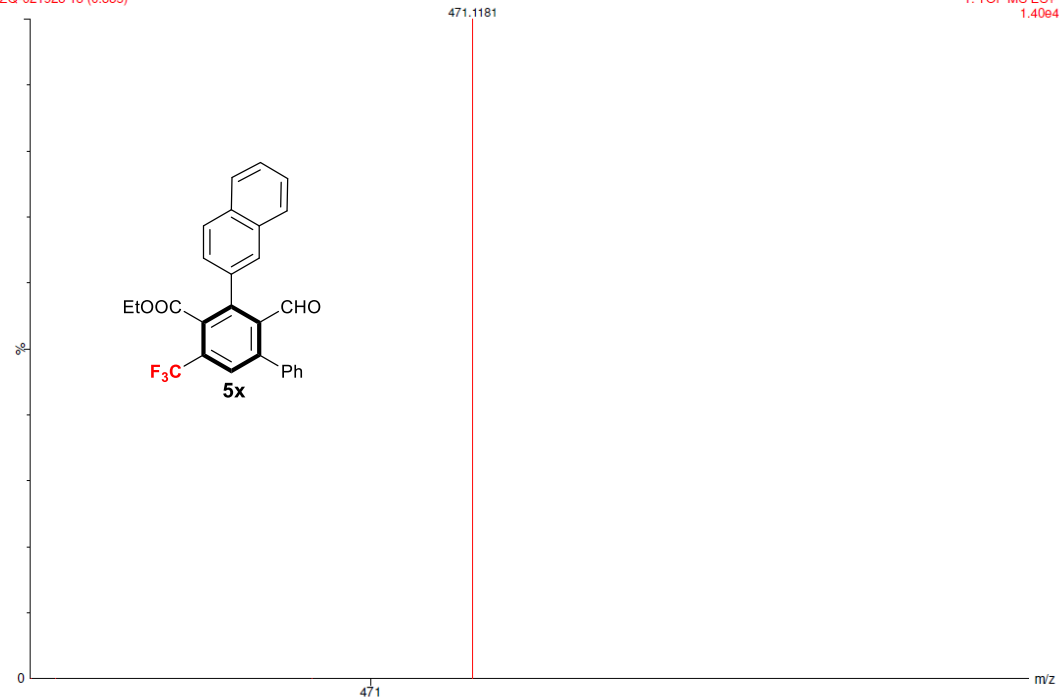



ZQ-021924 8 (0.211)

1: TOF MS ES+  
7.48e5

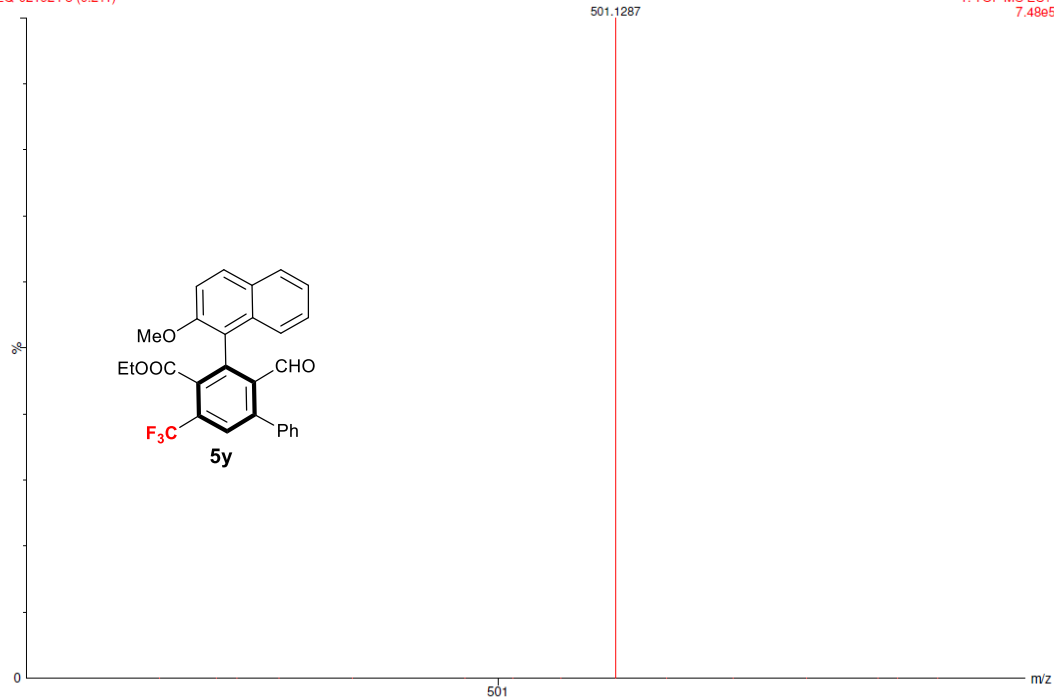

ZQ-190604-5 8 (0.211)

1: TOF MS ES+  
1.69e3

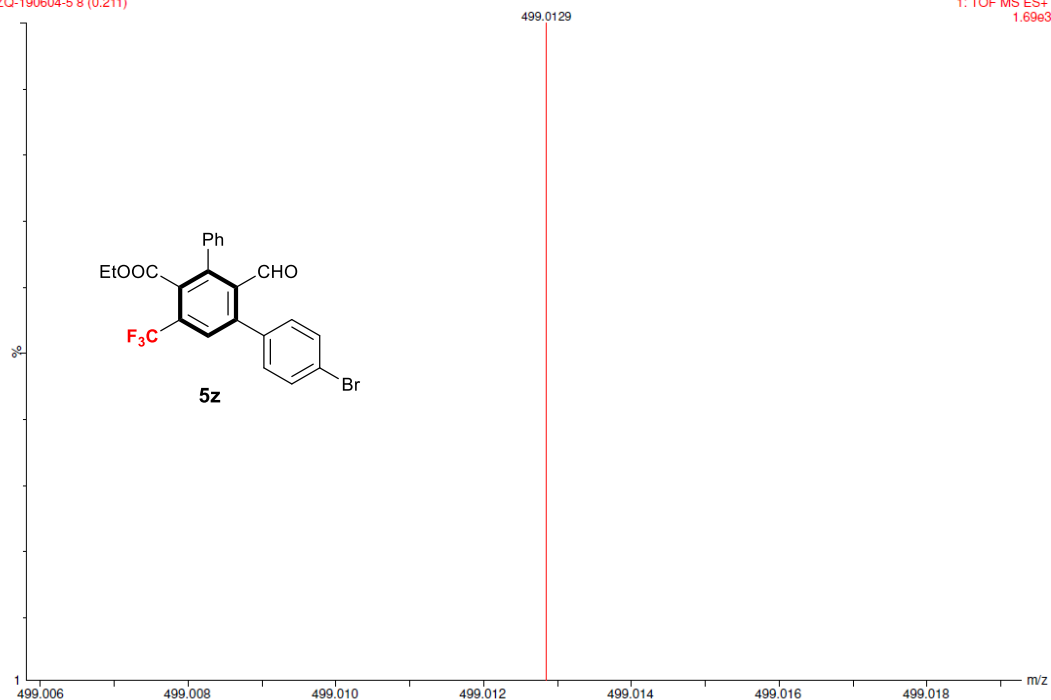

ZQ-190604-4 9 (0.228)

1: TOF MS ES+  
5.31e3

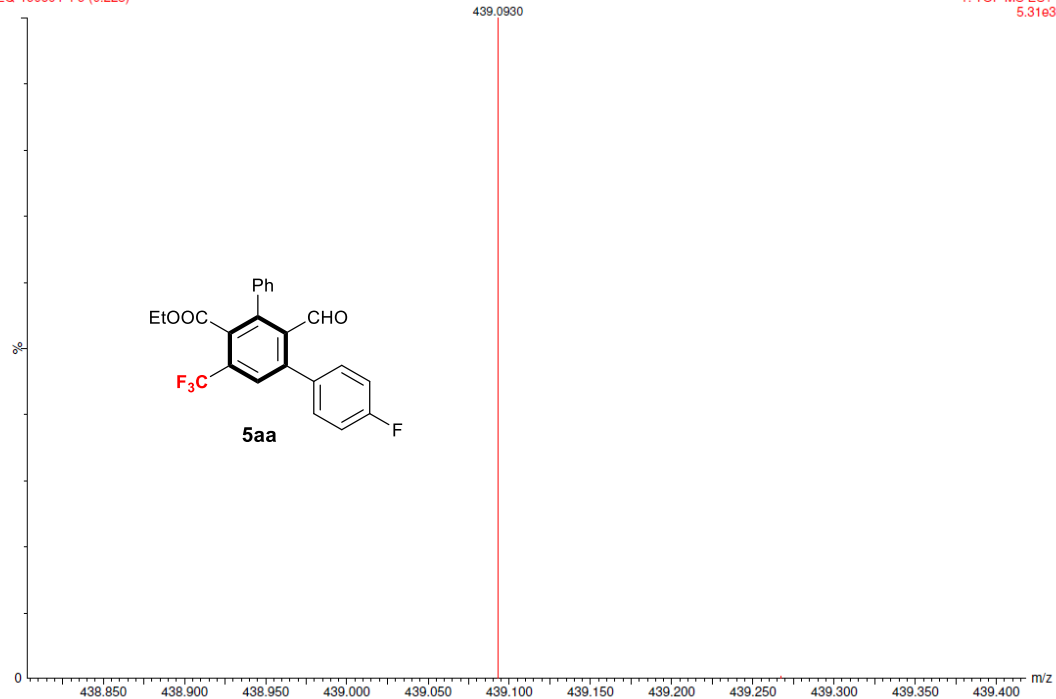

LSJ-06117 11 (0.282)

1: TOF MS ES+  
3.52e5

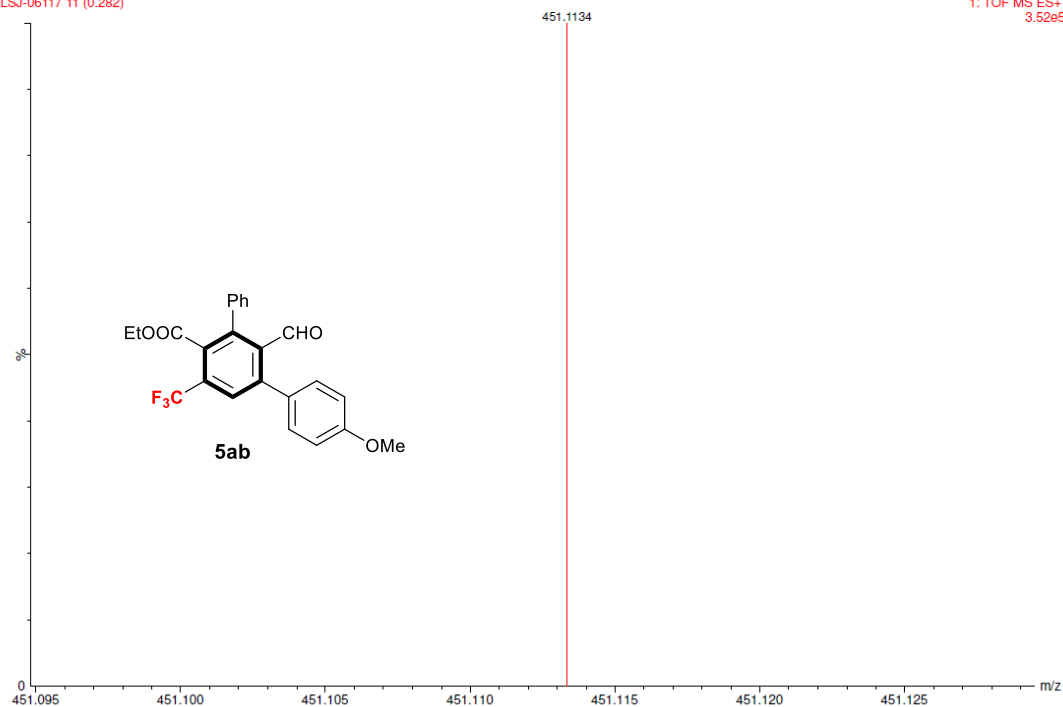

ZQ-190604-3 8 (0.211)

1: TOF MS ES+  
9.93e3

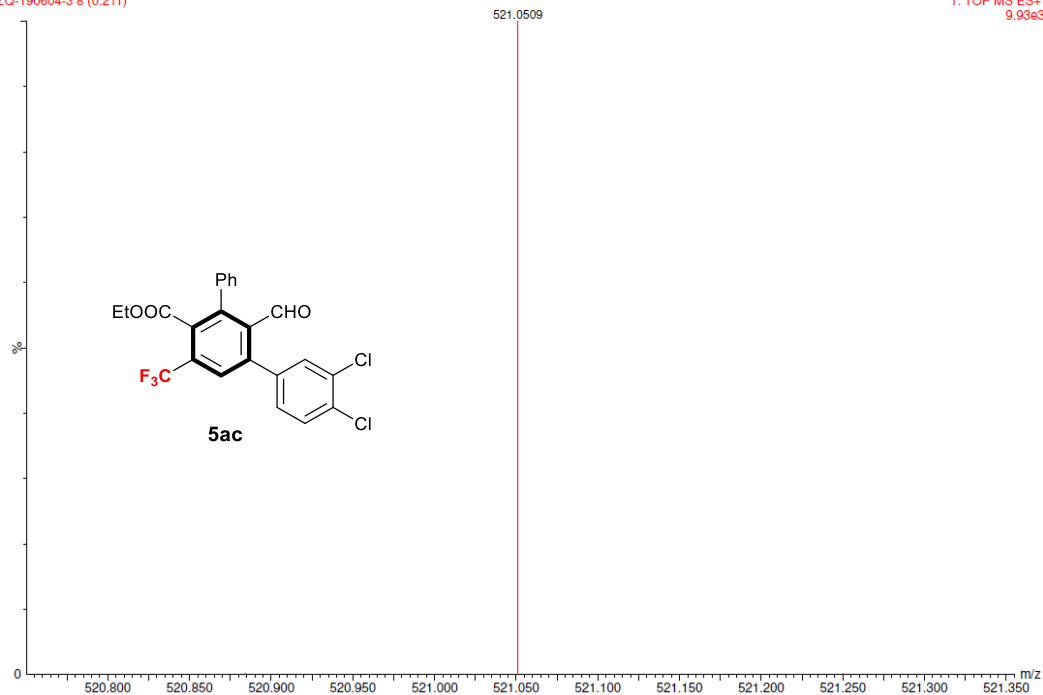

LSJ-06118 14 (0.352)

1: TOF MS ES+  
1.56e5

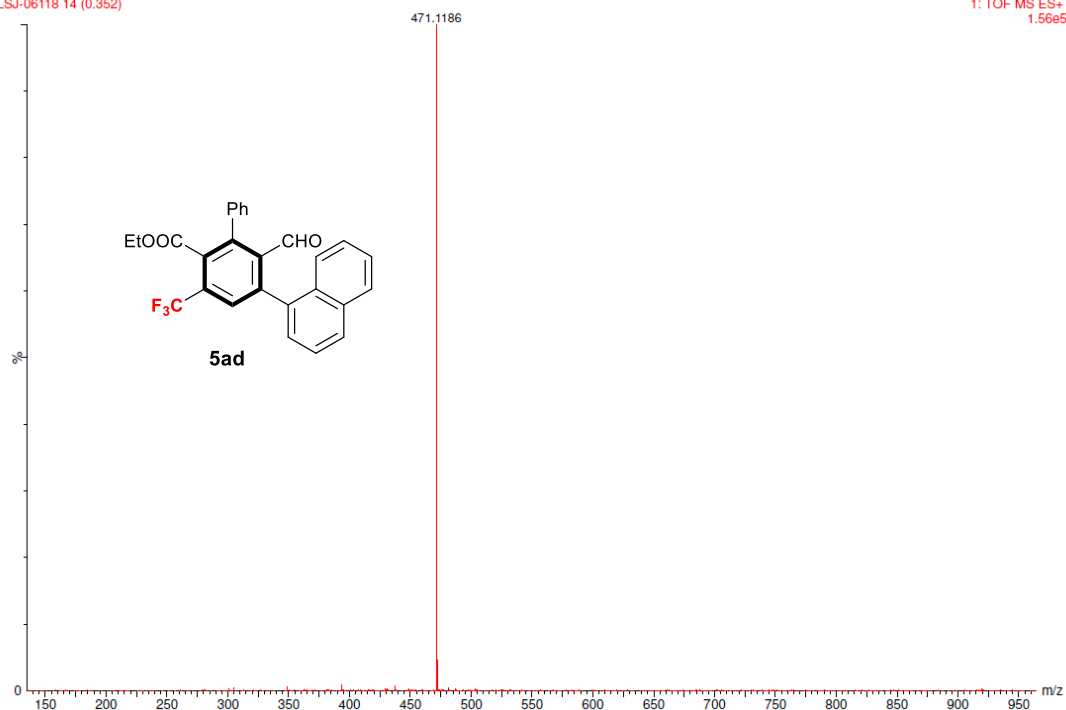

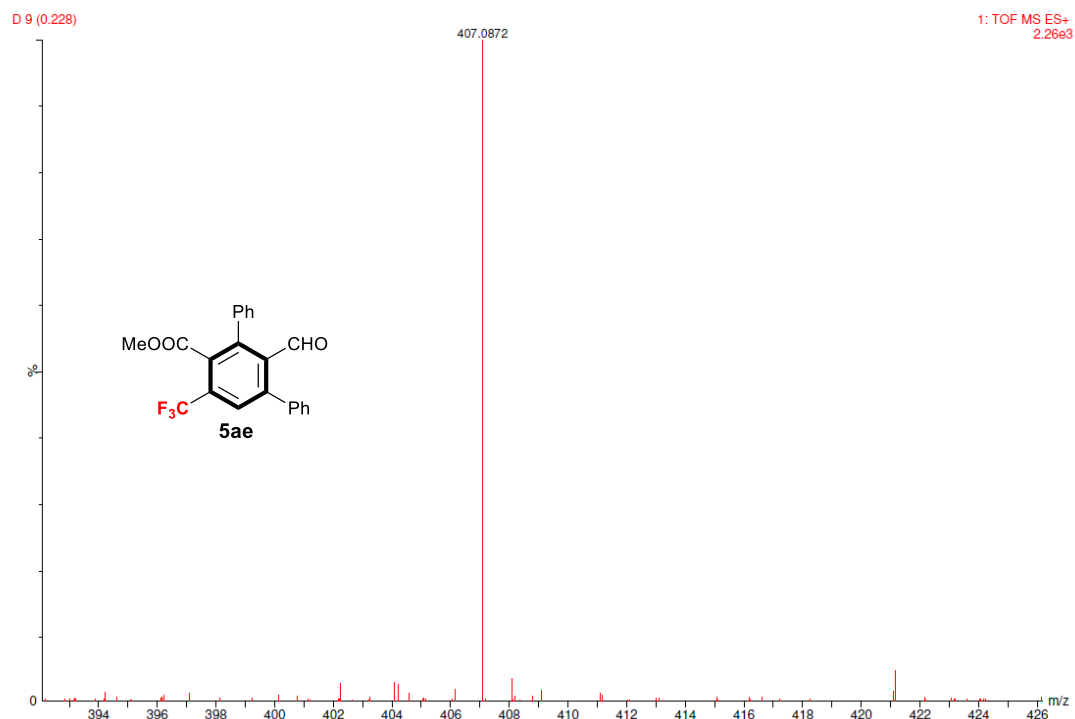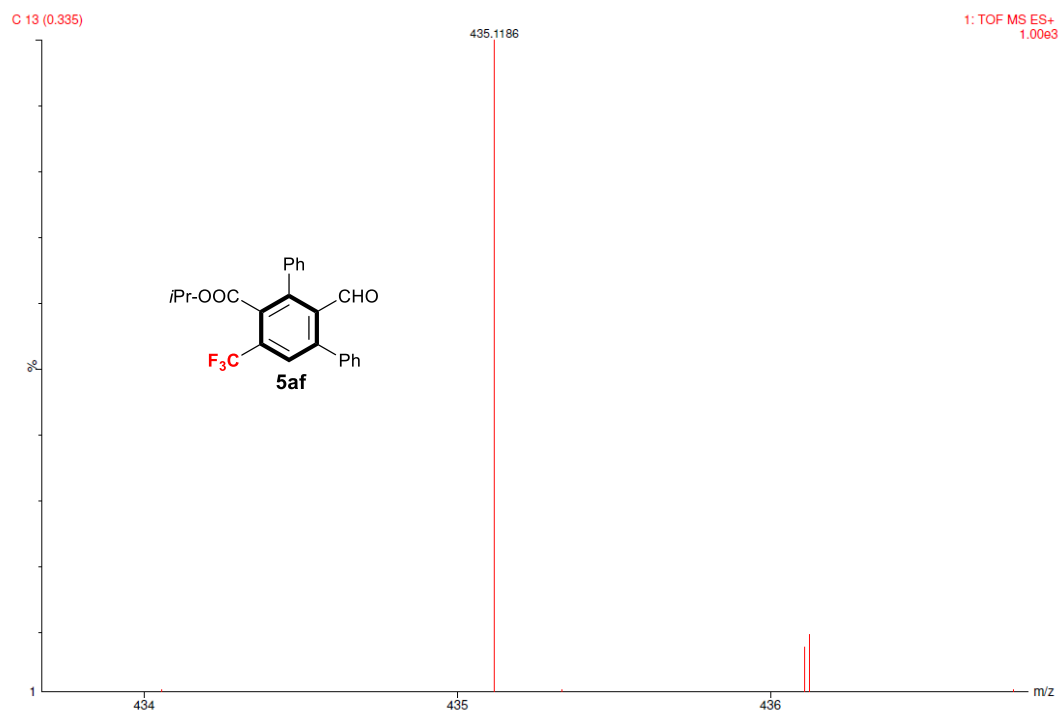

ZQ-090727 20 (0.249)

1: TOF MS ES+  
3.93e4

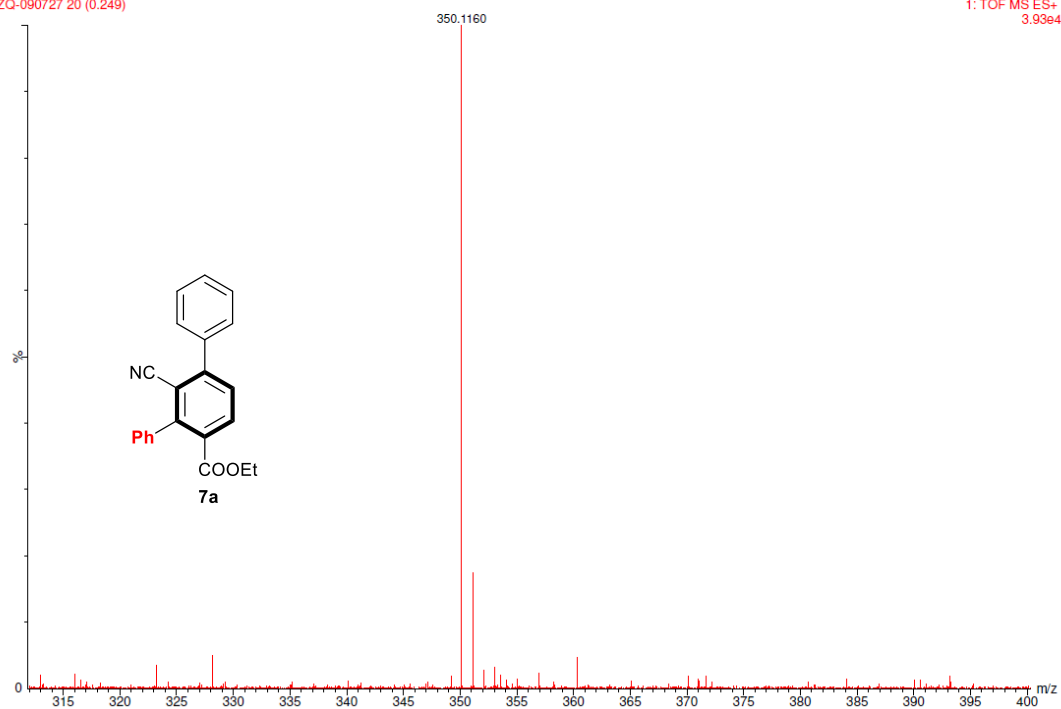

ZQ-090729 12 (0.159)

1: TOF MS ES+  
1.11e5

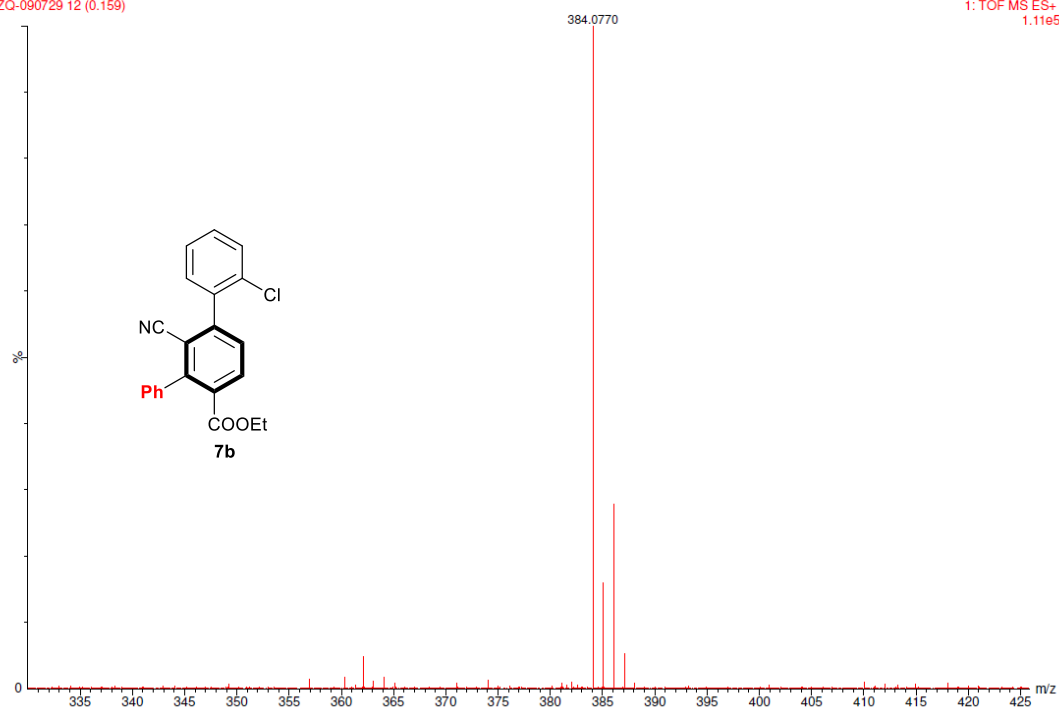

ZQ-090731 33 (0.402)

1: TOF MS ES+  
8.68e3

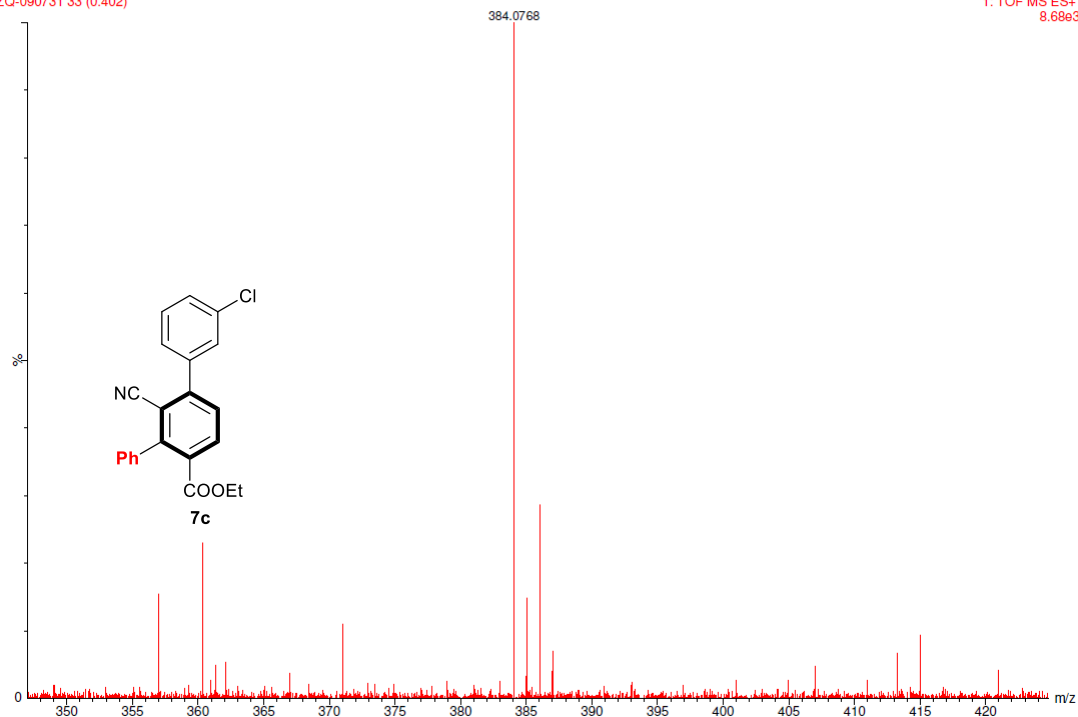

ZQ-090731 30 (0.356)

1: TOF MS ES+  
1.13e4

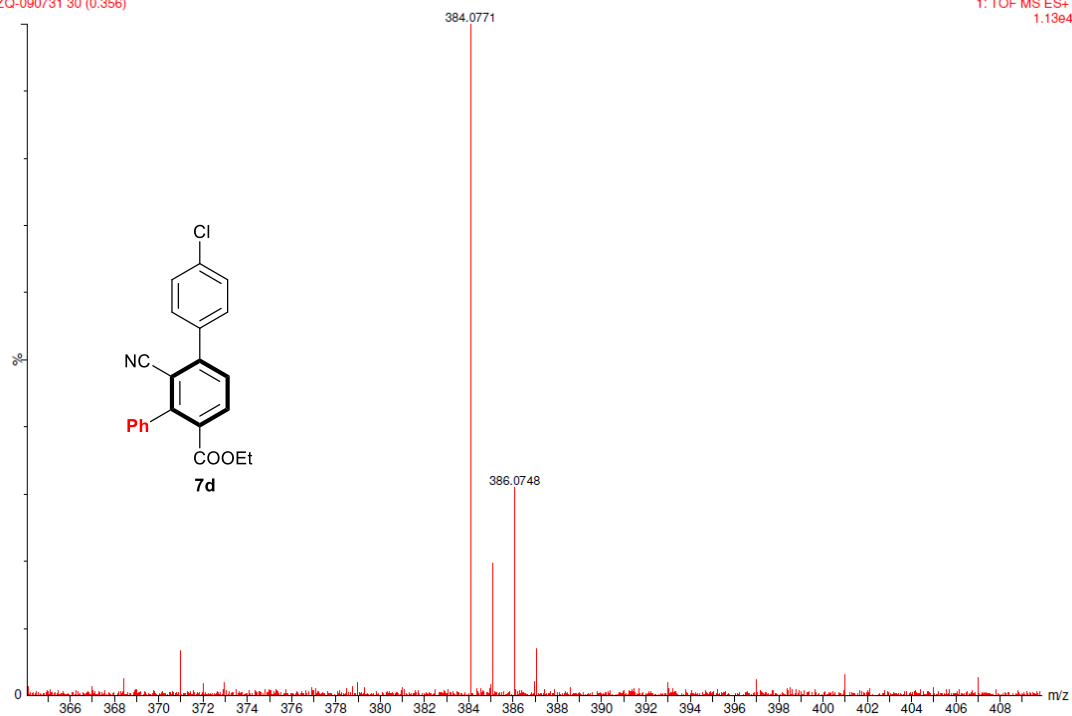

ZQ-090728 17 (0.223)

1: TOF MS ES+  
4.68e5

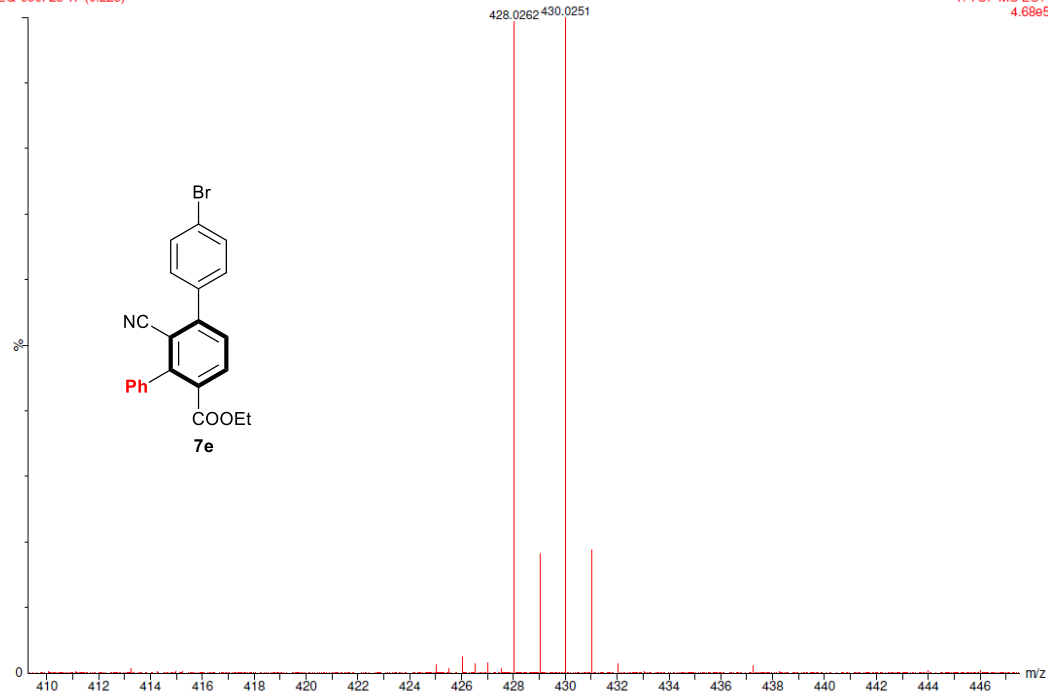

ZQ-090732 25 (0.312)

1: TOF MS ES+  
1.18e5

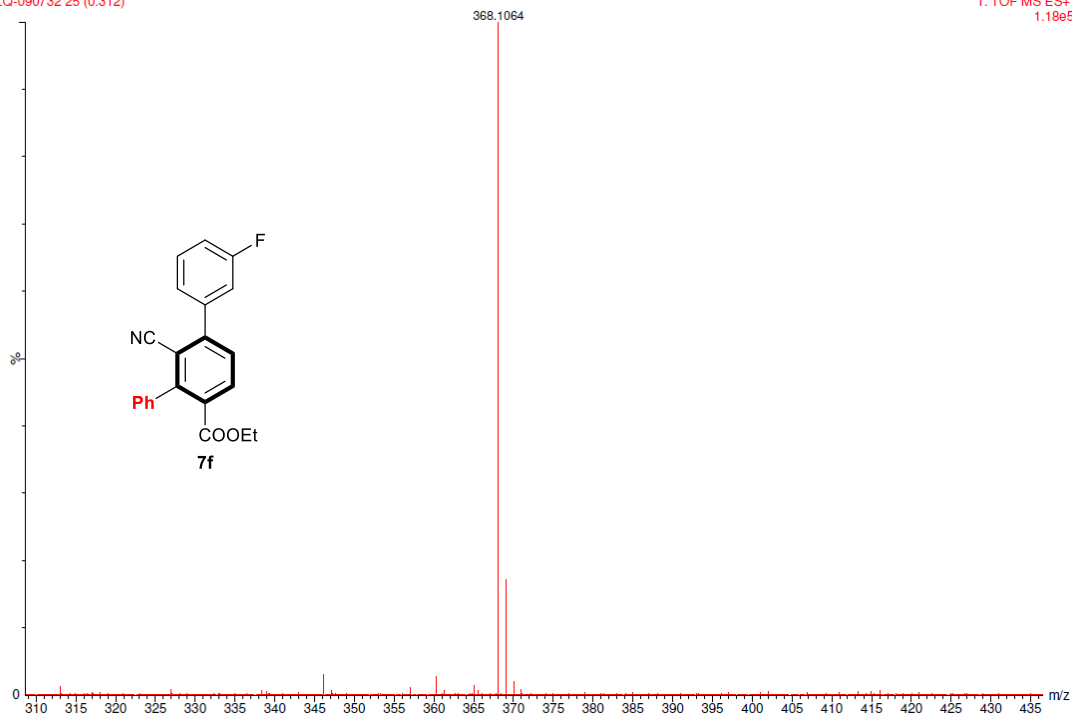

ZQ-090733 34 (0.411)

1: TOF MS ES+  
5.40e4

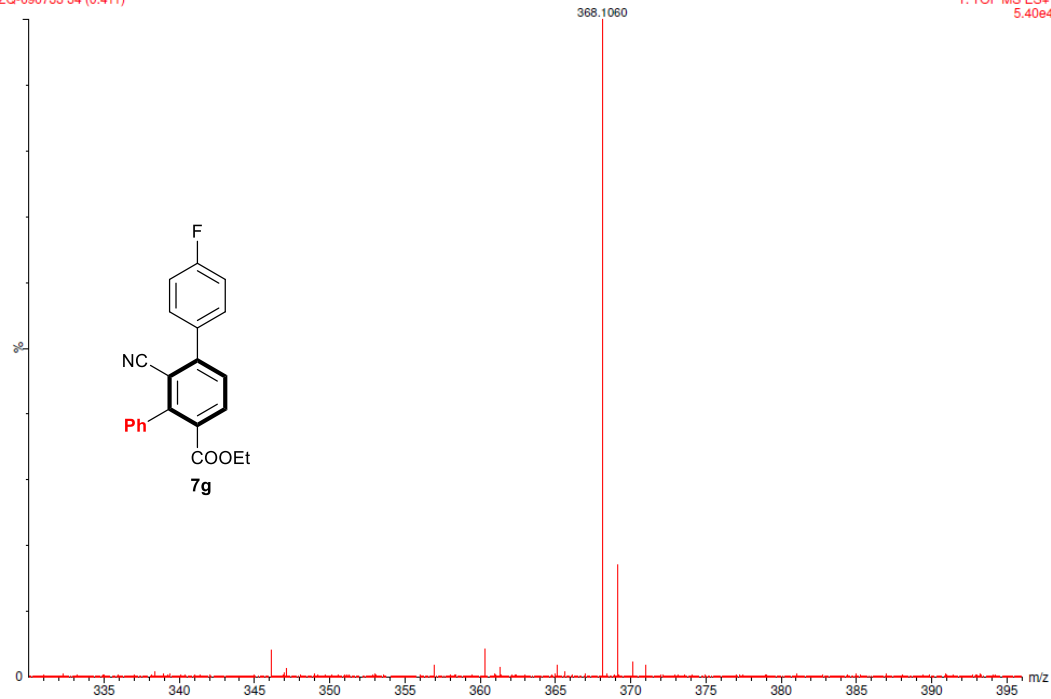

ZQ-090736 15 (0.186)

1: TOF MS ES+  
7.60e5

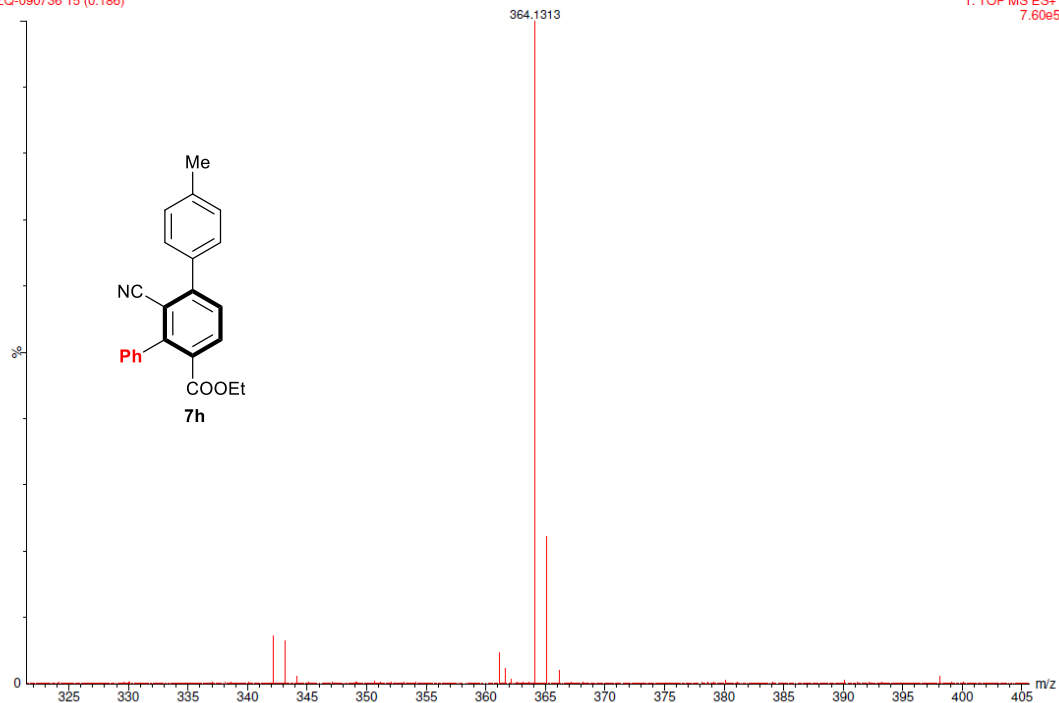



ZQ-090734 27 (0.330)

1: TOF MS ES+  
3.45e5

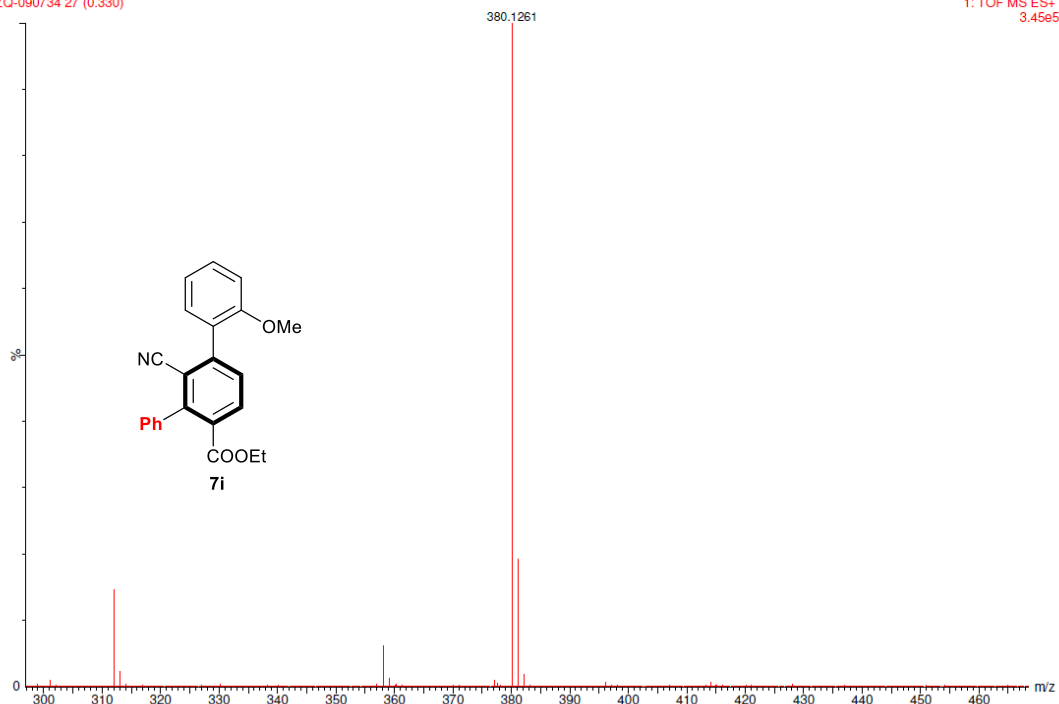

ZQ-090735 35 (0.419)

1: TOF MS ES+  
2.57e4

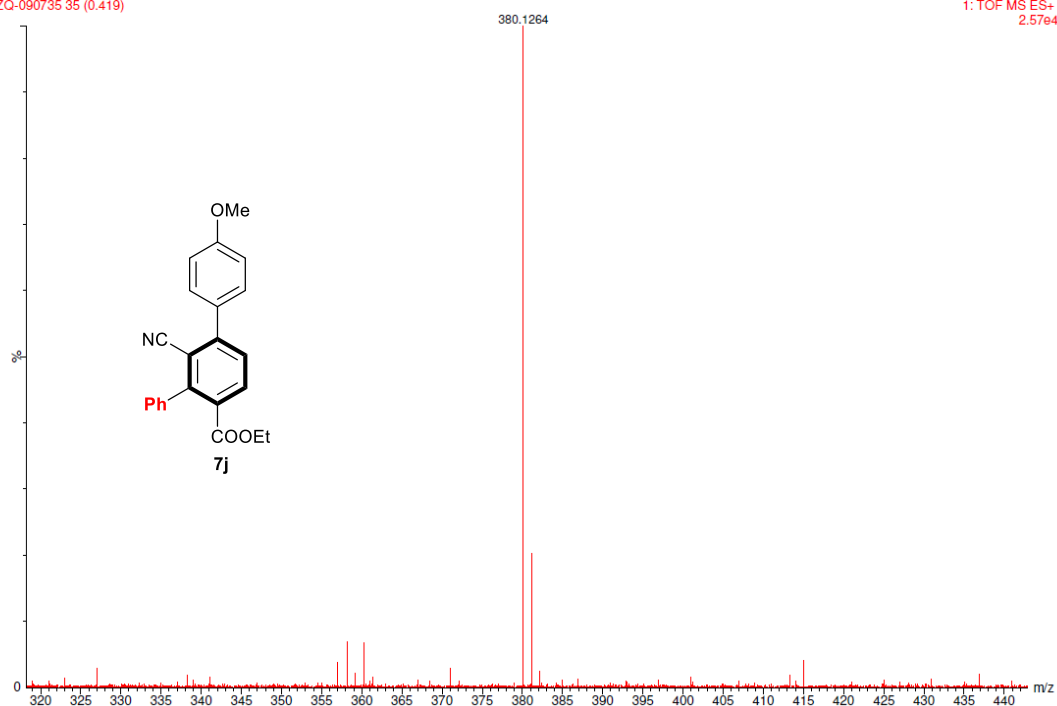

ZQ-01203 6 (0.157)

1: TOF MS ES+  
1.23e5

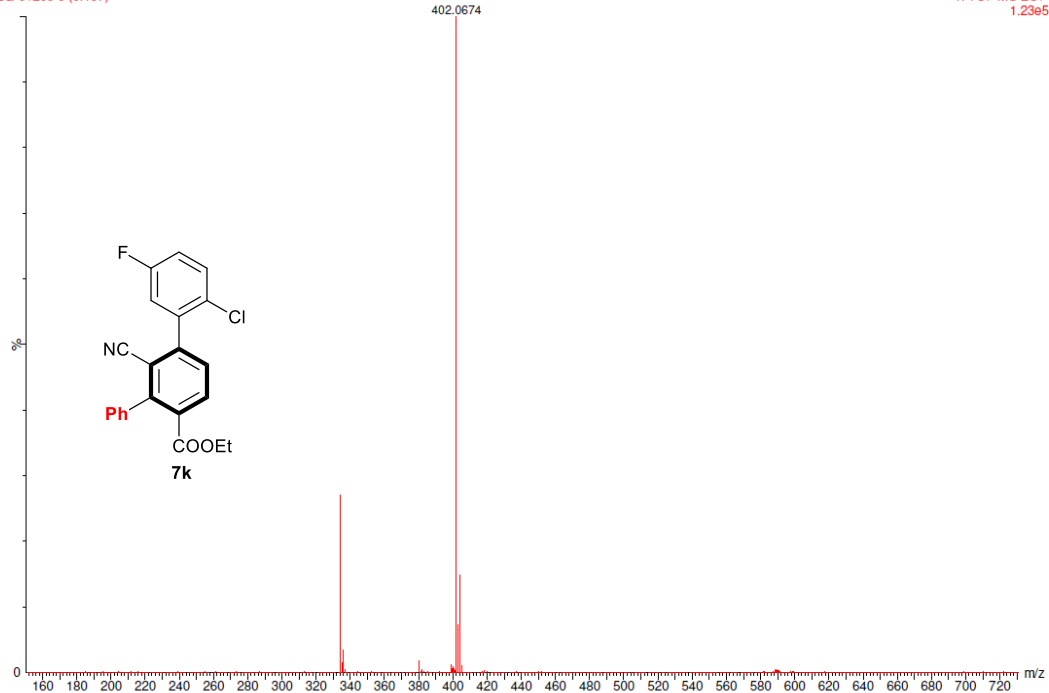

ZQ-0701-2 21 (0.511)

1: TOF MS ES+  
1.41e3

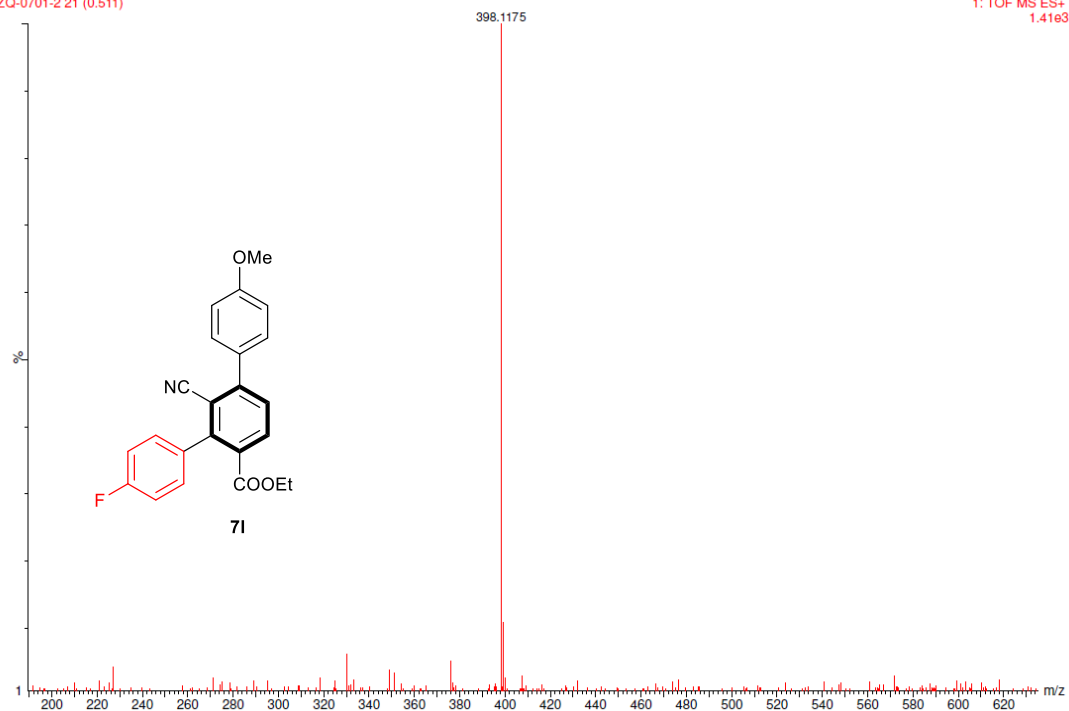

ZQ-190604-2 10 (0.265)

1: TOF MS ES+  
6.76e3

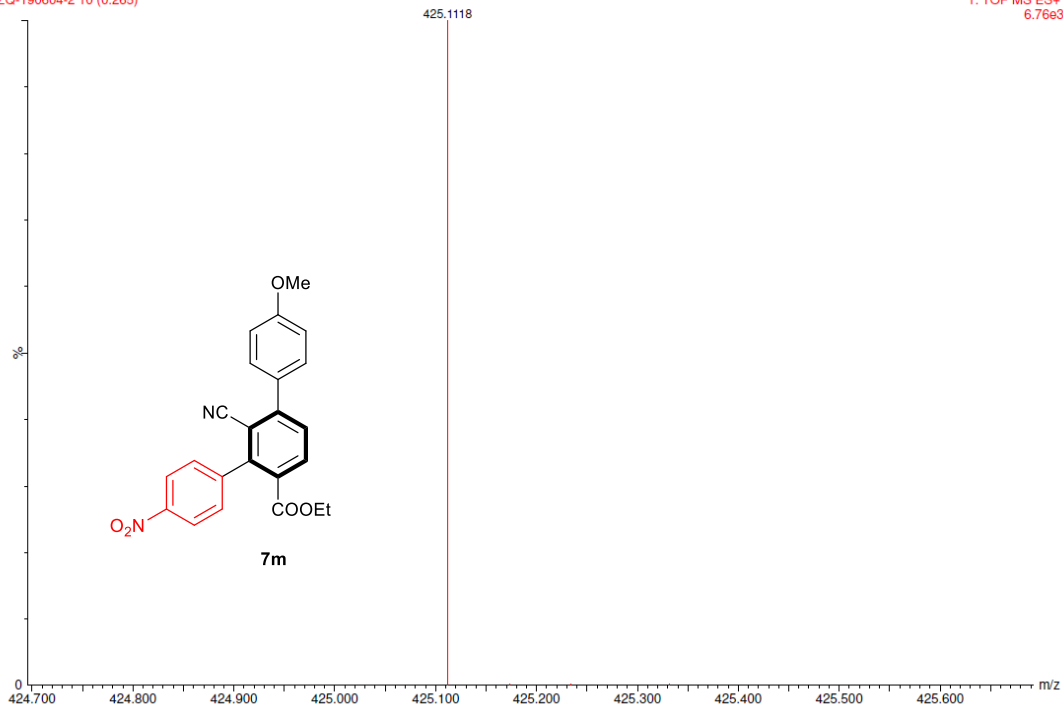

## 9. Control experiments results

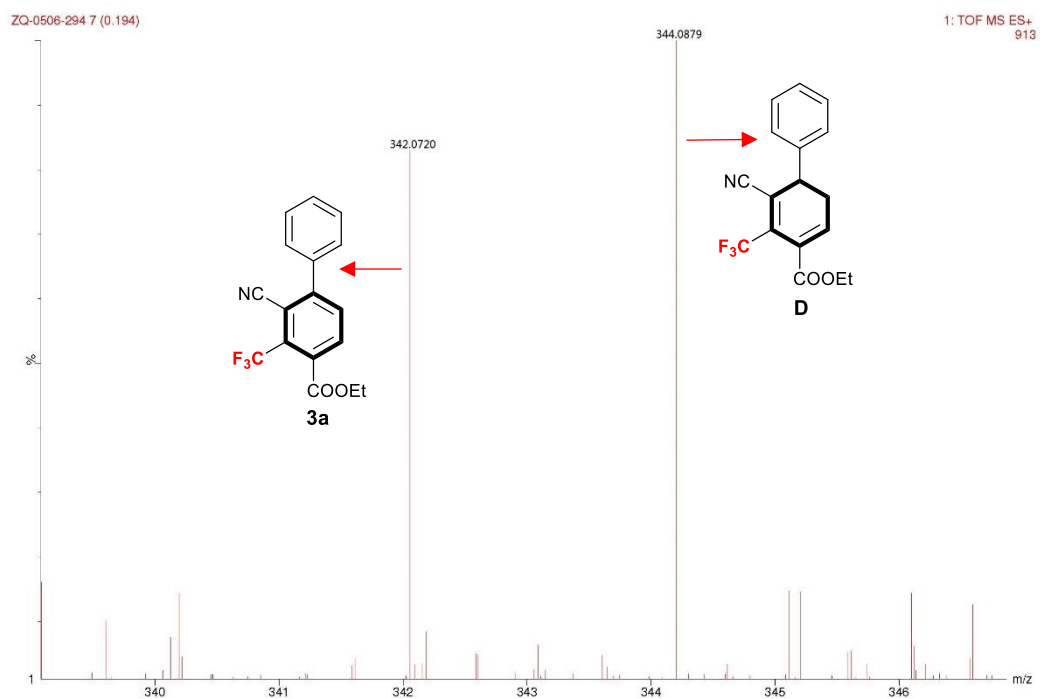

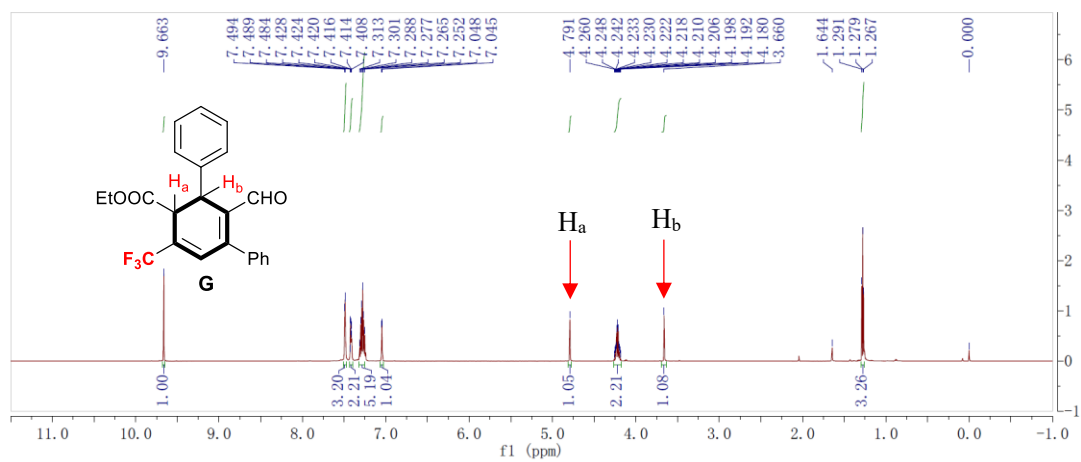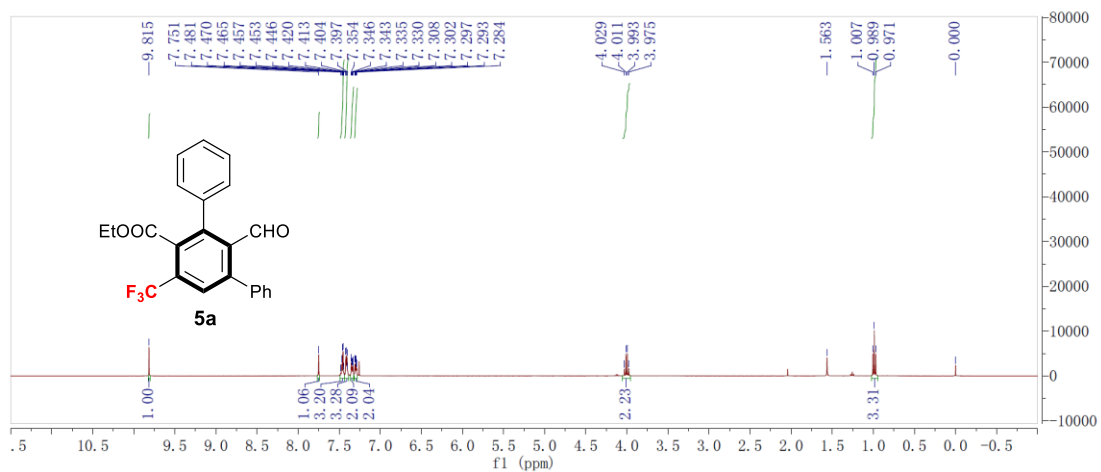

Supplement: c9gc02694k1.pdf [file c9gc02694k1.pdf]
